# Supplementary material for: Nol12 is a multifunctional RNA binding protein at the nexus of RNA and DNA metabolism
Source: Oxford University Press journal article supplement (doi:10.1093/nar/gkx963), 2017-10-10
Supplement: gkx963_supp.zip [file gkx963_supp.zip]

Archive with 2 entries (2 files):
- nar-01290-a-2017-File010.pdf
- nar-01290-a-2017-File011.xlsx
