# Supplementary material for: Nol12 is a multifunctional RNA binding protein at the nexus of RNA and DNA metabolism
Source: Oxford University Press journal article supplement (doi:10.1093/nar/gkx963), 2017-10-10
Supplement: gkx963_supp.zip [file gkx963_supp.zip › nar-01290-a-2017-File011.xlsx]

## Sheet: Table S1a
Nol12 pullout condition: 100 mM NaCl without RNAse A
Nol12	13236553		39|45	42	1	0	0	0	1	41	41
Bait	GI number	PreyGene	total spectral count (TSC) of sample duplicate	Average TSC (avgTSC)	flp-in #1 background TSC (bgTSC)	flp-in #2 background TSC (bgTSC)	PrA #1 background TSC (bgTSC)	PrA #2 background TSC (bgTSC)	highest bgTSC (hbgTSC)	avgTSC - hbgTSC	avgTSC - hbgTSC that are >= 2 TSC
NOL12	10947137	ABCF2	2|2	2	0	0	0	0	0	2	2
NOL12	4557303	ALDH3A2	2|2	2	0	0	0	0	0	2	2
NOL12	168229248	ASNS	2|2	2	0	0	0	0	0	2	2
NOL12	190014623	DIS3	2|2	2	0	0	0	0	0	2	2
NOL12	260274832	ECI2	2|2	2	0	0	0	0	0	2	2
NOL12	29826335	EIF2S2	2|2	2	0	0	0	0	0	2	2
NOL12	23397429	EIF3M	2|2	2	0	0	0	0	0	2	2
NOL12	253970500	EWSR1	2|2	2	0	0	0	0	0	2	2
NOL12	47174864	EXOSC5	2|2	2	0	0	0	0	0	2	2
NOL12	14670350	GTF2I	2|2	2	0	0	0	0	0	2	2
NOL12	14110414	HNRNPD	2|2	2	0	0	0	0	0	2	2
NOL12	310689049	LMNB1	2|2	2	0	0	0	0	0	2	2
NOL12	394582093	MCM3	2|2	2	0	0	0	0	0	2	2
NOL12	19557695	MED22	2|2	2	0	0	0	0	0	2	2
NOL12	14028877	MRPS25	2|2	2	0	0	0	0	0	2	2
NOL12	4504191	MSH6	2|2	2	0	0	0	0	0	2	2
NOL12	71361682	NUMA1	2|2	2	0	0	0	0	0	2	2
NOL12	57634534	NUP205	2|2	2	0	0	0	0	0	2	2
NOL12	23308577	PHGDH	4|4	4	2	0	0	0	2	2	2
NOL12	23110944	PSMA6	2|2	2	0	0	0	0	0	2	2
NOL12	157151755	RPP30	2|2	2	0	0	0	0	0	2	2
NOL12	153791300	SDAD1	2|2	2	0	0	0	0	0	2	2
NOL12	194363758	SRP9	2|2	2	0	0	0	0	0	2	2
NOL12	10835067	SSB	2|2	2	0	0	0	0	0	2	2
NOL12	325301072	SSR4	2|2	2	0	0	0	0	0	2	2
NOL12	11024714	UBB	2|2	2	0	0	0	0	0	2	2
NOL12	119220605	USP10	2|2	2	0	0	0	0	0	2	2
NOL12	117189975	HNRNPC	8|6	7	5	0	0	0	5	2	2
NOL12	5174735	TUBB4B	5|5	5	3	0	0	3	3	2	2
NOL12	167234419	THRAP3	5|5	5	3	0	3	2	3	2	2
NOL12	20149594	HSP90AB1	11|13	12	9	0	0	10	10	2	2
NOL12	261399877	CCT7	9|7	8	6	0	2	6	6	2	2
NOL12	259906018	ACIN1	4|0	2	0	0	0	0	0	2	2
NOL12	11125770	AIMP2	4|0	2	0	0	0	0	0	2	2
NOL12	4502303	ATP5O	0|4	2	0	0	0	0	0	2	2
NOL12	291621677	C18orf63	4|0	2	0	0	0	0	0	2	2
NOL12	5031635	CFL1	0|4	2	0	0	0	0	0	2	2
NOL12	21359867	CYC1	4|0	2	0	0	0	0	0	2	2
NOL12	431822375	DOCK7	4|0	2	0	0	0	0	0	2	2
NOL12	4758862	EEF1E1	4|0	2	0	0	0	0	0	2	2
NOL12	4503521	EIF3E	4|0	2	0	0	0	0	0	2	2
NOL12	4503513	EIF3I	4|0	2	0	0	0	0	0	2	2
NOL12	40556376	GLYR1	0|4	2	0	0	0	0	0	2	2
NOL12	16554616	MRPS6	0|4	2	0	0	0	0	0	2	2
NOL12	38045913	NME1	0|4	2	0	0	0	0	0	2	2
NOL12	4506127	PRPS1	0|4	2	0	0	0	0	0	2	2
NOL12	4506651	RPL36AL	0|4	2	0	0	0	0	0	2	2
NOL12	61743969	SEH1L	0|4	2	0	0	0	0	0	2	2
NOL12	103471995	SRFBP1	0|4	2	0	0	0	0	0	2	2
NOL12	148727341	STRAP	4|0	2	0	0	0	0	0	2	2
NOL12	38202255	TARS	0|4	2	0	0	0	0	0	2	2
NOL12	7549793	TBL2	0|4	2	0	0	0	0	0	2	2
NOL12	7019319	ABT1	3|2	2.5	0	0	0	0	0	2.5	2.5
NOL12	238776833	ALYREF	2|3	2.5	0	0	0	0	0	2.5	2.5
NOL12	209862831	ANXA2	2|3	2.5	0	0	0	0	0	2.5	2.5
NOL12	378786658	AURKB	3|2	2.5	0	0	0	0	0	2.5	2.5
NOL12	14150149	C7orf50	3|2	2.5	0	0	0	0	0	2.5	2.5
NOL12	38679912	C9orf114	3|2	2.5	0	0	0	0	0	2.5	2.5
NOL12	193794826	CYB5R3	3|2	2.5	0	0	0	0	0	2.5	2.5
NOL12	116805788	CYFIP2	2|3	2.5	0	0	0	0	0	2.5	2.5
NOL12	4504511	DNAJA1	3|2	2.5	0	0	0	0	0	2.5	2.5
NOL12	11136628	EEF1B2	3|2	2.5	0	0	0	0	0	2.5	2.5
NOL12	77812670	EXOSC9	2|3	2.5	0	0	0	0	0	2.5	2.5
NOL12	56699482	FAM98A	3|2	2.5	0	0	0	0	0	2.5	2.5
NOL12	283135173	FUS	2|3	2.5	0	0	0	0	0	2.5	2.5
NOL12	296317324	GNL3L	2|3	2.5	0	0	0	0	0	2.5	2.5
NOL12	73486658	GOT2	2|3	2.5	0	0	0	0	0	2.5	2.5
NOL12	74099697	HNRNPH2	3|2	2.5	0	0	0	0	0	2.5	2.5
NOL12	7661878	KIF14	2|3	2.5	0	0	0	0	0	2.5	2.5
NOL12	145580615	KRI1	2|3	2.5	0	0	0	0	0	2.5	2.5
NOL12	190194365	MTPAP	2|3	2.5	0	0	0	0	0	2.5	2.5
NOL12	23199998	NSUN5	3|2	2.5	0	0	0	0	0	2.5	2.5
NOL12	389886545	PRC1	2|3	2.5	0	0	0	0	0	2.5	2.5
NOL12	256222019	RAB10	3|2	2.5	0	0	0	0	0	2.5	2.5
NOL12	226497574	RBM19	2|3	2.5	0	0	0	0	0	2.5	2.5
NOL12	24308350	RRP36	2|3	2.5	0	0	0	0	0	2.5	2.5
NOL12	12758125	RRP8	2|3	2.5	0	0	0	0	0	2.5	2.5
NOL12	215490089	SAP18	3|2	2.5	0	0	0	0	0	2.5	2.5
NOL12	155722985	SMC5	2|3	2.5	0	0	0	0	0	2.5	2.5
NOL12	10937869	SMN2	3|2	2.5	0	0	0	0	0	2.5	2.5
NOL12	6912676	SNW1	2|3	2.5	0	0	0	0	0	2.5	2.5
NOL12	24497620	SRP68	2|3	2.5	0	0	0	0	0	2.5	2.5
NOL12	33188447	SRPK2	3|2	2.5	0	0	0	0	0	2.5	2.5
NOL12	23308697	SRPR	3|2	2.5	0	0	0	0	0	2.5	2.5
NOL12	4507241	SSRP1	3|2	2.5	0	0	0	0	0	2.5	2.5
NOL12	112789526	STAG2	3|2	2.5	0	0	0	0	0	2.5	2.5
NOL12	205277463	TKT	3|2	2.5	0	0	0	0	0	2.5	2.5
NOL12	120407068	TP53	2|3	2.5	0	0	0	0	0	2.5	2.5
NOL12	163792194	TRMT1L	2|3	2.5	0	0	0	0	0	2.5	2.5
NOL12	73760405	TMPO	4|9	6.5	4	0	0	0	4	2.5	2.5
NOL12	16507237	HSPA5	6|7	6.5	4	0	0	4	4	2.5	2.5
NOL12	4506341	ABCD3	0|5	2.5	0	0	0	0	0	2.5	2.5
NOL12	20127454	ATIC	0|5	2.5	0	0	0	0	0	2.5	2.5
NOL12	4557553	EMD	0|5	2.5	0	0	0	0	0	2.5	2.5
NOL12	209976986	PCID2	0|5	2.5	0	0	0	0	0	2.5	2.5
NOL12	10863889	SART1	0|5	2.5	0	0	0	0	0	2.5	2.5
NOL12	22749415	STT3A	5|0	2.5	0	0	0	0	0	2.5	2.5
NOL12	15011974	ARHGEF2	3|3	3	0	0	0	0	0	3	3
NOL12	75677353	ATAD3B	3|3	3	0	0	0	0	0	3	3
NOL12	106879206	C14orf169	3|3	3	0	0	0	0	0	3	3
NOL12	40018640	CDC73	3|3	3	0	0	0	0	0	3	3
NOL12	40789249	DARS2	3|3	3	0	0	0	0	0	3	3
NOL12	18375623	DDX39B	5|5	5	2	0	0	0	2	3	3
NOL12	195927037	DNMT1	2|4	3	0	0	0	0	0	3	3
NOL12	4503523	EIF3D	3|3	3	0	0	0	0	0	3	3
NOL12	84043963	EIF5B	3|3	3	0	0	0	0	0	3	3
NOL12	22095331	EMC1	3|3	3	0	0	0	0	0	3	3
NOL12	4503659	FAU	3|3	3	0	0	0	0	0	3	3
NOL12	372266127	FLII	3|3	3	0	0	0	0	0	3	3
NOL12	259013556	FXR2	3|3	3	0	0	0	0	0	3	3
NOL12	237820620	GRWD1	3|3	3	0	0	0	0	0	3	3
NOL12	4504327	HADHB	2|4	3	0	0	0	0	0	3	3
NOL12	217272802	HMMR	3|3	3	0	0	0	0	0	3	3
NOL12	13569960	ISG20L2	3|3	3	0	0	0	0	0	3	3
NOL12	31621305	LRPPRC	3|3	3	0	0	0	0	0	3	3
NOL12	24308207	LRRC47	2|4	3	0	0	0	0	0	3	3
NOL12	11559927	MRPS14	3|3	3	0	0	0	0	0	3	3
NOL12	13994257	MRPS21	2|4	3	0	0	0	0	0	3	3
NOL12	116812586	NCAPG2	2|4	3	0	0	0	0	0	3	3
NOL12	301336155	NSUN2	2|4	3	0	0	0	0	0	3	3
NOL12	24430149	NUP155	4|2	3	0	0	0	0	0	3	3
NOL12	222352151	PCBP1	3|3	3	0	0	0	0	0	3	3
NOL12	14141166	PCBP2	4|2	3	0	0	0	0	0	3	3
NOL12	4505753	PGAM1	4|2	3	0	0	0	0	0	3	3
NOL12	4505763	PGK1	3|3	3	0	0	0	0	0	3	3
NOL12	24497435	PSMC5	3|3	3	0	0	0	0	0	3	3
NOL12	186910300	RACGAP1	3|3	3	0	0	0	0	0	3	3
NOL12	14591902	RECQL	3|3	3	0	0	0	0	0	3	3
NOL12	4506629	RPL29	3|3	3	0	0	0	0	0	3	3
NOL12	4759276	RRP9	3|3	3	0	0	0	0	0	3	3
NOL12	38149981	SNRPB2	3|3	3	0	0	0	0	0	3	3
NOL12	109638749	SRP72	3|3	3	0	0	0	0	0	3	3
NOL12	86991438	SRSF5	3|3	3	0	0	0	0	0	3	3
NOL12	19557691	SURF4	3|3	3	0	0	0	0	0	3	3
NOL12	108796056	TROVE2	3|3	3	0	0	0	0	0	3	3
NOL12	4758638	PRDX6	8|4	6	3	0	0	2	3	3	3
NOL12	117168248	PTPLAD1	6|4	5	2	0	0	2	2	3	3
NOL12	5453555	RAN	6|4	5	2	0	2	0	2	3	3
NOL12	21361114	SLC25A11	9|3	6	3	0	0	0	3	3	3
NOL12	30795212	IGF2BP3	0|6	3	0	0	0	0	0	3	3
NOL12	62460637	IPO4	6|0	3	0	0	0	0	0	3	3
NOL12	337756501	MTHFD1L	0|6	3	0	0	0	0	0	3	3
NOL12	209413738	RPN2	6|0	3	0	0	0	0	0	3	3
NOL12	122114651	USP36	0|6	3	0	0	0	0	0	3	3
NOL12	29788785	TUBB	11|13	12	7	0	9	8	9	3	3
NOL12	54112121	SF3B3	20|20	20	11	3	13	17	17	3	3
NOL12	10947135	ABCF1	4|3	3.5	0	0	0	0	0	3.5	3.5
NOL12	4885079	ATP5C1	3|4	3.5	0	0	0	0	0	3.5	3.5
NOL12	38327625	CS	3|4	3.5	0	0	0	0	0	3.5	3.5
NOL12	4758256	EIF2S1	2|5	3.5	0	0	0	0	0	3.5	3.5
NOL12	7661920	EIF4A3	5|6	5.5	2	0	0	2	2	3.5	3.5
NOL12	38201714	ELAVL1	4|3	3.5	0	0	0	0	0	3.5	3.5
NOL12	161702986	EZR	3|4	3.5	0	0	0	0	0	3.5	3.5
NOL12	17158023	FAM207A	4|3	3.5	0	0	0	0	0	3.5	3.5
NOL12	52632383	HNRNPL	5|6	5.5	2	0	0	0	2	3.5	3.5
NOL12	4504483	HPRT1	3|4	3.5	0	0	0	0	0	3.5	3.5
NOL12	4758504	HSD17B10	4|3	3.5	0	0	0	0	0	3.5	3.5
NOL12	20143967	KIF23	4|3	3.5	0	0	0	0	0	3.5	3.5
NOL12	148612849	KIF2A	3|4	3.5	0	0	0	0	0	3.5	3.5
NOL12	224591430	LYAR	5|2	3.5	0	0	0	0	0	3.5	3.5
NOL12	27436901	MRPL12	3|4	3.5	0	0	0	0	0	3.5	3.5
NOL12	15809016	MYL12B	4|3	3.5	0	0	0	0	0	3.5	3.5
NOL12	17986258	MYL6	3|4	3.5	0	0	0	0	0	3.5	3.5
NOL12	40217805	NOL9	4|3	3.5	0	0	0	0	0	3.5	3.5
NOL12	15487670	NXF1	3|4	3.5	0	0	0	0	0	3.5	3.5
NOL12	20070125	P4HB	4|3	3.5	0	0	0	0	0	3.5	3.5
NOL12	208431833	PABPC4	4|3	3.5	0	0	0	0	0	3.5	3.5
NOL12	7657269	PDS5B	3|4	3.5	0	0	0	0	0	3.5	3.5
NOL12	14589951	POLR2E	4|3	3.5	0	0	0	0	0	3.5	3.5
NOL12	21361399	PPP2R1A	2|5	3.5	0	0	0	0	0	3.5	3.5
NOL12	4506675	RPN1	5|2	3.5	0	0	0	0	0	3.5	3.5
NOL12	4506701	RPS23	4|7	5.5	2	0	0	0	2	3.5	3.5
NOL12	21040326	SON	5|2	3.5	0	0	0	0	0	3.5	3.5
NOL12	215272341	THOC6	3|4	3.5	0	0	0	0	0	3.5	3.5
NOL12	10863945	XRCC5	5|6	5.5	2	0	0	0	2	3.5	3.5
NOL12	409264581	ZNF598	3|4	3.5	0	0	0	0	0	3.5	3.5
NOL12	4503481	EEF1G	5|6	5.5	2	0	2	2	2	3.5	3.5
NOL12	4758024	COIL	0|7	3.5	0	0	0	0	0	3.5	3.5
NOL12	350276247	PPP1CC	7|0	3.5	0	0	0	0	0	3.5	3.5
NOL12	4502201	ARF1	4|4	4	0	0	0	0	0	4	4
NOL12	283436220	ATAD3A	10|10	10	6	0	0	2	6	4	4
NOL12	10716563	CANX	4|4	4	0	0	0	0	0	4	4
NOL12	4503519	EIF3F	4|4	4	0	0	0	0	0	4	4
NOL12	189083688	EXOSC7	3|5	4	0	0	0	0	0	4	4
NOL12	61835148	FXR1	4|4	4	0	0	0	0	0	4	4
NOL12	5174449	H1FX	4|4	4	0	0	0	0	0	4	4
NOL12	345199283	HDLBP	6|2	4	0	0	0	0	0	4	4
NOL12	34740329	HNRNPA3	4|4	4	0	0	0	0	0	4	4
NOL12	38327039	HSPA4	2|6	4	0	0	0	0	0	4	4
NOL12	4504897	KPNA2	3|5	4	0	0	0	0	0	4	4
NOL12	14150124	LLPH	4|4	4	0	0	0	0	0	4	4
NOL12	20162572	NDNL2	4|4	4	0	0	0	0	0	4	4
NOL12	6681764	NDUFA9	3|5	4	0	0	0	0	0	4	4
NOL12	111038128	NGDN	3|5	4	0	0	0	0	0	4	4
NOL12	4505773	PHB	8|6	7	3	0	0	2	3	4	4
NOL12	4506619	RPL24	5|3	4	0	0	0	0	0	4	4
NOL12	4506643	RPL37A	4|4	4	0	0	0	0	0	4	4
NOL12	21389315	SLC25A1	4|4	4	0	0	0	0	0	4	4
NOL12	192807312	SMARCA4	4|4	4	0	0	0	0	0	4	4
NOL12	325651836	SMARCA5	6|2	4	0	0	0	0	0	4	4
NOL12	109948304	SMU1	5|7	6	2	0	0	0	2	4	4
NOL12	77404397	SND1	5|3	4	0	0	0	0	0	4	4
NOL12	345197228	TRA2B	5|3	4	0	0	0	0	0	4	4
NOL12	156415994	UTP11L	5|3	4	0	0	0	0	0	4	4
NOL12	208879465	VDAC3	5|3	4	0	0	0	0	0	4	4
NOL12	269847874	YTHDC2	4|4	4	0	0	0	0	0	4	4
NOL12	5803225	YWHAE	3|5	4	0	0	0	0	0	4	4
NOL12	22202629	AIFM1	4|5	4.5	0	0	0	0	0	4.5	4.5
NOL12	215490009	AIMP1	6|3	4.5	0	0	0	0	0	4.5	4.5
NOL12	24638454	ATP2A2	6|3	4.5	0	0	0	0	0	4.5	4.5
NOL12	117938251	BCLAF1	3|6	4.5	0	0	0	0	0	4.5	4.5
NOL12	205360838	DNAJA3	5|4	4.5	0	0	0	0	0	4.5	4.5
NOL12	4503507	EIF2S3	5|4	4.5	0	0	0	0	0	4.5	4.5
NOL12	339275831	EIF3L	6|3	4.5	0	0	0	0	0	4.5	4.5
NOL12	18093112	ESF1	3|6	4.5	0	0	0	0	0	4.5	4.5
NOL12	17402904	EXOSC6	4|5	4.5	0	0	0	0	0	4.5	4.5
NOL12	6598323	GDI2	4|5	4.5	0	0	0	0	0	4.5	4.5
NOL12	28195394	HIST2H2AB	6|3	4.5	0	0	0	0	0	4.5	4.5
NOL12	4507677	HSP90B1	5|4	4.5	0	0	0	0	0	4.5	4.5
NOL12	8922794	IMP3	4|5	4.5	0	0	0	0	0	4.5	4.5
NOL12	39725634	LARP1	4|5	4.5	0	0	0	0	0	4.5	4.5
NOL12	7662645	MRPS18B	5|4	4.5	0	0	0	0	0	4.5	4.5
NOL12	4826860	NHP2L1	4|5	4.5	0	0	0	0	0	4.5	4.5
NOL12	284507298	OAT	2|7	4.5	0	0	0	0	0	4.5	4.5
NOL12	5031973	PDIA6	6|3	4.5	0	0	0	0	0	4.5	4.5
NOL12	11321601	PFKP	4|5	4.5	0	0	0	0	0	4.5	4.5
NOL12	10863927	PPIA	6|7	6.5	2	0	0	0	2	4.5	4.5
NOL12	89276756	PRPF4B	2|7	4.5	0	0	0	0	0	4.5	4.5
NOL12	15431290	RPL11	8|5	6.5	2	0	0	2	2	4.5	4.5
NOL12	5730023	RUVBL2	5|4	4.5	0	0	0	0	0	4.5	4.5
NOL12	4505775	SLC25A3	7|8	7.5	3	0	0	0	3	4.5	4.5
NOL12	110347418	SMC2	4|5	4.5	0	0	0	0	0	4.5	4.5
NOL12	4506901	SRSF3	5|4	4.5	0	0	0	0	0	4.5	4.5
NOL12	6005757	SUPT16H	4|5	4.5	0	0	0	0	0	4.5	4.5
NOL12	19557702	SURF6	3|6	4.5	0	0	0	0	0	4.5	4.5
NOL12	228008291	SYNCRIP	5|4	4.5	0	0	0	0	0	4.5	4.5
NOL12	375298717	TUBGCP2	4|5	4.5	0	0	0	0	0	4.5	4.5
NOL12	296317337	VDAC2	5|4	4.5	0	0	0	0	0	4.5	4.5
NOL12	38455427	CCT4	11|6	8.5	4	0	0	3	4	4.5	4.5
NOL12	63162572	CCT3	9|7	8	3	0	0	3	3	5	5
NOL12	31542656	DDX49	5|5	5	0	0	0	0	0	5	5
NOL12	20336302	DHX33	4|6	5	0	0	0	0	0	5	5
NOL12	29029601	DHX37	4|6	5	0	0	0	0	0	5	5
NOL12	37595750	LBR	5|5	5	0	0	0	0	0	5	5
NOL12	194328685	MYO1B	6|4	5	0	0	0	0	0	5	5
NOL12	51100974	MYO1D	4|6	5	0	0	0	0	0	5	5
NOL12	291084505	NKRF	4|6	5	0	0	0	0	0	5	5
NOL12	124494254	PA2G4	6|8	7	2	0	2	0	2	5	5
NOL12	238859597	RBM34	4|6	5	0	0	0	0	0	5	5
NOL12	4506625	RPL27A	5|5	5	0	0	0	0	0	5	5
NOL12	25092725	RRP7A	4|6	5	0	0	0	0	0	5	5
NOL12	50658063	SMC4	4|6	5	0	0	0	0	0	5	5
NOL12	13375848	SMC6	2|8	5	0	0	0	0	0	5	5
NOL12	148839305	SMCHD1	4|6	5	0	0	0	0	0	5	5
NOL12	149999611	SRP14	5|5	5	0	0	0	0	0	5	5
NOL12	24475816	TECR	4|6	5	0	0	0	0	0	5	5
NOL12	48526509	TIMM50	5|5	5	0	0	0	0	0	5	5
NOL12	34147630	TUFM	5|5	5	0	0	0	0	0	5	5
NOL12	23510338	UBA1	5|5	5	0	0	0	0	0	5	5
NOL12	4507879	VDAC1	5|5	5	0	0	0	0	0	5	5
NOL12	13376181	TUBAL3	0|10	5	0	0	0	0	0	5	5
NOL12	9951915	AHCY	3|8	5.5	0	0	0	0	0	5.5	5.5
NOL12	193794814	ALDOA	9|6	7.5	0	0	0	2	2	5.5	5.5
NOL12	291575128	LDHB	12|11	11.5	4	2	2	6	6	5.5	5.5
NOL12	16554609	MRPS11	6|5	5.5	0	0	0	0	0	5.5	5.5
NOL12	16554604	MRPS23	6|5	5.5	0	0	0	0	0	5.5	5.5
NOL12	222136639	MTHFD1	7|8	7.5	2	0	0	0	2	5.5	5.5
NOL12	28212272	NOP9	5|6	5.5	0	0	0	0	0	5.5	5.5
NOL12	46367787	PABPC1	6|5	5.5	0	0	0	0	0	5.5	5.5
NOL12	56699409	RBMX	9|8	8.5	0	0	3	0	3	5.5	5.5
NOL12	4506613	RPL22	7|4	5.5	0	0	0	0	0	5.5	5.5
NOL12	4506623	RPL27	8|7	7.5	2	0	0	0	2	5.5	5.5
NOL12	148746199	RPL31	6|5	5.5	0	0	0	0	0	5.5	5.5
NOL12	16117794	RPL36	6|5	5.5	0	0	0	0	0	5.5	5.5
NOL12	226246671	RPS20	6|5	5.5	0	0	0	0	0	5.5	5.5
NOL12	15011936	RPS26	7|4	5.5	0	0	0	0	0	5.5	5.5
NOL12	10047102	RSL24D1	7|4	5.5	0	0	0	0	0	5.5	5.5
NOL12	237649019	SLC25A13	4|7	5.5	0	0	0	0	0	5.5	5.5
NOL12	47419936	SRPK1	6|5	5.5	0	0	0	0	0	5.5	5.5
NOL12	306482694	SRSF7	4|7	5.5	0	0	0	0	0	5.5	5.5
NOL12	197333811	URB2	5|6	5.5	0	0	0	0	0	5.5	5.5
NOL12	6005942	VCP	4|7	5.5	0	0	0	0	0	5.5	5.5
NOL12	18860916	XRN2	6|5	5.5	0	0	0	0	0	5.5	5.5
NOL12	225007648	POP1	11|0	5.5	0	0	0	0	0	5.5	5.5
NOL12	54112117	SF3B1	37|30	33.5	28	9	12	20	28	5.5	5.5
NOL12	51599156	CHD4	6|6	6	0	0	0	0	0	6	6
NOL12	19920317	CKAP4	7|5	6	0	0	0	0	0	6	6
NOL12	153791492	EIF3CL	5|7	6	0	0	0	0	0	6	6
NOL12	209869993	GART	5|7	6	0	0	0	0	0	6	6
NOL12	14043072	HNRNPA2B1	9|11	10	0	0	4	0	4	6	6
NOL12	381342476	HNRNPH1	7|5	6	0	0	0	0	0	6	6
NOL12	21735621	MDH2	6|6	6	0	0	0	0	0	6	6
NOL12	16554611	MRPS15	6|6	6	0	0	0	0	0	6	6
NOL12	221307584	PHB2	10|8	9	3	0	0	2	3	6	6
NOL12	4506681	RPS11	6|6	6	0	0	0	0	0	6	6
NOL12	4506707	RPS25	8|4	6	0	0	0	0	0	6	6
NOL12	21361499	SENP3	5|7	6	0	0	0	0	0	6	6
NOL12	68160937	TRIM25	8|4	6	0	0	0	0	0	6	6
NOL12	382546007	ATP5A1	14|10	12	6	4	0	4	6	6	6
NOL12	55749531	SF3B2	14|16	15	8	0	8	9	9	6	6
NOL12	124256496	HSPA1L	12|0	6	0	0	0	0	0	6	6
NOL12	51173724	BYSL	7|6	6.5	0	0	0	0	0	6.5	6.5
NOL12	154759257	DDX51	6|7	6.5	0	0	0	0	0	6.5	6.5
NOL12	70995211	ECH1	7|6	6.5	0	0	0	0	0	6.5	6.5
NOL12	194328699	EMG1	6|7	6.5	0	0	0	0	0	6.5	6.5
NOL12	20336746	H2AFY	6|7	6.5	0	0	0	0	0	6.5	6.5
NOL12	24234688	HSPA9	7|12	9.5	3	0	0	2	3	6.5	6.5
NOL12	117676403	KRR1	6|7	6.5	0	0	0	0	0	6.5	6.5
NOL12	260099723	LDHA	7|10	8.5	2	0	0	2	2	6.5	6.5
NOL12	149999606	MOGS	4|9	6.5	0	0	0	0	0	6.5	6.5
NOL12	16554607	MRPS10	8|5	6.5	0	0	0	0	0	6.5	6.5
NOL12	215982791	MYO5A	5|8	6.5	0	0	0	0	0	6.5	6.5
NOL12	13569843	NOL7	6|7	6.5	0	0	0	0	0	6.5	6.5
NOL12	6005860	RPL35	8|5	6.5	0	0	0	0	0	6.5	6.5
NOL12	4506645	RPL38	11|10	10.5	4	0	0	4	4	6.5	6.5
NOL12	48762932	CCT8	9|11	10	3	0	0	3	3	7	7
NOL12	4503529	EIF4A1	8|6	7	0	0	0	0	0	7	7
NOL12	14165435	HNRNPK	8|6	7	0	0	0	0	0	7	7
NOL12	124494238	MYO1C	9|5	7	0	0	0	0	0	7	7
NOL12	14165464	PTBP1	12|6	9	0	0	0	2	2	7	7
NOL12	78000181	RPL14	5|9	7	0	0	0	0	0	7	7
NOL12	14916501	RPS24	8|10	9	0	0	0	2	2	7	7
NOL12	154355000	KHSRP	13|13	13	6	6	3	5	6	7	7
NOL12	12025678	ACTN4	9|12	10.5	3	0	0	0	3	7.5	7.5
NOL12	7706322	C14orf166	7|8	7.5	0	0	0	0	0	7.5	7.5
NOL12	21361794	CAND1	7|8	7.5	0	0	0	0	0	7.5	7.5
NOL12	24307939	CCT5	12|7	9.5	0	0	0	2	2	7.5	7.5
NOL12	11067747	CDC5L	8|7	7.5	0	0	0	0	0	7.5	7.5
NOL12	229892270	DCAF13	8|7	7.5	0	0	0	0	0	7.5	7.5
NOL12	41327779	DDX55	8|7	7.5	0	0	0	0	0	7.5	7.5
NOL12	208431827	EIF2AK2	5|10	7.5	0	0	0	0	0	7.5	7.5
NOL12	31563378	EIF6	7|8	7.5	0	0	0	0	0	7.5	7.5
NOL12	15529982	IMP4	7|8	7.5	0	0	0	0	0	7.5	7.5
NOL12	19923142	KPNB1	8|7	7.5	0	0	0	0	0	7.5	7.5
NOL12	7705805	MRPS2	8|7	7.5	0	0	0	0	0	7.5	7.5
NOL12	33188463	MRPS9	8|7	7.5	0	0	0	0	0	7.5	7.5
NOL12	7705437	NIP7	9|6	7.5	0	0	0	0	0	7.5	7.5
NOL12	322303127	RPS10	9|10	9.5	2	0	0	0	2	7.5	7.5
NOL12	4506753	RUVBL1	7|8	7.5	0	0	0	0	0	7.5	7.5
NOL12	221219004	WDR74	8|7	7.5	0	0	0	0	0	7.5	7.5
NOL12	4503841	XRCC6	9|10	9.5	2	0	0	0	2	7.5	7.5
NOL12	11415030	HIST1H4J	19|18	18.5	11	4	7	6	11	7.5	7.5
NOL12	32189394	ATP5B	11|15	13	5	0	0	5	5	8	8
NOL12	33239445	EIF3B	10|6	8	0	0	0	0	0	8	8
NOL12	297374777	FMR1	8|8	8	0	0	0	0	0	8	8
NOL12	4885281	GLUD1	12|8	10	2	0	0	0	2	8	8
NOL12	40254924	LRRC59	8|8	8	0	0	0	0	0	8	8
NOL12	157426877	RCL1	7|9	8	0	0	0	0	0	8	8
NOL12	223890243	RPL10	9|7	8	0	0	0	0	0	8	8
NOL12	4506609	RPL19	9|7	8	0	0	0	0	0	8	8
NOL12	5032051	RPS14	9|7	8	0	0	0	0	0	8	8
NOL12	4506691	RPS16	14|12	13	5	0	0	2	5	8	8
NOL12	15718687	RPS3	14|14	14	5	4	3	6	6	8	8
NOL12	7657015	RTCB	8|8	8	0	0	0	0	0	8	8
NOL12	4502491	C1QBP	9|8	8.5	0	0	0	0	0	8.5	8.5
NOL12	215599015	DKC1	6|11	8.5	0	0	0	0	0	8.5	8.5
NOL12	302699237	EIF4G1	10|7	8.5	0	0	0	0	0	8.5	8.5
NOL12	31542947	HSPD1	15|12	13.5	5	0	0	4	5	8.5	8.5
NOL12	56237027	IGF2BP1	8|9	8.5	0	0	0	0	0	8.5	8.5
NOL12	4504733	IRS4	13|10	11.5	3	0	0	0	3	8.5	8.5
NOL12	194272210	KARS	10|11	10.5	2	0	0	0	2	8.5	8.5
NOL12	10047140	PNO1	8|9	8.5	0	0	0	0	0	8.5	8.5
NOL12	76781492	REXO4	7|10	8.5	0	0	0	0	0	8.5	8.5
NOL12	14165469	RPS15A	12|11	11.5	3	2	0	0	3	8.5	8.5
NOL12	19923315	SHMT2	11|10	10.5	0	0	0	2	2	8.5	8.5
NOL12	5902076	SRSF1	9|8	8.5	0	0	0	0	0	8.5	8.5
NOL12	125656165	THOC2	8|9	8.5	0	0	0	0	0	8.5	8.5
NOL12	194394141	URB1	6|11	8.5	0	0	0	0	0	8.5	8.5
NOL12	148536853	COPA	8|10	9	0	0	0	0	0	9	9
NOL12	54633315	DNTTIP2	8|10	9	0	0	0	0	0	9	9
NOL12	19923403	EXOSC2	9|9	9	0	0	0	0	0	9	9
NOL12	24234686	HSPA8	18|16	17	6	0	2	8	8	9	9
NOL12	13654270	LAS1L	7|11	9	0	0	0	0	0	9	9
NOL12	14043022	MARS	11|11	11	2	0	0	0	2	9	9
NOL12	14269586	MRPS26	10|8	9	0	0	0	0	0	9	9
NOL12	7661730	MRPS28	10|8	9	0	0	0	0	0	9	9
NOL12	62234461	NLE1	8|10	9	0	0	0	0	0	9	9
NOL12	171460958	NOL10	8|10	9	0	0	0	0	0	9	9
NOL12	7662677	NSA2	12|6	9	0	0	0	0	0	9	9
NOL12	281604136	PGAM5	8|10	9	0	0	0	0	0	9	9
NOL12	109240550	PSPC1	8|10	9	0	0	0	0	0	9	9
NOL12	16117791	RPL35A	12|10	11	2	0	2	0	2	9	9
NOL12	4506687	RPS15	9|9	9	0	0	0	0	0	9	9
NOL12	11968182	RPS18	14|10	12	2	0	3	3	3	9	9
NOL12	126362983	RRP15	10|8	9	0	0	0	0	0	9	9
NOL12	229577436	SPATA5L1	11|7	9	0	0	0	0	0	9	9
NOL12	19913406	TOP2A	8|10	9	0	0	0	0	0	9	9
NOL12	39780588	TSR1	10|8	9	0	0	0	0	0	9	9
NOL12	38569421	ACLY	12|13	12.5	3	0	0	0	3	9.5	9.5
NOL12	42558250	CAPRIN1	8|11	9.5	0	0	0	0	0	9.5	9.5
NOL12	13129104	CCDC86	10|9	9.5	0	0	0	0	0	9.5	9.5
NOL12	5453603	CCT2	15|10	12.5	3	0	0	3	3	9.5	9.5
NOL12	57164942	CKAP5	8|11	9.5	0	0	0	0	0	9.5	9.5
NOL12	21536286	CKB	11|14	12.5	3	0	0	2	3	9.5	9.5
NOL12	18201905	GPI	13|16	14.5	0	0	5	0	5	9.5	9.5
NOL12	14043070	HNRNPA1	13|12	12.5	0	0	3	2	3	9.5	9.5
NOL12	13994259	MRPS5	10|9	9.5	0	0	0	0	0	9.5	9.5
NOL12	7657381	PRPF19	11|12	11.5	2	0	0	2	2	9.5	9.5
NOL12	4506605	RPL23	11|12	11.5	2	0	0	0	2	9.5	9.5
NOL12	16117787	RPL34	8|11	9.5	0	0	0	0	0	9.5	9.5
NOL12	312284072	RPS17L	15|4	9.5	0	0	0	0	0	9.5	9.5
NOL12	57863257	TCP1	9|10	9.5	0	0	0	0	0	9.5	9.5
NOL12	4502643	CCT6A	13|13	13	3	0	0	2	3	10	10
NOL12	31543091	MAK16	10|10	10	0	0	0	0	0	10	10
NOL12	186928850	MRPS27	11|9	10	0	0	0	0	0	10	10
NOL12	186928852	MRPS7	9|11	10	0	0	0	0	0	10	10
NOL12	365192532	MYH10	9|11	10	0	0	0	0	0	10	10
NOL12	55769546	PAK1IP1	10|10	10	0	0	0	0	0	10	10
NOL12	155030232	PELP1	10|10	10	0	0	0	0	0	10	10
NOL12	15149476	RARS	13|11	12	2	0	0	0	2	10	10
NOL12	11415026	RPL18A	11|9	10	0	0	0	0	0	10	10
NOL12	16905526	DAP3	12|9	10.5	0	0	0	0	0	10.5	10.5
NOL12	41327771	DDX23	13|12	12.5	0	0	0	2	2	10.5	10.5
NOL12	116063573	FLNA	12|9	10.5	0	0	0	0	0	10.5	10.5
NOL12	14141161	HNRNPU	14|19	16.5	6	0	2	4	6	10.5	10.5
NOL12	145275210	RPF1	9|12	10.5	0	0	0	0	0	10.5	10.5
NOL12	4506607	RPL18	9|12	10.5	0	0	0	0	0	10.5	10.5
NOL12	4506631	RPL30	10|11	10.5	0	0	0	0	0	10.5	10.5
NOL12	15431306	RPL8	13|8	10.5	0	0	0	0	0	10.5	10.5
NOL12	9966799	UTP3	10|11	10.5	0	0	0	0	0	10.5	10.5
NOL12	56243583	WDR18	10|11	10.5	0	0	0	0	0	10.5	10.5
NOL12	68509926	DHX15	20|29	24.5	14	4	4	12	14	10.5	10.5
NOL12	76880486	ASCC3	10|12	11	0	0	0	0	0	11	11
NOL12	301171467	DDX3X	10|12	11	0	0	0	0	0	11	11
NOL12	4758340	FARSA	8|14	11	0	0	0	0	0	11	11
NOL12	13027604	MRPS34	13|9	11	0	0	0	0	0	11	11
NOL12	18104948	RPL21	11|11	11	0	0	0	0	0	11	11
NOL12	14141193	RPS9	16|14	15	3	2	2	4	4	11	11
NOL12	157671927	SPATA5	8|14	11	0	0	0	0	0	11	11
NOL12	301601658	ADAR	11|12	11.5	0	0	0	0	0	11.5	11.5
NOL12	21361181	ATP1A1	9|14	11.5	0	0	0	0	0	11.5	11.5
NOL12	45439306	DARS	10|13	11.5	0	0	0	0	0	11.5	11.5
NOL12	13514831	DDX10	9|14	11.5	0	0	0	0	0	11.5	11.5
NOL12	212549553	ILF3	10|13	11.5	0	0	0	0	0	11.5	11.5
NOL12	21626466	MATR3	16|15	15.5	4	0	0	0	4	11.5	11.5
NOL12	16950603	MRPS35	11|12	11.5	0	0	0	0	0	11.5	11.5
NOL12	148596949	NOLC1	6|17	11.5	0	0	0	0	0	11.5	11.5
NOL12	310923196	PPAN-P2RY11	11|12	11.5	0	0	0	0	0	11.5	11.5
NOL12	4506635	RPL32	12|11	11.5	0	0	0	0	0	11.5	11.5
NOL12	15431303	RPL9	17|12	14.5	3	0	0	0	3	11.5	11.5
NOL12	7657013	AATF	12|12	12	0	0	0	0	0	12	12
NOL12	4501885	ACTB	17|17	17	4	0	3	5	5	12	12
NOL12	9966805	DDX24	11|13	12	0	0	0	0	0	12	12
NOL12	38327552	G3BP1	15|9	12	0	0	0	0	0	12	12
NOL12	94721239	IARS	14|14	14	2	0	0	0	2	12	12
NOL12	12667788	MYH9	14|14	14	2	0	0	0	2	12	12
NOL12	148747209	NOP16	11|13	12	0	0	0	0	0	12	12
NOL12	4826960	QARS	11|13	12	0	0	0	0	0	12	12
NOL12	4506597	RPL12	14|10	12	0	0	0	0	0	12	12
NOL12	4506621	RPL26	11|13	12	0	0	0	0	0	12	12
NOL12	4506671	RPLP2	13|15	14	2	0	0	0	2	12	12
NOL12	40548332	CCDC137	14|11	12.5	0	0	0	0	0	12.5	12.5
NOL12	4506787	IQGAP1	12|13	12.5	0	0	0	0	0	12.5	12.5
NOL12	40807485	PRPF6	13|12	12.5	0	0	0	0	0	12.5	12.5
NOL12	17105394	RPL23A	12|17	14.5	2	0	0	0	2	12.5	12.5
NOL12	376319199	USP39	12|13	12.5	0	0	0	0	0	12.5	12.5
NOL12	49574529	UTP6	11|14	12.5	0	0	0	0	0	12.5	12.5
NOL12	20149629	DDX47	13|13	13	0	0	0	0	0	13	13
NOL12	13129006	DDX50	15|11	13	0	0	0	0	0	13	13
NOL12	124028525	FARSB	14|12	13	0	0	0	0	0	13	13
NOL12	45643123	NVL	12|14	13	0	0	0	0	0	13	13
NOL12	239787829	GLTSCR2	14|13	13.5	0	0	0	0	0	13.5	13.5
NOL12	24234747	ILF2	14|13	13.5	0	0	0	0	0	13.5	13.5
NOL12	24415404	MDN1	12|15	13.5	0	0	0	0	0	13.5	13.5
NOL12	13129068	NOC4L	12|16	14	0	0	0	0	0	14	14
NOL12	156523968	PARP1	17|15	16	2	0	0	0	2	14	14
NOL12	332164775	PKM	22|20	21	7	0	0	5	7	14	14
NOL12	15431293	RPL15	17|17	17	3	0	0	0	3	14	14
NOL12	15055539	RPS2	14|20	17	3	0	0	2	3	14	14
NOL12	4826686	DDX1	14|15	14.5	0	0	0	0	0	14.5	14.5
NOL12	378404908	GAPDH	22|19	20.5	4	2	3	6	6	14.5	14.5
NOL12	20127408	HADHA	11|18	14.5	0	0	0	0	0	14.5	14.5
NOL12	108773810	LARS	15|14	14.5	0	0	0	0	0	14.5	14.5
NOL12	18490987	MRTO4	17|12	14.5	0	0	0	0	0	14.5	14.5
NOL12	13904870	RPS5	15|14	14.5	0	0	0	0	0	14.5	14.5
NOL12	4758012	CLTC	19|15	17	2	0	0	0	2	15	15
NOL12	33350932	DYNC1H1	14|16	15	0	0	0	0	0	15	15
NOL12	4503509	EIF3A	21|9	15	0	0	0	0	0	15	15
NOL12	55769587	NOP14	13|17	15	0	0	0	0	0	15	15
NOL12	5454064	RBM14	14|16	15	0	0	0	0	0	15	15
NOL12	395132450	RPL13A	13|17	15	0	0	0	0	0	15	15
NOL12	4506685	RPS13	19|17	18	3	0	0	2	3	15	15
NOL12	118344456	UTP18	17|13	15	0	0	0	0	0	15	15
NOL12	256773176	WDR46	12|18	15	0	0	0	0	0	15	15
NOL12	186928847	CIRH1A	17|14	15.5	0	0	0	0	0	15.5	15.5
NOL12	38569505	DDX52	13|18	15.5	0	0	0	0	0	15.5	15.5
NOL12	4505917	EXOSC10	12|19	15.5	0	0	0	0	0	15.5	15.5
NOL12	54607053	GCN1L1	19|12	15.5	0	0	0	0	0	15.5	15.5
NOL12	31317305	MPHOSPH10	14|17	15.5	0	0	0	0	0	15.5	15.5
NOL12	48762926	PWP2	14|17	15.5	0	0	0	0	0	15.5	15.5
NOL12	4506743	RPS8	15|16	15.5	0	0	0	0	0	15.5	15.5
NOL12	207113160	TCOF1	12|19	15.5	0	0	0	0	0	15.5	15.5
NOL12	148613856	DDX17	20|18	19	0	0	0	3	3	16	16
NOL12	4758138	DDX5	18|24	21	5	0	2	4	5	16	16
NOL12	167466173	HSPA1B	27|23	25	9	0	4	8	9	16	16
NOL12	187960109	RBM28	16|16	16	0	0	0	0	0	16	16
NOL12	39930469	RPF2	13|19	16	0	0	0	0	0	16	16
NOL12	66346679	SERBP1	16|16	16	0	0	0	0	0	16	16
NOL12	193211480	SKIV2L2	14|18	16	0	0	0	0	0	16	16
NOL12	239787838	TEX10	16|16	16	0	0	0	0	0	16	16
NOL12	157743245	WDR43	16|16	16	0	0	0	0	0	16	16
NOL12	153792590	HSP90AA1	18|29	23.5	7	2	3	0	7	16.5	16.5
NOL12	9910244	MRPS22	16|17	16.5	0	0	0	0	0	16.5	16.5
NOL12	4506661	RPL7A	17|22	19.5	3	0	0	0	3	16.5	16.5
NOL12	17158044	RPS6	22|15	18.5	2	0	0	0	2	16.5	16.5
NOL12	50980309	UTP15	14|19	16.5	0	0	0	0	0	16.5	16.5
NOL12	29789283	WDR75	17|16	16.5	0	0	0	0	0	16.5	16.5
NOL12	7019419	GNL2	15|19	17	0	0	0	0	0	17	17
NOL12	50053872	RPL7L1	16|18	17	0	0	0	0	0	17	17
NOL12	16933546	RPLP0	19|15	17	0	0	0	0	0	17	17
NOL12	4504505	HSD17B4	17|18	17.5	0	0	0	0	0	17.5	17.5
NOL12	21361468	NOL11	17|18	17.5	0	0	0	0	0	17.5	17.5
NOL12	15431288	RPL10A	18|17	17.5	0	0	0	0	0	17.5	17.5
NOL12	82659083	STAU1	19|16	17.5	0	0	0	0	0	17.5	17.5
NOL12	217330644	WDR12	17|18	17.5	0	0	0	0	0	17.5	17.5
NOL12	109948283	KIAA0020	20|16	18	0	0	0	0	0	18	18
NOL12	55956788	NCL	23|19	21	3	0	0	0	3	18	18
NOL12	18644728	NOL6	16|20	18	0	0	0	0	0	18	18
NOL12	38683855	PTCD3	19|17	18	0	0	0	0	0	18	18
NOL12	9506931	DDX56	18|19	18.5	0	0	0	0	0	18.5	18.5
NOL12	186928854	MRPS31	18|19	18.5	0	0	0	0	0	18.5	18.5
NOL12	13904866	RPL28	20|17	18.5	0	0	0	0	0	18.5	18.5
NOL12	4506695	RPS19	26|15	20.5	0	0	0	2	2	18.5	18.5
NOL12	20336290	DHX30	18|20	19	0	0	0	0	0	19	19
NOL12	237649012	EBNA1BP2	19|19	19	0	0	0	0	0	19	19
NOL12	4503483	EEF2	29|33	31	12	0	5	7	12	19	19
NOL12	4506741	RPS7	22|24	23	4	0	0	0	4	19	19
NOL12	4503571	ENO1	20|23	21.5	2	0	2	2	2	19.5	19.5
NOL12	313569768	RPL17	22|21	21.5	2	0	0	0	2	19.5	19.5
NOL12	222352111	NIFK	20|20	20	0	0	0	0	0	20	20
NOL12	15431301	RPL7	23|25	24	3	0	2	4	4	20	20
NOL12	7706254	NOP58	21|21	21	0	0	0	0	0	21	21
NOL12	225543215	MKI67	16|27	21.5	0	0	0	0	0	21.5	21.5
NOL12	30581135	SMC1A	22|21	21.5	0	0	0	0	0	21.5	21.5
NOL12	12056465	FBL	22|22	22	0	0	0	0	0	22	22
NOL12	157694511	NOC2L	22|22	22	0	0	0	0	0	22	22
NOL12	15431295	RPL13	25|23	24	2	0	0	0	2	22	22
NOL12	16579885	RPL4	29|27	28	6	2	0	4	6	22	22
NOL12	21361348	UTP14A	21|23	22	0	0	0	0	0	22	22
NOL12	57863269	RRP1B	23|22	22.5	0	0	0	0	0	22.5	22.5
NOL12	32483374	NOP56	20|26	23	0	0	0	0	0	23	23
NOL12	4503247	RRP1	24|22	23	0	0	0	0	0	23	23
NOL12	223278379	RRP12	19|27	23	0	0	0	0	0	23	23
NOL12	14591909	RPL5	26|21	23.5	0	0	0	0	0	23.5	23.5
NOL12	4506723	RPS3A	24|23	23.5	0	0	0	0	0	23.5	23.5
NOL12	19913369	TBL3	22|26	24	0	0	0	0	0	24	24
NOL12	217272892	EFTUD2	32|33	32.5	7	2	0	3	7	25.5	25.5
NOL12	4506725	RPS4X	30|28	29	3	0	0	2	3	26	26
NOL12	5803221	WDR3	28|24	26	0	0	0	0	0	26	26
NOL12	55770900	BRIX1	25|28	26.5	0	0	0	0	0	26.5	26.5
NOL12	10835063	NPM1	29|34	31.5	4	0	0	2	4	27.5	27.5
NOL12	120587023	UTP20	24|33	28.5	0	0	0	0	0	28.5	28.5
NOL12	41872631	FASN	42|38	40	11	3	3	10	11	29	29
NOL12	62241042	EPRS	28|31	29.5	0	0	0	0	0	29.5	29.5
NOL12	21327667	BOP1	31|29	30	0	0	0	0	0	30	30
NOL12	20806097	NOC3L	31|30	30.5	0	0	0	0	0	30.5	30.5
NOL12	16753227	RPL6	35|36	35.5	5	0	0	3	5	30.5	30.5
NOL12	21281677	WDR36	31|30	30.5	0	0	0	0	0	30.5	30.5
NOL12	42542392	CEBPZ	25|37	31	0	0	0	0	0	31	31
NOL12	224593278	DDX27	29|33	31	0	0	0	0	0	31	31
NOL12	126032350	PRKDC	33|38	35.5	4	0	0	2	4	31.5	31.5
NOL12	224589071	BMS1	29|35	32	0	0	0	0	0	32	32
NOL12	38327634	DDX18	24|40	32	0	0	0	0	0	32	32
NOL12	45593130	GNL3	32|32	32	0	0	0	0	0	32	32
NOL12	164419743	DDX54	30|35	32.5	0	0	0	0	0	32.5	32.5
NOL12	4885399	SMC3	29|36	32.5	0	0	0	0	0	32.5	32.5
NOL12	91208426	PRPF8	44|52	48	14	4	5	10	14	34	34
NOL12	14719402	RRS1	31|39	35	0	0	0	0	0	35	35
NOL12	385198059	NOP2	38|36	37	0	0	0	0	0	37	37
NOL12	4506649	RPL3	39|36	37.5	0	0	0	0	0	37.5	37.5
NOL12	221316723	NAT10	36|40	38	0	0	0	0	0	38	38
NOL12	7657455	PES1	36|41	38.5	0	0	0	0	0	38.5	38.5
NOL12	224028244	NONO	42|45	43.5	3	0	0	2	3	40.5	40.5
NOL12	4826998	SFPQ	51|42	46.5	3	2	0	0	3	43.5	43.5
NOL12	40217847	SNRNP200	55|54	54.5	9	0	2	11	11	43.5	43.5
NOL12	100913206	DHX9	54|50	52	6	0	0	0	6	46	46
NOL12	194097365	FTSJ3	53|42	47.5	0	0	0	0	0	47.5	47.5
NOL12	14141152	HNRNPM	55|53	54	6	0	0	3	6	48	48
NOL12	379317177	DDX21	46|61	53.5	3	0	0	0	3	50.5	50.5
NOL12	73695475	HEATR1	56|63	59.5	0	0	0	0	0	59.5	59.5
NOL12	55953087	GTPBP4	61|60	60.5	0	0	0	0	0	60.5	60.5
NOL12	118498359	RSL1D1	59|64	61.5	0	0	0	0	0	61.5	61.5
NOL12	70980549	PDCD11	58|69	63.5	0	0	0	0	0	63.5	63.5
NOL12	157694492	MYBBP1A	76|72	74	2	0	0	0	2	72	72

## Sheet: Table S1b
Nol12 pullout condition: 100 mM NaCl with RNAse A
Nol12	13236553		28|35	31.5	0	0	0	0	0	31.5	31.5
Bait	GI number	PreyGene	total spectral count (TSC) of sample duplicate	Average TSC (avgTSC)	flp-in #1 background TSC (bgTSC)	flp-in #2 background TSC (bgTSC)	PrA #1 background TSC (bgTSC)	PrA #2 background TSC (bgTSC)	highest bgTSC (hbgTSC)	avgTSC - hbgTSC	avgTSC - hbgTSC that are >= 2 TSC
NOL12	29788785	TUBB	11|11	11	9	0	5	8	9	2	2
NOL12	4885375	HIST1H1C	4|10	7	0	0	2	5	5	2	2
NOL12	151301228	PRPF40A	8|8	8	4	2	6	5	6	2	2
NOL12	14043072	HNRNPA2B1	7|3	5	3	0	3	2	3	2	2
NOL12	5031973	PDIA6	7|3	5	0	0	2	3	3	2	2
NOL12	10440560	HIST1H3F	6|4	5	0	0	2	3	3	2	2
NOL12	59859885	RPSA	3|5	4	0	0	2	0	2	2	2
NOL12	238859597	RBM34	0|4	2	0	0	0	0	0	2	2
NOL12	28460688	TXLNA	4|0	2	0	0	0	0	0	2	2
NOL12	5031571	ACTR2	2|2	2	0	0	0	0	0	2	2
NOL12	4502049	AKR1B1	2|2	2	0	0	0	0	0	2	2
NOL12	4757834	BAG2	2|2	2	0	0	0	0	0	2	2
NOL12	4502599	CBR1	2|2	2	0	0	0	0	0	2	2
NOL12	19923969	CCDC124	2|2	2	0	0	0	0	0	2	2
NOL12	40018640	CDC73	2|2	2	0	0	0	0	0	2	2
NOL12	20149530	CSNK1D	2|2	2	0	0	0	0	0	2	2
NOL12	4503097	CSNK2A2	2|2	2	0	0	0	0	0	2	2
NOL12	256773275	DDX28	2|2	2	0	0	0	0	0	2	2
NOL12	17505907	DDX31	2|2	2	0	0	0	0	0	2	2
NOL12	208431827	EIF2AK2	2|2	2	0	0	0	0	0	2	2
NOL12	10801345	EIF3K	2|2	2	0	0	0	0	0	2	2
NOL12	84043963	EIF5B	2|2	2	0	0	0	0	0	2	2
NOL12	52630440	FKBP8	2|2	2	0	0	0	0	0	2	2
NOL12	4885281	GLUD1	2|2	2	0	0	0	0	0	2	2
NOL12	11055998	GNB4	2|2	2	0	0	0	0	0	2	2
NOL12	237820620	GRWD1	2|2	2	0	0	0	0	0	2	2
NOL12	25092737	HIST1H2AA	2|2	2	0	0	0	0	0	2	2
NOL12	8922794	IMP3	2|2	2	0	0	0	0	0	2	2
NOL12	7705425	MRPS17	2|2	2	0	0	0	0	0	2	2
NOL12	14028877	MRPS25	2|2	2	0	0	0	0	0	2	2
NOL12	193211616	NIPSNAP1	2|2	2	0	0	0	0	0	2	2
NOL12	34147513	RAB7A	2|2	2	0	0	0	0	0	2	2
NOL12	67782311	SKIV2L	2|2	2	0	0	0	0	0	2	2
NOL12	21389315	SLC25A1	2|2	2	0	0	0	0	0	2	2
NOL12	194363758	SRP9	2|2	2	0	0	0	0	0	2	2
NOL12	21361091	UCHL1	2|2	2	0	0	0	0	0	2	2
NOL12	9966799	UTP3	2|2	2	0	0	0	0	0	2	2
NOL12	157743245	WDR43	2|2	2	0	0	0	0	0	2	2
NOL12	21536286	CKB	12|11	11.5	2	3	9	6	9	2.5	2.5
NOL12	117938251	BCLAF1	5|6	5.5	0	0	3	0	3	2.5	2.5
NOL12	23308577	PHGDH	6|5	5.5	0	2	3	3	3	2.5	2.5
NOL12	171906589	BCKDK	0|5	2.5	0	0	0	0	0	2.5	2.5
NOL12	57634536	LARP4B	0|5	2.5	0	0	0	0	0	2.5	2.5
NOL12	103472005	MKI67	0|5	2.5	0	0	0	0	0	2.5	2.5
NOL12	14211540	MOV10	0|5	2.5	0	0	0	0	0	2.5	2.5
NOL12	31317305	MPHOSPH10	0|5	2.5	0	0	0	0	0	2.5	2.5
NOL12	190194365	MTPAP	0|5	2.5	0	0	0	0	0	2.5	2.5
NOL12	294832006	PPP2R2A	0|5	2.5	0	0	0	0	0	2.5	2.5
NOL12	38149981	SNRPB2	0|5	2.5	0	0	0	0	0	2.5	2.5
NOL12	4506341	ABCD3	2|3	2.5	0	0	0	0	0	2.5	2.5
NOL12	7019319	ABT1	3|2	2.5	0	0	0	0	0	2.5	2.5
NOL12	8922701	AGK	2|3	2.5	0	0	0	0	0	2.5	2.5
NOL12	215490009	AIMP1	2|3	2.5	0	0	0	0	0	2.5	2.5
NOL12	38683807	ANKRD17	3|2	2.5	0	0	0	0	0	2.5	2.5
NOL12	15011974	ARHGEF2	2|3	2.5	0	0	0	0	0	2.5	2.5
NOL12	48255945	ATP2B1	2|3	2.5	0	0	0	0	0	2.5	2.5
NOL12	171543895	ATXN2	2|3	2.5	0	0	0	0	0	2.5	2.5
NOL12	4502981	COX4I1	3|2	2.5	0	0	0	0	0	2.5	2.5
NOL12	148491070	CTPS1	2|3	2.5	0	0	0	0	0	2.5	2.5
NOL12	193794826	CYB5R3	2|3	2.5	0	0	0	0	0	2.5	2.5
NOL12	4503363	DPM1	2|3	2.5	0	0	0	0	0	2.5	2.5
NOL12	4758796	DRG1	2|3	2.5	0	0	0	0	0	2.5	2.5
NOL12	4758862	EEF1E1	3|2	2.5	0	0	0	0	0	2.5	2.5
NOL12	372266127	FLII	2|3	2.5	0	0	0	0	0	2.5	2.5
NOL12	38327039	HSPA4	3|2	2.5	0	0	0	0	0	2.5	2.5
NOL12	30795212	IGF2BP3	3|2	2.5	0	0	0	0	0	2.5	2.5
NOL12	62460637	IPO4	2|3	2.5	0	0	0	0	0	2.5	2.5
NOL12	37595750	LBR	2|3	2.5	0	0	0	0	0	2.5	2.5
NOL12	223468571	MRPL23	3|2	2.5	0	0	0	0	0	2.5	2.5
NOL12	16554604	MRPS23	3|2	2.5	0	0	0	0	0	2.5	2.5
NOL12	15809016	MYL12B	3|2	2.5	0	0	0	0	0	2.5	2.5
NOL12	17986258	MYL6	3|2	2.5	0	0	0	0	0	2.5	2.5
NOL12	6681764	NDUFA9	2|3	2.5	0	0	0	0	0	2.5	2.5
NOL12	10835073	NMT1	2|3	2.5	0	0	0	0	0	2.5	2.5
NOL12	28212272	NOP9	3|2	2.5	0	0	0	0	0	2.5	2.5
NOL12	27477134	NUP210	3|2	2.5	0	0	0	0	0	2.5	2.5
NOL12	24431950	PRPF4	2|3	2.5	0	0	0	0	0	2.5	2.5
NOL12	109240550	PSPC1	3|2	2.5	0	0	0	0	0	2.5	2.5
NOL12	21361454	PYCR2	2|3	2.5	0	0	0	0	0	2.5	2.5
NOL12	354459354	RAP1B	3|2	2.5	0	0	0	0	0	2.5	2.5
NOL12	325651836	SMARCA5	2|3	2.5	0	0	0	0	0	2.5	2.5
NOL12	110347418	SMC2	2|3	2.5	0	0	0	0	0	2.5	2.5
NOL12	148839305	SMCHD1	2|3	2.5	0	0	0	0	0	2.5	2.5
NOL12	33188447	SRPK2	3|2	2.5	0	0	0	0	0	2.5	2.5
NOL12	16905517	SRSF10	3|2	2.5	0	0	0	0	0	2.5	2.5
NOL12	148727341	STRAP	3|2	2.5	0	0	0	0	0	2.5	2.5
NOL12	22749415	STT3A	2|3	2.5	0	0	0	0	0	2.5	2.5
NOL12	7549793	TBL2	3|2	2.5	0	0	0	0	0	2.5	2.5
NOL12	125656165	THOC2	3|2	2.5	0	0	0	0	0	2.5	2.5
NOL12	155722983	TRAP1	2|3	2.5	0	0	0	0	0	2.5	2.5
NOL12	281182404	TXLNG	2|3	2.5	0	0	0	0	0	2.5	2.5
NOL12	197333811	URB2	3|2	2.5	0	0	0	0	0	2.5	2.5
NOL12	50980309	UTP15	2|3	2.5	0	0	0	0	0	2.5	2.5
NOL12	5454158	VARS	2|3	2.5	0	0	0	0	0	2.5	2.5
NOL12	7657381	PRPF19	16|10	13	10	4	7	9	10	3	3
NOL12	4501885	ACTB	8|14	11	0	5	0	8	8	3	3
NOL12	14165435	HNRNPK	5|7	6	3	2	3	3	3	3	3
NOL12	283436222	ATAD3A	6|6	6	0	0	3	0	3	3	3
NOL12	18375623	DDX39B	4|6	5	0	0	0	2	2	3	3
NOL12	4503659	FAU	5|5	5	0	0	0	2	2	3	3
NOL12	16117787	RPL34	5|5	5	0	0	2	0	2	3	3
NOL12	21361368	ALDH18A1	2|4	3	0	0	0	0	0	3	3
NOL12	251831110	COX2	4|2	3	0	0	0	0	0	3	3
NOL12	29570791	CSNK2A1	2|4	3	0	0	0	0	0	3	3
NOL12	91199540	DLD	4|2	3	0	0	0	0	0	3	3
NOL12	23397429	EIF3M	4|2	3	0	0	0	0	0	3	3
NOL12	17402904	EXOSC6	2|4	3	0	0	0	0	0	3	3
NOL12	73486658	GOT2	2|4	3	0	0	0	0	0	3	3
NOL12	15991827	HK1	4|2	3	0	0	0	0	0	3	3
NOL12	5730027	KHDRBS1	2|4	3	0	0	0	0	0	3	3
NOL12	4504897	KPNA2	4|2	3	0	0	0	0	0	3	3
NOL12	22748747	LSM12	4|2	3	0	0	0	0	0	3	3
NOL12	186928852	MRPS7	2|4	3	0	0	0	0	0	3	3
NOL12	7661532	NOB1	4|2	3	0	0	0	0	0	3	3
NOL12	23110944	PSMA6	2|4	3	0	0	0	0	0	3	3
NOL12	325301072	SSR4	2|4	3	0	0	0	0	0	3	3
NOL12	168229248	ASNS	3|3	3	0	0	0	0	0	3	3
NOL12	13129104	CCDC86	3|3	3	0	0	0	0	0	3	3
NOL12	186928847	CIRH1A	3|3	3	0	0	0	0	0	3	3
NOL12	18644734	CTNNBL1	3|3	3	0	0	0	0	0	3	3
NOL12	116805788	CYFIP2	3|3	3	0	0	0	0	0	3	3
NOL12	31415882	EXOSC8	3|3	3	0	0	0	0	0	3	3
NOL12	124028525	FARSB	3|3	3	0	0	0	0	0	3	3
NOL12	16554611	MRPS15	3|3	3	0	0	0	0	0	3	3
NOL12	21327708	NAP1L1	3|3	3	0	0	0	0	0	3	3
NOL12	20070220	PRMT5	3|3	3	0	0	0	0	0	3	3
NOL12	150418007	RANBP2	3|3	3	0	0	0	0	0	3	3
NOL12	215490089	SAP18	3|3	3	0	0	0	0	0	3	3
NOL12	112382250	SPTBN1	3|3	3	0	0	0	0	0	3	3
NOL12	19557691	SURF4	3|3	3	0	0	0	0	0	3	3
NOL12	21361348	UTP14A	3|3	3	0	0	0	0	0	3	3
NOL12	4507943	XPO1	3|3	3	0	0	0	0	0	3	3
NOL12	34147630	TUFM	9|8	8.5	4	0	4	5	5	3.5	3.5
NOL12	4505773	PHB	7|6	6.5	0	3	3	3	3	3.5	3.5
NOL12	4502491	C1QBP	5|6	5.5	0	0	2	0	2	3.5	3.5
NOL12	124494254	PA2G4	6|5	5.5	0	0	2	0	2	3.5	3.5
NOL12	117168248	PTPLAD1	5|6	5.5	0	0	0	2	2	3.5	3.5
NOL12	10334859	CKMT1B	2|5	3.5	0	0	0	0	0	3.5	3.5
NOL12	29029601	DHX37	5|2	3.5	0	0	0	0	0	3.5	3.5
NOL12	124494238	MYO1C	2|5	3.5	0	0	0	0	0	3.5	3.5
NOL12	51100974	MYO1D	2|5	3.5	0	0	0	0	0	3.5	3.5
NOL12	11321601	PFKP	5|2	3.5	0	0	0	0	0	3.5	3.5
NOL12	21361399	PPP2R1A	5|2	3.5	0	0	0	0	0	3.5	3.5
NOL12	38202255	TARS	2|5	3.5	0	0	0	0	0	3.5	3.5
NOL12	7657198	DIMT1	3|4	3.5	0	0	0	0	0	3.5	3.5
NOL12	6598323	GDI2	3|4	3.5	0	0	0	0	0	3.5	3.5
NOL12	109948283	KIAA0020	4|3	3.5	0	0	0	0	0	3.5	3.5
NOL12	24308207	LRRC47	4|3	3.5	0	0	0	0	0	3.5	3.5
NOL12	149999606	MOGS	4|3	3.5	0	0	0	0	0	3.5	3.5
NOL12	7662645	MRPS18B	3|4	3.5	0	0	0	0	0	3.5	3.5
NOL12	7705805	MRPS2	4|3	3.5	0	0	0	0	0	3.5	3.5
NOL12	17149828	NAA15	3|4	3.5	0	0	0	0	0	3.5	3.5
NOL12	32483374	NOP56	4|3	3.5	0	0	0	0	0	3.5	3.5
NOL12	4557809	OAT	4|3	3.5	0	0	0	0	0	3.5	3.5
NOL12	20070125	P4HB	4|3	3.5	0	0	0	0	0	3.5	3.5
NOL12	4505753	PGAM1	4|3	3.5	0	0	0	0	0	3.5	3.5
NOL12	33356174	PNN	4|3	3.5	0	0	0	0	0	3.5	3.5
NOL12	4505941	POLR2B	3|4	3.5	0	0	0	0	0	3.5	3.5
NOL12	350276247	PPP1CC	3|4	3.5	0	0	0	0	0	3.5	3.5
NOL12	25777612	PSMD3	4|3	3.5	0	0	0	0	0	3.5	3.5
NOL12	157426877	RCL1	4|3	3.5	0	0	0	0	0	3.5	3.5
NOL12	57863269	RRP1B	3|4	3.5	0	0	0	0	0	3.5	3.5
NOL12	23308697	SRPR	3|4	3.5	0	0	0	0	0	3.5	3.5
NOL12	4507241	SSRP1	4|3	3.5	0	0	0	0	0	3.5	3.5
NOL12	6005757	SUPT16H	4|3	3.5	0	0	0	0	0	3.5	3.5
NOL12	120587023	UTP20	3|4	3.5	0	0	0	0	0	3.5	3.5
NOL12	5803225	YWHAE	3|4	3.5	0	0	0	0	0	3.5	3.5
NOL12	4507677	HSP90B1	7|9	8	0	0	4	0	4	4	4
NOL12	221307584	PHB2	7|9	8	0	0	4	0	4	4	4
NOL12	4503481	EEF1G	8|6	7	2	0	3	0	3	4	4
NOL12	4506707	RPS25	8|6	7	0	2	3	0	3	4	4
NOL12	4885079	ATP5C1	7|7	7	0	0	3	0	3	4	4
NOL12	226246671	RPS20	7|5	6	0	0	0	2	2	4	4
NOL12	50593002	SNRPA1	7|5	6	2	0	2	0	2	4	4
NOL12	4506613	RPL22	6|6	6	2	0	2	2	2	4	4
NOL12	21361114	SLC25A11	6|6	6	0	0	0	2	2	4	4
NOL12	22202629	AIFM1	5|3	4	0	0	0	0	0	4	4
NOL12	10716563	CANX	3|5	4	0	0	0	0	0	4	4
NOL12	4504511	DNAJA1	3|5	4	0	0	0	0	0	4	4
NOL12	205360838	DNAJA3	5|3	4	0	0	0	0	0	4	4
NOL12	33188463	MRPS9	5|3	4	0	0	0	0	0	4	4
NOL12	5453549	PRDX4	3|5	4	0	0	0	0	0	4	4
NOL12	25777602	PSMD2	5|3	4	0	0	0	0	0	4	4
NOL12	4506629	RPL29	5|3	4	0	0	0	0	0	4	4
NOL12	19557702	SURF6	5|3	4	0	0	0	0	0	4	4
NOL12	14210536	TUBB6	5|3	4	0	0	0	0	0	4	4
NOL12	208879465	VDAC3	5|3	4	0	0	0	0	0	4	4
NOL12	4502201	ARF1	4|4	4	0	0	0	0	0	4	4
NOL12	20070130	BTF3	4|4	4	0	0	0	0	0	4	4
NOL12	38327625	CS	4|4	4	0	0	0	0	0	4	4
NOL12	9506689	EXOSC4	4|4	4	0	0	0	0	0	4	4
NOL12	31543091	MAK16	4|4	4	0	0	0	0	0	4	4
NOL12	4505763	PGK1	4|4	4	0	0	0	0	0	4	4
NOL12	4506439	RBBP7	4|4	4	0	0	0	0	0	4	4
NOL12	23618867	SFXN1	4|4	4	0	0	0	0	0	4	4
NOL12	29789283	WDR75	4|4	4	0	0	0	0	0	4	4
NOL12	33946297	ZNF326	4|4	4	0	0	0	0	0	4	4
NOL12	20149594	HSP90AB1	19|16	17.5	2	4	13	12	13	4.5	4.5
NOL12	41327771	DDX23	11|12	11.5	0	0	4	7	7	4.5	4.5
NOL12	124256496	HSPA1L	9|0	4.5	0	0	0	0	0	4.5	4.5
NOL12	10863927	PPIA	9|8	8.5	0	0	4	3	4	4.5	4.5
NOL12	5174735	TUBB4B	6|9	7.5	0	0	3	3	3	4.5	4.5
NOL12	4506701	RPS23	8|5	6.5	2	0	0	0	2	4.5	4.5
NOL12	209862831	ANXA2	3|6	4.5	0	0	0	0	0	4.5	4.5
NOL12	24497435	PSMC5	3|6	4.5	0	0	0	0	0	4.5	4.5
NOL12	4506651	RPL36AL	3|6	4.5	0	0	0	0	0	4.5	4.5
NOL12	4502303	ATP5O	5|4	4.5	0	0	0	0	0	4.5	4.5
NOL12	42542392	CEBPZ	5|4	4.5	0	0	0	0	0	4.5	4.5
NOL12	5031635	CFL1	5|4	4.5	0	0	0	0	0	4.5	4.5
NOL12	70995211	ECH1	4|5	4.5	0	0	0	0	0	4.5	4.5
NOL12	4503523	EIF3D	5|4	4.5	0	0	0	0	0	4.5	4.5
NOL12	4503513	EIF3I	5|4	4.5	0	0	0	0	0	4.5	4.5
NOL12	38202257	GANAB	4|5	4.5	0	0	0	0	0	4.5	4.5
NOL12	20336746	H2AFY	4|5	4.5	0	0	0	0	0	4.5	4.5
NOL12	4504483	HPRT1	5|4	4.5	0	0	0	0	0	4.5	4.5
NOL12	24797086	IPO5	4|5	4.5	0	0	0	0	0	4.5	4.5
NOL12	16950603	MRPS35	5|4	4.5	0	0	0	0	0	4.5	4.5
NOL12	194328685	MYO1B	4|5	4.5	0	0	0	0	0	4.5	4.5
NOL12	18644728	NOL6	5|4	4.5	0	0	0	0	0	4.5	4.5
NOL12	55769587	NOP14	4|5	4.5	0	0	0	0	0	4.5	4.5
NOL12	126362983	RRP15	4|5	4.5	0	0	0	0	0	4.5	4.5
NOL12	5730023	RUVBL2	5|4	4.5	0	0	0	0	0	4.5	4.5
NOL12	157671927	SPATA5	5|4	4.5	0	0	0	0	0	4.5	4.5
NOL12	118344456	UTP18	4|5	4.5	0	0	0	0	0	4.5	4.5
NOL12	296317337	VDAC2	5|4	4.5	0	0	0	0	0	4.5	4.5
NOL12	52632383	HNRNPL	11|9	10	3	0	5	4	5	5	5
NOL12	16507237	HSPA5	7|9	8	2	0	3	3	3	5	5
NOL12	5454064	RBM14	5|9	7	2	0	0	0	2	5	5
NOL12	194272210	KARS	8|6	7	0	0	0	2	2	5	5
NOL12	15149476	RARS	6|8	7	0	0	0	2	2	5	5
NOL12	19923315	SHMT2	8|6	7	0	0	2	0	2	5	5
NOL12	20070197	DDOST	7|3	5	0	0	0	0	0	5	5
NOL12	20149629	DDX47	3|7	5	0	0	0	0	0	5	5
NOL12	153791492	EIF3CL	7|3	5	0	0	0	0	0	5	5
NOL12	10947135	ABCF1	6|4	5	0	0	0	0	0	5	5
NOL12	4503507	EIF2S3	6|4	5	0	0	0	0	0	5	5
NOL12	4503519	EIF3F	4|6	5	0	0	0	0	0	5	5
NOL12	259013556	FXR2	4|6	5	0	0	0	0	0	5	5
NOL12	229577436	SPATA5L1	4|6	5	0	0	0	0	0	5	5
NOL12	38569505	DDX52	5|5	5	0	0	0	0	0	5	5
NOL12	283046701	LARP4	5|5	5	0	0	0	0	0	5	5
NOL12	14043022	MARS	5|5	5	0	0	0	0	0	5	5
NOL12	21265040	MRPL22	5|5	5	0	0	0	0	0	5	5
NOL12	24475816	TECR	5|5	5	0	0	0	0	0	5	5
NOL12	10863889	SART1	4|13	8.5	2	0	3	2	3	5.5	5.5
NOL12	21735621	MDH2	10|7	8.5	0	0	3	3	3	5.5	5.5
NOL12	24638454	ATP2A2	4|7	5.5	0	0	0	0	0	5.5	5.5
NOL12	19920317	CKAP4	7|4	5.5	0	0	0	0	0	5.5	5.5
NOL12	38327552	G3BP1	4|7	5.5	0	0	0	0	0	5.5	5.5
NOL12	14150124	LLPH	7|4	5.5	0	0	0	0	0	5.5	5.5
NOL12	115298682	PRRC2C	4|7	5.5	0	0	0	0	0	5.5	5.5
NOL12	4503515	EIF3H	6|5	5.5	0	0	0	0	0	5.5	5.5
NOL12	7661920	EIF4A3	6|5	5.5	0	0	0	0	0	5.5	5.5
NOL12	189083688	EXOSC7	5|6	5.5	0	0	0	0	0	5.5	5.5
NOL12	4504327	HADHB	5|6	5.5	0	0	0	0	0	5.5	5.5
NOL12	4506787	IQGAP1	6|5	5.5	0	0	0	0	0	5.5	5.5
NOL12	224591430	LYAR	6|5	5.5	0	0	0	0	0	5.5	5.5
NOL12	62234461	NLE1	5|6	5.5	0	0	0	0	0	5.5	5.5
NOL12	7662677	NSA2	6|5	5.5	0	0	0	0	0	5.5	5.5
NOL12	55769546	PAK1IP1	6|5	5.5	0	0	0	0	0	5.5	5.5
NOL12	21361657	PDIA3	6|5	5.5	0	0	0	0	0	5.5	5.5
NOL12	209413738	RPN2	6|5	5.5	0	0	0	0	0	5.5	5.5
NOL12	4506711	RPS27	6|5	5.5	0	0	0	0	0	5.5	5.5
NOL12	48526509	TIMM50	5|6	5.5	0	0	0	0	0	5.5	5.5
NOL12	38455427	CCT4	11|11	11	0	0	3	5	5	6	6
NOL12	57863257	TCP1	10|10	10	0	0	4	2	4	6	6
NOL12	261399877	CCT7	9|9	9	0	0	3	2	3	6	6
NOL12	61097912	NOM1	3|9	6	0	0	0	0	0	6	6
NOL12	4502643	CCT6A	8|8	8	0	0	0	2	2	6	6
NOL12	19913406	TOP2A	4|8	6	0	0	0	0	0	6	6
NOL12	9966805	DDX24	5|7	6	0	0	0	0	0	6	6
NOL12	145580615	KRI1	5|7	6	0	0	0	0	0	6	6
NOL12	4503247	RRP1	5|7	6	0	0	0	0	0	6	6
NOL12	269847874	YTHDC2	7|5	6	0	0	0	0	0	6	6
NOL12	4503521	EIF3E	6|6	6	0	0	0	0	0	6	6
NOL12	117676403	KRR1	6|6	6	0	0	0	0	0	6	6
NOL12	40254924	LRRC59	6|6	6	0	0	0	0	0	6	6
NOL12	14269586	MRPS26	6|6	6	0	0	0	0	0	6	6
NOL12	186928850	MRPS27	6|6	6	0	0	0	0	0	6	6
NOL12	4506675	RPN1	6|6	6	0	0	0	0	0	6	6
NOL12	237649019	SLC25A13	6|6	6	0	0	0	0	0	6	6
NOL12	48762932	CCT8	14|9	11.5	0	2	5	4	5	6.5	6.5
NOL12	24234688	HSPA9	8|11	9.5	2	0	3	2	3	6.5	6.5
NOL12	4506609	RPL19	11|8	9.5	2	0	3	0	3	6.5	6.5
NOL12	5031755	HNRNPR	8|5	6.5	0	0	0	0	0	6.5	6.5
NOL12	10047140	PNO1	5|8	6.5	0	0	0	0	0	6.5	6.5
NOL12	153791300	SDAD1	5|8	6.5	0	0	0	0	0	6.5	6.5
NOL12	119220605	USP10	5|8	6.5	0	0	0	0	0	6.5	6.5
NOL12	16905526	DAP3	6|7	6.5	0	0	0	0	0	6.5	6.5
NOL12	39777586	DHX57	6|7	6.5	0	0	0	0	0	6.5	6.5
NOL12	31563378	EIF6	7|6	6.5	0	0	0	0	0	6.5	6.5
NOL12	5174447	GNB2L1	7|6	6.5	0	0	0	0	0	6.5	6.5
NOL12	73695475	HEATR1	6|7	6.5	0	0	0	0	0	6.5	6.5
NOL12	110825982	HERC5	7|6	6.5	0	0	0	0	0	6.5	6.5
NOL12	13027604	MRPS34	7|6	6.5	0	0	0	0	0	6.5	6.5
NOL12	223555917	MTDH	6|7	6.5	0	0	0	0	0	6.5	6.5
NOL12	4506625	RPL27A	6|7	6.5	0	0	0	0	0	6.5	6.5
NOL12	5729877	HSPA8	16|18	17	7	3	10	9	10	7	7
NOL12	11415030	HIST1H4J	17|15	16	4	2	9	7	9	7	7
NOL12	382546007	ATP5A1	16|12	14	3	5	7	6	7	7	7
NOL12	15431290	RPL11	8|12	10	2	0	2	3	3	7	7
NOL12	4506619	RPL24	11|7	9	0	0	2	0	2	7	7
NOL12	109452587	FAM98B	5|9	7	0	0	0	0	0	7	7
NOL12	187960109	RBM28	5|9	7	0	0	0	0	0	7	7
NOL12	56237027	IGF2BP1	6|8	7	0	0	0	0	0	7	7
NOL12	66392203	NME1-NME2	8|6	7	0	0	0	0	0	7	7
NOL12	171460958	NOL10	8|6	7	0	0	0	0	0	7	7
NOL12	4507879	VDAC1	8|6	7	0	0	0	0	0	7	7
NOL12	20127454	ATIC	7|7	7	0	0	0	0	0	7	7
NOL12	45439306	DARS	7|7	7	0	0	0	0	0	7	7
NOL12	7705437	NIP7	7|7	7	0	0	0	0	0	7	7
NOL12	21396480	RALY	7|7	7	0	0	0	0	0	7	7
NOL12	47419936	SRPK1	7|7	7	0	0	0	0	0	7	7
NOL12	24234747	ILF2	11|12	11.5	0	0	3	4	4	7.5	7.5
NOL12	337756501	MTHFD1L	11|10	10.5	2	0	3	0	3	7.5	7.5
NOL12	106879206	C14orf169	6|9	7.5	0	0	0	0	0	7.5	7.5
NOL12	339275831	EIF3L	6|9	7.5	0	0	0	0	0	7.5	7.5
NOL12	9910244	MRPS22	6|9	7.5	0	0	0	0	0	7.5	7.5
NOL12	21327667	BOP1	7|8	7.5	0	0	0	0	0	7.5	7.5
NOL12	41327779	DDX55	7|8	7.5	0	0	0	0	0	7.5	7.5
NOL12	61835148	FXR1	8|7	7.5	0	0	0	0	0	7.5	7.5
NOL12	260099723	LDHA	7|8	7.5	0	0	0	0	0	7.5	7.5
NOL12	21361875	LTV1	8|7	7.5	0	0	0	0	0	7.5	7.5
NOL12	186928854	MRPS31	8|7	7.5	0	0	0	0	0	7.5	7.5
NOL12	18490987	MRTO4	8|7	7.5	0	0	0	0	0	7.5	7.5
NOL12	222352111	NIFK	7|8	7.5	0	0	0	0	0	7.5	7.5
NOL12	281604136	PGAM5	8|7	7.5	0	0	0	0	0	7.5	7.5
NOL12	205277463	TKT	8|7	7.5	0	0	0	0	0	7.5	7.5
NOL12	194394141	URB1	7|8	7.5	0	0	0	0	0	7.5	7.5
NOL12	217330644	WDR12	7|8	7.5	0	0	0	0	0	7.5	7.5
NOL12	4506645	RPL38	16|14	15	7	0	6	7	7	8	8
NOL12	40807485	PRPF6	11|13	12	2	3	2	4	4	8	8
NOL12	6005860	RPL35	11|9	10	0	0	0	2	2	8	8
NOL12	30581135	SMC1A	6|10	8	0	0	0	0	0	8	8
NOL12	301171467	DDX3X	9|7	8	0	0	0	0	0	8	8
NOL12	209869993	GART	9|7	8	0	0	0	0	0	8	8
NOL12	157694511	NOC2L	7|9	8	0	0	0	0	0	8	8
NOL12	50053872	RPL7L1	9|7	8	0	0	0	0	0	8	8
NOL12	441478305	QARS	8|8	8	0	0	0	0	0	8	8
NOL12	4506753	RUVBL1	8|8	8	0	0	0	0	0	8	8
NOL12	291575128	LDHB	13|12	12.5	0	2	4	2	4	8.5	8.5
NOL12	76880486	ASCC3	5|12	8.5	0	0	0	0	0	8.5	8.5
NOL12	21361181	ATP1A1	11|10	10.5	0	0	2	0	2	8.5	8.5
NOL12	51173724	BYSL	6|11	8.5	0	0	0	0	0	8.5	8.5
NOL12	7657013	AATF	7|10	8.5	0	0	0	0	0	8.5	8.5
NOL12	302699237	EIF4G1	7|10	8.5	0	0	0	0	0	8.5	8.5
NOL12	13129068	NOC4L	7|10	8.5	0	0	0	0	0	8.5	8.5
NOL12	310923196	PPAN-P2RY11	10|7	8.5	0	0	0	0	0	8.5	8.5
NOL12	11415026	RPL18A	7|10	8.5	0	0	0	0	0	8.5	8.5
NOL12	29648305	ZCCHC3	7|10	8.5	0	0	0	0	0	8.5	8.5
NOL12	21361794	CAND1	9|8	8.5	0	0	0	0	0	8.5	8.5
NOL12	13514831	DDX10	8|9	8.5	0	0	0	0	0	8.5	8.5
NOL12	215982791	MYO5A	8|9	8.5	0	0	0	0	0	8.5	8.5
NOL12	4505775	SLC25A3	8|9	8.5	0	0	0	0	0	8.5	8.5
NOL12	4506681	RPS11	12|10	11	2	0	0	2	2	9	9
NOL12	297374779	FMR1	7|11	9	0	0	0	0	0	9	9
NOL12	39930469	RPF2	11|7	9	0	0	0	0	0	9	9
NOL12	9951915	AHCY	8|10	9	0	0	0	0	0	9	9
NOL12	12056465	FBL	10|8	9	0	0	0	0	0	9	9
NOL12	15431288	RPL10A	8|10	9	0	0	0	0	0	9	9
NOL12	10863945	XRCC5	8|10	9	0	0	0	0	0	9	9
NOL12	94721239	IARS	9|9	9	0	0	0	0	0	9	9
NOL12	7706254	NOP58	9|9	9	0	0	0	0	0	9	9
NOL12	14141161	HNRNPU	16|21	18.5	9	0	8	9	9	9.5	9.5
NOL12	5453603	CCT2	17|20	18.5	0	0	9	4	9	9.5	9.5
NOL12	212549553	ILF3	13|18	15.5	0	3	6	6	6	9.5	9.5
NOL12	12025678	ACTN4	13|14	13.5	0	0	4	2	4	9.5	9.5
NOL12	24307939	CCT5	14|13	13.5	0	0	3	4	4	9.5	9.5
NOL12	82659083	STAU1	6|13	9.5	0	0	0	0	0	9.5	9.5
NOL12	380692328	DDX56	8|11	9.5	0	0	0	0	0	9.5	9.5
NOL12	33239445	EIF3B	11|8	9.5	0	0	0	0	0	9.5	9.5
NOL12	148536853	COPA	9|10	9.5	0	0	0	0	0	9.5	9.5
NOL12	148747209	NOP16	10|9	9.5	0	0	0	0	0	9.5	9.5
NOL12	48762926	PWP2	9|10	9.5	0	0	0	0	0	9.5	9.5
NOL12	16117794	RPL36	10|9	9.5	0	0	0	0	0	9.5	9.5
NOL12	376319199	USP39	10|9	9.5	0	0	0	0	0	9.5	9.5
NOL12	38569421	ACLY	14|12	13	0	0	3	0	3	10	10
NOL12	4503529	EIF4A1	12|12	12	0	2	0	0	2	10	10
NOL12	10947137	ABCF2	9|11	10	0	0	0	0	0	10	10
NOL12	296317324	GNL3L	10|10	10	0	0	0	0	0	10	10
NOL12	312284072	RPS17L	12|17	14.5	0	0	4	0	4	10.5	10.5
NOL12	11968182	RPS18	14|17	15.5	4	2	4	5	5	10.5	10.5
NOL12	10800138	HIST1H2BD	13|14	13.5	3	0	0	2	3	10.5	10.5
NOL12	5032051	RPS14	14|13	13.5	3	0	0	0	3	10.5	10.5
NOL12	365192532	MYH10	8|13	10.5	0	0	0	0	0	10.5	10.5
NOL12	56699482	FAM98A	9|12	10.5	0	0	0	0	0	10.5	10.5
NOL12	4504733	IRS4	9|12	10.5	0	0	0	0	0	10.5	10.5
NOL12	78000181	RPL14	9|12	10.5	0	0	0	0	0	10.5	10.5
NOL12	21361499	SENP3	9|12	10.5	0	0	0	0	0	10.5	10.5
NOL12	19923403	EXOSC2	10|11	10.5	0	0	0	0	0	10.5	10.5
NOL12	4885399	SMC3	11|10	10.5	0	0	0	0	0	10.5	10.5
NOL12	23510338	UBA1	11|10	10.5	0	0	0	0	0	10.5	10.5
NOL12	6005942	VCP	11|10	10.5	0	0	0	0	0	10.5	10.5
NOL12	32189394	ATP5B	17|19	18	0	2	7	2	7	11	11
NOL12	223890243	RPL10	16|12	14	3	0	3	0	3	11	11
NOL12	10835063	NPM1	15|15	15	0	0	4	2	4	11	11
NOL12	19913369	TBL3	13|9	11	0	0	0	0	0	11	11
NOL12	40217805	NOL9	10|12	11	0	0	0	0	0	11	11
NOL12	208431833	PABPC4	10|12	11	0	0	0	0	0	11	11
NOL12	56243583	WDR18	12|10	11	0	0	0	0	0	11	11
NOL12	5803221	WDR3	12|10	11	0	0	0	0	0	11	11
NOL12	148746199	RPL31	14|13	13.5	2	0	2	2	2	11.5	11.5
NOL12	224593278	DDX27	10|13	11.5	0	0	0	0	0	11.5	11.5
NOL12	38683855	PTCD3	10|13	11.5	0	0	0	0	0	11.5	11.5
NOL12	16117791	RPL35A	13|10	11.5	0	0	0	0	0	11.5	11.5
NOL12	19923142	KPNB1	11|12	11.5	0	0	0	0	0	11.5	11.5
NOL12	21626466	MATR3	17|23	20	5	0	4	8	8	12	12
NOL12	193794814	ALDOA	15|13	14	0	0	2	0	2	12	12
NOL12	27262645	ATXN2L	9|15	12	0	0	0	0	0	12	12
NOL12	108773810	LARS	15|9	12	0	0	0	0	0	12	12
NOL12	67782362	DHX29	11|13	12	0	0	0	0	0	12	12
NOL12	239787829	GLTSCR2	13|11	12	0	0	0	0	0	12	12
NOL12	237649012	EBNA1BP2	12|12	12	0	0	0	0	0	12	12
NOL12	378404908	GAPDH	25|20	22.5	2	3	10	6	10	12.5	12.5
NOL12	117189975	HNRNPC	14|23	18.5	2	0	4	6	6	12.5	12.5
NOL12	14165469	RPS15A	17|18	17.5	5	3	5	3	5	12.5	12.5
NOL12	4506621	RPL26	16|15	15.5	0	0	0	3	3	12.5	12.5
NOL12	15011936	RPS26	14|15	14.5	0	0	0	2	2	12.5	12.5
NOL12	4505917	EXOSC10	11|14	12.5	0	0	0	0	0	12.5	12.5
NOL12	153792590	HSP90AA1	23|23	23	5	0	10	8	10	13	13
NOL12	62241042	EPRS	15|11	13	0	0	0	0	0	13	13
NOL12	13904866	RPL28	12|14	13	0	0	0	0	0	13	13
NOL12	4506631	RPL30	12|14	13	0	0	0	0	0	13	13
NOL12	7019419	GNL2	13|13	13	0	0	0	0	0	13	13
NOL12	301601658	ADAR	12|15	13.5	0	0	0	0	0	13.5	13.5
NOL12	7657455	PES1	12|15	13.5	0	0	0	0	0	13.5	13.5
NOL12	116063573	FLNA	13|14	13.5	0	0	0	0	0	13.5	13.5
NOL12	4506607	RPL18	13|14	13.5	0	0	0	0	0	13.5	13.5
NOL12	167466173	HSPA1B	27|25	26	7	5	12	8	12	14	14
NOL12	14141152	HNRNPM	21|19	20	4	3	2	6	6	14	14
NOL12	4506671	RPLP2	15|21	18	0	0	4	2	4	14	14
NOL12	13654270	LAS1L	16|12	14	0	0	0	0	0	14	14
NOL12	55770900	BRIX1	15|13	14	0	0	0	0	0	14	14
NOL12	4506687	RPS15	15|13	14	0	0	0	0	0	14	14
NOL12	13904870	RPS5	13|15	14	0	0	0	0	0	14	14
NOL12	18201905	GPI	14|14	14	0	0	0	0	0	14	14
NOL12	4504505	HSD17B4	14|14	14	0	0	0	0	0	14	14
NOL12	4503841	XRCC6	14|14	14	0	0	0	0	0	14	14
NOL12	4506597	RPL12	10|19	14.5	0	0	0	0	0	14.5	14.5
NOL12	4506623	RPL27	19|16	17.5	2	0	2	3	3	14.5	14.5
NOL12	54607053	GCN1L1	17|12	14.5	0	0	0	0	0	14.5	14.5
NOL12	20806097	NOC3L	13|16	14.5	0	0	0	0	0	14.5	14.5
NOL12	224589071	BMS1	15|14	14.5	0	0	0	0	0	14.5	14.5
NOL12	12667788	MYH9	14|15	14.5	0	0	0	0	0	14.5	14.5
NOL12	45643123	NVL	14|15	14.5	0	0	0	0	0	14.5	14.5
NOL12	14916501	RPS24	14|15	14.5	0	0	0	0	0	14.5	14.5
NOL12	193211480	SKIV2L2	14|15	14.5	0	0	0	0	0	14.5	14.5
NOL12	39780588	TSR1	14|15	14.5	0	0	0	0	0	14.5	14.5
NOL12	332164775	PKM	27|25	26	2	0	11	10	11	15	15
NOL12	20127408	HADHA	16|14	15	0	0	0	0	0	15	15
NOL12	70980549	PDCD11	15|15	15	0	0	0	0	0	15	15
NOL12	66346679	SERBP1	15|15	15	0	0	0	0	0	15	15
NOL12	77404397	SND1	13|18	15.5	0	0	0	0	0	15.5	15.5
NOL12	38327634	DDX18	16|15	15.5	0	0	0	0	0	15.5	15.5
NOL12	217272892	EFTUD2	34|34	34	12	3	15	18	18	16	16
NOL12	31542947	HSPD1	21|21	21	2	4	5	4	5	16	16
NOL12	51094101	DDX54	18|14	16	0	0	0	0	0	16	16
NOL12	14591909	RPL5	14|18	16	0	0	0	0	0	16	16
NOL12	15431306	RPL8	18|14	16	0	0	0	0	0	16	16
NOL12	32698730	NUFIP2	16|16	16	0	0	0	0	0	16	16
NOL12	21281677	WDR36	16|16	16	0	0	0	0	0	16	16
NOL12	222136639	MTHFD1	16|17	16.5	0	0	0	0	0	16.5	16.5
NOL12	39725634	LARP1	16|18	17	0	0	0	0	0	17	17
NOL12	4506643	RPL37A	18|16	17	0	0	0	0	0	17	17
NOL12	148613856	DDX17	19|24	21.5	2	0	4	3	4	17.5	17.5
NOL12	4506695	RPS19	22|21	21.5	2	0	4	4	4	17.5	17.5
NOL12	4506635	RPL32	21|14	17.5	0	0	0	0	0	17.5	17.5
NOL12	156523968	PARP1	15|20	17.5	0	0	0	0	0	17.5	17.5
NOL12	14719402	RRS1	15|21	18	0	0	0	0	0	18	18
NOL12	109638749	SRP72	16|20	18	0	0	0	0	0	18	18
NOL12	24497620	SRP68	17|19	18	0	0	0	0	0	18	18
NOL12	385198059	NOP2	18|18	18	0	0	0	0	0	18	18
NOL12	4506661	RPL7A	22|23	22.5	4	0	3	2	4	18.5	18.5
NOL12	155030232	PELP1	16|21	18.5	0	0	0	0	0	18.5	18.5
NOL12	13129006	DDX50	19|18	18.5	0	0	0	0	0	18.5	18.5
NOL12	4503571	ENO1	28|25	26.5	0	0	7	4	7	19.5	19.5
NOL12	4758012	CLTC	17|22	19.5	0	0	0	0	0	19.5	19.5
NOL12	15431293	RPL15	21|22	21.5	0	0	2	0	2	19.5	19.5
NOL12	24415404	MDN1	18|21	19.5	0	0	0	0	0	19.5	19.5
NOL12	15431303	RPL9	21|29	25	4	0	5	3	5	20	20
NOL12	4506743	RPS8	25|23	24	3	0	3	4	4	20	20
NOL12	18104948	RPL21	18|22	20	0	0	0	0	0	20	20
NOL12	57013276	TUBA1B	42|0	21	0	0	0	0	0	21	21
NOL12	4506691	RPS16	23|28	25.5	3	0	2	4	4	21.5	21.5
NOL12	118498359	RSL1D1	21|23	22	0	0	0	0	0	22	22
NOL12	258645150	RBMX	21|28	24.5	2	0	2	2	2	22.5	22.5
NOL12	46367787	PABPC1	20|25	22.5	0	0	0	0	0	22.5	22.5
NOL12	7706322	C14orf166	21|24	22.5	0	0	0	0	0	22.5	22.5
NOL12	223278379	RRP12	22|25	23.5	0	0	0	0	0	23.5	23.5
NOL12	4506605	RPL23	25|29	27	0	0	2	3	3	24	24
NOL12	45593130	GNL3	25|23	24	0	0	0	0	0	24	24
NOL12	14141193	RPS9	28|31	29.5	4	3	5	5	5	24.5	24.5
NOL12	33350932	DYNC1H1	27|23	25	0	0	0	0	0	25	25
NOL12	17105394	RPL23A	27|23	25	0	0	0	0	0	25	25
NOL12	4503509	EIF3A	24|26	25	0	0	0	0	0	25	25
NOL12	221316723	NAT10	24|26	25	0	0	0	0	0	25	25
NOL12	112421122	DNAJC13	25|26	25.5	0	0	0	0	0	25.5	25.5
NOL12	4758138	DDX5	26|34	30	4	2	4	3	4	26	26
NOL12	15431301	RPL7	28|34	31	3	2	5	5	5	26	26
NOL12	16933546	RPLP0	23|31	27	0	0	0	0	0	27	27
NOL12	7657015	RTCB	28|26	27	0	0	0	0	0	27	27
NOL12	15718687	RPS3	34|37	35.5	7	5	8	7	8	27.5	27.5
NOL12	157694492	MYBBP1A	27|28	27.5	0	0	0	0	0	27.5	27.5
NOL12	4506741	RPS7	30|36	33	3	0	5	5	5	28	28
NOL12	194097365	FTSJ3	27|30	28.5	0	0	0	0	0	28.5	28.5
NOL12	4506725	RPS4X	33|40	36.5	6	3	7	5	7	29.5	29.5
NOL12	15055539	RPS2	33|39	36	3	0	5	6	6	30	30
NOL12	4503483	EEF2	45|37	41	2	0	10	9	10	31	31
NOL12	239787838	TEX10	32|30	31	0	0	0	0	0	31	31
NOL12	16579885	RPL4	36|37	36.5	2	0	5	5	5	31.5	31.5
NOL12	17158044	RPS6	32|37	34.5	0	0	3	0	3	31.5	31.5
NOL12	20336290	DHX30	27|36	31.5	0	0	0	0	0	31.5	31.5
NOL12	395132450	RPL13A	38|33	35.5	0	0	3	2	3	32.5	32.5
NOL12	16753227	RPL6	38|38	38	4	0	5	4	5	33	33
NOL12	322303127	RPS10	34|38	36	2	0	3	3	3	33	33
NOL12	313569768	RPL17	34|40	37	2	0	3	3	3	34	34
NOL12	4506723	RPS3A	40|41	40.5	3	0	6	3	6	34.5	34.5
NOL12	4506685	RPS13	35|43	39	3	2	4	4	4	35	35
NOL12	91208426	PRPF8	65|68	66.5	28	16	30	31	31	35.5	35.5
NOL12	40217847	SNRNP200	67|78	72.5	28	13	35	33	35	37.5	37.5
NOL12	55953087	GTPBP4	38|37	37.5	0	0	0	0	0	37.5	37.5
NOL12	15431295	RPL13	33|49	41	0	0	3	2	3	38	38
NOL12	100913206	DHX9	55|55	55	10	4	15	11	15	40	40
NOL12	41872631	FASN	53|52	52.5	6	2	11	11	11	41.5	41.5
NOL12	50659095	DDX21	38|46	42	0	0	0	0	0	42	42
NOL12	4826686	DDX1	41|44	42.5	0	0	0	0	0	42.5	42.5
NOL12	224028244	NONO	52|54	53	10	3	9	9	10	43	43
NOL12	13654237	PRKDC	41|51	46	0	0	3	3	3	43	43
NOL12	4826998	SFPQ	60|54	57	7	3	13	10	13	44	44
NOL12	4506649	RPL3	46|48	47	0	0	0	3	3	44	44

## Sheet: Table S1c
Nol12 pullout condition: 300 mM NaCl with RNAse A
Nol12	13236553		37|29	33	1	0	1	1	1	32	32
Bait	GI number	PreyGene	total spectral count (TSC) of sample duplicate	Average TSC (avgTSC)	flp-in #1 background TSC (bgTSC)	flp-in #2 background TSC (bgTSC)	PrA #1 background TSC (bgTSC)	PrA #2 background TSC (bgTSC)	highest bgTSC (hbgTSC)	avgTSC - hbgTSC	avgTSC - hbgTSC that are >= 2 TSC
NOL12	156071459	SLC25A5	5|5	5	0	3	0	0	3	2	2
NOL12	38201714	ELAVL1	4|4	4	0	2	0	0	2	2	2
NOL12	207452735	EPPK1	0|4	2	0	0	0	0	0	2	2
NOL12	124028525	FARSB	4|0	2	0	0	0	0	0	2	2
NOL12	4504327	HADHB	0|4	2	0	0	0	0	0	2	2
NOL12	38045913	NME1	4|0	2	0	0	0	0	0	2	2
NOL12	55769587	NOP14	4|0	2	0	0	0	0	0	2	2
NOL12	119220557	PAICS	0|4	2	0	0	0	0	0	2	2
NOL12	21361399	PPP2R1A	0|4	2	0	0	0	0	0	2	2
NOL12	4506641	RPL37	4|0	2	0	0	0	0	0	2	2
NOL12	12758125	RRP8	4|0	2	0	0	0	0	0	2	2
NOL12	11225260	TOP1	0|4	2	0	0	0	0	0	2	2
NOL12	14210536	TUBB6	0|4	2	0	0	0	0	0	2	2
NOL12	51173724	BYSL	2|2	2	0	0	0	0	0	2	2
NOL12	24432106	CCAR2	2|2	2	0	0	0	0	0	2	2
NOL12	21735415	CENPB	2|2	2	0	0	0	0	0	2	2
NOL12	68299795	CHD1	2|2	2	0	0	0	0	0	2	2
NOL12	17505907	DDX31	2|2	2	0	0	0	0	0	2	2
NOL12	39777586	DHX57	2|2	2	0	0	0	0	0	2	2
NOL12	4504511	DNAJA1	2|2	2	0	0	0	0	0	2	2
NOL12	205360838	DNAJA3	2|2	2	0	0	0	0	0	2	2
NOL12	194328699	EMG1	2|2	2	0	0	0	0	0	2	2
NOL12	169646441	GDI2	2|2	2	0	0	0	0	0	2	2
NOL12	118402586	GLO1	2|2	2	0	0	0	0	0	2	2
NOL12	73486658	GOT2	2|2	2	0	0	0	0	0	2	2
NOL12	237820620	GRWD1	2|2	2	0	0	0	0	0	2	2
NOL12	110825982	HERC5	2|2	2	0	0	0	0	0	2	2
NOL12	15991827	HK1	2|2	2	0	0	0	0	0	2	2
NOL12	56676330	HP1BP3	2|2	2	0	0	0	0	0	2	2
NOL12	24797086	IPO5	2|2	2	0	0	0	0	0	2	2
NOL12	4504897	KPNA2	2|2	2	0	0	0	0	0	2	2
NOL12	40254924	LRRC59	2|2	2	0	0	0	0	0	2	2
NOL12	394582093	MCM3	2|2	2	0	0	0	0	0	2	2
NOL12	23510448	MCM5	2|2	2	0	0	0	0	0	2	2
NOL12	21265080	MRPL18	2|2	2	0	0	0	0	0	2	2
NOL12	22547136	MRPL4	2|2	2	0	0	0	0	0	2	2
NOL12	7705626	MRPS16	2|2	2	0	0	0	0	0	2	2
NOL12	13994257	MRPS21	2|2	2	0	0	0	0	0	2	2
NOL12	20070125	P4HB	2|2	2	0	0	0	0	0	2	2
NOL12	4758304	PDIA4	2|2	2	0	0	0	0	0	2	2
NOL12	25777602	PSMD2	2|2	2	0	0	0	0	0	2	2
NOL12	4506741	RPS7	2|2	2	0	0	0	0	0	2	2
NOL12	10937869	SMN2	2|2	2	0	0	0	0	0	2	2
NOL12	109633019	WHSC1	2|2	2	0	0	0	0	0	2	2
NOL12	5174735	TUBB4B	3|8	5.5	0	3	0	0	3	2.5	2.5
NOL12	14165469	RPS15A	6|7	6.5	4	4	0	0	4	2.5	2.5
NOL12	14670392	BAZ1B	0|5	2.5	0	0	0	0	0	2.5	2.5
NOL12	66392203	NME1-NME2	0|5	2.5	0	0	0	0	0	2.5	2.5
NOL12	11321601	PFKP	5|0	2.5	0	0	0	0	0	2.5	2.5
NOL12	23308577	PHGDH	5|4	4.5	0	2	0	0	2	2.5	2.5
NOL12	32189392	PRDX2	4|5	4.5	0	2	0	2	2	2.5	2.5
NOL12	325651836	SMARCA5	0|5	2.5	0	0	0	0	0	2.5	2.5
NOL12	18860916	XRN2	0|5	2.5	0	0	0	0	0	2.5	2.5
NOL12	168229248	ASNS	2|3	2.5	0	0	0	0	0	2.5	2.5
NOL12	193794826	CYB5R3	2|3	2.5	0	0	0	0	0	2.5	2.5
NOL12	20149629	DDX47	3|2	2.5	0	0	0	0	0	2.5	2.5
NOL12	7661920	EIF4A3	2|3	2.5	0	0	0	0	0	2.5	2.5
NOL12	40556376	GLYR1	3|2	2.5	0	0	0	0	0	2.5	2.5
NOL12	4885375	HIST1H1C	2|3	2.5	0	0	0	0	0	2.5	2.5
NOL12	10440560	HIST1H3F	3|2	2.5	0	0	0	0	0	2.5	2.5
NOL12	66933016	IMPDH2	2|3	2.5	0	0	0	0	0	2.5	2.5
NOL12	12597661	MRPL44	2|3	2.5	0	0	0	0	0	2.5	2.5
NOL12	16554604	MRPS23	3|2	2.5	0	0	0	0	0	2.5	2.5
NOL12	14028877	MRPS25	2|3	2.5	0	0	0	0	0	2.5	2.5
NOL12	13994259	MRPS5	3|2	2.5	0	0	0	0	0	2.5	2.5
NOL12	186928852	MRPS7	3|2	2.5	0	0	0	0	0	2.5	2.5
NOL12	13569843	NOL7	2|3	2.5	0	0	0	0	0	2.5	2.5
NOL12	301336155	NSUN2	2|3	2.5	0	0	0	0	0	2.5	2.5
NOL12	24430149	NUP155	3|2	2.5	0	0	0	0	0	2.5	2.5
NOL12	4505763	PGK1	2|3	2.5	0	0	0	0	0	2.5	2.5
NOL12	15149476	RARS	2|3	2.5	0	0	0	0	0	2.5	2.5
NOL12	4506613	RPL22	3|2	2.5	0	0	0	0	0	2.5	2.5
NOL12	345197228	TRA2B	2|3	2.5	0	0	0	0	0	2.5	2.5
NOL12	21361091	UCHL1	3|2	2.5	0	0	0	0	0	2.5	2.5
NOL12	156415994	UTP11L	2|3	2.5	0	0	0	0	0	2.5	2.5
NOL12	381342476	HNRNPH1	9|7	8	5	5	0	3	5	3	3
NOL12	4506619	RPL24	8|4	6	0	3	0	0	3	3	3
NOL12	54112117	SF3B1	8|8	8	2	5	0	2	5	3	3
NOL12	4885079	ATP5C1	4|6	5	0	2	0	0	2	3	3
NOL12	18375623	DDX39B	6|4	5	0	2	0	0	2	3	3
NOL12	5803225	YWHAE	0|6	3	0	0	0	0	0	3	3
NOL12	21361794	CAND1	4|2	3	0	0	0	0	0	3	3
NOL12	4502643	CCT6A	2|4	3	0	0	0	0	0	3	3
NOL12	4758024	COIL	4|2	3	0	0	0	0	0	3	3
NOL12	20070197	DDOST	2|4	3	0	0	0	0	0	3	3
NOL12	4503509	EIF3A	2|4	3	0	0	0	0	0	3	3
NOL12	54607053	GCN1L1	4|2	3	0	0	0	0	0	3	3
NOL12	38327039	HSPA4	4|2	3	0	0	0	0	0	3	3
NOL12	223468571	MRPL23	4|2	3	0	0	0	0	0	3	3
NOL12	124494238	MYO1C	2|4	3	0	0	0	0	0	3	3
NOL12	61097912	NOM1	2|4	3	0	0	0	0	0	3	3
NOL12	21361657	PDIA3	4|2	3	0	0	0	0	0	3	3
NOL12	4505753	PGAM1	2|4	3	0	0	0	0	0	3	3
NOL12	209413738	RPN2	2|4	3	0	0	0	0	0	3	3
NOL12	193211480	SKIV2L2	4|2	3	0	0	0	0	0	3	3
NOL12	42542379	SRRM1	2|4	3	0	0	0	0	0	3	3
NOL12	40217790	ZNF512	4|2	3	0	0	0	0	0	3	3
NOL12	4503481	EEF1G	3|3	3	0	0	0	0	0	3	3
NOL12	4557553	EMD	3|3	3	0	0	0	0	0	3	3
NOL12	4758504	HSD17B10	3|3	3	0	0	0	0	0	3	3
NOL12	56237027	IGF2BP1	3|3	3	0	0	0	0	0	3	3
NOL12	33469968	MCM7	3|3	3	0	0	0	0	0	3	3
NOL12	7661806	MRPL15	3|3	3	0	0	0	0	0	3	3
NOL12	31652226	MRPL21	3|3	3	0	0	0	0	0	3	3
NOL12	22035588	MRPL24	3|3	3	0	0	0	0	0	3	3
NOL12	169636418	MRPL38	3|3	3	0	0	0	0	0	3	3
NOL12	21327708	NAP1L1	3|3	3	0	0	0	0	0	3	3
NOL12	256222019	RAB10	3|3	3	0	0	0	0	0	3	3
NOL12	23618867	SFXN1	3|3	3	0	0	0	0	0	3	3
NOL12	77404397	SND1	3|3	3	0	0	0	0	0	3	3
NOL12	120587023	UTP20	3|3	3	0	0	0	0	0	3	3
NOL12	296317337	VDAC2	3|3	3	0	0	0	0	0	3	3
NOL12	208879465	VDAC3	3|3	3	0	0	0	0	0	3	3
NOL12	38327642	WDR55	3|3	3	0	0	0	0	0	3	3
NOL12	166235167	ZBTB11	3|3	3	0	0	0	0	0	3	3
NOL12	7662408	ZFP30	3|3	3	0	0	0	0	0	3	3
NOL12	24234747	ILF2	7|4	5.5	0	2	0	0	2	3.5	3.5
NOL12	34996489	PHIP	0|7	3.5	0	0	0	0	0	3.5	3.5
NOL12	320461711	PRDX1	6|7	6.5	2	3	2	3	3	3.5	3.5
NOL12	148470397	HNRNPF	6|5	5.5	0	2	0	0	2	3.5	3.5
NOL12	221307584	PHB2	6|5	5.5	0	0	0	2	2	3.5	3.5
NOL12	4505917	EXOSC10	5|2	3.5	0	0	0	0	0	3.5	3.5
NOL12	20336746	H2AFY	2|5	3.5	0	0	0	0	0	3.5	3.5
NOL12	94721239	IARS	2|5	3.5	0	0	0	0	0	3.5	3.5
NOL12	16554611	MRPS15	5|2	3.5	0	0	0	0	0	3.5	3.5
NOL12	4504191	MSH6	2|5	3.5	0	0	0	0	0	3.5	3.5
NOL12	59859885	RPSA	5|2	3.5	0	0	0	0	0	3.5	3.5
NOL12	19913408	TOP2B	5|2	3.5	0	0	0	0	0	3.5	3.5
NOL12	52632383	HNRNPL	4|3	3.5	0	0	0	0	0	3.5	3.5
NOL12	4504483	HPRT1	3|4	3.5	0	0	0	0	0	3.5	3.5
NOL12	14043022	MARS	3|4	3.5	0	0	0	0	0	3.5	3.5
NOL12	33356547	MCM2	3|4	3.5	0	0	0	0	0	3.5	3.5
NOL12	31317305	MPHOSPH10	3|4	3.5	0	0	0	0	0	3.5	3.5
NOL12	16554607	MRPS10	3|4	3.5	0	0	0	0	0	3.5	3.5
NOL12	7662645	MRPS18B	3|4	3.5	0	0	0	0	0	3.5	3.5
NOL12	16950603	MRPS35	4|3	3.5	0	0	0	0	0	3.5	3.5
NOL12	291084505	NKRF	3|4	3.5	0	0	0	0	0	3.5	3.5
NOL12	4557809	OAT	3|4	3.5	0	0	0	0	0	3.5	3.5
NOL12	4506439	RBBP7	4|3	3.5	0	0	0	0	0	3.5	3.5
NOL12	4506629	RPL29	4|3	3.5	0	0	0	0	0	3.5	3.5
NOL12	192807312	SMARCA4	4|3	3.5	0	0	0	0	0	3.5	3.5
NOL12	29568103	SNRNP70	4|3	3.5	0	0	0	0	0	3.5	3.5
NOL12	73760405	TMPO	4|3	3.5	0	0	0	0	0	3.5	3.5
NOL12	15718687	RPS3	9|9	9	3	5	0	4	5	4	4
NOL12	4506645	RPL38	8|6	7	2	3	2	2	3	4	4
NOL12	111038128	NGDN	2|6	4	0	0	0	0	0	4	4
NOL12	4758638	PRDX6	2|6	4	0	0	0	0	0	4	4
NOL12	11968182	RPS18	6|6	6	0	2	0	2	2	4	4
NOL12	21361114	SLC25A11	2|6	4	0	0	0	0	0	4	4
NOL12	5032179	TRIM28	6|6	6	0	2	0	0	2	4	4
NOL12	116063573	FLNA	3|5	4	0	0	0	0	0	4	4
NOL12	38202257	GANAB	5|3	4	0	0	0	0	0	4	4
NOL12	14269586	MRPS26	3|5	4	0	0	0	0	0	4	4
NOL12	229577436	SPATA5L1	3|5	4	0	0	0	0	0	4	4
NOL12	228008291	SYNCRIP	3|5	4	0	0	0	0	0	4	4
NOL12	51599156	CHD4	4|4	4	0	0	0	0	0	4	4
NOL12	33239445	EIF3B	4|4	4	0	0	0	0	0	4	4
NOL12	5174447	GNB2L1	4|4	4	0	0	0	0	0	4	4
NOL12	8922794	IMP3	4|4	4	0	0	0	0	0	4	4
NOL12	26051231	LACTB	4|4	4	0	0	0	0	0	4	4
NOL12	157426877	RCL1	4|4	4	0	0	0	0	0	4	4
NOL12	312284072	RPS17L	4|4	4	0	0	0	0	0	4	4
NOL12	4505775	SLC25A3	4|4	4	0	0	0	0	0	4	4
NOL12	6005942	VCP	4|4	4	0	0	0	0	0	4	4
NOL12	91208426	PRPF8	18|23	20.5	9	16	6	5	16	4.5	4.5
NOL12	217272892	EFTUD2	11|10	10.5	4	6	2	2	6	4.5	4.5
NOL12	11415030	HIST1H4J	11|10	10.5	6	4	5	3	6	4.5	4.5
NOL12	16507237	HSPA5	8|9	8.5	0	4	0	2	4	4.5	4.5
NOL12	15431290	RPL11	7|6	6.5	2	2	0	0	2	4.5	4.5
NOL12	16117787	RPL34	6|7	6.5	0	2	0	0	2	4.5	4.5
NOL12	209869993	GART	6|3	4.5	0	0	0	0	0	4.5	4.5
NOL12	14211540	MOV10	6|3	4.5	0	0	0	0	0	4.5	4.5
NOL12	38569421	ACLY	4|5	4.5	0	0	0	0	0	4.5	4.5
NOL12	153791492	EIF3CL	5|4	4.5	0	0	0	0	0	4.5	4.5
NOL12	15529982	IMP4	5|4	4.5	0	0	0	0	0	4.5	4.5
NOL12	7705805	MRPS2	5|4	4.5	0	0	0	0	0	4.5	4.5
NOL12	33188463	MRPS9	4|5	4.5	0	0	0	0	0	4.5	4.5
NOL12	222136639	MTHFD1	5|4	4.5	0	0	0	0	0	4.5	4.5
NOL12	194328685	MYO1B	4|5	4.5	0	0	0	0	0	4.5	4.5
NOL12	18644728	NOL6	5|4	4.5	0	0	0	0	0	4.5	4.5
NOL12	117168248	PTPLAD1	4|5	4.5	0	0	0	0	0	4.5	4.5
NOL12	205277463	TKT	4|5	4.5	0	0	0	0	0	4.5	4.5
NOL12	29788768	TUBB2B	4|5	4.5	0	0	0	0	0	4.5	4.5
NOL12	382546007	ATP5A1	10|12	11	3	6	0	5	6	5	5
NOL12	10800138	HIST1H2BD	3|11	7	2	2	0	0	2	5	5
NOL12	4758138	DDX5	8|10	9	0	4	0	2	4	5	5
NOL12	32189394	ATP5B	9|9	9	0	4	0	0	4	5	5
NOL12	10863927	PPIA	7|7	7	0	2	0	2	2	5	5
NOL12	4506675	RPN1	3|7	5	0	0	0	0	0	5	5
NOL12	4502201	ARF1	6|4	5	0	0	0	0	0	5	5
NOL12	14150124	LLPH	6|4	5	0	0	0	0	0	5	5
NOL12	124494254	PA2G4	4|6	5	0	0	0	0	0	5	5
NOL12	4506651	RPL36AL	4|6	5	0	0	0	0	0	5	5
NOL12	5730023	RUVBL2	6|4	5	0	0	0	0	0	5	5
NOL12	20127454	ATIC	5|5	5	0	0	0	0	0	5	5
NOL12	229892270	DCAF13	5|5	5	0	0	0	0	0	5	5
NOL12	215599015	DKC1	5|5	5	0	0	0	0	0	5	5
NOL12	4504733	IRS4	5|5	5	0	0	0	0	0	5	5
NOL12	13027604	MRPS34	5|5	5	0	0	0	0	0	5	5
NOL12	4506707	RPS25	5|5	5	0	0	0	0	0	5	5
NOL12	291575128	LDHB	10|11	10.5	0	5	2	3	5	5.5	5.5
NOL12	48762932	CCT8	7|8	7.5	0	2	0	2	2	5.5	5.5
NOL12	5032051	RPS14	8|3	5.5	0	0	0	0	0	5.5	5.5
NOL12	4506701	RPS23	8|7	7.5	2	2	0	0	2	5.5	5.5
NOL12	21735621	MDH2	7|4	5.5	0	0	0	0	0	5.5	5.5
NOL12	10863945	XRCC5	4|7	5.5	0	0	0	0	0	5.5	5.5
NOL12	301601658	ADAR	6|5	5.5	0	0	0	0	0	5.5	5.5
NOL12	283436222	ATAD3A	5|6	5.5	0	0	0	0	0	5.5	5.5
NOL12	148536853	COPA	5|6	5.5	0	0	0	0	0	5.5	5.5
NOL12	4507677	HSP90B1	6|5	5.5	0	0	0	0	0	5.5	5.5
NOL12	21396480	RALY	6|5	5.5	0	0	0	0	0	5.5	5.5
NOL12	21361499	SENP3	6|5	5.5	0	0	0	0	0	5.5	5.5
NOL12	21040326	SON	6|5	5.5	0	0	0	0	0	5.5	5.5
NOL12	38202255	TARS	6|5	5.5	0	0	0	0	0	5.5	5.5
NOL12	33946297	ZNF326	6|5	5.5	0	0	0	0	0	5.5	5.5
NOL12	4506605	RPL23	9|9	9	0	3	0	0	3	6	6
NOL12	21361181	ATP1A1	4|8	6	0	0	0	0	0	6	6
NOL12	11067747	CDC5L	4|8	6	0	0	0	0	0	6	6
NOL12	148529014	DDB1	4|8	6	0	0	0	0	0	6	6
NOL12	260099723	LDHA	8|8	8	0	2	0	0	2	6	6
NOL12	55769546	PAK1IP1	8|4	6	0	0	0	0	0	6	6
NOL12	256818780	PAPD5	4|8	6	0	0	0	0	0	6	6
NOL12	9951915	AHCY	5|7	6	0	0	0	0	0	6	6
NOL12	261399877	CCT7	5|7	6	0	0	0	0	0	6	6
NOL12	20127408	HADHA	7|5	6	0	0	0	0	0	6	6
NOL12	13129068	NOC4L	5|7	6	0	0	0	0	0	6	6
NOL12	7657381	PRPF19	7|5	6	0	0	0	0	0	6	6
NOL12	148746199	RPL31	5|7	6	0	0	0	0	0	6	6
NOL12	4506753	RUVBL1	5|7	6	0	0	0	0	0	6	6
NOL12	57863257	TCP1	5|7	6	0	0	0	0	0	6	6
NOL12	5902034	PWP1	6|6	6	0	0	0	0	0	6	6
NOL12	223278379	RRP12	6|6	6	0	0	0	0	0	6	6
NOL12	21361348	UTP14A	6|6	6	0	0	0	0	0	6	6
NOL12	49574529	UTP6	6|6	6	0	0	0	0	0	6	6
NOL12	56243583	WDR18	6|6	6	0	0	0	0	0	6	6
NOL12	6005860	RPL35	10|7	8.5	2	0	0	0	2	6.5	6.5
NOL12	4506625	RPL27A	5|8	6.5	0	0	0	0	0	6.5	6.5
NOL12	18105007	CAD	7|6	6.5	0	0	0	0	0	6.5	6.5
NOL12	24307939	CCT5	6|7	6.5	0	0	0	0	0	6.5	6.5
NOL12	157671927	SPATA5	7|6	6.5	0	0	0	0	0	6.5	6.5
NOL12	82659083	STAU1	6|7	6.5	0	0	0	0	0	6.5	6.5
NOL12	48526509	TIMM50	6|7	6.5	0	0	0	0	0	6.5	6.5
NOL12	118344456	UTP18	7|6	6.5	0	0	0	0	0	6.5	6.5
NOL12	40217847	SNRNP200	23|35	29	7	22	4	12	22	7	7
NOL12	167466173	HSPA1B	21|21	21	6	14	6	3	14	7	7
NOL12	4506691	RPS16	12|10	11	3	4	0	2	4	7	7
NOL12	193794814	ALDOA	10|8	9	0	2	0	2	2	7	7
NOL12	256773176	WDR46	4|10	7	0	0	0	0	0	7	7
NOL12	40548332	CCDC137	6|8	7	0	0	0	0	0	7	7
NOL12	19923142	KPNB1	6|8	7	0	0	0	0	0	7	7
NOL12	12667788	MYH9	8|6	7	0	0	0	0	0	7	7
NOL12	4506687	RPS15	6|8	7	0	0	0	0	0	7	7
NOL12	157743245	WDR43	8|6	7	0	0	0	0	0	7	7
NOL12	16905526	DAP3	7|7	7	0	0	0	0	0	7	7
NOL12	54633315	DNTTIP2	7|7	7	0	0	0	0	0	7	7
NOL12	186928850	MRPS27	7|7	7	0	0	0	0	0	7	7
NOL12	4503529	EIF4A1	9|12	10.5	0	3	0	0	3	7.5	7.5
NOL12	10835063	NPM1	10|11	10.5	0	3	0	0	3	7.5	7.5
NOL12	4507879	VDAC1	6|9	7.5	0	0	0	0	0	7.5	7.5
NOL12	186928847	CIRH1A	7|8	7.5	0	0	0	0	0	7.5	7.5
NOL12	301171467	DDX3X	8|7	7.5	0	0	0	0	0	7.5	7.5
NOL12	10047102	RSL24D1	8|7	7.5	0	0	0	0	0	7.5	7.5
NOL12	4506623	RPL27	6|14	10	2	0	0	0	2	8	8
NOL12	4507241	SSRP1	4|12	8	0	0	0	0	0	8	8
NOL12	15431303	RPL9	11|9	10	0	2	0	0	2	8	8
NOL12	7706322	C14orf166	10|6	8	0	0	0	0	0	8	8
NOL12	365192532	MYH10	6|10	8	0	0	0	0	0	8	8
NOL12	4503841	XRCC6	6|10	8	0	0	0	0	0	8	8
NOL12	4502491	C1QBP	9|7	8	0	0	0	0	0	8	8
NOL12	38455427	CCT4	9|7	8	0	0	0	0	0	8	8
NOL12	186928854	MRPS31	7|9	8	0	0	0	0	0	8	8
NOL12	4506681	RPS11	9|7	8	0	0	0	0	0	8	8
NOL12	13129104	CCDC86	8|8	8	0	0	0	0	0	8	8
NOL12	106775678	HIST2H2AA4	8|8	8	0	0	0	0	0	8	8
NOL12	18201905	GPI	7|10	8.5	0	0	0	0	0	8.5	8.5
NOL12	48762926	PWP2	9|8	8.5	0	0	0	0	0	8.5	8.5
NOL12	16117794	RPL36	9|8	8.5	0	0	0	0	0	8.5	8.5
NOL12	332164775	PKM	16|22	19	3	10	0	2	10	9	9
NOL12	14141161	HNRNPU	17|15	16	5	7	3	3	7	9	9
NOL12	29570791	CSNK2A1	8|10	9	0	0	0	0	0	9	9
NOL12	12056465	FBL	10|8	9	0	0	0	0	0	9	9
NOL12	21361468	NOL11	8|10	9	0	0	0	0	0	9	9
NOL12	156523968	PARP1	8|10	9	0	0	0	0	0	9	9
NOL12	7705437	NIP7	12|7	9.5	0	0	0	0	0	9.5	9.5
NOL12	7657013	AATF	10|9	9.5	0	0	0	0	0	9.5	9.5
NOL12	5453603	CCT2	9|10	9.5	0	0	0	0	0	9.5	9.5
NOL12	13514831	DDX10	10|9	9.5	0	0	0	0	0	9.5	9.5
NOL12	24415404	MDN1	9|10	9.5	0	0	0	0	0	9.5	9.5
NOL12	5729877	HSPA8	17|19	18	3	8	0	2	8	10	10
NOL12	15011936	RPS26	10|14	12	0	2	0	0	2	10	10
NOL12	33350932	DYNC1H1	7|13	10	0	0	0	0	0	10	10
NOL12	78000181	RPL14	12|8	10	0	0	0	0	0	10	10
NOL12	7657015	RTCB	11|9	10	0	0	0	0	0	10	10
NOL12	40217805	NOL9	10|10	10	0	0	0	0	0	10	10
NOL12	153792590	HSP90AA1	18|21	19.5	0	9	4	4	9	10.5	10.5
NOL12	223890243	RPL10	15|12	13.5	3	0	0	0	3	10.5	10.5
NOL12	15055539	RPS2	12|15	13.5	0	2	0	3	3	10.5	10.5
NOL12	68509926	DHX15	9|12	10.5	0	0	0	0	0	10.5	10.5
NOL12	14916501	RPS24	9|12	10.5	0	0	0	0	0	10.5	10.5
NOL12	12025678	ACTN4	10|11	10.5	0	0	0	0	0	10.5	10.5
NOL12	9910244	MRPS22	11|10	10.5	0	0	0	0	0	10.5	10.5
NOL12	23510338	UBA1	10|11	10.5	0	0	0	0	0	10.5	10.5
NOL12	4506609	RPL19	18|12	15	4	0	0	0	4	11	11
NOL12	148613856	DDX17	9|17	13	0	0	0	2	2	11	11
NOL12	4758012	CLTC	11|15	13	0	2	0	0	2	11	11
NOL12	38683855	PTCD3	10|12	11	0	0	0	0	0	11	11
NOL12	57863269	RRP1B	12|10	11	0	0	0	0	0	11	11
NOL12	31542947	HSPD1	14|17	15.5	0	4	0	2	4	11.5	11.5
NOL12	117189975	HNRNPC	15|16	15.5	0	4	2	2	4	11.5	11.5
NOL12	50980309	UTP15	9|14	11.5	0	0	0	0	0	11.5	11.5
NOL12	4826686	DDX1	10|13	11.5	0	0	0	0	0	11.5	11.5
NOL12	221219004	WDR74	13|10	11.5	0	0	0	0	0	11.5	11.5
NOL12	212549553	ILF3	11|12	11.5	0	0	0	0	0	11.5	11.5
NOL12	4506631	RPL30	12|11	11.5	0	0	0	0	0	11.5	11.5
NOL12	7706254	NOP58	10|14	12	0	0	0	0	0	12	12
NOL12	21281677	WDR36	13|11	12	0	0	0	0	0	12	12
NOL12	31563378	EIF6	12|12	12	0	0	0	0	0	12	12
NOL12	13129006	DDX50	11|14	12.5	0	0	0	0	0	12.5	12.5
NOL12	4506621	RPL26	14|11	12.5	0	0	0	0	0	12.5	12.5
NOL12	13654270	LAS1L	12|13	12.5	0	0	0	0	0	12.5	12.5
NOL12	155030232	PELP1	12|13	12.5	0	0	0	0	0	12.5	12.5
NOL12	11415026	RPL18A	13|12	12.5	0	0	0	0	0	12.5	12.5
NOL12	19557702	SURF6	13|12	12.5	0	0	0	0	0	12.5	12.5
NOL12	29789283	WDR75	12|13	12.5	0	0	0	0	0	12.5	12.5
NOL12	4503571	ENO1	20|20	20	0	7	0	2	7	13	13
NOL12	378404908	GAPDH	18|14	16	3	3	0	2	3	13	13
NOL12	171460958	NOL10	11|15	13	0	0	0	0	0	13	13
NOL12	4506597	RPL12	11|15	13	0	0	0	0	0	13	13
NOL12	109948283	KIAA0020	12|14	13	0	0	0	0	0	13	13
NOL12	15431288	RPL10A	17|15	16	0	0	0	2	2	14	14
NOL12	62234461	NLE1	16|12	14	0	0	0	0	0	14	14
NOL12	148747209	NOP16	12|16	14	0	0	0	0	0	14	14
NOL12	19913369	TBL3	15|13	14	0	0	0	0	0	14	14
NOL12	5803221	WDR3	13|15	14	0	0	0	0	0	14	14
NOL12	4506671	RPLP2	17|16	16.5	0	2	0	2	2	14.5	14.5
NOL12	106879206	C14orf169	13|16	14.5	0	0	0	0	0	14.5	14.5
NOL12	380692328	DDX56	16|13	14.5	0	0	0	0	0	14.5	14.5
NOL12	32483374	NOP56	13|16	14.5	0	0	0	0	0	14.5	14.5
NOL12	31543091	MAK16	11|19	15	0	0	0	0	0	15	15
NOL12	4506725	RPS4X	17|18	17.5	2	2	0	0	2	15.5	15.5
NOL12	126362983	RRP15	15|16	15.5	0	0	0	0	0	15.5	15.5
NOL12	17105394	RPL23A	13|19	16	0	0	0	0	0	16	16
NOL12	239787838	TEX10	14|18	16	0	0	0	0	0	16	16
NOL12	238859597	RBM34	16|16	16	0	0	0	0	0	16	16
NOL12	18490987	MRTO4	18|15	16.5	0	0	0	0	0	16.5	16.5
NOL12	17158044	RPS6	19|21	20	0	3	0	0	3	17	17
NOL12	14591909	RPL5	14|20	17	0	0	0	0	0	17	17
NOL12	6005757	SUPT16H	14|20	17	0	0	0	0	0	17	17
NOL12	4506643	RPL37A	19|15	17	0	0	0	0	0	17	17
NOL12	7662677	NSA2	18|16	17	0	0	0	0	0	17	17
NOL12	4506607	RPL18	22|17	19.5	0	0	0	2	2	17.5	17.5
NOL12	4506743	RPS8	20|21	20.5	3	0	3	0	3	17.5	17.5
NOL12	15431293	RPL15	15|21	18	0	0	0	0	0	18	18
NOL12	224589071	BMS1	17|19	18	0	0	0	0	0	18	18
NOL12	19913406	TOP2A	19|17	18	0	0	0	0	0	18	18
NOL12	39930469	RPF2	18|18	18	0	0	0	0	0	18	18
NOL12	187960109	RBM28	18|19	18.5	0	0	0	0	0	18.5	18.5
NOL12	16117791	RPL35A	18|19	18.5	0	0	0	0	0	18.5	18.5
NOL12	70980549	PDCD11	15|23	19	0	0	0	0	0	19	19
NOL12	4503483	EEF2	20|22	21	0	2	0	0	2	19	19
NOL12	221316723	NAT10	17|21	19	0	0	0	0	0	19	19
NOL12	239787829	GLTSCR2	18|20	19	0	0	0	0	0	19	19
NOL12	157694492	MYBBP1A	18|20	19	0	0	0	0	0	19	19
NOL12	18104948	RPL21	19|19	19	0	0	0	0	0	19	19
NOL12	14141152	HNRNPM	25|19	22	0	2	0	2	2	20	20
NOL12	21626466	MATR3	18|27	22.5	0	2	0	0	2	20.5	20.5
NOL12	15431306	RPL8	18|24	21	0	0	0	0	0	21	21
NOL12	20336290	DHX30	20|23	21.5	0	0	0	0	0	21.5	21.5
NOL12	13904866	RPL28	20|24	22	0	0	0	0	0	22	22
NOL12	145275210	RPF1	22|22	22	0	0	0	0	0	22	22
NOL12	390608657	RPS3A	24|25	24.5	2	2	0	0	2	22.5	22.5
NOL12	9966805	DDX24	29|17	23	0	0	0	0	0	23	23
NOL12	57013276	TUBA1B	0|47	23.5	0	0	0	0	0	23.5	23.5
NOL12	4506661	RPL7A	26|27	26.5	0	2	0	3	3	23.5	23.5
NOL12	14141193	RPS9	26|27	26.5	3	3	2	3	3	23.5	23.5
NOL12	50053872	RPL7L1	21|26	23.5	0	0	0	0	0	23.5	23.5
NOL12	16933546	RPLP0	25|22	23.5	0	0	0	0	0	23.5	23.5
NOL12	4506635	RPL32	23|24	23.5	0	0	0	0	0	23.5	23.5
NOL12	222352111	NIFK	26|22	24	0	0	0	0	0	24	24
NOL12	310923196	PPAN-P2RY11	26|24	25	0	0	0	0	0	25	25
NOL12	7019419	GNL2	27|25	26	0	0	0	0	0	26	26
NOL12	126032350	PRKDC	26|26	26	0	0	0	0	0	26	26
NOL12	217330644	WDR12	28|26	27	0	0	0	0	0	27	27
NOL12	157694511	NOC2L	28|28	28	0	0	0	0	0	28	28
NOL12	4506685	RPS13	32|36	34	4	4	0	4	4	30	30
NOL12	41872631	FASN	37|40	38.5	0	8	0	4	8	30.5	30.5
NOL12	237649012	EBNA1BP2	30|31	30.5	0	0	0	0	0	30.5	30.5
NOL12	55770900	BRIX1	32|30	31	0	0	0	0	0	31	31
NOL12	15431301	RPL7	33|38	35.5	0	2	0	4	4	31.5	31.5
NOL12	73695475	HEATR1	31|32	31.5	0	0	0	0	0	31.5	31.5
NOL12	21327667	BOP1	35|37	36	3	0	0	0	3	33	33
NOL12	379317177	DDX21	32|39	35.5	0	2	0	0	2	33.5	33.5
NOL12	45643123	NVL	35|34	34.5	0	0	0	0	0	34.5	34.5
NOL12	38327634	DDX18	38|32	35	0	0	0	0	0	35	35
NOL12	4506649	RPL3	39|40	39.5	2	4	0	0	4	35.5	35.5
NOL12	15431295	RPL13	33|46	39.5	2	3	0	0	3	36.5	36.5
NOL12	385198059	NOP2	36|38	37	0	0	0	0	0	37	37
NOL12	45593130	GNL3	38|37	37.5	0	0	0	0	0	37.5	37.5
NOL12	4503247	RRP1	36|40	38	0	0	0	0	0	38	38
NOL12	20806097	NOC3L	38|38	38	0	0	0	0	0	38	38
NOL12	313569768	RPL17	33|47	40	0	0	0	0	0	40	40
NOL12	16579885	RPL4	47|41	44	0	3	0	4	4	40	40
NOL12	14719402	RRS1	36|44	40	0	0	0	0	0	40	40
NOL12	395132450	RPL13A	36|47	41.5	0	0	0	0	0	41.5	41.5
NOL12	342672053	PES1	45|38	41.5	0	0	0	0	0	41.5	41.5
NOL12	16753227	RPL6	40|54	47	2	2	0	3	3	44	44
NOL12	51094101	DDX54	45|43	44	0	0	0	0	0	44	44
NOL12	224593278	DDX27	47|47	47	0	0	0	0	0	47	47
NOL12	42542392	CEBPZ	44|51	47.5	0	0	0	0	0	47.5	47.5
NOL12	118498359	RSL1D1	44|57	50.5	0	0	0	0	0	50.5	50.5
NOL12	194097365	FTSJ3	59|60	59.5	0	0	0	0	0	59.5	59.5
NOL12	55953087	GTPBP4	60|63	61.5	0	0	0	0	0	61.5	61.5
NOL12	100913206	DHX9	66|67	66.5	0	2	0	3	3	63.5	63.5

## Sheet: Table S2
UniprotKB	Gene Name	100 mM NaCl without Rnase A				100 mM NaCl with Rnase A				300 mM NaCl with Rnase A
		avg TSC	in silico pept/prot	avg TSC/in silico pept	(prey avg TSC/in silico pept) / (Nol12 avg TSC/in silico pept)	avg TSC	in silico pept/prot	avg TSC/in silico pept	(prey avg TSC/in silico pept) / (Nol12 avg TSC/in silico pept)	avg TSC	in silico pept/prot	avg TSC/in silico pept	(prey avg TSC/in silico pept) / (Nol12 avg TSC/in silico pept)
Q9NY61	AATF	12	23	0.521739	0.127253	8.5	23	0.369565	0.119215	9.5	23	0.413043	0.129076
P28288	ABCD3	2.5	37	0.0675676	0.0164799	2.5	37	0.0675676	0.021796	0		0	0
Q8NE71	ABCF1	3.5	44	0.0795455	0.0194013	5	44	0.113636	0.0366569	0		0	0
Q9UG63	ABCF2	2	35	0.0571429	0.0139373	10	35	0.285714	0.0921659	0		0	0
Q9ULW3	ABT1	2.5	13	0.192308	0.0469043	2.5	13	0.192308	0.0620347	0		0	0
Q9UKV3	ACIN1	2	63	0.031746	0.00774293	0		0	0	0		0	0
P53396	ACLY	9.5	64	0.148438	0.0362043	10	64	0.15625	0.0504032	4.5	64	0.0703125	0.0219727
P60709	ACTB	12	20	0.6	0.146341	3	20	0.15	0.0483871	0		0	0
O43707	ACTN4	7.5	56	0.133929	0.0326655	9.5	56	0.169643	0.0547235	10.5	56	0.1875	0.0585938
P61160	ACTR2	0		0	0	2	18	0.111111	0.0358423	0		0	0
P55265	ADAR	11.5	70	0.164286	0.0400697	13.5	70	0.192857	0.062212	5.5	70	0.0785714	0.0245536
Q53H12	AGK	0		0	0	2.5	24	0.104167	0.0336022	0		0	0
P23526	AHCY	5.5	25	0.22	0.0536585	9	25	0.36	0.116129	6	25	0.24	0.075
O95831	AIFM1	4.5	32	0.140625	0.0342988	4	32	0.125	0.0403226	0		0	0
Q12904	AIMP1	4.5	18	0.25	0.0609756	2.5	18	0.138889	0.0448029	0		0	0
Q13155	AIMP2	2	18	0.111111	0.0271003	0		0	0	0		0	0
P15121	AKR1B1	0		0	0	2	18	0.111111	0.0358423	0		0	0
P54886	ALDH18A1	0		0	0	3	43	0.0697674	0.0225056	0		0	0
P51648	ALDH3A2	2	25	0.08	0.0195122	0		0	0	0		0	0
P04075	ALDOA	5.5	20	0.275	0.0670732	12	20	0.6	0.193548	7	20	0.35	0.109375
Q86V81	ALYREF	2.5	12	0.208333	0.050813	0		0	0	0		0	0
O75179	ANKRD17		0	0	0	2.5	100	0.025	0.00806452	0		0	0
P07355	ANXA2	2.5	21	0.119048	0.029036	4.5	21	0.214286	0.0691244	0		0	0
P84077	ARF1	4	11	0.363636	0.0886918	4	11	0.363636	0.117302	5	11	0.454545	0.142045
Q92974	ARHGEF2	3	57	0.0526316	0.012837	2.5	57	0.0438596	0.0141483	0		0	0
Q8N3C0	ASCC3	11	128	0.0859375	0.0209604	8.5	128	0.0664062	0.0214214	0		0	0
P08243	ASNS	2	34	0.0588235	0.0143472	3	34	0.0882353	0.028463	2.5	34	0.0735294	0.0229779
Q9NVI7	ATAD3A	4	39	0.102564	0.0250156	3	39	0.0769231	0.0248139	5.5	39	0.141026	0.0440705
Q5T9A4	ATAD3B	3	39	0.0769231	0.0187617	0		0	0	0		0	0
P31939	ATIC	2.5	35	0.0714286	0.0174216	7	35	0.2	0.0645161	5	35	0.142857	0.0446429
P05023	ATP1A1	11.5	50	0.23	0.0560976	8.5	50	0.17	0.0548387	6	50	0.12	0.0375
P16615	ATP2A2	4.5	53	0.0849057	0.0207087	5.5	53	0.103774	0.0334753	0		0	0
P20020	ATP2B1	0		0	0	2.5	57	0.0438596	0.0141483	0		0	0
P25705	ATP5A1	6	30	0.2	0.0487805	7	30	0.233333	0.0752688	5	30	0.166667	0.0520833
P06576	ATP5B	8	30	0.266667	0.0650407	11	30	0.366667	0.11828	5	30	0.166667	0.0520833
P36542	ATP5C1	3.5	14	0.25	0.0609756	4	14	0.285714	0.0921659	3	14	0.214286	0.0669643
P48047	ATP5O	2	12	0.166667	0.0406504	4.5	12	0.375	0.120968	0		0	0
Q99700	ATXN2	0		0	0	2.5	46	0.0543478	0.0175316	0		0	0
Q8WWM7	ATXN2L	0		0	0	12	41	0.292683	0.0944138	0		0	0
Q96GD4	AURKB	2.5	21	0.119048	0.029036	0		0	0	0		0	0
O95816	BAG2	0		0	0	2	14	0.142857	0.0460829	0		0	0
Q9UIG0	BAZ1B	0		0	0	0		0	0	2.5	82	0.0304878	0.00952744
O14874	BCKDK	0		0	0	2.5	21	0.119048	0.0384025	0		0	0
Q9NYF8	BCLAF1	4.5	42	0.107143	0.0261324	2.5	42	0.0595238	0.0192012	0		0	0
Q14692	BMS1	32	54	0.592593	0.144535	14.5	54	0.268519	0.0866189	18	54	0.333333	0.104167
Q14137	BOP1	30	38	0.789474	0.192555	7.5	38	0.197368	0.0636672	33	38	0.868421	0.271382
Q8TDN6	BRIX1	26.5	18	1.47222	0.359079	14	18	0.777778	0.250896	31	18	1.72222	0.538194
P20290	BTF3	0		0	0	4	8	0.5	0.16129	0		0	0
Q13895	BYSL	6.5	27	0.240741	0.0587173	8.5	27	0.314815	0.101553	2	27	0.0740741	0.0231481
Q9Y224	C14orf166	7.5	17	0.441176	0.107604	22.5	17	1.32353	0.426945	8	17	0.470588	0.147059
Q9H6W3	C14orf169	3	28	0.107143	0.0261324	7.5	28	0.267857	0.0864055	14.5	28	0.517857	0.16183
Q68DL7	C18orf63	2	43	0.0465116	0.0113443	0		0	0	0		0	0
Q07021	C1QBP	8.5	14	0.607143	0.148084	3.5	14	0.25	0.0806452	8	14	0.571429	0.178571
Q9BRJ6	C7orf50	2.5	9	0.277778	0.0677507	0		0	0	0		0	0
Q5T280	C9orf114	2.5	20	0.125	0.0304878	0		0	0	0		0	0
A6NK06	CAD		24	0	0	0		0	0	6.5	24	0.270833	0.0846354
Q86VP6	CAND1	7.5	66	0.113636	0.0277162	8.5	66	0.128788	0.0415445	3	66	0.0454545	0.0142045
P27824	CANX	4	31	0.129032	0.0314713	4	31	0.129032	0.0416233	0		0	0
Q14444	CAPRIN1	9.5	26	0.365385	0.0891182	0		0	0	0		0	0
P16152	CBR1	0		0	0	2	16	0.125	0.0403226	0		0	0
Q8N163	CCAR2	0		0	0	0		0	0	2	52	0.0384615	0.0120192
Q96CT7	CCDC124	0		0	0	2	13	0.153846	0.0496278	0		0	0
Q6PK04	CCDC137	12.5	14	0.892857	0.21777	0		0	0	7	14	0.5	0.15625
Q9H6F5	CCDC86	9.5	18	0.527778	0.128726	3	18	0.166667	0.0537634	8	18	0.444444	0.138889
P78371	CCT2	9.5	30	0.316667	0.0772358	9.5	30	0.316667	0.102151	9.5	30	0.316667	0.0989583
P49368	CCT3	5	33	0.151515	0.0369549	0		0	0	0		0	0
P50991	CCT4	4.5	32	0.140625	0.0342988	6	32	0.1875	0.0604839	8	32	0.25	0.078125
P48643	CCT5	7.5	34	0.220588	0.053802	9.5	34	0.279412	0.0901328	6.5	34	0.191176	0.0597426
P40227	CCT6A	10	27	0.37037	0.0903342	6	27	0.222222	0.0716846	3	27	0.111111	0.0347222
Q99832	CCT7	2	31	0.0645161	0.0157356	6	31	0.193548	0.062435	6	31	0.193548	0.0604839
P50990	CCT8	7	38	0.184211	0.0449294	6.5	38	0.171053	0.0551783	5.5	38	0.144737	0.0452303
Q99459	CDC5L	7.5	37	0.202703	0.0494397	0		0	0	6	37	0.162162	0.0506757
Q6P1J9	CDC73	3	35	0.0857143	0.0209059	2	35	0.0571429	0.0184332	0		0	0
Q03701	CEBPZ	31	52	0.596154	0.145403	4.5	52	0.0865385	0.0279156	47.5	52	0.913462	0.285457
P07199	CENPB	0		0	0	0		0	0	2	20	0.1	0.03125
P23528	CFL1	2	11	0.181818	0.0443459	4.5	11	0.409091	0.131965	0		0	0
O14646	CHD1	0		0	0	0		0	0	2	95	0.0210526	0.00657895
Q14839	CHD4	6	93	0.0645161	0.0157356	0		0	0	4	93	0.0430108	0.0134409
Q969X6	CIRH1A	15.5	36	0.430556	0.105014	3	36	0.0833333	0.0268817	7.5	36	0.208333	0.0651042
Q07065	CKAP4	6	39	0.153846	0.0375235	5.5	39	0.141026	0.0454921	0		0	0
Q14008	CKAP5	9.5	114	0.0833333	0.0203252	0		0	0	0		0	0
Q9Y259	CKB	9.5	25	0.38	0.0926829	2.5	25	0.1	0.0322581	0		0	0
P12532	CKMT1B	0		0	0	3.5	22	0.159091	0.0513196	0		0	0
Q00610	CLTC	15	90	0.166667	0.0406504	19.5	90	0.216667	0.0698925	11	90	0.122222	0.0381944
P38432	COIL	3.5	29	0.12069	0.0294365	0		0	0	3	29	0.103448	0.0323276
P53621	COPA	9	72	0.125	0.0304878	9.5	72	0.131944	0.0425627	5.5	72	0.0763889	0.0238715
P00403	COX2	0		0	0	3	9	0.333333	0.107527	0		0	0
P13073	COX4I1	0		0	0	2.5	10	0.25	0.0806452	0		0	0
O75390	CS	3.5	22	0.159091	0.0388027	4	22	0.181818	0.058651	0		0	0
P48730	CSNK1D	0		0	0	2	20	0.1	0.0322581	0		0	0
P68400	CSNK2A1	0		0	0	3	21	0.142857	0.0460829	9	21	0.428571	0.133929
P19784	CSNK2A2	0		0	0	2	20	0.1	0.0322581	0		0	0
Q8WYA6	CTNNBL1	0		0	0	3	25	0.12	0.0387097	0		0	0
P17812	CTPS1	0		0	0	2.5	33	0.0757576	0.0244379	0		0	0
P00387	CYB5R3	2.5	15	0.166667	0.0406504	2.5	15	0.166667	0.0537634	2.5	15	0.166667	0.0520833
P08574	CYC1	2	16	0.125	0.0304878	0		0	0	0		0	0
Q96F07	CYFIP2	2.5	75	0.0333333	0.00813008	3	75	0.04	0.0129032	0		0	0
P51398	DAP3	10.5	23	0.456522	0.111347	6.5	23	0.282609	0.0911641	7	23	0.304348	0.0951087
P14868	DARS	11.5	37	0.310811	0.0758075	7	37	0.189189	0.0610288	0		0	0
Q6PI48	DARS2	3	38	0.0789474	0.0192555	0		0	0	0		0	0
Q9NV06	DCAF13	7.5	24	0.3125	0.0762195	0		0	0	5	24	0.208333	0.0651042
Q16531	DDB1	0		0	0	0		0	0	6	60	0.1	0.03125
P39656	DDOST	0		0	0	5	21	0.238095	0.0768049	3	21	0.142857	0.0446429
Q92499	DDX1	14.5	42	0.345238	0.0842044	42.5	42	1.0119	0.326421	11.5	42	0.27381	0.0855655
Q13206	DDX10	11.5	46	0.25	0.0609756	8.5	46	0.184783	0.0596073	9.5	46	0.206522	0.064538
Q92841	DDX17	16	36	0.444444	0.108401	17.5	36	0.486111	0.15681	11	36	0.305556	0.0954861
Q9NVP1	DDX18	32	34	0.941176	0.229555	15.5	34	0.455882	0.147059	35	34	1.02941	0.321691
Q9NR30	DDX21	50.5	42	1.20238	0.293264	42	42	1	0.322581	33.5	42	0.797619	0.249256
Q9BUQ8	DDX23	10.5	45	0.233333	0.0569106	4.5	45	0.1	0.0322581	0		0	0
Q9GZR7	DDX24	12	46	0.26087	0.0636267	6	46	0.130435	0.0420757	23	46	0.5	0.15625
Q96GQ7	DDX27	31	43	0.72093	0.175837	11.5	43	0.267442	0.0862716	47	43	1.09302	0.34157
Q9NUL7	DDX28	0		0	0	2	34	0.0588235	0.0189753	0		0	0
Q9H8H2	DDX31	0		0	0	2	48	0.0416667	0.0134409	2	48	0.0416667	0.0130208
Q13838	DDX39B	3	24	0.125	0.0304878	3	24	0.125	0.0403226	3	24	0.125	0.0390625
O00571	DDX3X	11	41	0.268293	0.0654372	8	41	0.195122	0.0629426	7.5	41	0.182927	0.0571646
Q9H0S4	DDX47	13	22	0.590909	0.144124	5	22	0.227273	0.0733138	2.5	22	0.113636	0.0355114
Q9Y6V7	DDX49	5	26	0.192308	0.0469043	0		0	0	0		0	0
P17844	DDX5	16	33	0.484848	0.118256	26	33	0.787879	0.254154	5	33	0.151515	0.0473485
Q9BQ39	DDX50	13	37	0.351351	0.0856955	18.5	37	0.5	0.16129	12.5	37	0.337838	0.105574
Q8N8A6	DDX51	6.5	36	0.180556	0.0440379	0		0	0	0		0	0
Q9Y2R4	DDX52	15.5	28	0.553571	0.135017	5	28	0.178571	0.0576037	0		0	0
Q8TDD1	DDX54	32.5	47	0.691489	0.168656	16	47	0.340426	0.109815	44	47	0.93617	0.292553
Q8NHQ9	DDX55	7.5	35	0.214286	0.0522648	7.5	35	0.214286	0.0691244	0		0	0
Q9NY93	DDX56	18.5	31	0.596774	0.145555	9.5	31	0.306452	0.0988554	14.5	31	0.467742	0.146169
O43143	DHX15	10.5	41	0.256098	0.0624628	0		0	0	10.5	41	0.256098	0.0800305
Q7Z478	DHX29	0		0	0	12	76	0.157895	0.0509338	0		0	0
Q7L2E3	DHX30	19	74	0.256757	0.0626236	31.5	74	0.425676	0.137315	21.5	74	0.290541	0.0907939
Q9H6R0	DHX33	5	42	0.119048	0.029036	0		0	0	0		0	0
Q8IY37	DHX37	5	59	0.0847458	0.0206697	3.5	59	0.059322	0.0191361	0		0	0
Q6P158	DHX57	0		0	0	6.5	75	0.0866667	0.027957	2	75	0.0266667	0.00833333
Q08211	DHX9	46	68	0.676471	0.164993	40	68	0.588235	0.189753	63.5	68	0.933824	0.29182
Q9UNQ2	DIMT1	0		0	0	3.5	20	0.175	0.0564516	0		0	0
Q9Y2L1	DIS3	2	51	0.0392157	0.0095648	0		0	0	0		0	0
O60832	DKC1	8.5	28	0.303571	0.0740418	0		0	0	5	28	0.178571	0.0558036
P09622	DLD	0		0	0	3	25	0.12	0.0387097	0		0	0
P31689	DNAJA1	2.5	19	0.131579	0.0320924	4	19	0.210526	0.0679117	2	19	0.105263	0.0328947
Q96EY1	DNAJA3	4.5	22	0.204545	0.0498891	4	22	0.181818	0.058651	2	22	0.0909091	0.0284091
O75165	DNAJC13	0		0	0	25.5	120	0.2125	0.0685484	0		0	0
P26358	DNMT1	3	78	0.0384615	0.00938086	0		0	0	0		0	0
Q5QJE6	DNTTIP2	9	35	0.257143	0.0627178	0		0	0	7	35	0.2	0.0625
Q96N67	DOCK7	2	119	0.0168067	0.0040992	0		0	0	0		0	0
O60762	DPM1	0		0	0	2.5	16	0.15625	0.0504032	0		0	0
Q92597	DRG1	0		0	0	2.5	16	0.15625	0.0504032	0		0	0
Q14204	DYNC1H1	15	265	0.0566038	0.0138058	25	265	0.0943396	0.0304321	10	265	0.0377358	0.0117925
Q99848	EBNA1BP2	19	16	1.1875	0.289634	12	16	0.75	0.241935	30.5	16	1.90625	0.595703
Q13011	ECH1	6.5	19	0.342105	0.0834403	4.5	19	0.236842	0.0764007	0		0	0
O75521	ECI2	2	20	0.1	0.0243902	0		0	0	0		0	0
P24534	EEF1B2	2.5	12	0.208333	0.050813	0		0	0	0		0	0
O43324	EEF1E1	2	13	0.153846	0.0375235	2.5	13	0.192308	0.0620347	0		0	0
P26641	EEF1G	3.5	26	0.134615	0.032833	4	26	0.153846	0.0496278	3	26	0.115385	0.0360577
P13639	EEF2	19	49	0.387755	0.0945744	31	49	0.632653	0.204082	19	49	0.387755	0.121173
Q15029	EFTUD2	25.5	55	0.463636	0.113082	16	55	0.290909	0.0938416	4.5	55	0.0818182	0.0255682
P19525	EIF2AK2	7.5	24	0.3125	0.0762195	2	24	0.0833333	0.0268817	0		0	0
P05198	EIF2S1	3.5	22	0.159091	0.0388027	0		0	0	0		0	0
P20042	EIF2S2	2	21	0.0952381	0.0232288	0		0	0	0		0	0
P41091	EIF2S3	4.5	23	0.195652	0.04772	5	23	0.217391	0.0701262	0		0	0
Q14152	EIF3A	15	73	0.205479	0.0501169	25	73	0.342466	0.110473	3	73	0.0410959	0.0128425
P55884	EIF3B	8	38	0.210526	0.0513479	9.5	38	0.25	0.0806452	4	38	0.105263	0.0328947
B5ME19	EIF3CL	6	45	0.133333	0.0325203	5	45	0.111111	0.0358423	4.5	45	0.1	0.03125
O15371	EIF3D	3	25	0.12	0.0292683	4.5	25	0.18	0.0580645	0		0	0
P60228	EIF3E	2	30	0.0666667	0.0162602	6	30	0.2	0.0645161	0		0	0
O00303	EIF3F	4	17	0.235294	0.0573888	5	17	0.294118	0.0948767	0		0	0
O15372	EIF3H	0		0	0	5.5	22	0.25	0.0806452	0		0	0
Q13347	EIF3I	2	20	0.1	0.0243902	4.5	20	0.225	0.0725806	0		0	0
Q9UBQ5	EIF3K	0		0	0	2	12	0.166667	0.0537634	0		0	0
Q9Y262	EIF3L	4.5	34	0.132353	0.0322812	7.5	34	0.220588	0.0711575	0		0	0
Q7L2H7	EIF3M	2	21	0.0952381	0.0232288	3	21	0.142857	0.0460829	0		0	0
P60842	EIF4A1	7	24	0.291667	0.0711382	10	24	0.416667	0.134409	7.5	24	0.3125	0.0976562
P38919	EIF4A3	3.5	25	0.14	0.0341463	5.5	25	0.22	0.0709677	2.5	25	0.1	0.03125
Q04637	EIF4G1	8.5	71	0.119718	0.0291996	8.5	71	0.119718	0.0386188	0		0	0
O60841	EIF5B	3	57	0.0526316	0.012837	2	57	0.0350877	0.0113186	0		0	0
P56537	EIF6	7.5	11	0.681818	0.166297	6.5	11	0.590909	0.190616	12	11	1.09091	0.340909
Q15717	ELAVL1	3.5	16	0.21875	0.0533537	0		0	0	2	16	0.125	0.0390625
Q8N766	EMC1	3	54	0.0555556	0.0135501	0		0	0	0		0	0
P50402	EMD	2.5	15	0.166667	0.0406504	0		0	0	3	15	0.2	0.0625
Q92979	EMG1	6.5	14	0.464286	0.11324	0		0	0	2	14	0.142857	0.0446429
P06733	ENO1	19.5	25	0.78	0.190244	19.5	25	0.78	0.251613	13	25	0.52	0.1625
P58107	EPPK1	0		0	0	0		0	0	2	262	0.00763359	0.0023855
P07814	EPRS	29.5	80	0.36875	0.089939	13	80	0.1625	0.0524194	0		0	0
Q9H501	ESF1	4.5	41	0.109756	0.0267698	0		0	0	0		0	0
Q01844	EWSR1	2	16	0.125	0.0304878	0		0	0	0		0	0
Q01780	EXOSC10	15.5	56	0.276786	0.0675087	12.5	56	0.223214	0.0720046	3.5	56	0.0625	0.0195312
Q13868	EXOSC2	9	15	0.6	0.146341	10.5	15	0.7	0.225806	0		0	0
Q9NPD3	EXOSC4	0		0	0	4	12	0.333333	0.107527	0		0	0
Q9NQT4	EXOSC5	2	11	0.181818	0.0443459	0		0	0	0		0	0
Q5RKV6	EXOSC6	4.5	13	0.346154	0.0844278	3	13	0.230769	0.0744417	0		0	0
Q15024	EXOSC7	4	17	0.235294	0.0573888	5.5	17	0.323529	0.104364	0		0	0
Q96B26	EXOSC8	0		0	0	3	16	0.1875	0.0604839	0		0	0
Q06265	EXOSC9	2.5	19	0.131579	0.0320924	0		0	0	0		0	0
P15311	EZR	3.5	38	0.0921053	0.0224647	0		0	0	0		0	0
Q9NSI2	FAM207A	3.5	12	0.291667	0.0711382	0		0	0	0		0	0
Q8NCA5	FAM98A	2.5	23	0.108696	0.0265111	10.5	23	0.456522	0.147265	0		0	0
Q52LJ0	FAM98B	0		0	0	7	15	0.466667	0.150538	0		0	0
Q9Y285	FARSA	11	26	0.423077	0.103189	0		0	0	0		0	0
Q9NSD9	FARSB	13	34	0.382353	0.0932568	3	34	0.0882353	0.028463	2	34	0.0588235	0.0183824
P49327	FASN	29	129	0.224806	0.0548308	41.5	129	0.321705	0.103776	30.5	129	0.236434	0.0738857
P35544	FAU	3	3	1	0.243902	3	3	1	0.322581	0		0	0
P22087	FBL	22	19	1.15789	0.282413	9	19	0.473684	0.152801	9	19	0.473684	0.148026
Q14318	FKBP8	0		0	0	2	19	0.105263	0.0339559	0		0	0
Q13045	FLII	3	68	0.0441176	0.0107604	2.5	68	0.0367647	0.0118596	0		0	0
P21333	FLNA	10.5	139	0.0755396	0.0184243	13.5	139	0.0971223	0.0313298	4	139	0.028777	0.00899281
Q06787	FMR1	8	36	0.222222	0.0542005	9	36	0.25	0.0806452	0		0	0
Q8IY81	FTSJ3	47.5	40	1.1875	0.289634	28.5	40	0.7125	0.229839	59.5	40	1.4875	0.464844
P35637	FUS	2.5	12	0.208333	0.050813	0		0	0	0		0	0
P51114	FXR1	4	33	0.121212	0.0295639	7.5	33	0.227273	0.0733138	0		0	0
P51116	FXR2	3	36	0.0833333	0.0203252	5	36	0.138889	0.0448029	0		0	0
Q13283	G3BP1	12	20	0.6	0.146341	5.5	20	0.275	0.0887097	0		0	0
Q14697	GANAB	0		0	0	4.5	49	0.0918367	0.0296248	4	49	0.0816327	0.0255102
P04406	GAPDH	14.5	17	0.852941	0.208034	12.5	17	0.735294	0.237192	13	17	0.764706	0.238971
P22102	GART	6	51	0.117647	0.0286944	8	51	0.156863	0.0506009	4.5	51	0.0882353	0.0275735
Q92616	GCN1L1	15.5	164	0.0945122	0.0230518	14.5	164	0.0884146	0.0285208	3	164	0.0182927	0.00571646
P50395	GDI2	4.5	28	0.160714	0.0391986	3.5	28	0.125	0.0403226	2	28	0.0714286	0.0223214
Q04760	GLO1	0		0	0	0		0	0	2	11	0.181818	0.0568182
Q9NZM5	GLTSCR2	13.5	18	0.75	0.182927	12	18	0.666667	0.215054	19	18	1.05556	0.329861
P00367	GLUD1	8	32	0.25	0.0609756	2	32	0.0625	0.0201613	0		0	0
Q49A26	GLYR1	2	27	0.0740741	0.0180668	0		0	0	2.5	27	0.0925926	0.0289352
P63244	GNB2L1	0		0	0	6.5	20	0.325	0.104839	4	20	0.2	0.0625
Q9HAV0	GNB4	0		0	0	2	17	0.117647	0.0379507	0		0	0
Q13823	GNL2	17	38	0.447368	0.109114	13	38	0.342105	0.110357	26	38	0.684211	0.213816
Q9BVP2	GNL3	32	26	1.23077	0.300188	24	26	0.923077	0.297767	37.5	26	1.44231	0.450721
Q9NVN8	GNL3L	2.5	35	0.0714286	0.0174216	10	35	0.285714	0.0921659	0		0	0
P00505	GOT2	2.5	26	0.0961538	0.0234522	3	26	0.115385	0.0372208	2	26	0.0769231	0.0240385
P06744	GPI	9.5	27	0.351852	0.0858175	14	27	0.518519	0.167264	8.5	27	0.314815	0.0983796
Q9BQ67	GRWD1	3	20	0.15	0.0365854	2	20	0.1	0.0322581	2	20	0.1	0.03125
P78347	GTF2I	2	55	0.0363636	0.00886918	0		0	0	0		0	0
Q9BZE4	GTPBP4	60.5	36	1.68056	0.409892	37.5	36	1.04167	0.336022	61.5	36	1.70833	0.533854
Q92522	H1FX	4	10	0.4	0.097561	0		0	0	0		0	0
O75367	H2AFY	6.5	18	0.361111	0.0880759	4.5	18	0.25	0.0806452	3.5	18	0.194444	0.0607639
P40939	HADHA	14.5	39	0.371795	0.0906817	15	39	0.384615	0.124069	6	39	0.153846	0.0480769
P55084	HADHB	3	27	0.111111	0.0271003	5.5	27	0.203704	0.0657109	2	27	0.0740741	0.0231481
Q00341	HDLBP	4	66	0.0606061	0.014782	0		0	0	0		0	0
Q9H583	HEATR1	59.5	120	0.495833	0.120935	6.5	120	0.0541667	0.0174731	31.5	120	0.2625	0.0820312
Q9UII4	HERC5	0		0	0	6.5	55	0.118182	0.0381232	2	55	0.0363636	0.0113636
P16403	HIST1H1C	0		0	0	2	7	0.285714	0.0921659	2.5	7	0.357143	0.111607
Q96QV6	HIST1H2AA	0		0	0	2	6	0.333333	0.107527	0		0	0
P58876	HIST1H2BD	0		0	0	10.5	6	1.75	0.564516	5	6	0.833333	0.260417
P68431	HIST1H3F	0		0	0	2	5	0.4	0.129032	2.5	5	0.5	0.15625
P62805	HIST1H4J	7.5	5	1.5	0.365854	7	5	1.4	0.451613	4.5	5	0.9	0.28125
Q6FI13	HIST2H2AA4	0		0	0	0		0	0	8	5	1.6	0.5
Q8IUE6	HIST2H2AB	4.5	6	0.75	0.182927	0		0	0	0		0	0
P19367	HK1	0		0	0	3	54	0.0555556	0.0179211	2	54	0.037037	0.0115741
O75330	HMMR	3	48	0.0625	0.0152439	0		0	0	0		0	0
P09651	HNRNPA1	9.5	17	0.558824	0.136298	0		0	0	0		0	0
P22626	HNRNPA2B1	6	19	0.315789	0.0770218	2	19	0.105263	0.0339559	0		0	0
P51991	HNRNPA3	4	18	0.222222	0.0542005	0		0	0	0		0	0
P07910	HNRNPC	2	17	0.117647	0.0286944	12.5	17	0.735294	0.237192	11.5	17	0.676471	0.211397
Q14103	HNRNPD	2	15	0.133333	0.0325203	0		0	0	0		0	0
P52597	HNRNPF	0		0	0	0		0	0	3.5	21	0.166667	0.0520833
P31943	HNRNPH1	6	23	0.26087	0.0636267	0		0	0	3	23	0.130435	0.0407609
P55795	HNRNPH2	2.5	21	0.119048	0.029036	0		0	0	0		0	0
P61978	HNRNPK	7	25	0.28	0.0682927	3	25	0.12	0.0387097	0		0	0
P14866	HNRNPL	3.5	27	0.12963	0.031617	5	27	0.185185	0.0597372	3.5	27	0.12963	0.0405093
P52272	HNRNPM	48	45	1.06667	0.260163	14	45	0.311111	0.100358	20	45	0.444444	0.138889
O43390	HNRNPR	0		0	0	6.5	33	0.19697	0.0635386	0		0	0
Q00839	HNRNPU	10.5	31	0.33871	0.0826121	9.5	31	0.306452	0.0988554	9	31	0.290323	0.0907258
Q5SSJ5	HP1BP3	0		0	0	0		0	0	2	25	0.08	0.025
P00492	HPRT1	3.5	12	0.291667	0.0711382	4.5	12	0.375	0.120968	3.5	12	0.291667	0.0911458
Q99714	HSD17B10	3.5	14	0.25	0.0609756	0		0	0	3	14	0.214286	0.0669643
P51659	HSD17B4	17.5	37	0.472973	0.115359	14	37	0.378378	0.122058	0		0	0
P07900	HSP90AA1	16.5	37	0.445946	0.108767	13	37	0.351351	0.113339	10.5	37	0.283784	0.0886824
P08238	HSP90AB1	2	38	0.0526316	0.012837	4.5	38	0.118421	0.0382003	0		0	0
P14625	HSP90B1	4.5	44	0.102273	0.0249446	4	44	0.0909091	0.0293255	5.5	44	0.125	0.0390625
P0DMV9	HSPA1B	16	34	0.470588	0.114778	14	34	0.411765	0.132827	7	34	0.205882	0.0643382
P34931	HSPA1L	6	34	0.176471	0.0430416	4.5	34	0.132353	0.0426945	0		0	0
P34932	HSPA4	4	53	0.0754717	0.0184077	2.5	53	0.0471698	0.0152161	3	53	0.0566038	0.0176887
P11021	HSPA5	2.5	33	0.0757576	0.0184775	5	33	0.151515	0.0488759	4.5	33	0.136364	0.0426136
P11142	HSPA8	9	35	0.257143	0.0627178	7	35	0.2	0.0645161	10	35	0.285714	0.0892857
P38646	HSPA9	6.5	38	0.171053	0.0417202	6.5	38	0.171053	0.0551783	0		0	0
P10809	HSPD1	8.5	31	0.274194	0.0668765	16	31	0.516129	0.166493	11.5	31	0.370968	0.115927
P41252	IARS	12	64	0.1875	0.0457317	9	64	0.140625	0.0453629	3.5	64	0.0546875	0.0170898
Q9NZI8	IGF2BP1	8.5	31	0.274194	0.0668765	7	31	0.225806	0.0728408	3	31	0.0967742	0.0302419
O00425	IGF2BP3	3	31	0.0967742	0.0236035	2.5	31	0.0806452	0.0260146	0		0	0
Q12905	ILF2	13.5	19	0.710526	0.173299	7.5	19	0.394737	0.127334	3.5	19	0.184211	0.0575658
Q12906	ILF3	11.5	42	0.27381	0.0667828	9.5	42	0.22619	0.0729647	11.5	42	0.27381	0.0855655
Q9NV31	IMP3	4.5	11	0.409091	0.0997783	2	11	0.181818	0.058651	4	11	0.363636	0.113636
Q96G21	IMP4	7.5	14	0.535714	0.130662	0		0	0	4.5	14	0.321429	0.100446
P12268	IMPDH2	0		0	0	0		0	0	2.5	25	0.1	0.03125
Q8TEX9	IPO4	3	56	0.0535714	0.0130662	2.5	56	0.0446429	0.0144009	0		0	0
O00410	IPO5	0		0	0	4.5	58	0.0775862	0.0250278	2	58	0.0344828	0.0107759
P46940	IQGAP1	12.5	83	0.150602	0.0367323	5.5	83	0.0662651	0.0213758	0		0	0
O14654	IRS4	8.5	62	0.137097	0.0334382	10.5	62	0.169355	0.0546306	5	62	0.0806452	0.0252016
Q9H9L3	ISG20L2	3	18	0.166667	0.0406504	0		0	0	0		0	0
Q15046	KARS	8.5	32	0.265625	0.0647866	5	32	0.15625	0.0504032	0		0	0
Q07666	KHDRBS1	0		0	0	3	14	0.214286	0.0691244	0		0	0
Q92945	KHSRP	7	36	0.194444	0.0474255	0		0	0	0		0	0
Q15397	KIAA0020	18	33	0.545455	0.133038	3.5	33	0.106061	0.0342131	13	33	0.393939	0.123106
Q15058	KIF14	2.5	102	0.0245098	0.005978	0		0	0	0		0	0
Q02241	KIF23	3.5	54	0.0648148	0.0158085	0		0	0	0		0	0
O00139	KIF2A	3.5	38	0.0921053	0.0224647	0		0	0	0		0	0
P52292	KPNA2	4	24	0.166667	0.0406504	3	24	0.125	0.0403226	2	24	0.0833333	0.0260417
Q14974	KPNB1	7.5	43	0.174419	0.0425411	11.5	43	0.267442	0.0862716	7	43	0.162791	0.0508721
Q8N9T8	KRI1	2.5	27	0.0925926	0.0225836	6	27	0.222222	0.0716846	0		0	0
Q13601	KRR1	6.5	18	0.361111	0.0880759	6	18	0.333333	0.107527	0		0	0
P04264	KRT1	9	32	0.28125	0.0685976	0		0	0	0		0	0
P13645	KRT10	11	29	0.37931	0.0925147	0		0	0	0		0	0
P35908	KRT2	13.5	37	0.364865	0.0889914	6	37	0.162162	0.0523104	0		0	0
P13647	KRT5	2	33	0.0606061	0.014782	0		0	0	0		0	0
P35527	KRT9	4.5	29	0.155172	0.0378469	2	29	0.0689655	0.0222469	0		0	0
P83111	LACTB	0		0	0	0		0	0	4	28	0.142857	0.0446429
Q6PKG0	LARP1	4.5	62	0.0725806	0.0177026	17	62	0.274194	0.0884495	0		0	0
Q71RC2	LARP4	0		0	0	5	31	0.16129	0.0520291	0		0	0
Q92615	LARP4B	0		0	0	2.5	35	0.0714286	0.0230415	0		0	0
Q9P2J5	LARS	14.5	63	0.230159	0.0561363	12	63	0.190476	0.0614439	0		0	0
Q9Y4W2	LAS1L	9	40	0.225	0.054878	14	40	0.35	0.112903	12.5	40	0.3125	0.0976562
Q14739	LBR	5	25	0.2	0.0487805	2.5	25	0.1	0.0322581	0		0	0
P00338	LDHA	6.5	20	0.325	0.0792683	7.5	20	0.375	0.120968	6	20	0.3	0.09375
P07195	LDHB	5.5	19	0.289474	0.0706033	8.5	19	0.447368	0.144312	5.5	19	0.289474	0.0904605
Q9BRT6	LLPH	4	3	1.33333	0.325203	5.5	3	1.83333	0.591398	5	3	1.66667	0.520833
P20700	LMNB1	2	36	0.0555556	0.0135501	0		0	0	0		0	0
P42704	LRPPRC	3	91	0.032967	0.00804074	0		0	0	0		0	0
Q8N1G4	LRRC47	3	31	0.0967742	0.0236035	3.5	31	0.112903	0.0364204	0		0	0
Q96AG4	LRRC59	8	14	0.571429	0.139373	6	14	0.428571	0.138249	2	14	0.142857	0.0446429
Q3MHD2	LSM12	0		0	0	3	9	0.333333	0.107527	0		0	0
Q96GA3	LTV1	0		0	0	7.5	24	0.3125	0.100806	0		0	0
Q9NX58	LYAR	3.5	19	0.184211	0.0449294	5.5	19	0.289474	0.0933786	0		0	0
Q9BXY0	MAK16	10	15	0.666667	0.162602	4	15	0.266667	0.0860215	15	15	1	0.3125
P56192	MARS	9	40	0.225	0.054878	5	40	0.125	0.0403226	3.5	40	0.0875	0.0273437
P43243	MATR3	11.5	44	0.261364	0.0637472	12	44	0.272727	0.0879765	20.5	44	0.465909	0.145597
P49736	MCM2	0		0	0	0		0	0	3.5	50	0.07	0.021875
P25205	MCM3	2	51	0.0392157	0.0095648	0		0	0	2	51	0.0392157	0.0122549
P33992	MCM5	0		0	0	0		0	0	2	41	0.0487805	0.0152439
P33993	MCM7	0		0	0	0		0	0	3	40	0.075	0.0234375
P40926	MDH2	6	21	0.285714	0.0696864	5.5	21	0.261905	0.0844854	5.5	21	0.261905	0.0818452
Q9NU22	MDN1	13.5	304	0.0444079	0.0108312	19.5	304	0.0641447	0.0206919	9.5	304	0.03125	0.00976562
Q15528	MED22	2	8	0.25	0.0609756	0		0	0	0		0	0
P46013	MKI67	21.5	172	0.125	0.0304878	2.5	172	0.0145349	0.00468867	0		0	0
Q13724	MOGS	6.5	44	0.147727	0.036031	3.5	44	0.0795455	0.0256598	0		0	0
Q9HCE1	MOV10	0		0	0	2.5	55	0.0454545	0.0146628	4.5	55	0.0818182	0.0255682
O00566	MPHOSPH10	15.5	28	0.553571	0.135017	2.5	28	0.0892857	0.0288018	3.5	28	0.125	0.0390625
P52815	MRPL12	3.5	10	0.35	0.0853659	0		0	0	0		0	0
Q9P015	MRPL15	0		0	0	0		0	0	3	17	0.176471	0.0551471
Q9H0U6	MRPL18	0		0	0	0		0	0	2	10	0.2	0.0625
Q7Z2W9	MRPL21	0		0	0	0		0	0	3	13	0.230769	0.0721154
Q9NWU5	MRPL22	0		0	0	5	12	0.416667	0.134409	0		0	0
Q16540	MRPL23	0		0	0	2.5	8	0.3125	0.100806	3	8	0.375	0.117188
Q96A35	MRPL24	0		0	0	0		0	0	3	15	0.2	0.0625
Q96DV4	MRPL38	0		0	0	0		0	0	3	22	0.136364	0.0426136
Q9BYD3	MRPL4	0		0	0	0		0	0	2	17	0.117647	0.0367647
Q9H9J2	MRPL44	0		0	0	0		0	0	2.5	19	0.131579	0.0411184
P82664	MRPS10	6.5	13	0.5	0.121951	0		0	0	3.5	13	0.269231	0.0841346
P82912	MRPS11	5.5	9	0.611111	0.149051	0		0	0	0		0	0
O60783	MRPS14	3	7	0.428571	0.10453	0		0	0	0		0	0
P82914	MRPS15	6	13	0.461538	0.11257	3	13	0.230769	0.0744417	3.5	13	0.269231	0.0841346
Q9Y3D3	MRPS16	0		0	0	0		0	0	2	10	0.2	0.0625
Q9Y2R5	MRPS17	0		0	0	2	5	0.4	0.129032	0		0	0
Q9Y676	MRPS18B	4.5	14	0.321429	0.0783972	3.5	14	0.25	0.0806452	3.5	14	0.25	0.078125
Q9Y399	MRPS2	7.5	20	0.375	0.0914634	3.5	20	0.175	0.0564516	4.5	20	0.225	0.0703125
P82921	MRPS21	3	6	0.5	0.121951	0		0	0	2	6	0.333333	0.104167
P82650	MRPS22	16.5	23	0.717391	0.174973	7.5	23	0.326087	0.105189	10.5	23	0.456522	0.142663
Q9Y3D9	MRPS23	5.5	13	0.423077	0.103189	2.5	13	0.192308	0.0620347	2.5	13	0.192308	0.0600962
P82663	MRPS25	2	11	0.181818	0.0443459	2	11	0.181818	0.058651	2.5	11	0.227273	0.0710227
Q9BYN8	MRPS26	9	12	0.75	0.182927	6	12	0.5	0.16129	4	12	0.333333	0.104167
Q92552	MRPS27	10	25	0.4	0.097561	6	25	0.24	0.0774194	7	25	0.28	0.0875
Q9Y2Q9	MRPS28	9	13	0.692308	0.168856	0		0	0	0		0	0
Q92665	MRPS31	18.5	23	0.804348	0.196182	7.5	23	0.326087	0.105189	8	23	0.347826	0.108696
P82930	MRPS34	11	13	0.846154	0.206379	6.5	13	0.5	0.16129	5	13	0.384615	0.120192
P82673	MRPS35	11.5	16	0.71875	0.175305	4.5	16	0.28125	0.0907258	3.5	16	0.21875	0.0683594
P82675	MRPS5	9.5	25	0.38	0.0926829	0		0	0	2.5	25	0.1	0.03125
P82932	MRPS6	2	8	0.25	0.0609756	0		0	0	0		0	0
Q9Y2R9	MRPS7	10	13	0.769231	0.187617	3	13	0.230769	0.0744417	2.5	13	0.192308	0.0600962
P82933	MRPS9	7.5	25	0.3	0.0731707	4	25	0.16	0.0516129	4.5	25	0.18	0.05625
Q9UKD2	MRTO4	14.5	15	0.966667	0.235772	7.5	15	0.5	0.16129	16.5	15	1.1	0.34375
P52701	MSH6	2	68	0.0294118	0.0071736	0		0	0	3.5	68	0.0514706	0.0160846
Q86UE4	MTDH	0		0	0	6.5	28	0.232143	0.0748848	0		0	0
P11586	MTHFD1	5.5	53	0.103774	0.0253106	16.5	53	0.311321	0.100426	4.5	53	0.0849057	0.026533
Q6UB35	MTHFD1L	3	49	0.0612245	0.0149328	7.5	49	0.153061	0.0493746	0		0	0
Q9NVV4	MTPAP	2.5	29	0.0862069	0.0210261	2.5	29	0.0862069	0.0278087	0		0	0
Q9BQG0	MYBBP1A	72	72	1	0.243902	27.5	72	0.381944	0.123208	19	72	0.263889	0.0824653
P35580	MYH10	10	107	0.0934579	0.0227946	10.5	107	0.0981308	0.0316551	8	107	0.0747664	0.0233645
P35579	MYH9	12	109	0.110092	0.0268516	14.5	109	0.133028	0.0429121	7	109	0.0642202	0.0200688
O14950	MYL12B	3.5	9	0.388889	0.0948509	2.5	9	0.277778	0.0896057	0		0	0
P60660	MYL6	3.5	10	0.35	0.0853659	2.5	10	0.25	0.0806452	0		0	0
O43795	MYO1B	5	65	0.0769231	0.0187617	4.5	65	0.0692308	0.0223325	4.5	65	0.0692308	0.0216346
Q12965	MYO1C	7	61	0.114754	0.0279888	3.5	61	0.057377	0.0185087	3	61	0.0491803	0.0153689
O94832	MYO1D	5	64	0.078125	0.0190549	3.5	64	0.0546875	0.0176411	0		0	0
Q9Y4I1	MYO5A	6.5	110	0.0590909	0.0144124	8.5	110	0.0772727	0.0249267	0		0	0
Q9BXJ9	NAA15	0		0	0	3.5	55	0.0636364	0.0205279	0		0	0
P55209	NAP1L1	0		0	0	3	15	0.2	0.0645161	3	15	0.2	0.0625
Q9H0A0	NAT10	38	59	0.644068	0.15709	25	59	0.423729	0.136687	19	59	0.322034	0.100636
Q86XI2	NCAPG2	3	69	0.0434783	0.0106045	0		0	0	0		0	0
P19338	NCL	18	31	0.580645	0.141621	0		0	0	0		0	0
Q96MG7	NDNL2	4	21	0.190476	0.0464576	0		0	0	0		0	0
Q16795	NDUFA9	4	23	0.173913	0.0424178	2.5	23	0.108696	0.0350631	0		0	0
Q8NEJ9	NGDN	4	16	0.25	0.0609756	0		0	0	4	16	0.25	0.078125
P55769	NHP2L1	4.5	7	0.642857	0.156794	0		0	0	0		0	0
Q9BYG3	NIFK	20	15	1.33333	0.325203	7.5	15	0.5	0.16129	24	15	1.6	0.5
Q9Y221	NIP7	7.5	9	0.833333	0.203252	7	9	0.777778	0.250896	9.5	9	1.05556	0.329861
Q9BPW8	NIPSNAP1	0		0	0	2	16	0.125	0.0403226	0		0	0
O15226	NKRF	5	42	0.119048	0.029036	0		0	0	3.5	42	0.0833333	0.0260417
Q9NVX2	NLE1	9	23	0.391304	0.0954401	5.5	23	0.23913	0.0771388	14	23	0.608696	0.190217
P15531	NME1	2	10	0.2	0.0487805	0		0	0	2	10	0.2	0.0625
Q32Q12	NME1-NME2	0		0	0	7	21	0.333333	0.107527	2.5	21	0.119048	0.0372024
P30419	NMT1	0		0	0	2.5	24	0.104167	0.0336022	0		0	0
Q9ULX3	NOB1	0		0	0	3	24	0.125	0.0403226	0		0	0
Q9Y3T9	NOC2L	22	33	0.666667	0.162602	8	33	0.242424	0.0782014	28	33	0.848485	0.265152
Q8WTT2	NOC3L	30.5	37	0.824324	0.201055	14.5	37	0.391892	0.126417	38	37	1.02703	0.320946
Q9BVI4	NOC4L	14	29	0.482759	0.117746	8.5	29	0.293103	0.0945495	6	29	0.206897	0.0646552
Q9BSC4	NOL10	9	35	0.257143	0.0627178	7	35	0.2	0.0645161	13	35	0.371429	0.116071
Q9H8H0	NOL11	17.5	43	0.406977	0.0992626	0		0	0	9	43	0.209302	0.065407
Q9UGY1	Nol12	41	10	4.1	1	31.5	10	3.1	1	32	10	3.2	1
Q9H6R4	NOL6	18	48	0.375	0.0914634	4.5	48	0.09375	0.0302419	4.5	48	0.09375	0.0292969
Q9UMY1	NOL7	6.5	9	0.722222	0.176152	0		0	0	2.5	9	0.277778	0.0868056
Q5SY16	NOL9	3.5	27	0.12963	0.031617	11	27	0.407407	0.131422	10	27	0.37037	0.115741
Q14978	NOLC1	11.5	33	0.348485	0.0849963	0		0	0	0		0	0
Q5C9Z4	NOM1	0		0	0	6	46	0.130435	0.0420757	3	46	0.0652174	0.0203804
Q15233	NONO	40.5	24	1.6875	0.411585	43	24	1.79167	0.577957	0		0	0
P78316	NOP14	15	43	0.348837	0.0850822	4.5	43	0.104651	0.0337584	2	43	0.0465116	0.0145349
Q9Y3C1	NOP16	12	10	1.2	0.292683	9.5	10	0.95	0.306452	14	10	1.4	0.4375
P46087	NOP2	37	39	0.948718	0.231395	18	39	0.461538	0.148883	37	39	0.948718	0.296474
O00567	NOP56	23	32	0.71875	0.175305	3.5	32	0.109375	0.0352823	14.5	32	0.453125	0.141602
Q9Y2X3	NOP58	21	25	0.84	0.204878	9	25	0.36	0.116129	12	25	0.48	0.15
Q86U38	NOP9	5.5	32	0.171875	0.0419207	2.5	32	0.078125	0.0252016	0		0	0
P06748	NPM1	27.5	12	2.29167	0.558943	11	12	0.916667	0.295699	7.5	12	0.625	0.195312
O95478	NSA2	9	13	0.692308	0.168856	5.5	13	0.423077	0.136476	17	13	1.30769	0.408654
Q08J23	NSUN2	3	44	0.0681818	0.0166297	0		0	0	2.5	44	0.0568182	0.0177557
Q96P11	NSUN5	2.5	26	0.0961538	0.0234522	0		0	0	0		0	0
Q7Z417	NUFIP2	0		0	0	16	32	0.5	0.16129	0		0	0
Q14980	NUMA1	2	121	0.0165289	0.00403145	0		0	0	0		0	0
O75694	NUP155	3	67	0.0447761	0.010921	0		0	0	2.5	67	0.0373134	0.0116604
Q92621	NUP205	2	97	0.0206186	0.00502892	0		0	0	0		0	0
Q8TEM1	NUP210	0		0	0	2.5	84	0.0297619	0.00960061	0		0	0
O15381	NVL	13	47	0.276596	0.0674624	14.5	47	0.308511	0.0995196	34.5	47	0.734043	0.229388
Q9UBU9	NXF1	3.5	32	0.109375	0.0266768	0		0	0	0		0	0
P04181	OAT	4.5	22	0.204545	0.0498891	3.5	22	0.159091	0.0513196	3.5	22	0.159091	0.0497159
P07237	P4HB	3.5	36	0.0972222	0.0237127	3.5	36	0.0972222	0.031362	2	36	0.0555556	0.0173611
Q9UQ80	PA2G4	5	23	0.217391	0.0530223	3.5	23	0.152174	0.0490884	5	23	0.217391	0.0679348
P11940	PABPC1	5.5	33	0.166667	0.0406504	22.5	33	0.681818	0.219941	0		0	0
Q13310	PABPC4	3.5	33	0.106061	0.0258684	11	33	0.333333	0.107527	0		0	0
P22234	PAICS	0		0	0	0		0	0	2	22	0.0909091	0.0284091
Q9NWT1	PAK1IP1	10	19	0.526316	0.12837	5.5	19	0.289474	0.0933786	6	19	0.315789	0.0986842
Q8NDF8	PAPD5	0		0	0	0		0	0	6	29	0.206897	0.0646552
P09874	PARP1	14	56	0.25	0.0609756	17.5	56	0.3125	0.100806	9	56	0.160714	0.0502232
Q15365	PCBP1	3	18	0.166667	0.0406504	0		0	0	0		0	0
Q15366	PCBP2	3	18	0.166667	0.0406504	0		0	0	0		0	0
Q5JVF3	PCID2	2.5	28	0.0892857	0.021777	0		0	0	0		0	0
Q14690	PDCD11	63.5	98	0.647959	0.158039	15	98	0.153061	0.0493746	19	98	0.193878	0.0605867
P30101	PDIA3	0		0	0	5.5	29	0.189655	0.0611791	3	29	0.103448	0.0323276
P13667	PDIA4	0		0	0	0		0	0	2	38	0.0526316	0.0164474
Q15084	PDIA6	4.5	20	0.225	0.054878	2	20	0.1	0.0322581	0		0	0
Q9NTI5	PDS5B	3.5	78	0.0448718	0.0109443	0		0	0	0		0	0
Q8IZL8	PELP1	10	40	0.25	0.0609756	18.5	40	0.4625	0.149194	12.5	40	0.3125	0.0976562
O00541	PES1	38.5	31	1.24194	0.302911	13.5	31	0.435484	0.140479	41.5	31	1.33871	0.418347
Q01813	PFKP	4.5	38	0.118421	0.0288832	3.5	38	0.0921053	0.0297114	2.5	38	0.0657895	0.0205592
P18669	PGAM1	3	13	0.230769	0.0562852	3.5	13	0.269231	0.0868486	3	13	0.230769	0.0721154
Q96HS1	PGAM5	9	17	0.529412	0.129125	7.5	17	0.441176	0.142315	0		0	0
P00558	PGK1	3	24	0.125	0.0304878	4	24	0.166667	0.0537634	2.5	24	0.104167	0.0325521
P35232	PHB	4	17	0.235294	0.0573888	3.5	17	0.205882	0.0664137	0		0	0
Q99623	PHB2	6	20	0.3	0.0731707	4	20	0.2	0.0645161	3.5	20	0.175	0.0546875
O43175	PHGDH	2	25	0.08	0.0195122	2.5	25	0.1	0.0322581	2.5	25	0.1	0.03125
Q8WWQ0	PHIP	0		0	0	0		0	0	3.5	91	0.0384615	0.0120192
P14618	PKM	14	31	0.451613	0.110149	15	31	0.483871	0.156087	9	31	0.290323	0.0907258
Q9H307	PNN	0		0	0	3.5	42	0.0833333	0.0268817	0		0	0
Q9NRX1	PNO1	8.5	13	0.653846	0.159475	6.5	13	0.5	0.16129	0		0	0
P30876	POLR2B	0		0	0	3.5	64	0.0546875	0.0176411	0		0	0
P19388	POLR2E	3.5	13	0.269231	0.065666	0		0	0	0		0	0
Q99575	POP1	5.5	58	0.0948276	0.0231287	0		0	0	0		0	0
A0A0B4J1V8	PPAN-P2RY11	11.5	40	0.2875	0.070122	8.5	40	0.2125	0.0685484	25	40	0.625	0.195312
P62937	PPIA	4.5	8	0.5625	0.137195	4.5	8	0.5625	0.181452	5	8	0.625	0.195312
P36873	PPP1CC	3.5	18	0.194444	0.0474255	3.5	18	0.194444	0.062724	0		0	0
P30153	PPP2R1A	3.5	34	0.102941	0.0251076	3.5	34	0.102941	0.0332068	2	34	0.0588235	0.0183824
P63151	PPP2R2A	0		0	0	2.5	22	0.113636	0.0366569	0		0	0
O43663	PRC1	2.5	34	0.0735294	0.017934	0		0	0	0		0	0
Q06830	PRDX1	0		0	0	0		0	0	3.5	13	0.269231	0.0841346
P32119	PRDX2	0		0	0	0		0	0	2.5	11	0.227273	0.0710227
Q13162	PRDX4	0		0	0	4	15	0.266667	0.0860215	0		0	0
P30041	PRDX6	3	14	0.214286	0.0522648	0		0	0	4	14	0.285714	0.0892857
P78527	PRKDC	31.5	242	0.130165	0.0317476	43	242	0.177686	0.057318	26	242	0.107438	0.0335744
O14744	PRMT5	0		0	0	3	34	0.0882353	0.028463	0		0	0
Q9UMS4	PRPF19	9.5	22	0.431818	0.105322	3	22	0.136364	0.0439883	6	22	0.272727	0.0852273
O43172	PRPF4	0		0	0	2.5	30	0.0833333	0.0268817	0		0	0
O75400	PRPF40A	0		0	0	2	39	0.0512821	0.0165426	0		0	0
Q13523	PRPF4B	4.5	41	0.109756	0.0267698	0		0	0	0		0	0
O94906	PRPF6	12.5	57	0.219298	0.0534874	8	57	0.140351	0.0452745	0		0	0
Q6P2Q9	PRPF8	34	137	0.248175	0.0605305	35.5	137	0.259124	0.0835884	4.5	137	0.0328467	0.0102646
P60891	PRPS1	2	16	0.125	0.0304878	0		0	0	0		0	0
Q9Y520	PRRC2C	0		0	0	5.5	123	0.0447154	0.0144243	0		0	0
P60900	PSMA6	2	14	0.142857	0.0348432	3	14	0.214286	0.0691244	0		0	0
P62195	PSMC5	3	24	0.125	0.0304878	4.5	24	0.1875	0.0604839	0		0	0
Q13200	PSMD2	0		0	0	4	52	0.0769231	0.0248139	2	52	0.0384615	0.0120192
O43242	PSMD3	0		0	0	3.5	34	0.102941	0.0332068	0		0	0
Q8WXF1	PSPC1	9	26	0.346154	0.0844278	2.5	26	0.0961538	0.0310174	0		0	0
P26599	PTBP1	7	23	0.304348	0.0742312	0		0	0	0		0	0
Q96EY7	PTCD3	18	39	0.461538	0.11257	11.5	39	0.294872	0.0951199	11	39	0.282051	0.088141
Q9P035	PTPLAD1	3	17	0.176471	0.0430416	3.5	17	0.205882	0.0664137	4.5	17	0.264706	0.0827206
Q13610	PWP1	0		0	0	0		0	0	6	21	0.285714	0.0892857
Q15269	PWP2	15.5	47	0.329787	0.0804359	9.5	47	0.202128	0.0652025	8.5	47	0.180851	0.056516
Q96C36	PYCR2	0		0	0	2.5	14	0.178571	0.0576037	0		0	0
P47897	QARS	12	51	0.235294	0.0573888	8	51	0.156863	0.0506009	0		0	0
P61026	RAB10	2.5	13	0.192308	0.0469043	0		0	0	3	13	0.230769	0.0721154
P51149	RAB7A	0		0	0	2	17	0.117647	0.0379507	0		0	0
Q9H0H5	RACGAP1	3	36	0.0833333	0.0203252	0		0	0	0		0	0
Q9UKM9	RALY	0		0	0	7	18	0.388889	0.125448	5.5	18	0.305556	0.0954861
P62826	RAN	3	12	0.25	0.0609756	0		0	0	0		0	0
P49792	RANBP2	0		0	0	3	186	0.016129	0.00520291	0		0	0
P61224	RAP1B	0		0	0	2.5	10	0.25	0.0806452	0		0	0
P54136	RARS	10	39	0.25641	0.0625391	5	39	0.128205	0.0413565	2.5	39	0.0641026	0.0200321
Q16576	RBBP7	0		0	0	4	20	0.2	0.0645161	3.5	20	0.175	0.0546875
Q96PK6	RBM14	15	26	0.576923	0.140713	5	26	0.192308	0.0620347	0		0	0
Q9Y4C8	RBM19	2.5	51	0.0490196	0.011956	0		0	0	0		0	0
Q9NW13	RBM28	16	36	0.444444	0.108401	7	36	0.194444	0.062724	18.5	36	0.513889	0.16059
P42696	RBM34	5	24	0.208333	0.050813	2	24	0.0833333	0.0268817	16	24	0.666667	0.208333
P38159	RBMX	5.5	22	0.25	0.0609756	22.5	22	1.02273	0.329912	0		0	0
Q9Y2P8	RCL1	8	21	0.380952	0.0929152	3.5	21	0.166667	0.0537634	4	21	0.190476	0.0595238
P46063	RECQL	3	36	0.0833333	0.0203252	0		0	0	0		0	0
Q9GZR2	REXO4	8.5	26	0.326923	0.0797373	0		0	0	0		0	0
Q9H9Y2	RPF1	10.5	16	0.65625	0.160061	0		0	0	22	16	1.375	0.429688
Q9H7B2	RPF2	16	15	1.06667	0.260163	9	15	0.6	0.193548	18	15	1.2	0.375
P27635	RPL10	8	8	1	0.243902	11	8	1.375	0.443548	10.5	8	1.3125	0.410156
P62906	RPL10A	17.5	13	1.34615	0.32833	9	13	0.692308	0.223325	14	13	1.07692	0.336538
P62913	RPL11	4.5	8	0.5625	0.137195	7	8	0.875	0.282258	4.5	8	0.5625	0.175781
P30050	RPL12	12	7	1.71429	0.418118	14.5	7	2.07143	0.668203	13	7	1.85714	0.580357
P26373	RPL13	22	11	2	0.487805	38	11	3.45455	1.11437	36.5	11	3.31818	1.03693
P40429	RPL13A	15	10	1.5	0.365854	32.5	10	3.25	1.04839	41.5	10	4.15	1.29688
P50914	RPL14	7	7	1	0.243902	10.5	7	1.5	0.483871	10	7	1.42857	0.446429
P61313	RPL15	14	12	1.16667	0.284553	19.5	12	1.625	0.524194	18	12	1.5	0.46875
P18621	RPL17	19.5	8	2.4375	0.594512	34	8	4.25	1.37097	40	8	5	1.5625
Q07020	RPL18	10.5	7	1.5	0.365854	13.5	7	1.92857	0.62212	17.5	7	2.5	0.78125
Q02543	RPL18A	10	12	0.833333	0.203252	8.5	12	0.708333	0.228495	12.5	12	1.04167	0.325521
P84098	RPL19	8	5	1.6	0.390244	6.5	5	1.3	0.419355	11	5	2.2	0.6875
P46778	RPL21	11	7	1.57143	0.383275	20	7	2.85714	0.921659	19	7	2.71429	0.848214
P35268	RPL22	5.5	5	1.1	0.268293	4	5	0.8	0.258065	2.5	5	0.5	0.15625
P62829	RPL23	9.5	8	1.1875	0.289634	24	8	3	0.967742	6	8	0.75	0.234375
P62750	RPL23A	12.5	6	2.08333	0.50813	25	6	4.16667	1.34409	16	6	2.66667	0.833333
P83731	RPL24	4	8	0.5	0.121951	7	8	0.875	0.282258	3	8	0.375	0.117188
P61254	RPL26	12	7	1.71429	0.418118	12.5	7	1.78571	0.576037	12.5	7	1.78571	0.558036
P61353	RPL27	5.5	5	1.1	0.268293	14.5	5	2.9	0.935484	8	5	1.6	0.5
P46776	RPL27A	5	7	0.714286	0.174216	6.5	7	0.928571	0.299539	6.5	7	0.928571	0.290179
P46779	RPL28	18.5	8	2.3125	0.564024	13	8	1.625	0.524194	22	8	2.75	0.859375
P47914	RPL29	3	4	0.75	0.182927	4	4	1	0.322581	3.5	4	0.875	0.273438
P39023	RPL3	37.5	19	1.97368	0.481386	44	19	2.31579	0.747029	35.5	19	1.86842	0.583882
P62888	RPL30	10.5	6	1.75	0.426829	13	6	2.16667	0.698925	11.5	6	1.91667	0.598958
P62899	RPL31	5.5	7	0.785714	0.191638	11.5	7	1.64286	0.529954	6	7	0.857143	0.267857
P62910	RPL32	11.5	7	1.64286	0.400697	17.5	7	2.5	0.806452	23.5	7	3.35714	1.04911
P49207	RPL34	9.5	6	1.58333	0.386179	3	6	0.5	0.16129	4.5	6	0.75	0.234375
P42766	RPL35	6.5	4	1.625	0.396341	8	4	2	0.645161	6.5	4	1.625	0.507812
P18077	RPL35A	9	7	1.28571	0.313589	11.5	7	1.64286	0.529954	18.5	7	2.64286	0.825893
Q9Y3U8	RPL36	5.5	3	1.83333	0.447154	9.5	3	3.16667	1.02151	8.5	3	2.83333	0.885417
Q969Q0	RPL36AL	2	4	0.5	0.121951	4.5	4	1.125	0.362903	5	4	1.25	0.390625
P61927	RPL37	0		0	0	0		0	0	2	4	0.5	0.15625
P61513	RPL37A	4	4	1	0.243902	17	4	4.25	1.37097	17	4	4.25	1.32812
P63173	RPL38	6.5	3	2.16667	0.528455	8	3	2.66667	0.860215	4	3	1.33333	0.416667
P36578	RPL4	22	17	1.29412	0.315638	31.5	17	1.85294	0.597723	40	17	2.35294	0.735294
P46777	RPL5	23.5	13	1.80769	0.440901	16	13	1.23077	0.397022	17	13	1.30769	0.408654
Q02878	RPL6	30.5	15	2.03333	0.495935	33	15	2.2	0.709677	44	15	2.93333	0.916667
P18124	RPL7	20	13	1.53846	0.375235	26	13	2	0.645161	31.5	13	2.42308	0.757212
P62424	RPL7A	16.5	12	1.375	0.335366	18.5	12	1.54167	0.497312	23.5	12	1.95833	0.611979
Q6DKI1	RPL7L1	17	14	1.21429	0.296167	8	14	0.571429	0.184332	23.5	14	1.67857	0.524554
P62917	RPL8	10.5	8	1.3125	0.320122	16	8	2	0.645161	21	8	2.625	0.820312
P32969	RPL9	11.5	8	1.4375	0.35061	20	8	2.5	0.806452	8	8	1	0.3125
P05388	RPLP0	17	16	1.0625	0.259146	27	16	1.6875	0.544355	23.5	16	1.46875	0.458984
P05387	RPLP2	12	6	2	0.487805	14	6	2.33333	0.752688	14.5	6	2.41667	0.755208
P04843	RPN1	3.5	35	0.1	0.0243902	6	35	0.171429	0.0552995	5	35	0.142857	0.0446429
P04844	RPN2	3	28	0.107143	0.0261324	5.5	28	0.196429	0.0633641	3	28	0.107143	0.0334821
P78346	RPP30	2	16	0.125	0.0304878	0		0	0	0		0	0
P46783	RPS10	7.5	10	0.75	0.182927	33	10	3.3	1.06452	0		0	0
P62280	RPS11	6	9	0.666667	0.162602	9	9	1	0.322581	8	9	0.888889	0.277778
P62277	RPS13	15	9	1.66667	0.406504	35	9	3.88889	1.25448	30	9	3.33333	1.04167
P62263	RPS14	8	5	1.6	0.390244	10.5	5	2.1	0.677419	5.5	5	1.1	0.34375
P62841	RPS15	9	6	1.5	0.365854	14	6	2.33333	0.752688	7	6	1.16667	0.364583
P62244	RPS15A	8.5	8	1.0625	0.259146	12.5	8	1.5625	0.504032	2.5	8	0.3125	0.0976562
P62249	RPS16	8	10	0.8	0.195122	21.5	10	2.15	0.693548	7	10	0.7	0.21875
P08708	RPS17L	9.5	6	1.58333	0.386179	10.5	6	1.75	0.564516	4	6	0.666667	0.208333
P62269	RPS18	9	11	0.818182	0.199557	10.5	11	0.954545	0.307918	4	11	0.363636	0.113636
P39019	RPS19	18.5	8	2.3125	0.564024	17.5	8	2.1875	0.705645	0		0	0
P15880	RPS2	14	16	0.875	0.213415	30	16	1.875	0.604839	10.5	16	0.65625	0.205078
P60866	RPS20	5.5	5	1.1	0.268293	4	5	0.8	0.258065	0		0	0
P62266	RPS23	3.5	6	0.583333	0.142276	4.5	6	0.75	0.241935	5.5	6	0.916667	0.286458
P62847	RPS24	7	4	1.75	0.426829	14.5	4	3.625	1.16935	10.5	4	2.625	0.820312
P62851	RPS25	6	5	1.2	0.292683	4	5	0.8	0.258065	5	5	1	0.3125
P62854	RPS26	5.5	5	1.1	0.268293	12.5	5	2.5	0.806452	10	5	2	0.625
P42677	RPS27	0		0	0	5.5	4	1.375	0.443548	0		0	0
P23396	RPS3	8	18	0.444444	0.108401	27.5	18	1.52778	0.492832	4	18	0.222222	0.0694444
P61247	RPS3A	23.5	17	1.38235	0.337159	34.5	17	2.02941	0.654649	22.5	17	1.32353	0.413603
P62701	RPS4X	26	17	1.52941	0.373027	29.5	17	1.73529	0.559772	15.5	17	0.911765	0.284926
P46782	RPS5	14.5	10	1.45	0.353659	14	10	1.4	0.451613	0		0	0
P62753	RPS6	16.5	8	2.0625	0.503049	31.5	8	3.9375	1.27016	17	8	2.125	0.664062
P62081	RPS7	19	11	1.72727	0.421286	28	11	2.54545	0.821114	2	11	0.181818	0.0568182
P62241	RPS8	15.5	10	1.55	0.378049	20	10	2	0.645161	17.5	10	1.75	0.546875
P46781	RPS9	11	11	1	0.243902	24.5	11	2.22727	0.718475	23.5	11	2.13636	0.667614
P08865	RPSA	0		0	0	2	14	0.142857	0.0460829	3.5	14	0.25	0.078125
P05386	RRP1	23	4	5.75	1.40244	6	4	1.5	0.483871	38	4	9.5	2.96875
Q5JTH9	RRP12	23	66	0.348485	0.0849963	23.5	66	0.356061	0.114858	6	66	0.0909091	0.0284091
Q9Y3B9	RRP15	9	14	0.642857	0.156794	4.5	14	0.321429	0.103687	15.5	14	1.10714	0.345982
Q14684	RRP1B	22.5	37	0.608108	0.148319	3.5	37	0.0945946	0.0305144	11	37	0.297297	0.0929054
Q96EU6	RRP36	2.5	17	0.147059	0.035868	0		0	0	0		0	0
Q9Y3A4	RRP7A	5	12	0.416667	0.101626	0		0	0	0		0	0
O43159	RRP8	2.5	24	0.104167	0.0254065	0		0	0	2	24	0.0833333	0.0260417
O43818	RRP9	3	26	0.115385	0.0281426	0		0	0	0		0	0
Q15050	RRS1	35	21	1.66667	0.406504	18	21	0.857143	0.276498	40	21	1.90476	0.595238
O76021	RSL1D1	61.5	23	2.67391	0.652174	22	23	0.956522	0.308555	50.5	23	2.19565	0.686141
Q9UHA3	RSL24D1	5.5	4	1.375	0.335366	0		0	0	7.5	4	1.875	0.585938
Q9Y3I0	RTCB	8	27	0.296296	0.0722674	27	27	1	0.322581	10	27	0.37037	0.115741
Q9Y265	RUVBL1	7.5	22	0.340909	0.0831486	8	22	0.363636	0.117302	6	22	0.272727	0.0852273
Q9Y230	RUVBL2	4.5	27	0.166667	0.0406504	4.5	27	0.166667	0.0537634	5	27	0.185185	0.0578704
O00422	SAP18	2.5	12	0.208333	0.050813	3	12	0.25	0.0806452	0		0	0
O43290	SART1	2.5	40	0.0625	0.0152439	5.5	40	0.1375	0.0443548	0		0	0
Q9NVU7	SDAD1	2	40	0.05	0.0121951	6.5	40	0.1625	0.0524194	0		0	0
Q96EE3	SEH1L	2	21	0.0952381	0.0232288	0		0	0	0		0	0
Q9H4L4	SENP3	6	26	0.230769	0.0562852	10.5	26	0.403846	0.130273	5.5	26	0.211538	0.0661058
Q8NC51	SERBP1	16	21	0.761905	0.18583	15	21	0.714286	0.230415	0		0	0
O75533	SF3B1	5.5	65	0.0846154	0.0206379	0		0	0	3	65	0.0461538	0.0144231
Q13435	SF3B2	6	48	0.125	0.0304878	0		0	0	0		0	0
Q15393	SF3B3	3	62	0.0483871	0.0118017	0		0	0	0		0	0
P23246	SFPQ	43.5	30	1.45	0.353659	44	30	1.46667	0.473118	0		0	0
Q9H9B4	SFXN1	0		0	0	4	19	0.210526	0.0679117	3	19	0.157895	0.0493421
P34897	SHMT2	8.5	31	0.274194	0.0668765	5	31	0.16129	0.0520291	0		0	0
Q15477	SKIV2L	0		0	0	2	67	0.0298507	0.00962927	0		0	0
P42285	SKIV2L2	16	56	0.285714	0.0696864	14.5	56	0.258929	0.0835253	3	56	0.0535714	0.0167411
P53007	SLC25A1	4	16	0.25	0.0609756	2	16	0.125	0.0403226	0		0	0
Q02978	SLC25A11	3	19	0.157895	0.0385109	4	19	0.210526	0.0679117	4	19	0.210526	0.0657895
Q9UJS0	SLC25A13	5.5	34	0.161765	0.0394548	6	34	0.176471	0.056926	0		0	0
Q00325	SLC25A3	4.5	21	0.214286	0.0522648	8.5	21	0.404762	0.130568	4	21	0.190476	0.0595238
P05141	SLC25A5	0		0	0	0		0	0	2	19	0.105263	0.0328947
P51532	SMARCA4	4	72	0.0555556	0.0135501	0		0	0	3.5	72	0.0486111	0.015191
O60264	SMARCA5	4	65	0.0615385	0.0150094	2.5	65	0.0384615	0.0124069	2.5	65	0.0384615	0.0120192
Q14683	SMC1A	21.5	75	0.286667	0.0699187	8	75	0.106667	0.0344086	0		0	0
O95347	SMC2	4.5	67	0.0671642	0.0163815	2.5	67	0.0373134	0.0120366	0		0	0
Q9UQE7	SMC3	32.5	72	0.451389	0.110095	10.5	72	0.145833	0.047043	0		0	0
Q9NTJ3	SMC4	5	73	0.0684932	0.0167056	0		0	0	0		0	0
Q8IY18	SMC5	2.5	61	0.0409836	0.009996	0		0	0	0		0	0
Q96SB8	SMC6	5	64	0.078125	0.0190549	0		0	0	0		0	0
A6NHR9	SMCHD1	5	115	0.0434783	0.0106045	2.5	115	0.0217391	0.00701262	0		0	0
Q16637	SMN2	2.5	11	0.227273	0.0554324	0		0	0	2	11	0.181818	0.0568182
Q2TAY7	SMU1	4	30	0.133333	0.0325203	0		0	0	0		0	0
Q7KZF4	SND1	4	55	0.0727273	0.0177384	15.5	55	0.281818	0.0909091	3	55	0.0545455	0.0170455
O75643	SNRNP200	43.5	122	0.356557	0.0869652	37.5	122	0.307377	0.0991539	7	122	0.057377	0.0179303
P08621	SNRNP70	0		0	0	0		0	0	3.5	19	0.184211	0.0575658
P09661	SNRPA1	0		0	0	4	12	0.333333	0.107527	0		0	0
P08579	SNRPB2	3	11	0.272727	0.0665188	2.5	11	0.227273	0.0733138	0		0	0
Q13573	SNW1	2.5	27	0.0925926	0.0225836	0		0	0	0		0	0
P18583	SON	3.5	79	0.0443038	0.0108058	0		0	0	5.5	79	0.0696203	0.0217563
Q8NB90	SPATA5	11	52	0.211538	0.0515947	4.5	52	0.0865385	0.0279156	6.5	52	0.125	0.0390625
Q9BVQ7	SPATA5L1	9	41	0.219512	0.0535396	5	41	0.121951	0.0393391	4	41	0.097561	0.0304878
Q01082	SPTBN1	0		0	0	3	145	0.0206897	0.00667408	0		0	0
Q8NEF9	SRFBP1	2	24	0.0833333	0.0203252	0		0	0	0		0	0
P37108	SRP14	5	6	0.833333	0.203252	0		0	0	0		0	0
Q9UHB9	SRP68	2.5	39	0.0641026	0.0156348	18	39	0.461538	0.148883	0		0	0
O76094	SRP72	3	36	0.0833333	0.0203252	18	36	0.5	0.16129	0		0	0
P49458	SRP9	2	7	0.285714	0.0696864	2	7	0.285714	0.0921659	0		0	0
Q96SB4	SRPK1	5.5	31	0.177419	0.043273	7	31	0.225806	0.0728408	0		0	0
P78362	SRPK2	2.5	34	0.0735294	0.017934	2.5	34	0.0735294	0.0237192	0		0	0
P08240	SRPR	2.5	36	0.0694444	0.0169377	3.5	36	0.0972222	0.031362	0		0	0
Q8IYB3	SRRM1	0		0	0	0		0	0	3	41	0.0731707	0.0228659
Q07955	SRSF1	8.5	13	0.653846	0.159475	0		0	0	0		0	0
O75494	SRSF10	0		0	0	2.5	11	0.227273	0.0733138	0		0	0
P84103	SRSF3	4.5	6	0.75	0.182927	0		0	0	0		0	0
Q13243	SRSF5	3	7	0.428571	0.10453	0		0	0	0		0	0
Q16629	SRSF7	5.5	10	0.55	0.134146	0		0	0	0		0	0
P05455	SSB	2	23	0.0869565	0.0212089	0		0	0	0		0	0
P31391	SSR4	2	11	0.181818	0.0443459	3	11	0.272727	0.0879765	0		0	0
Q08945	SSRP1	2.5	33	0.0757576	0.0184775	3.5	33	0.106061	0.0342131	8	33	0.242424	0.0757576
Q8N3U4	STAG2	2.5	64	0.0390625	0.00952744	0		0	0	0		0	0
O95793	STAU1	17.5	30	0.583333	0.142276	9.5	30	0.316667	0.102151	6.5	30	0.216667	0.0677083
Q9Y3F4	STRAP	2	23	0.0869565	0.0212089	2.5	23	0.108696	0.0350631	0		0	0
P46977	STT3A	2.5	37	0.0675676	0.0164799	2.5	37	0.0675676	0.021796	0		0	0
Q9Y5B9	SUPT16H	4.5	59	0.0762712	0.0186027	3.5	59	0.059322	0.0191361	17	59	0.288136	0.0900424
O15260	SURF4	3	12	0.25	0.0609756	3	12	0.25	0.0806452	0		0	0
O75683	SURF6	4.5	13	0.346154	0.0844278	4	13	0.307692	0.0992556	12.5	13	0.961538	0.300481
O60506	SYNCRIP	4.5	30	0.15	0.0365854	0		0	0	4	30	0.133333	0.0416667
P26639	TARS	2	43	0.0465116	0.0113443	3.5	43	0.0813953	0.0262566	5.5	43	0.127907	0.0399709
Q9Y4P3	TBL2	2	27	0.0740741	0.0180668	2.5	27	0.0925926	0.0298686	0		0	0
Q12788	TBL3	24	48	0.5	0.121951	11	48	0.229167	0.0739247	14	48	0.291667	0.0911458
Q13428	TCOF1	15.5	63	0.246032	0.0600077	0		0	0	0		0	0
P17987	TCP1	9.5	32	0.296875	0.0724085	6	32	0.1875	0.0604839	6	32	0.1875	0.0585938
Q9NZ01	TECR	5	17	0.294118	0.071736	5	17	0.294118	0.0948767	0		0	0
Q9NXF1	TEX10	16	54	0.296296	0.0722674	31	54	0.574074	0.185185	16	54	0.296296	0.0925926
Q8NI27	THOC2	8.5	79	0.107595	0.0262427	2.5	79	0.0316456	0.0102082	0		0	0
Q86W42	THOC6	3.5	19	0.184211	0.0449294	0		0	0	0		0	0
Q9Y2W1	THRAP3	2	44	0.0454545	0.0110865	0		0	0	0		0	0
Q3ZCQ8	TIMM50	5	16	0.3125	0.0762195	5.5	16	0.34375	0.110887	6.5	16	0.40625	0.126953
Q16832	TKT	2.5	36	0.0694444	0.0169377	7.5	36	0.208333	0.0672043	4.5	36	0.125	0.0390625
P42166	TMPO	2.5	37	0.0675676	0.0164799	0		0	0	3.5	37	0.0945946	0.0295608
P11387	TOP1	0		0	0	0		0	0	2	42	0.047619	0.014881
P11388	TOP2A	9	83	0.108434	0.0264473	6	83	0.0722892	0.0233191	18	83	0.216867	0.0677711
Q02880	TOP2B	0		0	0	0		0	0	3.5	90	0.0388889	0.0121528
P04637	TP53	2.5	21	0.119048	0.029036	0		0	0	0		0	0
P62995	TRA2B	4	11	0.363636	0.0886918	0		0	0	2.5	11	0.227273	0.0710227
Q8WUH2	TRAP1	0		0	0	2.5	43	0.0581395	0.0187547	0		0	0
Q14258	TRIM25	6	35	0.171429	0.0418118	0		0	0	0		0	0
Q13263	TRIM28	0		0	0	0		0	0	4	35	0.114286	0.0357143
Q7Z2T5	TRMT1L	2.5	40	0.0625	0.0152439	0		0	0	0		0	0
P10155	TROVE2	3	29	0.103448	0.0252313	0		0	0	0		0	0
Q2NL82	TSR1	9	36	0.25	0.0609756	14.5	36	0.402778	0.129928	0		0	0
P68363	TUBA1B	0		0	0	21	24	0.875	0.282258	23.5	24	0.979167	0.30599
A6NHL2	TUBAL3	5	26	0.192308	0.0469043	0		0	0	0		0	0
P07437	TUBB	3	23	0.130435	0.0318134	2	23	0.0869565	0.0280505	0		0	0
Q9BVA1	TUBB2B	0		0	0	0		0	0	4.5	23	0.195652	0.0611413
P68371	TUBB4B	2	23	0.0869565	0.0212089	4.5	23	0.195652	0.0631136	2.5	23	0.108696	0.0339674
Q9BUF5	TUBB6	0		0	0	4	23	0.173913	0.056101	2	23	0.0869565	0.0271739
Q9BSJ2	TUBGCP2	4.5	55	0.0818182	0.0199557	0		0	0	0		0	0
P49411	TUFM	5	31	0.16129	0.0393391	3.5	31	0.112903	0.0364204	0		0	0
P40222	TXLNA	0		0	0	2	30	0.0666667	0.0215054	0		0	0
Q9NUQ3	TXLNG	0		0	0	2.5	28	0.0892857	0.0288018	0		0	0
P22314	UBA1	5	58	0.0862069	0.0210261	10.5	58	0.181034	0.0583982	10.5	58	0.181034	0.0565733
P0CG47	UBB	2	15	0.133333	0.0325203	0		0	0	0		0	0
P09936	UCHL1	0		0	0	2	11	0.181818	0.058651	2.5	11	0.227273	0.0710227
O60287	URB1	8.5	122	0.0696721	0.0169932	7.5	122	0.0614754	0.0198308	0		0	0
Q14146	URB2	5.5	80	0.06875	0.0167683	2.5	80	0.03125	0.0100806	0		0	0
Q8NFA0	USP10	2	80	0.025	0.00609756	6.5	80	0.08125	0.0262097	0		0	0
Q9P275	USP36	3	66	0.0454545	0.0110865	0		0	0	0		0	0
Q53GS9	USP39	12.5	30	0.416667	0.101626	9.5	30	0.316667	0.102151	0		0	0
Q9Y3A2	UTP11L	4	12	0.333333	0.0813008	0		0	0	2.5	12	0.208333	0.0651042
Q9BVJ6	UTP14A	22	41	0.536585	0.130874	3	41	0.0731707	0.0236035	6	41	0.146341	0.0457317
Q8TED0	UTP15	16.5	32	0.515625	0.125762	2.5	32	0.078125	0.0252016	11.5	32	0.359375	0.112305
Q9Y5J1	UTP18	15	28	0.535714	0.130662	4.5	28	0.160714	0.0518433	6.5	28	0.232143	0.0725446
O75691	UTP20	28.5	146	0.195205	0.0476111	3.5	146	0.0239726	0.0077331	3	146	0.0205479	0.00642123
Q9NQZ2	UTP3	10.5	16	0.65625	0.160061	2	16	0.125	0.0403226	0		0	0
Q9NYH9	UTP6	12.5	40	0.3125	0.0762195	0		0	0	6	40	0.15	0.046875
P26640	VARS	0		0	0	2.5	65	0.0384615	0.0124069	0		0	0
P55072	VCP	5.5	44	0.125	0.0304878	10.5	44	0.238636	0.0769795	4	44	0.0909091	0.0284091
P21796	VDAC1	5	17	0.294118	0.071736	7	17	0.411765	0.132827	7.5	17	0.441176	0.137868
P45880	VDAC2	4.5	16	0.28125	0.0685976	4.5	16	0.28125	0.0907258	3	16	0.1875	0.0585938
Q9Y277	VDAC3	4	16	0.25	0.0609756	4	16	0.25	0.0806452	3	16	0.1875	0.0585938
P04004	VTN	0		0	0	0		0	0	3	22	0.136364	0.0426136
Q9GZL7	WDR12	17.5	23	0.76087	0.185578	7.5	23	0.326087	0.105189	27	23	1.17391	0.366848
Q9BV38	WDR18	10.5	22	0.477273	0.116408	11	22	0.5	0.16129	6	22	0.272727	0.0852273
Q9UNX4	WDR3	26	49	0.530612	0.129418	11	49	0.22449	0.0724161	14	49	0.285714	0.0892857
Q8NI36	WDR36	30.5	49	0.622449	0.151817	16	49	0.326531	0.105332	12	49	0.244898	0.0765306
Q15061	WDR43	16	34	0.470588	0.114778	2	34	0.0588235	0.0189753	7	34	0.205882	0.0643382
O15213	WDR46	15	32	0.46875	0.114329	0		0	0	7	32	0.21875	0.0683594
Q9H6Y2	WDR55	0		0	0	0		0	0	3	21	0.142857	0.0446429
Q6RFH5	WDR74	7.5	19	0.394737	0.0962773	0		0	0	11.5	19	0.605263	0.189145
Q8IWA0	WDR75	16.5	48	0.34375	0.0838415	4	48	0.0833333	0.0268817	12.5	48	0.260417	0.0813802
O96028	WHSC1	0		0	0	0		0	0	2	72	0.0277778	0.00868056
O14980	XPO1	0		0	0	3	56	0.0535714	0.0172811	0		0	0
P13010	XRCC5	3.5	40	0.0875	0.0213415	9	40	0.225	0.0725806	5.5	40	0.1375	0.0429688
P12956	XRCC6	7.5	35	0.214286	0.0522648	14	35	0.4	0.129032	8	35	0.228571	0.0714286
Q9H0D6	XRN2	5.5	52	0.105769	0.0257974	0		0	0	2.5	52	0.0480769	0.015024
Q9H6S0	YTHDC2	4	79	0.0506329	0.0123495	6	79	0.0759494	0.0244998	0		0	0
P62258	YWHAE	4	17	0.235294	0.0573888	3.5	17	0.205882	0.0664137	3	17	0.176471	0.0551471
O95625	ZBTB11	0		0	0	0		0	0	3	51	0.0588235	0.0183824
Q9NUD5	ZCCHC3	0		0	0	8.5	25	0.34	0.109677	0		0	0
Q9Y2G7	ZFP30	0		0	0	0		0	0	3	29	0.103448	0.0323276
Q5BKZ1	ZNF326	0		0	0	4	31	0.129032	0.0416233	5.5	31	0.177419	0.0554435
Q96ME7	ZNF512	0		0	0	0		0	0	3	27	0.111111	0.0347222
Q86UK7	ZNF598	3.5	43	0.0813953	0.0198525	0		0	0	0		0	0

## Sheet: Table S3
H. sapiens ortholog	Aliases	Description	Percentage of co-purified proteins normalize to Nol12
			100 mM NaCl	100 mM NaCl + RNAse A	300 mM NaCl + RNAse A
LSU proteins
RPL10	XX-FW83563B9.1, AUTSX5, DXS648, DXS648E, L10, NOV, QM	ribosomal protein L10	0.243902	0.443548	0.410156
RPL10A	CSA19, Csa-19, L10A, NEDD6	ribosomal protein L10a	0.32833	0.223325	0.336538
RPL11	RP11-223J15.3, DBA7, GIG34, L11	ribosomal protein L11	0.137195	0.282258	0.175781
RPL12	L12	ribosomal protein L12	0.418118	0.668203	0.580357
RPL13	OK/SW-cl.46, BBC1, D16S444E, D16S44E, L13	ribosomal protein L13	0.487805	1.11437	1.03693
RPL13A	L13A, TSTA1	ribosomal protein L13a	0.365854	1.04839	1.29688
RPL14	CAG-ISL-7, CTG-B33, L14, RL14, hRL14	ribosomal protein L14	0.243902	0.483871	0.446429
RPL15	TCBAP0781, DBA12, EC45, L15, RPL10, RPLY10, RPYL10	ribosomal protein L15	0.284553	0.524194	0.46875
RPL17	L17, PD-1, RPL23	ribosomal protein L17	0.594512	1.37097	1.5625
RPL18	L18	ribosomal protein L18	0.365854	0.62212	0.78125
RPL18A	L18A	ribosomal protein L18a	0.203252	0.228495	0.325521
RPL19	L19	ribosomal protein L19	0.390244	0.419355	0.6875
RPL21	RP11-428O18.5, HYPT12, L21	ribosomal protein L21	0.383275	0.921659	0.848214
RPL22	EAP, HBP15, HBP15/L22, L22	ribosomal protein L22	0.268293	0.258065	0.15625
RPL23	L23, rpL17	ribosomal protein L23	0.289634	0.967742	0.234375
RPL23A	L23A, MDA20	ribosomal protein L23a	0.50813	1.34409	0.833333
RPL24	HEL-S-310, L24	ribosomal protein L24	0.121951	0.282258	0.117188
RPL26	DBA11, L26	ribosomal protein L26	0.418118	0.576037	0.558036
RPL27	L27	ribosomal protein L27	0.268293	0.935484	0.5
RPL27A	L27A	ribosomal protein L27a	0.174216	0.299539	0.290179
RPL28	L28	ribosomal protein L28	0.564024	0.524194	0.859375
RPL29	HIP, HUMRPL29, L29P10, RPL29_3_370, RPL29	ribosomal protein L29	0.182927	0.322581	0.273438
RPL3	OK/SW-cl.32, ASC-1, L3, TARBP-B	ribosomal protein L3	0.481386	0.747029	0.583882
RPL30	L30	ribosomal protein L30	0.426829	0.698925	0.598958
RPL31	L31	ribosomal protein L31	0.191638	0.529954	0.267857
RPL32	PP9932, L32	ribosomal protein L32	0.400697	0.806452	1.04911
RPL34	L34	ribosomal protein L34	0.386179	0.16129	0.234375
RPL35	RP11-175D17.6, L35	ribosomal protein L35	0.396341	0.645161	0.507812
RPL35A	GIG33, DBA5, L35A	ribosomal protein L35a	0.313589	0.529954	0.825893
RPL36	L36	ribosomal protein L36	0.447154	1.02151	0.885417
RPL36AL	RP1-164F3.1, L36A, L44L, MIG6, RPL44	ribosomal protein L36a like	0.121951	0.362903	0.390625
RPL37	L37	ribosomal protein L37	0	0	0.15625
RPL37A	L37A	ribosomal protein L37a	0.243902	1.37097	1.32812
RPL38	L38	ribosomal protein L38	0.528455	0.860215	0.416667
RPL4	L4	ribosomal protein L4	0.315638	0.597723	0.735294
RPL5		ribosomal protein L5	0.440901	0.397022	0.408654
RPL6	L6, SHUJUN-2, TAXREB107, TXREB1	ribosomal protein L6	0.495935	0.709677	0.916667
RPL7	L7, humL7-1	ribosomal protein L7	0.375235	0.645161	0.757212
RPL7A	RP11-244N20.10-004, L7A, SURF3, TRUP	ribosomal protein L7a	0.335366	0.497312	0.611979
RPL7L1	dJ475N16.4	ribosomal protein L7a like 1	0.296167	0.184332	0.524554
RPL8	L8	ribosomal protein L8	0.320122	0.645161	0.820312
RPL9	OK/SW-cl.103, L9, NPC-A-16	ribosomal protein L9	0.35061	0.806452	0.3125
RPLP0	L10E, LP0, P0, PRLP0, RPP0	ribosomal protein lateral stalk subunit P0	0.259146	0.544355	0.458984
RPLP2	D11S2243E, LP2, P2, RPP2	ribosomal protein lateral stalk subunit P2	0.487805	0.752688	0.755208
SSU proteins
GNB2L1	HLC7, Gnb2-rs1, H12.3, HLC-7, PIG21, RACK1	receptor of activated protein C kinase 1	0	0.104839	0.0625
RPS10	RP11-375E1__A.4, DBA9, S10	ribosomal protein S10	0.182927	1.06452	0
RPS11	S11	ribosomal protein S11	0.162602	0.322581	0.277778
RPS13	S13	ribosomal protein S13	0.406504	1.25448	1.04167
RPS14	PRO2640, EMTB, S14	ribosomal protein S14	0.390244	0.677419	0.34375
RPS15	RIG, S15	ribosomal protein S15	0.365854	0.752688	0.364583
RPS15A	OK/SW-cl.82, S15a	ribosomal protein S15a	0.259146	0.504032	0.0976562
RPS16	S16	ribosomal protein S16	0.195122	0.693548	0.21875
RPS17L	DBA4L, RPS17L1, RPS17L2, S17, RPS17	ribosomal protein S17 like	0.386179	0.564516	0.208333
RPS18	DADB-159G18.1, D6S218E, HKE3, KE-3, KE3, S18	ribosomal protein S18	0.199557	0.307918	0.113636
RPS19	DBA, DBA1, S19	ribosomal protein S19	0.564024	0.705645	0
RPS2	LLREP3, S2	ribosomal protein S2	0.213415	0.604839	0.205078
RPS20	S20	ribosomal protein S20	0.268293	0.258065	0
RPS23	S23	ribosomal protein S23	0.142276	0.241935	0.286458
RPS24	RP11-6P10.1, DBA3, S24	ribosomal protein S24	0.426829	1.16935	0.820312
RPS25	S25	ribosomal protein S25	0.292683	0.258065	0.3125
RPS26	RP11-151A6.3, DBA10, S26	ribosomal protein S26	0.268293	0.806452	0.625
RPS27	RP11-422P24.3, MPS-1, MPS1, S27	ribosomal protein S27	0	0.443548	0
RPS3	OK/SW-cl.26, S3	ribosomal protein S3	0.108401	0.492832	0.0694444
RPS3A	FTE1, MFTL, S3A	ribosomal protein S3A	0.337159	0.654649	0.413603
FAU	FAU1, Fub1, Fubi, MNSFbeta, RPS30, S30, asr1	FAU, ubiquitin like and ribosomal protein S30 fusion	0.243902	0.322581	0
RPS4X	CCG2, DXS306, RPS4, S4, SCAR, SCR10	ribosomal protein S4, X-linked	0.373027	0.559772	0.284926
RPS5	S5	ribosomal protein S5	0.353659	0.451613	0
RPS6	RP11-513M16.6, S6	ribosomal protein S6	0.503049	1.27016	0.664062
RPS7	DBA8, S7	ribosomal protein S7	0.421286	0.821114	0.0568182
RPS8	RP11-269F19.3, S8	ribosomal protein S8	0.378049	0.645161	0.546875
RPS9	XXbac-BCX105G6.6, S9	ribosomal protein S9	0.243902	0.718475	0.667614
RPSA	37LRP, 67LR, ICAS, LAMBR, LAMR1, LBP, LBP/p40, LRP, LRP/LR, NEM/1CHD4, SA, lamR, p40	ribosomal protein SA	0	0.0460829	0.078125
LSU maturation proteins
BOP1	KIAA0124	block of proliferation 1	0.192555	0.0636672	0.271382
ABCF2	HUSSY-18, ABC28, EST133090, HUSSY18	ATP binding cassette subfamily F member 2	0.0139373	0.0921659	0
BRIX1	BRIX, BXDC2	BRX1, biogenesis of ribosomes	0.359079	0.250896	0.538194
CEBPZ	CBF, CBF2, HSP-CBF, NOC1	CCAAT/enhancer binding protein zeta	0.145403	0.0279156	0.285457
DDX18	MrDb	DEAD-box helicase 18	0.229555	0.147059	0.321691
DDX24		DEAD-box helicase 24	0.0636267	0.0420757	0.15625
DDX27	HSPC259, DRS1, Drs1p, PP3241, RHLP, dJ686N3.1	DEAD-box helicase 27	0.175837	0.0862716	0.34157
DDX31	PPP1R25	DEAD-box helicase 31	0	0.0134409	0.0130208
DDX51		DEAD-box helicase 51	0.0440379	0	0
DDX54	DP97	DEAD-box helicase 54	0.168656	0.109815	0.292553
DDX55	KIAA1595	DEAD-box helicase 55	0.0522648	0.0691244	0
DDX56	DDX21, DDX26, NOH61	DEAD-box helicase 56	0.145555	0.0988554	0.146169
DHX15	DBP1, DDX15, HRH2, PRP43, PRPF43, PrPp43p	DEAH-box helicase 15	0.0624628	0	0.0800305
DIS3	2810028N01Rik, EXOSC11, KIAA1008, RRP44, dis3p	DIS3 homolog, exosome endoribonuclease and 3'-5' exoribonuclease	0.0095648	0	0
EBNA1BP2	RP5-1034F7.2, EBP2, NOBP, P40	EBNA1 binding protein 2	0.289634	0.241935	0.595703
EIF6	RP4-614O4.1, CAB, EIF3A, ITGB4BP, b(2)gcn, eIF-6, p27(BBP), p27BBP	eukaryotic translation initiation factor 6	0.166297	0.190616	0.340909
EXOSC10	PM-Scl, PM/Scl-100, PMSCL, PMSCL2, RRP6, Rrp6p, p2, p3, p4	exosome component 10	0.0675087	0.0720046	0.0195312
EXOSC2	RP11-57C19.4, RRP4, Rrp4p, hRrp4p, p7	exosome component 2	0.146341	0.225806	0
EXOSC4	RRP41, RRP41A, Rrp41p, SKI6, Ski6p, hRrp41p, p12A	exosome component 4	0	0.107527	0
EXOSC5		exosome component 5	0.0443459	0	0
EXOSC6	EAP4, MTR3, Mtr3p, hMtr3p, p11	exosome component 6	0.0844278	0.0744417	0
EXOSC7	EAP1, RRP42, Rrp42p, hRrp42p, p8	exosome component 7	0.0573888	0.104364	0
EXOSC8	CIP3, EAP2, OIP2, PCH1C, RRP43, Rrp43p, bA421P11.3, p9	exosome component 8	0	0.0604839	0
EXOSC9		exosome component 9	0.0320924	0	0
FTSJ3	SB92, EPCS3, SPB1	FtsJ homolog 3	0.289634	0.229839	0.464844
GLTSCR2	PICT-1, PICT1	glioma tumor suppressor candidate region gene 2	0.182927	0.215054	0.329861
GNL2	HUMAUANTIG, NGP1, Ngp-1	G protein nucleolar 2	0.109114	0.110357	0.213816
GNL3	C77032, E2IG3, NNP47, NS	G protein nucleolar 3	0.300188	0.297767	0.450721
GRWD1	CDW4, GRWD, RRB1, WDR28	glutamate rich WD repeat containing 1	0.0365854	0.0322581	0.03125
GNL3L	RP11-353K22.1	G protein nucleolar 3 like	0.0174216	0.0921659	0
GTPBP4	RP11-38M7.5, CRFG, NGB, NOG1	GTP binding protein 4	0.409892	0.336022	0.533854
HNRNPR	HNRPR, hnRNP-R	heterogeneous nuclear ribonucleoprotein R	0	0.0635386	0
KIAA0020	RP11-526D20.2, HA-8, HLA-HA8, PEN, PUF6, XTP5, hPUF-A	pumillio homolog 3	0.133038	0.0342131	0.123106
LAS1L	RP3-475B7.2, Las1-like, dJ475B7.2	LAS1 like, ribosome biogenesis factor	0.054878	0.112903	0.0976562
MAK16	MAK16L, RBM13	MAK16 homolog	0.162602	0.0860215	0.3125
MDN1	RP1-122O8.1	midasin AAA ATPase 1	0.0108312	0.0206919	0.00976562
MRTO4	C1orf33, MRT4, dJ657E11.4	MRT4 homolog, ribosome maturation factor	0.235772	0.16129	0.34375
NIFK	MKI67IP, Nopp34	nucleolar protein interacting with the FHA domain of MKI67	0.325203	0.16129	0.5
NIP7	CGI-37, HSPC031, KD93	NIP7, nucleolar pre-rRNA processing protein	0.203252	0.250896	0.329861
NLE1	HUSSY-07, Nle	notchless homolog 1	0.0954401	0.0771388	0.190217
NOC2L	NET15, NET7, NIR, PPP1R112	NOC2 like nucleolar associated transcriptional repressor	0.162602	0.0782014	0.265152
NOC3L	AD24, C10orf117, FAD24	NOC3 like DNA replication regulator	0.201055	0.126417	0.320946
NOL12	Nop25, dJ37E16.7	Nucleolar protein 12	1	1	1
NOL9	Grc3, NET6	nucleolar protein 9	0.031617	0.131422	0.115741
NOP16	CGI-117, HSPC111, HSPC185	NOP16 nucleolar protein	0.292683	0.306452	0.4375
NOP2	NOL1, NOP120, NSUN1, p120	NOP2 nucleolar protein	0.231395	0.148883	0.296474
NOP9	C14orf21	NOP9 nucleolar protein	0.0419207	0.0252016	0
NSA2	HUSSY-29, CDK105, HCL-G1, HCLG1, HUSSY29, TINP1	NSA2, ribosome biogenesis homolog	0.168856	0.136476	0.408654
NVL		nuclear VCP-like	0.0674624	0.0995196	0.229388
PA2G4	EBP1, HG4-1, p38-2G4	proliferation-associated 2G4	0.0530223	0.0490884	0.0679348
PAK1IP1	RP11-421M1.5, MAK11, PIP1, WDR84, bA421M1.5, hPIP1	PAK1 interacting protein 1	0.12837	0.0933786	0.0986842
PAPD5	TRF4-2	poly(A) RNA polymerase D5, non-canonical	0	0	0.0646552
PELP1	MNAR, P160	proline-, glutamic acid- and leucine-rich protein 1	0.0609756	0.149194	0.0976562
PES1	PES	pescadillo ribosomal biogenesis factor 1	0.302911	0.140479	0.418347
PPAN-P2RY11		PPAN-P2RY11 readthrough	0.070122	0.0685484	0.195312
PWP1	IEF-SSP-9502	PWP1 homolog, endonuclein	0	0	0.0892857
RBM28		RNA binding motif protein 28	0.108401	0.062724	0.16059
RBM34	RP11-739C15.1	RNA binding motif protein 34	0.050813	0.0268817	0.208333
RPF1	RP11-118B23.1, BXDC5	ribosome production factor 1 homolog	0.160061	0	0.429688
RPF2	RP11-397G5.1, BXDC1, bA397G5.4	ribosome production factor 2 homolog	0.260163	0.193548	0.375
RPP30	TSG15	ribonuclease P/MRP subunit p30	0.0304878	0	0
RRP1	D21S2056E, NNP-1, NOP52A, RRP1	ribosomal RNA processing 1	1.40244	0.483871	2.96875
RRP1B	KIAA0179, NNP1L, Nnp1, PPP1R136, RRP1	ribosomal RNA processing 1B	0.148319	0.0305144	0.0929054
RRP12	RP11-452K12.13-007, KIAA0690	ribosomal RNA processing 12 homolog	0.0849963	0.114858	0.0284091
RRP15	CGI-115, KIAA0507	ribosomal RNA processing 15 homolog	0.156794	0.103687	0.345982
RRP7A	CTA-126B4.5, BK126B4.3, CGI-96	ribosomal RNA processing 7 homolog A	0.101626	0	0
RRS1	KIAA0112, RRR	ribosome biogenesis regulator homolog	0.406504	0.276498	0.595238
RSL1D1	L12, CSIG, PBK1, UTP30	ribosomal L1 domain containing 1	0.652174	0.308555	0.686141
RSL24D1	My024, C15orf15, HRP-L30-iso, L30, RLP24, RPL24, RPL24L, TVAS3	ribosomal L24 domain containing 1	0.335366	0	0.585938
SDAD1	NUC130	SDA1 domain containing 1	0.0121951	0.0524194	0
SENP3	SMT3IP1, SSP3, Ulp1	SUMO1/sentrin/SMT3 specific peptidase 3	0.0562852	0.130273	0.0661058
SKIV2L2	Dob1, KIAA0052, Mtr4, fSAP118	Ski2 like RNA helicase 2	0.0696864	0.0835253	0.0167411
SPATA5	AFG2, SPAF	spermatogenesis associated 5	0.0515947	0.0279156	0.0390625
SPATA5L1		spermatogenesis associated 5 like 1	0.0535396	0.0393391	0.0304878
SRSF1	OK/SW-cl.3, ASF, SF2, SF2p33, SFRS1, SRp30a	serine and arginine rich splicing factor 1	0.159475	0	0
SURF6	RRP14	surfeit 6	0.0844278	0.0992556	0.300481
TEX10	RP11-208F1.2, Ipi1, bA208F1.2	testis expressed 10	0.0722674	0.185185	0.0925926
URB1	C21orf108, NPA1	URB1 ribosome biogenesis 1 homolog (S. cerevisiae)	0.0169932	0.0198308	0
WDR12	YTM1	WD repeat domain 12	0.185578	0.105189	0.366848
WDR18	Ipi3, R32184_1	WD repeat domain 18	0.116408	0.16129	0.0852273
WDR74	NSA1	WD repeat domain 74	0.0962773	0	0.189145
XPO1	CRM1, emb, exp1	exportin 1	0	0.0172811	0
XRN2	RP11-227D2.1	5'-3' exoribonuclease 2	0.0257974	0	0.015024
SSU maturation proteins
BYSL	RP5-973N23.2, BYSTIN	bystin like	0.0587173	0.101553	0.0231481
DIMT1	HUSSY-05, DIM1L, HSA9761, HUSSY5, DIMT1	DIM1 dimethyladenosine transferase 1 homolog	0	0.0564516	0
LTV1	C6orf93, dJ468K18.4	LTV1 ribosome biogenesis factor	0	0.100806	0
NOB1	MSTP158, ART-4, MST158P, PSMD8BP1, NOB1	NIN1/PSMD8 binding protein 1 homolog	0	0.0403226	0
PNO1	KHRBP1, RRP20	partner of NOB1 homolog	0.159475	0.16129	0
RRP12	RP11-452K12.13-007, KIAA0690	ribosomal RNA processing 12 homolog	0.0849963	0.114858	0.0284091
RRP36	C6orf153, dJ20C7.4	ribosomal RNA processing 36	0.035868	0	0
RRP9	RNU3IP2, U3-55K	ribosomal RNA processing 9, small subunit (SSU) processome component, homolog (yeast)	0.0281426	0	0
TSR1	KIAA1401	TSR1, ribosome maturation factor	0.0609756	0.129928	0
90S proteins
AATF	HSPC277, BFR2, CHE-1, CHE1, DED	apoptosis antagonizing transcription factor	0.127253	0.119215	0.129076
BMS1	AL022344.1, ACCL, BMS1	BMS1, ribosome biogenesis factor	0.144535	0.0866189	0.104167
BYSL	RP5-973N23.2, BYSTIN	bystin like	0.0587173	0.101553	0.0231481
CIRH1A	CIRHIN, NAIC, TEX292, UTP4	UTP4, Small Subunit Processome Component	0.105014	0.0268817	0.0651042
DCAF13	HSPC064, GM83, WDSOF1	DDB1 and CUL4 associated factor 13	0.0762195	0	0.0651042
DDX10	HRH-J8	DEAD-box helicase 10	0.0609756	0.0596073	0.064538
DDX47	E4-DBP, HQ0256, MSTP162, RRP3	DEAD-box helicase 47	0.144124	0.0733138	0.0355114
DDX49	R27090_2	DEAD-box helicase 49	0.0469043	0	0
DDX52	HUSSY-19, HUSSY19, ROK1	probable ATP-dependent RNA helicase DDX52	0.135017	0.0576037	0
DHX33	DDX33	DEAH-box helicase 33	0.029036	0	0
DHX37	DDX37	DEAH-box helicase 37	0.0206697	0.0191361	0
DIMT1	HUSSY-05, DIM1L, HSA9761, HUSSY5, DIMT1	DIM1 dimethyladenosine transferase 1 homolog	0	0.0564516	0
DKC1	CBF5, DKC, DKCX, NAP57, NOLA4, XAP101	dyskerin pseudouridine synthase 1	0.0740418	0	0.0558036
DNTTIP2	ERBP, FCF2, HSU15552, LPTS-RP2, TdIF2	deoxynucleotidyltransferase terminal interacting protein 2	0.0627178	0	0.0625
EMG1	C2F, Grcc2f, NEP1	EMG1, N1-specific pseudouridine methyltransferase	0.11324	0	0.0446429
FBL	FIB, FLRN, RNU3IP1	fibrillarin	0.282413	0.152801	0.148026
HEATR1	RP11-385F5.3, BAP28, UTP10	HEAT repeat containing 1	0.120935	0.0174731	0.0820312
IMP3	BRMS2, C15orf12, MRPS4	IMP3, U3 small nucleolar ribonucleoprotein	0.0997783	0.058651	0.113636
IMP4	BXDC4	IMP4 homolog, U3 small nucleolar ribonucleoprotein	0.130662	0	0.100446
ISG20L2	HSD38	interferon-stimulated 20 kDa exonuclease-like 2	0.0406504	0	0
REXO4	RP11-244N20.5, REX4, XPMC2, XPMC2H	REX4 homolog, 3'-5' exonuclease	0.0797373	0	0
KRI1		KRI1 homolog	0.0225836	0.0716846	0
KRR1	HRB2, RIP-1	KRR1, small subunit processome component homolog	0.0880759	0.107527	0
MPHOSPH10	CT90, MPP10, MPP10P, PPP1R106	M-phase phosphoprotein 10	0.135017	0.0288018	0.0390625
NAT10	ALP, NET43	N-acetyltransferase 10	0.15709	0.136687	0.100636
NCL	C23	nucleolin	0.141621	0	0
NGDN	C14orf120, CANu1, LCP5, NGD, lpd-2	neuroguidin	0.0609756	0	0.078125
NOC4L	NET49, NOC4, UTP19	nucleolar complex associated 4 homolog	0.117746	0.0945495	0.0646552
NOL10	PQBP5	nucleolar protein 10	0.0627178	0.0645161	0.116071
NOL11	L14	nucleolar protein 11	0.0992626	0	0.065407
NOL6	NRAP, UTP22, bA311H10.1	nucleolar protein 6	0.0914634	0.0302419	0.0292969
NOLC1	NOPP130, NOPP140, NS5ATP13, P130	nucleolar and coiled-body phosphoprotein 1	0.0849963	0	0
NOM1	C7orf3, PPP1R113, SGD1	nucleolar protein with MIF4G domain 1	0	0.0420757	0.0203804
NOP14	RES4-25, C4orf9, NOL14, RES425, UTP2	NOP14 nucleolar protein	0.0850822	0.0337584	0.0145349
NOP56	RP4-686C3.1, NOL5A, SCA36	NOP56 ribonucleoprotein	0.175305	0.0352823	0.141602
NOP58	HSPC120, NOP5, NOP5/NOP58	NOP58 ribonucleoprotein	0.204878	0.116129	0.15
PDCD11	ALG-4, ALG4, NFBP, RRP5	programmed cell death 11	0.158039	0.0493746	0.0605867
PNO1	KHRBP1, RRP20	partner of NOB1 homolog	0.159475	0.16129	0
PWP2	EHOC-17H, UTP1, PWP2	PWP2 periodic tryptophan protein homolog (yeast)	0.0804359	0.0652025	0.056516
RBM19	KIAA0682	RNA binding motif protein 19	0.011956	0	0
RCL1	RP11-125K10.1, RNAC, RPCL1	RNA terminal phosphate cyclase like 1	0.0929152	0.0537634	0.0595238
RRP12	RP11-452K12.13-007, KIAA0690	ribosomal RNA processing 12 homolog	0.0849963	0.114858	0.0284091
SNU13	15.5K, FA-1, FA1, NHP2L1, NHPX, OTK27, SNRNP15-5, SPAG12, SSFA1	SNU13 homolog, small nuclear ribonucleoprotein (U4/U6.U5)	0.156794	0	0
TBL3	SAZD, UTP13	transducin beta like 3	0.121951	0.0739247	0.0911458
URB2	RP11-108F13.1, KIAA0133, NET10, NPA2	URB2 ribosome biogenesis 2 homolog (S. cerevisiae)	0.0167683	0.0100806	0
UTP11	CGI-94, CGI94, UTP11L	UTP11, small subunit processome component homolog (S. cerevisiae)	0.0813008	0	0.0651042
UTP14A	RP4-537K23.16-001, NYCO16, SDCCAG16, dJ537K23.3	UTP14A small subunit processome component	0.130874	0.0236035	0.0457317
UTP15	NET21	UTP15, small subunit processome component	0.125762	0.0252016	0.112305
UTP18	CDABP0061, CGI-48, WDR50	UTP18, small subunit processome component	0.130662	0.0518433	0.0725446
UTP20	DRIM	UTP20, small subunit processome component	0.0476111	0.0077331	0.00642123
UTP3	CRL1, CRLZ1, SAS10	UTP3, small subunit processome component homolog (S. cerevisiae)	0.160061	0.0403226	0
UTP6	C17orf40, HCA66	UTP6, small subunit processome component	0.0762195	0	0.046875
WDR3	RP4-776P7.1, DIP2, UTP12	WD repeat domain 3	0.129418	0.0724161	0.0892857
WDR36	GLC1G, TA-WDRP, TAWDRP, UTP21	WD repeat domain 36	0.151817	0.105332	0.0765306
WDR43	NET12, UTP5	WD repeat domain 43	0.114778	0.0189753	0.0643382
WDR46	DADB-159G18.3, BING4, C6orf11, FP221, UTP7	WD repeat domain 46	0.114329	0	0.0683594
WDR75	NET16, UTP17	WD repeat domain 75	0.0838415	0.0268817	0.0813802
Other Ribosome Biogenesis factors
LYAR	PNAS-5, ZC2HC2, ZLYAR	Ly1 antibody reactive	0.0449294	0.0933786	0
MYBBP1A	P160, PAP2	MYB binding protein 1a	0.243902	0.123208	0.0824653
MKI67	RP11-380J17.2, KIA, MIB-, MIB-1, PPP1R105	marker of proliferation Ki-67	0.0304878	0.00468867	0
NPM1	B23, NPM	nucleophosmin	0.558943	0.295699	0.195312
NSUN5	NOL1, NOL1R, NSUN5A, WBSCR20, WBSCR20A, p120, p120(NOL1)	NOP2/Sun RNA methyltransferase family member 5	0.0234522	0	0
TCOF1	MFD1, TCS, TCS1, treacle	treacle ribosome biogenesis factor 1	0.0600077	0	0
WDR55		WD repeat domain 55	0	0	0.0446429
mRNA maturation and protein regulation
ABCF1	DADB-129D20.7, ABC27, ABC50	ATP binding cassette subfamily F member 1	0.0194013	0.0366569	0
ACIN1	ACINUS, ACN, fSAP152	apoptotic chromatin condensation inducer 1	0.00774293	0	0
ADAR	RP11-61L14.51, AGS6, DRADA, DSH, DSRAD, G1P1, IFI-4, IFI4, K88DSRBP, P136, ADAR	adenosine deaminase, RNA specific	0.0400697	0.062212	0.0245536
ALYREF	ALY, ALY/REF, BEF, REF, THOC4	Aly/REF export factor	0.050813	0	0
ASCC3	RP1-121G13.4, ASC1p200, HELIC1, RNAH	activating signal cointegrator 1 complex subunit 3	0.0209604	0.0214214	0
ATXN2	ASL13, ATX2, SCA2, TNRC13	ataxin 2	0	0.0175316	0
BTF3	OK/SW-cl.8, BETA-NACa, BTF3b, NACB, BTF3	basic transcription factor 3	0	0.16129	0
C14orf166	CGI-99, CGI99, CLE, CLE7, LCRP369, RLLM1	chromosome 14 open reading frame 166	0.107604	0.426945	0.147059
C1QBP	GC1QBP, HABP1, SF2p32, gC1Q-R, gC1qR, p32	complement C1q binding protein	0.148084	0.0806452	0.178571
C7orf50	YCR016W	chromosome 7 open reading frame 50	0.0677507	0	0
C9orf114		putative methyltransferase C9orf114	0.0304878	0	0
CANX	CNX, IP90, P90	calnexin	0.0314713	0.0416233	0
CAPRIN1	GPIAP1, GPIP137, GRIP137, M11S1, RNG105, p137GPI	cell cycle associated protein 1	0.0891182	0	0
CCDC124		coiled-coil domain containing 124	0	0.0496278	0
CCT2	99D8.1, CCT-beta, CCTB, HEL-S-100n, PRO1633, TCP-1-beta	chaperonin containing TCP1 subunit 2	0.0772358	0.102151	0.0989583
CCT3		chaperonin containing TCP1 subunit 3	0.0369549	0	0
CCT4	CCT-DELTA, Cctd, SRB	chaperonin containing TCP1 subunit 4	0.0342988	0.0604839	0.078125
CCT5	CCT-epsilon, CCTE, HEL-S-69, TCP-1-epsilon	chaperonin containing TCP1 subunit 5	0.053802	0.0901328	0.0597426
CCT6A	CCT-zeta, CCT-zeta-1, CCT6, Cctz, HTR3, MoDP-2, TCP-1-zeta, TCP20, TCPZ, TTCP20	chaperonin containing TCP1 subunit 6A	0.0903342	0.0716846	0.0347222
CCT8	C21orf112, Cctq, D21S246, PRED71	chaperonin containing TCP1 subunit 8	0.0449294	0.0551783	0.0452303
CDC5L	RP1-319D22.1, CDC5, CDC5-LIKE, CEF1, PCDC5RP, dJ319D22.1	cell division cycle 5 like	0.0494397	0	0.0506757
CTNNBL1	C20orf33, NAP, P14L, PP8304, dJ633O20.1	catenin beta like 1	0	0.0387097	0
DDX1	DBP-RB, UKVH5d	DEAD/H-box helicase 1	0.0842044	0.326421	0.0855655
DDX17	RP3-434P1.1, P72, RH70	DEAD-box helicase 17	0.108401	0.15681	0.0954861
DDX5	G17P1, HLR1, HUMP68, p68	DEAD-box helicase 5	0.118256	0.254154	0.0473485
DDX21	GUA, GURDB, RH-II/GU, RH-II/GuA	DEAD-box helicase 21	0.293264	0.322581	0.249256
DDX23	PRPF28, SNRNP100, U5-100K, U5-100KD, prp28	DEAD-box helicase 23	0.0569106	0.0322581	0
DDX39B	DAAP-97M17.4, BAT1, D6S81E, UAP56	DEAD-box helicase 39B	0.0304878	0.0403226	0.0390625
DDX3X	CAP-Rf, DBX, DDX14, DDX3, HLP2	DEAD-box helicase 3, X-linked	0.0654372	0.0629426	0.0571646
DDX50	GU2, GUB, RH-II/GuB, mcdrh	DEAD-box helicase 50	0.0856955	0.16129	0.105574
DHX9	DDX9, LKP, NDH2, NDHII, RHA	DEAH-box helicase 9	0.164993	0.189753	0.29182
DIS3	2810028N01Rik, EXOSC11, KIAA1008, RRP44, dis3p	DIS3 homolog, exosome endoribonuclease and 3'-5' exoribonuclease	0.0095648	0	0
EEF1B2	EEF1B, EEF1B1, EF1B	eukaryotic translation elongation factor 1 beta 2	0.050813	0	0
EEF1G	PRO1608, EF1G, GIG35	eukaryotic translation elongation factor 1 gamma	0.032833	0.0496278	0.0360577
EEF2	EEF-2, EF-2, EF2, SCA26	eukaryotic translation elongation factor 2	0.0945744	0.204082	0.121173
EFTUD2	MFDGA, MFDM, SNRNP116, Snrp116, Snu114, U5-116KD	elongation factor Tu GTP binding domain containing 2	0.113082	0.0938416	0.0255682
EIF2AK2	RP11-545E17.7, CENP-32, HSPC109	eukaryotic translation initiation factor 2 alpha kinase 2	0.0762195	0.0268817	0
EIF2S1	EIF-2, EIF-2A, EIF-2alpha, EIF2, EIF2A	eukaryotic translation initiation factor 2 subunit alpha	0.0388027	0	0
EIF2S2	EIF2, EIF2B, EIF2beta, PPP1R67, eIF-2-beta	eukaryotic translation initiation factor 2 subunit beta	0.0232288	0	0
EIF2S3	EIF2, EIF2G, EIF2gamma, eIF-2gA	eukaryotic translation initiation factor 2 subunit gamma	0.04772	0.0701262	0
EIF3A	EIF3, EIF3S10, P167, TIF32, eIF3-p170, eIF3-theta, p180, p185	eukaryotic translation initiation factor 3 subunit A	0.0501169	0.110473	0.0128425
EIF3B	EIF3-ETA, EIF3-P110, EIF3-P116, EIF3S9, PRT1	eukaryotic translation initiation factor 3 subunit B	0.0513479	0.0806452	0.0328947
EIF3CL	EIF3CL, EIF3S8, eIF3-p110	eukaryotic translation initiation factor 3 subunit C-like	0.0325203	0.0358423	0.03125
EIF3D	RP5-1119A7.12-003, EIF3S7, eIF3-p66, eIF3-zeta	eukaryotic translation initiation factor 3 subunit D	0.0292683	0.0580645	0
EIF3E	EIF3-P48, EIF3S6, INT6, eIF3-p46	eukaryotic translation initiation factor 3 subunit E	0.0162602	0.0645161	0
EIF3F	EIF3S5, eIF3-p47	eukaryotic translation initiation factor 3 subunit F	0.0573888	0.0948767	0
EIF3H	EIF3S3, eIF3-gamma, eIF3-p40	eukaryotic translation initiation factor 3 subunit H	0	0.0806452	0
EIF3I	RP4-675E8.1, EIF3S2, PRO2242, TRIP-1, TRIP1, eIF3-beta, eIF3-p36	eukaryotic translation initiation factor 3 subunit I	0.0243902	0.0725806	0
EIF3K	ARG134, EIF3-p28, EIF3S12, HSPC029, M9, MSTP001, PLAC-24, PLAC24, PRO1474, PTD001	eukaryotic translation initiation factor 3 subunit K	0	0.0537634	0
EIF3M	B5, GA17, PCID1, TANGO7, hfl-B5	eukaryotic translation initiation factor 3 subunit M	0.0232288	0.0460829	0
EIF3L	AL022311.1, EIF3EIP, EIF3S11, EIF3S6IP, HSPC021, HSPC025, MSTP005	eukaryotic translation initiation factor 3 subunit L	0.0322812	0.0711575	0
EIF4A3	DDX48, MUK34, NMP265, NUK34, RCPS, eIF4AIII	eukaryotic translation initiation factor 4A3	0.0341463	0.0709677	0.03125
EIF4A1	DDX2A, EIF-4A, EIF4A, eIF-4A-I, eIF4A-I	eukaryotic translation initiation factor 4A1	0.0711382	0.134409	0.0976562
EIF4G1	EIF-4G1, EIF4F, EIF4G, EIF4GI, P220, PARK18	eukaryotic translation initiation factor 4 gamma 1	0.0291996	0.0386188	0
EIF5B	IF2	eukaryotic translation initiation factor 5B	0.012837	0.0113186	0
ELAVL1	ELAV1, HUR, Hua, MelG	ELAV like RNA binding protein 1	0.0533537	0	0.0390625
ESF1	ABTAP, C20orf6, HDCMC28P, bA526K24.1	ESF1 nucleolar pre-rRNA processing protein homolog	0.0267698	0	0
EWSR1	EWS, EWS-FLI1, bK984G1.4	EWS RNA binding protein 1	0.0304878	0	0
EXOSC10	PM-Scl, PM/Scl-100, PMSCL, PMSCL2, RRP6, Rrp6p, p2, p3, p4	exosome component 10	0.0675087	0.0720046	0.0195312
EXOSC2	RP11-57C19.4, RRP4, Rrp4p, hRrp4p, p7	exosome component 2	0.146341	0.225806	0
EXOSC4	RRP41, RRP41A, Rrp41p, SKI6, Ski6p, hRrp41p, p12A	exosome component 4	0	0.107527	0
EXOSC5		exosome component 5	0.0443459	0	0
EXOSC6	EAP4, MTR3, Mtr3p, hMtr3p, p11	exosome component 6	0.0844278	0.0744417	0
EXOSC7	EAP1, RRP42, Rrp42p, hRrp42p, p8	exosome component 7	0.0573888	0.104364	0
EXOSC8		exosome component 8		0.0604839
EXOSC9		exosome component 9	0.0320924	0	0
FAM98A		family with sequence similarity 98 member A	0.0265111	0.147265	0
FAM98B		family with sequence similarity 98 member B	0	0.150538	0
FMR1	FMRP, FRAXA, POF, POF1	fragile X mental retardation 1	0.0542005	0.0806452	0
FUS	ALS6, ETM4, FUS1, HNRNPP2, POMP75, TLS	FUS RNA binding protein	0.050813	0	0
FXR1	FXR1P	FMR1 autosomal homolog 1	0.0295639	0.0733138	0
FXR2	FMR1L2P, FXR2	FMR1 autosomal homolog 2	0.0203252	0.0448029	0
GCN1L1	GCN1, GCN1L, PRIC295	eIF-2-alpha kinase activator GCN1	0.0230518	0.0285208	0.00571646
HDLBP	HBP, PRO2900, VGL	high density lipoprotein binding protein	0.014782	0	0
HERC5	CEB1, CEBP1	HECT and RLD domain containing E3 ubiquitin protein ligase 5	0	0.0381232	0.0113636
HNRNPA1	ALS19, ALS20, HNRPA1, HNRPA1L3, IBMPFD3, hnRNP A1, hnRNP-A1	heterogeneous nuclear ribonucleoprotein A1	0.136298	0	0
HNRNPA2B1	HNRNPA2, HNRNPB1, HNRPA2, HNRPA2B1, HNRPB1, IBMPFD2, RNPA2, SNRPB1	heterogeneous nuclear ribonucleoprotein A2/B1	0.0770218	0.0339559	0
HNRNPA3	2610510D13Rik, D10S102, FBRNP, HNRPA3	heterogeneous nuclear ribonucleoprotein A3	0.0542005	0	0
HNRNPC	C1, C2, HNRNP, HNRPC, SNRPC	heterogeneous nuclear ribonucleoprotein C (C1/C2)	0.0286944	0.237192	0.211397
HNRNPD	AUF1, AUF1A, HNRPD, P37, hnRNPD0	heterogeneous nuclear ribonucleoprotein D	0.0325203	0	0
HNRNPF	HNRPF, OK/SW-cl.23, mcs94-1	heterogeneous nuclear ribonucleoprotein F	0	0	0.0520833
HNRNPH1	HNRPH, HNRPH1, hnRNPH	heterogeneous nuclear ribonucleoprotein H1 (H)	0.0636267	0	0.0407609
HNRNPH2	FTP3, HNRPH', HNRPH2, hnRNPH'	heterogeneous nuclear ribonucleoprotein H2 (H')	0.029036	0	0
HNRNPK	RP11-575L7.1, CSBP, HNRPK, TUNP	heterogeneous nuclear ribonucleoprotein K	0.0682927	0.0387097	0
HNRNPL	P/OKcl.14, HNRPL, hnRNP-L	heterogeneous nuclear ribonucleoprotein L	0.031617	0.0597372	0.0405093
HNRNPM	CEAR4, HNRPM, HNRPM4, HTGR1, NAGR1, hnRNP M, HNRNPM	heterogeneous nuclear ribonucleoprotein M	0.260163	0.100358	0.138889
HNRNPR	HNRPR, hnRNP-R	heterogeneous nuclear ribonucleoprotein R	0	0.0635386	0
HNRNPU	RP11-11N7.3, HNRPU, SAF-A, U21.1, hnRNP U	heterogeneous nuclear ribonucleoprotein U	0.0826121	0.0988554	0.0907258
HSPA5	BIP, GRP78, HEL-S-89n, MIF2	heat shock protein family A (Hsp70) member 5	0.0184775	0.0488759	0.0426136
HSPA8	HEL-33, HEL-S-72p, HSC54, HSC70, HSC71, HSP71, HSP73, HSPA10, LAP-1, LAP1, NIP71	heat shock protein family A (Hsp70) member 8	0.0627178	0.0645161	0.0892857
IGF2BP1	CRD-BP, CRDBP, IMP-1, IMP1, VICKZ1, ZBP1	insulin like growth factor 2 mRNA binding protein 1	0.0668765	0.0728408	0.0302419
IGF2BP3	CT98, IMP-3, IMP3, KOC, KOC1, VICKZ3	insulin like growth factor 2 mRNA binding protein 3	0.0236035	0.0260146	0
ILF2	RP11-354A16.1, NF45, PRO3063	interleukin enhancer binding factor 2	0.173299	0.127334	0.0575658
ILF3	CBTF, DRBF, DRBP76, MMP4, MPHOSPH4, MPP4, NF-AT-90, NF110, NF110b, NF90, NF90a, NF90b, NFAR, NFAR-1, NFAR2, TCP110, TCP80	interleukin enhancer binding factor 3	0.0667828	0.0729647	0.0855655
IPO4	Imp4	importin 4	0.0130662	0.0144009	0
IPO5	IMB3, KPNB3, Pse1, RANBP5, imp5	importin 5	0	0.0250278	0.0107759
KIAA0020	RP11-526D20.2, HA-8, HLA-HA8, PEN, PUF6, XTP5, hPUF-A	pumilio homolog 3	0.133038	0.0342131	0.123106
KHDRBS1	Sam68, p62, p68	KH RNA binding domain containing, signal transduction associated 1	0	0.0691244	0
KHSRP	FBP2, FUBP2, KSRP	KH-type splicing regulatory protein	0.0474255	0	0
KPNA2	IPOA1, QIP2, RCH1, SRP1-alpha, SRP1alpha	karyopherin subunit alpha 2	0.0406504	0.0403226	0.0260417
KPNB1	IMB1, IPO1, IPOB, Impnb, NTF97	karyopherin subunit beta 1	0.0425411	0.0862716	0.0508721
LARP1	LARP	La ribonucleoprotein domain family member 1	0.0177026	0.0884495	0
LARP4	PP13296	La ribonucleoprotein domain family member 4	0	0.0520291	0
LARP4B	KIAA0217, LARP5	La ribonucleoprotein domain family member 4B	0	0.0230415	0
LRRC47		leucine rich repeat containing 47	0.0236035	0.0364204	0
LRPPRC	CLONE-23970, GP130, LRP130, LSFC	leucine rich pentatricopeptide repeat containing	0.00804074	0	0
MATR3	ALS21, MPD2, VCPDM	matrin 3	0.0637472	0.0879765	0.145597
MOV10	RP11-426L16.2, fSAP113, gb110	Mov10 RISC complex RNA helicase	0	0.0146628	0.0255682
MRTO4	C1orf33, MRT4, dJ657E11.4	MRT4 homolog, ribosome maturation factor	0.235772	0.16129	0.34375
NAA15	Ga19, NARG1, NAT1P, NATH, TBDN, TBDN100	N(alpha)-acetyltransferase 15, NatA auxiliary subunit	0	0.0205279	0
NCL	C23	nucleolin	0.141621	0	0
NOL7	RP1-223E5.1, C6orf90, PQBP3, RARG-1, dJ223E5.2	nucleolar protein 7	0.176152	0	0.0868056
NONO	NMT55, NRB54, P54, P54NRB, PPP1R114	non-POU domain containing, octamer-binding	0.411585	0.577957	0
NSUN2	MISU, MRT5, SAKI, TRM4	NOP2/Sun RNA methyltransferase family member 2	0.0166297	0	0.0177557
NUFIP2	PIG1, 182-FIP, 82-FIP, FIP-82	NUFIP2, FMR1 interacting protein 2	0	0.16129	0
NXF1	MEX67, TAP	nuclear RNA export factor 1	0.0266768	0	0
PABPC1	PAB1, PABP, PABP1, PABPC2, PABPL1	poly(A) binding protein cytoplasmic 1	0.0406504	0.219941	0
PABPC4	APP-1, APP1, PABP4, iPABP	poly(A) binding protein cytoplasmic 4	0.0258684	0.107527	0
PAPD5	TRF4-2	poly(A) RNA polymerase D5, non-canonical	0	0	0.0646552
PCBP1	HEL-S-85, HNRPE1, HNRPX, hnRNP-E1, hnRNP-X	poly(rC) binding protein 1	0.0406504	0	0
PCBP2	HNRNPE2, HNRPE2, hnRNP-E2	poly(rC) binding protein 2	0.0406504	0	0
PCID2	F10	PCI domain containing 2	0.021777	0	0
PNN	DRS, DRSP, SDK3, memA	pinin, desmosome associated protein	0	0.0268817	0
POP1		POP1 homolog, ribonuclease P/MRP subunit	0.0231287	0	0
PPP1CC	PP-1G, PP1C, PPP1G	protein phosphatase 1 catalytic subunit gamma	0.0474255	0.062724	0
PPP2R1A	PP2A-Aalpha, PP2AAALPHA, PR65A	protein phosphatase 2 scaffold subunit Aalpha	0.0251076	0.0332068	0.0183824
PRPF19	NMP200, PRP19, PSO4, SNEV, UBOX4, hPSO4	pre-mRNA processing factor 19	0.105322	0.0439883	0.0852273
PRPF4	HPRP4, HPRP4P, PRP4, Prp4p, RP70, SNRNP60	pre-mRNA processing factor 4	0	0.0268817	0
PRPF4B	PR4H, PRP4, PRP4H, PRP4K, dJ1013A10.1	pre-mRNA processing factor 4B	0.0267698	0	0
PRPF6	ANT-1, ANT1, C20orf14, Prp6, RP60, SNRNP102, TOM, U5-102K, hPrp6	pre-mRNA processing factor 6	0.0534874	0.0452745	0
PRPF8	HPRP8, PRP8, PRPC8, RP13, SNRNP220	pre-mRNA processing factor 8	0.0605305	0.0835884	0.0102646
PRPF40A	FBP-11, FBP11, FLAF1, FNBP3, HIP-10, HIP10, HYPA, NY-REN-6, Prp40	pre-mRNA processing factor 40 homolog A	0	0.0165426	0
PSMA6	IOTA, PROS27, p27K	proteasome subunit alpha 6	0.0348432	0.0691244	0
PSMC5	PSM	proteasome 26S subunit, ATPase 5	0.0304878	0.0604839	0
PSMD2	P97, RPN1, S2, TRAP2	proteasome 26S subunit, non-ATPase 2	0	0.0248139	0.0120192
PSMD3	P58, RPN3, S3, TSTA2	proteasome 26S subunit, non-ATPase 3	0	0.0332068	0
PSPC1	RP11-523H24.2, PSP1	paraspeckle component 1	0.0844278	0.0310174	0
PTBP1	HNRNP-I, HNRNPI, HNRPI, PTB, PTB-1, PTB-T, PTB2, PTB3, PTB4, pPTB	polypyrimidine tract binding protein 1	0.0742312	0	0
RALY	RP1-64K7.1, HNRPCL2, P542	RALY heterogeneous nuclear ribonucleoprotein	0	0.125448	0.0954861
RBM14	COAA, PSP2, SIP, SYTIP1, TMEM137	RNA binding motif protein 14	0.140713	0.0620347	0
RBMX	RP11-1114A5.1, HNRNPG, HNRPGP1, RBMXRT, RNMX, hnRNP-G, RBMX	RNA binding motif protein, X-linked	0.0609756	0.329912	0
RTCB	HSPC117, C22orf28, DJ149A16.6, FAAP	RNA 2',3'-cyclic phosphate and 5'-OH ligase	0.0722674	0.322581	0.115741
SAP18	2HOR0202, SAP18P	Sin3A associated protein 18	0.050813	0.0806452	0
SART1	Ara1, HOMS1259, SNRNP110, Snu66, SART1	squamous cell carcinoma antigen recognized by T-cells 1	0.0152439	0.0443548	0
SERBP1	CGI-55, CHD3IP, HABP4L, PAI-RBP1, PAIRBP1	SERPINE1 mRNA binding protein 1	0.18583	0.230415	0
SF3B1	Hsh155, MDS, PRP10, PRPF10, SAP155, SF3b155	splicing factor 3b subunit 1	0.0206379	0	0.0144231
SF3B2	Cus1, SAP145, SF3B145, SF3b1, SF3b150	splicing factor 3b subunit 2	0.0304878	0	0
SF3B3	RSE1, SAP130, SF3b130, STAF130	splicing factor 3b subunit 3	0.0118017	0	0
SFPQ	POMP100, PPP1R140, PSF	splicing factor proline and glutamine rich	0.353659	0.473118	0
SKIV2L	170A, DDX13, HLP, SKI2, SKI2W, SKIV2, SKIV2L1, THES2	Ski2 like RNA helicase	0	0.00962927	0
SMN2	BCD541, C-BCD541, GEMIN1, SMNC, TDRD16B	survival of motor neuron 2, centromeric	0.0554324	0	0.0568182
SMU1	BWD, SMU-1, fSAP57	DNA replication regulator and spliceosomal factor	0.0325203	0	0
SND1	TDRD11, p100	staphylococcal nuclease and tudor domain containing 1	0.0177384	0.0909091	0.0170455
SNRNP200	ASCC3L1, BRR2, HELIC2, RP33, U5-200KD	small nuclear ribonucleoprotein U5 subunit 200	0.0869652	0.0991539	0.0179303
SNRNP70	RNPU1Z, RPU1, SNRP70, Snp1, U1-70K, U170K, U1AP, U1RNP	small nuclear ribonucleoprotein U1 subunit 70	0	0	0.0575658
SNRPA1	Lea1	small nuclear ribonucleoprotein polypeptide A'	0	0.107527	0
SNRPB2	Msl1, U2B''	small nuclear ribonucleoprotein polypeptide B2	0.0665188	0.0733138	0
SNW1	Bx42, NCOA-62, PRPF45, Prp45, SKIIP, SKIP	SNW domain containing 1	0.0225836	0	0
SON	HSPC310, BASS1, C21orf50, DBP-5, NREBP3, SON	protein SON	0.0108058	0	0.0217563
SRP14	ALURBP	signal recognition particle 14	0.203252	0	0
SRP68		signal recognition particle 68	0.0156348	0.148883	0
SRP72	BMFF, BMFS1, HEL103	signal recognition particle 72	0.0203252	0.16129	0
SRP9	ALURBP	signal recognition particle 9	0.0696864	0.0921659	0
SRPK1	RP3-422H11.1, SFRSK1	SRSF protein kinase 1	0.043273	0.0728408	0
SRRM1	160-KD, POP101, SRM160	serine and arginine repetitive matrix 1	0	0	0.0228659
SRPR	SRPRA	SRPR protein	0.0169377	0.031362	0
SRSF1	OK/SW-cl.3, ASF, SF2, SF2p33, SFRS1, SRp30a	serine and arginine rich splicing factor 1	0.159475	0	0
SRSF3	SFRS3, SRp20	serine and arginine rich splicing factor 3	0.182927	0	0
SRSF5	HRS, SFRS5, SRP40	serine and arginine rich splicing factor 5	0.10453	0	0
SRSF7	9G8, AAG3, SFRS7	serine and arginine rich splicing factor 7	0.134146	0	0
SRSF10		serine and arginine rich splicing factor 10	0	0.0733138	0
STAU1	RP3-470L14.2, PPP1R150, STAU	staufen double-stranded RNA binding protein 1	0.142276	0.102151	0.0677083
SYNCRIP	RP1-3J17.2, GRY-RBP, GRYRBP, HNRNPQ, HNRPQ1, NSAP1, PP68, hnRNP-Q	synaptotagmin binding cytoplasmic RNA interacting protein	0.0365854	0	0.0416667
TCP1	CCT-alpha, CCT1, CCTa, D6S230E, TCP-1-alpha	t-complex 1	0.0724085	0.0604839	0.0585938
THOC2	RP5-1189B24.5, CXorf3, THO2, dJ506G2.1, hTREX120	THO complex 2	0.0262427	0.0102082	0
THOC6	BBIS, WDR58, fSAP35	THO complex 6	0.0449294	0	0
TRA2B	Htra2-beta, PPP1R156, SFRS10, SRFS10, TRA2-BETA, TRAN2B	transformer 2 beta homolog (Drosophila)	0.0886918	0	0.0710227
UBA1	CTD-2522E6.1, A1S9, A1S9T, A1ST, AMCX1, CFAP124, GXP1, POC20, SMAX2A, UBE1, UBE1X, UBA1	ubiquitin like modifier activating enzyme 1	0.0210261	0.0583982	0.0565733
UBB	HEL-S-50	ubiquitin B	0.0325203	0	0
UCHL1	HEL-117, HEL-S-53, NDGOA, PARK5, PGP 9.5, PGP9.5, PGP95, Uch-L1	ubiquitin C-terminal hydrolase L1	0	0.058651	0.0710227
USP10	UBPO	ubiquitin specific peptidase 10	0.00609756	0.0262097	0
USP36	scny	ubiquitin carboxyl-terminal hydrolase 36	0.0110865	0	0
USP39	CGI-21, 65K, HSPC332, SAD1, SNRNP65	ubiquitin specific peptidase 39	0.101626	0.102151	0
XPO1	CRM1, emb, exp1	exportin 1	0	0.0172811	0
YTHDC2	CAHL	YTH domain containing 2	0.0123495	0.0244998	0
ZNF326	ZAN75, ZIRD, Zfp326, dJ871E2.1	zinc finger protein 326	0	0.0416233	0.0554435
mitochondrial proteins
ACLY	ACL, ATPCL, CLATP	ATP citrate lyase	0.0362043	0.0504032	0.0219727
AGK	CATC5, CTRCT38, MTDPS10, MULK	acylglycerol kinase	0	0.0336022	0
AIFM1	RP3-438D16.2, AIF, CMT2D, CMTX4, COWCK, COXPD6, NADMR, NAMSD, PDCD8	apoptosis inducing factor, mitochondria associated 1	0.0342988	0.0403226	0
ALDH18A1	ADCL3, ARCL3A, GSAS, P5CS, PYCS, SPG9A, SPG9B	aldehyde dehydrogenase 18 family member A1	0	0.0225056	0
ATAD3A	RP5-832C2.1;RP4-628J24.3, AAA-TOB3, TOB3	ATPase family, AAA domain containing 3A	0.0250156	0.0248139	0.0440705
ATAD3B	AAA-TOB3, TOB3	ATPase family, AAA domain containing 3B	0.0187617	0	0
ATIC	OK/SW-cl.86, AICAR, AICARFT, HEL-S-70p, IMPCHASE, PURH	5-aminoimidazole-4-carboxamide ribonucleotide formyltransferase/IMP cyclohydrolase	0.0174216	0.0645161	0.0446429
ATP5O	ATPO, HMC08D05, OSCP	ATP synthase, H+ transporting, mitochondrial F1 complex, O subunit	0.0406504	0.120968	0
ATP5A1	ATP5A, ATP5AL2, ATPM, COXPD22, HEL-S-123m, MC5DN4, MOM2, OMR, ORM, hATP1	ATP synthase, H+ transporting, mitochondrial F1 complex, alpha subunit 1, cardiac muscle	0.0487805	0.0752688	0.0520833
ATP5B	ATPMB, ATPSB, HEL-S-271	ATP synthase, H+ transporting, mitochondrial F1 complex, beta polypeptide	0.0650407	0.11828	0.0520833
ATP5C1	RP11-401E9.1, ATP5C, ATP5CL1	ATP synthase, H+ transporting, mitochondrial F1 complex, gamma polypeptide 1	0.0609756	0.0921659	0.0669643
BCKDK	BCKDKD, BDK	branched chain ketoacid dehydrogenase kinase	0	0.0384025	0
CCT7	CCTETA, CCTH, NIP7-1, TCP1ETA	chaperonin containing TCP1 subunit 7	0.0157356	0.062435	0.0604839
CKMT1B	CKMT, CKMT1, UMTCK	creatine kinase, mitochondrial 1B	0	0.0513196	0
COX2	COII, MTCO2	cytochrome c oxidase subunit II	0	0.107527	0
COX4I1	COX IV-1, COX4, COX4-1, COXIV, COXIV-1	cytochrome c oxidase subunit 4I1	0	0.0806452	0
CS		citrate synthase	0.0388027	0.058651	0
CYB5R3	B5R, DIA1	cytochrome b5 reductase 3	0.0406504	0.0537634	0.0520833
CYC1	MC3DN6, UQCR4	cytochrome c1	0.0304878	0	0
DAP3	DAP-3, MRP-S29, MRPS29, bMRP-10	death associated protein 3	0.111347	0.0911641	0.0951087
DARS2	ASPRS, LBSL, MT-ASPRS	aspartyl-tRNA synthetase 2, mitochondrial	0.0192555	0	0
DDX28	MDDX28	DEAD-box helicase 28	0	0.0189753	0
DHX29	DDX29	DEAH-box helicase 29	0	0.0509338	0
DHX30	DDX30, RETCOR	DEAH-box helicase 30	0.0626236	0.137315	0.0907939
DHX57	DDX57	DEAH-box helicase 57	0	0.027957	0.00833333
DLD	DLDD, DLDH, E3, GCSL, LAD, PHE3	dihydrolipoamide dehydrogenase	0	0.0387097	0
DNAJA3	HCA57, TID1, hTID-1	DnaJ heat shock protein family (Hsp40) member A3	0.0498891	0.058651	0.0284091
ECH1	HPXEL	enoyl-CoA hydratase 1	0.0834403	0.0764007	0
ECI2	ACBD2, DRS-1, DRS1, HCA88, PECI, dJ1013A10.3	enoyl-CoA delta isomerase 2	0.0243902	0	0
FASN	FAS, OA-519, SDR27X1	fatty acid synthase	0.0548308	0.103776	0.0738857
FKBP8	FKBP38, FKBPr38	FK506 binding protein 8	0	0.0339559	0
GLUD1	GDH, GDH1, GLUD	glutamate dehydrogenase 1	0.0609756	0.0201613	0
GOT2	KAT4, KATIV, mitAAT	glutamic-oxaloacetic transaminase 2	0.0234522	0.0372208	0.0240385
HADHA	ECHA, GBP, HADH, LCEH, LCHAD, MTPA, TP-ALPHA	hydroxyacyl-CoA dehydrogenase/3-ketoacyl-CoA thiolase/enoyl-CoA hydratase (trifunctional protein), alpha subunit	0.0906817	0.124069	0.0480769
HADHB	MSTP029, ECHB, MTPB, TP-BETA	hydroxyacyl-CoA dehydrogenase/3-ketoacyl-CoA thiolase/enoyl-CoA hydratase (trifunctional protein), beta subunit	0.0271003	0.0657109	0.0231481
HK1	HK, HK1-ta, HK1-tb, HK1-tc, HKD, HKI, HMSNR, HXK1, hexokinase	hexokinase 1	0	0.0179211	0.0115741
HSD17B4	DBP, MFE-2, MPF-2, PRLTS1, SDR8C1	hydroxysteroid 17-beta dehydrogenase 4	0.115359	0.122058	0
HSD17B10	17b-HSD10, ABAD, CAMR, DUPXp11.22, ERAB, HADH2, HCD2, MHBD, MRPP2, MRX17, MRX31, MRXS10, SCHAD, SDR5C1	hydroxysteroid 17-beta dehydrogenase 10	0.0609756	0	0.0669643
HSPA9	CRP40, CSA, EVPLS, GRP-75, GRP75, HEL-S-124m, HSPA9B, MOT, MOT2, MTHSP75, PBP74, SAAN, SIDBA4	heat shock protein family A (Hsp70) member 9	0.0417202	0.0551783	0
HSPD1	CPN60, GROEL, HLD4, HSP-60, HSP60, HSP65, HuCHA60, SPG13	heat shock protein family D (Hsp60) member 1	0.0668765	0.166493	0.115927
KARS	CMTRIB, DFNB891, KARS2, KRS, KARS	lysyl-tRNA synthetase	0.0647866	0.0504032	0
LACTB	G24, MRPL56	lactamase beta	0	0	0.0446429
LDHA	PIG19, GSD11, HEL-S-133P, LDH1, LDHM	lactate dehydrogenase A	0.0792683	0.120968	0.09375
LDHB	HEL-S-281, LDH-B, LDH-HD, TRG-5, LDHB	lactate dehydrogenase B	0.0706033	0.144312	0.0904605
LRPPRC		leucine rich pentatricopeptide repeat containing	0.00804074	0	0
MARS	METRS, MRS, MTRNS, SPG70	methionyl-tRNA synthetase	0.054878	0.0403226	0.0273437
MDH2	M-MDH, MDH, MGC:3559, MOR1	malate dehydrogenase 2	0.0696864	0.0844854	0.0818452
MRPL12	5c5-2, L12mt, MRP-L31/34, MRPL7, MRPL7/L12, RPML12	mitochondrial ribosomal protein L12	0.0853659	0	0
MRPL15	HSPC145, L15mt, MRP-L15, MRP-L7, RPML7	mitochondrial ribosomal protein L15	0	0	0.0551471
MRPL18	HSPC071, L18mt, MRP-L18	mitochondrial ribosomal protein L18	0	0	0.0625
MRPL21	L21mt, MRP-L21	mitochondrial ribosomal protein L21	0	0	0.0721154
MRPL22	HSPC158, L22mt, MRP-L22, MRP-L25, RPML25	mitochondrial ribosomal protein L22	0	0.134409	0
MRPL23	L23MRP, RPL23, RPL23L	mitochondrial ribosomal protein L23	0	0.100806	0.117188
MRPL24	L24mt, MRP-L18, MRP-L24	mitochondrial ribosomal protein L24	0	0	0.0625
MRPL38	HSPC262, L38MT, MRP-L3, MRP-L38, RPML3	mitochondrial ribosomal protein L38	0	0	0.0426136
MRPL4	CGI-28, L4mt	mitochondrial ribosomal protein L4	0	0	0.0367647
MRPL44	COXPD16, L44MT, MRP-L44	mitochondrial ribosomal protein L44	0	0	0.0411184
MRPS10	MSTP040, MRP-S10, PNAS-122	mitochondrial ribosomal protein S10	0.121951	0	0.0841346
MRPS11	HCC2, HCC-2	mitochondrial ribosomal protein S11	0.149051	0	0
MRPS14	DJ262D12.2, HSMRPS14, MRP-S14, S14mt	mitochondrial ribosomal protein S14	0.10453	0	0
MRPS15	DC37, MPR-S15, RPMS15, S15mt	mitochondrial ribosomal protein S15	0.11257	0.0744417	0.0841346
MRPS16	CGI-132, COXPD2, MRP-S16, RPMS16	mitochondrial ribosomal protein S16	0	0	0.0625
MRPS17	HSPC011, MRP-S17, RPMS17, S17mt	mitochondrial ribosomal protein S17	0	0.129032	0
MRPS18B	DADB-129D20.6, C6orf14, HSPC183, HumanS18a, MRP-S18-2, MRPS18-2, PTD017, S18amt	mitochondrial ribosomal protein S18B	0.0783972	0.0806452	0.078125
MRPS2	CGI-91, MRP-S2, S2mt	mitochondrial ribosomal protein S2	0.0914634	0.0564516	0.0703125
MRPS21	MDS016, MRP-S21, RPMS21	mitochondrial ribosomal protein S21	0.121951	0	0.104167
MRPS22	GK002, C3orf5, COXPD5, GIBT, MRP-S22, RPMS22	mitochondrial ribosomal protein S22	0.174973	0.105189	0.142663
MRPS23	CGI-138, HSPC329, MRP-S23	mitochondrial ribosomal protein S23	0.103189	0.0620347	0.0600962
MRPS25	MRP-S25, RPMS25	mitochondrial ribosomal protein S25	0.0443459	0.058651	0.0710227
MRPS26	C20orf193, GI008, MRP-S13, MRP-S26, MRPS13, NY-BR-87, RPMS13, dJ534B8.3	mitochondrial ribosomal protein S26	0.182927	0.16129	0.104167
MRPS27	MRP-S27, S27mt	mitochondrial ribosomal protein S27	0.097561	0.0774194	0.0875
MRPS28	HSPC007, MRP-S28, MRP-S35, MRPS35	mitochondrial ribosomal protein S28	0.168856	0	0
MRPS31	IMOGN38, MRP-S31, S31mt	mitochondrial ribosomal protein S31	0.196182	0.105189	0.108696
MRPS34	MRP-S12, MRP-S34, MRPS12	mitochondrial ribosomal protein S34	0.206379	0.16129	0.120192
MRPS35	HDCMD11P, MDS023, MRP-S28, MRPS28	mitochondrial ribosomal protein S35	0.175305	0.0907258	0.0683594
MRPS5	MRP-S5, S5mt	mitochondrial ribosomal protein S5	0.0926829	0	0.03125
MRPS6	C21orf101, MRP-S6, RPMS6, S6mt	mitochondrial ribosomal protein S6	0.0609756	0	0
MRPS7	MRP-S, MRP-S7, RP-S7, RPMS7, S7mt, bMRP27a	mitochondrial ribosomal protein S7	0.187617	0.0744417	0.0600962
MRPS9	MRP-S9, RPMS9, S9mt	mitochondrial ribosomal protein S9	0.0731707	0.0516129	0.05625
MTHFD1	MTHFC, MTHFD	methylenetetrahydrofolate dehydrogenase, cyclohydrolase and formyltetrahydrofolate synthetase 1	0.0253106	0.100426	0.026533
MTHFD1L	RP1-292B18.2, FTHFSDC1, MTC1THFS, dJ292B18.2	methylenetetrahydrofolate dehydrogenase (NADP+ dependent) 1-like	0.0149328	0.0493746	0
MTPAP	PAPD1, SPAX4	mitochondrial poly(A) polymerase	0.0210261	0.0278087	0
NDUFA9	CC6, CI-39k, CI39k, NDUFS2L, SDR22E1	NADH:ubiquinone oxidoreductase subunit A9	0.0424178	0.0350631	0
NIPSNAP1		nipsnap homolog 1 (C. elegans)	0	0.0403226	0
OAT	GACR, HOGAASE, OKT, OAT	ornithine aminotransferase	0.0498891	0.0513196	0.0497159
PGAM5	BXLBV68	PGAM family member 5, mitochondrial serine/threonine protein phosphatase	0.129125	0.142315	0
PHB	HEL-215, HEL-S-54e1, PHB	prohibitin	0.0573888	0.0664137	0
PHB2	BAP, BCAP37, Bap37, PNAS-141, REA, p22	prohibitin 2	0.0731707	0.0645161	0.0546875
PRDX4	AOE37-2, AOE372, HEL-S-97n, PRX-4	peroxiredoxin 4	0	0.0860215	0
PTCD3	TRG15, MRP-S39	pentatricopeptide repeat domain 3	0.11257	0.0951199	0.088141
PYCR2	HLD10, P5CR2	pyrroline-5-carboxylate reductase family member 2	0	0.0576037	0
RARS	ArgRS, DALRD1	arginyl-tRNA synthetase	0.0625391	0.0413565	0.0200321
RPL10A	CSA19, Csa-19, L10A, NEDD6	ribosomal protein L10a	0.32833	0.223325	0.336538
SFXN1		sideroflexin 1	0	0.0679117	0.0493421
SHMT2	GLYA, HEL-S-51e, SHMT	serine hydroxymethyltransferase 2	0.0668765	0.0520291	0
SLC25A11	OGC, SLC20A4	solute carrier family 25 member 11	0.0385109	0.0679117	0.0657895
SLC25A13	ARALAR2, CITRIN, CTLN2	solute carrier family 25 member 13	0.0394548	0.056926	0
SLC25A3	OK/SW-cl.48, PHC, PTP	solute carrier family 25 member 3	0.0522648	0.130568	0.0595238
SLC25A5	2F1, AAC2, ANT2, T2, T3	solute carrier family 25 member 5	0	0	0.0328947
SND1	TDRD11, p100	staphylococcal nuclease and tudor domain containing 1	0.0177384	0.0909091	0.0170455
TIMM50	PRO1512, TIM50, TIM50L	translocase of inner mitochondrial membrane 50	0.0762195	0.110887	0.126953
TRAP1	HSP 75, HSP75, HSP90L, TRAP-1	TNF receptor associated protein 1	0	0.0187547	0
TUFM	COXPD4, EF-TuMT, EFTU, P43	Tu translation elongation factor, mitochondrial	0.0393391	0.0364204	0
VDAC1	PORIN, VDAC-1	voltage dependent anion channel 1	0.071736	0.132827	0.137868
VDAC2	RP11-375G3.1, POR	voltage dependent anion channel 2	0.0685976	0.0907258	0.0585938
VDAC3	HD-VDAC3, VDAC-3	voltage dependent anion channel 3	0.0609756	0.0806452	0.0585938
Chromatin, DNA Damage, Cell Cycle proteins
ABT1	hABT1	activator of basal transcription 1	0.0469043	0.0620347	0
AIFM1	RP3-438D16.2, AIF, CMT2D, CMTX4, COWCK, COXPD6, NADMR, NAMSD, PDCD8	apoptosis inducing factor, mitochondria associated 1	0.0342988	0.0403226	0
ANKRD17	GTAR, MASK2, NY-BR-16	ankyrin repeat domain 17	0	0.00806452	0
ATXN2	ASL13, ATX2, SCA2, TNRC13	ataxin 2	0	0.0175316	0
AURKB	AIK2, AIM-1, AIM1, ARK2, AurB, IPL1, PPP1R48, STK12, STK5, aurkb-sv1, aurkb-sv2	aurora kinase B	0.029036	0	0
BAZ1B	WBSCR10, WBSCR9, WSTF	bromodomain adjacent to zinc finger domain 1B	0	0	0.00952744
BCLAF1	BTF, bK211L9.1	BCL2 associated transcription factor 1	0.0261324	0.0192012	0
C14orf169	MAPJD, NO66, ROX, URLC2, hsNO66	chromosome 14 open reading frame 169	0.0261324	0.0864055	0.16183
C1QBP	GC1QBP, HABP1, SF2p32, gC1Q-R, gC1qR, p32	complement C1q binding protein	0.148084	0.0806452	0.178571
CCAR2	DBC-1, DBC1, KIAA1967, NET35, p30 DBC, p30DBC	cell cycle and apoptosis regulator 2	0	0	0.0120192
CDC73	C1orf28, FIHP, HPTJT, HRPT1, HRPT2, HYX	cell division cycle 73	0.0209059	0.0184332	0
CHD4	CHD-4, Mi-2b, Mi2-BETA	chromodomain helicase DNA binding protein 4	0.0157356	0	0.0134409
CENPB		centromere protein B	0	0	0.03125
CHD1		chromodomain helicase DNA binding protein 1	0	0	0.00657895
CKAP4	CLIMP-63, ERGIC-63, p63	cytoskeleton associated protein 4	0.0375235	0.0454921	0
CKAP5	CHTOG, MSPS, TOG, TOGp, ch-TOG	cytoskeleton associated protein 5	0.0203252	0	0
CSNK1D	ASPS, CKIdelta, FASPS2, HCKID	casein kinase 1 delta	0	0.0322581	0
CSNK2A1	CK2A1, CKII, CSNK2A3	casein kinase 2 alpha 1	0	0.0460829	0.133929
CSNK2A2	CK2A2, CK2alpha', CSNK2A1	casein kinase 2 alpha 2	0	0.0322581	0
DCAF13	HSPC064, GM83, WDSOF1	DDB1 and CUL4 associated factor 13	0.0762195	0	0.0651042
DDB1	DDBA, UV-DDB1, XAP1, XPCE, XPE, XPE-BF	damage specific DNA binding protein 1	0	0	0.03125
DDX52	HUSSY-19, HUSSY19, ROK1	probable ATP-dependent RNA helicase DDX52	0.135017	0.0576037	0
DHX9	DDX9, LKP, NDH2, NDHII, RHA	DEAH-box helicase 9	0.164993	0.189753	0.29182
DNMT1	ADCADN, AIM, CXXC9, DNMT, HSN1E, MCMT, m.HsaI	DNA methyltransferase 1	0.00938086	0	0
DRG1	NEDD3	developmentally regulated GTP binding protein 1	0	0.0504032	0
EEF1E1		eukaryotic translation elongation factor 1 epsilon 1	0.0375235	0.0620347	0
EIF2AK2	RP11-545E17.7, CENP-32, HSPC109	eukaryotic translation initiation factor 2 alpha kinase 2	0.0762195	0.0268817	0
FUS	ALS6, ETM4, FUS1, HNRNPP2, POMP75, TLS	FUS RNA binding protein	0.050813	0	0
G3BP1	G3BP, HDH-VIII	G3BP stress granule assembly factor 1	0.146341	0.0887097	0
GTF2I	BAP135, BTKAP1, DIWS, GTFII-I, IB291, SPIN, TFII-I, WBS, WBSCR6	general transcription factor IIi	0.00886918	0	0
H1FX	H1.10, H1X	H1 histone family member X	0.097561	0	0
H2AFY	H2A.y, H2A/y, H2AF12M, H2AFJ, MACROH2A1.1, mH2A1, macroH2A1.2	H2A histone family member Y	0.0880759	0.0806452	0.0607639
HIST1H1C	H1.2, H1C, H1F2, H1s-1	histone cluster 1 H1 family member c	0	0.0921659	0.111607
HIST1H2AA	H2AA, H2AFR, TH2A, bA317E16.2	histone cluster 1 H2A family member a	0	0.107527	0
HIST1H2BD	H2B.1B, H2B/b, H2BFB, HIRIP2, dJ221C16.6	histone cluster 1 H2B family member d	0	0.564516	0.260417
HIST2H2AA4	H2A/R	histone cluster 2 H2A family member a4	0	0	0.5
HIST2H2AB	H2AB	histone cluster 2 H2A family member b	0.182927	0	0
HIST1H3F	H3/i, H3FI	histone cluster 1 H3 family member f	0	0.129032	0.15625
HIST1H4J	H4/e, H4F2iv, H4FE, dJ160A22.2	histone cluster 1 H4 family member j	0.365854	0.451613	0.28125
HNRNPK	RP11-575L7.1, CSBP, HNRPK, TUNP	heterogeneous nuclear ribonucleoprotein K	0.0682927	0.0387097	0
HNRNPU	RP11-11N7.3, HNRPU, SAF-A, U21.1, hnRNP U	heterogeneous nuclear ribonucleoprotein U	0.0826121	0.0988554	0.0907258
HP1BP3	HP1-BP74, HP1BP74	heterochromatin protein 1 binding protein 3	0	0	0.025
HSP90AA1	EL52, HSP86, HSP89A, HSP90A, HSP90N, HSPC1, HSPCA, HSPCAL1, HSPCAL4, HSPN, Hsp89, Hsp90, LAP-2, LAP2	heat shock protein 90 alpha family class A member 1	0.108767	0.113339	0.0886824
ILF2	RP11-354A16.1, NF45, PRO3063	interleukin enhancer binding factor 2	0.173299	0.127334	0.0575658
ILF3	CBTF, DRBF, DRBP76, MMP4, MPHOSPH4, MPP4, NF-AT-90, NF110, NF110b, NF90, NF90a, NF90b, NFAR, NFAR-1, NFAR2, TCP110, TCP80	interleukin enhancer binding factor 3	0.0667828	0.0729647	0.0855655
LBR	PRO0650, DHCR14B, LMN2R, PHA, TDRD18	lamin B receptor	0.0487805	0.0322581	0
MCM2	BM28, CCNL1, CDCL1, D3S3194, DFNA70, MITOTIN, cdc19	minichromosome maintenance complex component 2	0	0	0.021875
MCM3	HCC5, P1-MCM3, P1.h, RLFB	minichromosome maintenance complex component 3	0.0095648	0	0.0122549
MCM5	CDC46, P1-CDC46	minichromosome maintenance complex component 5	0	0	0.0152439
MCM7	CDC47, MCM2, P1.1-MCM3, P1CDC47, P85MCM, PNAS146, PPP1R104	minichromosome maintenance complex component 7	0	0	0.0234375
MED22	MED24, SURF5, surf-5	mediator complex subunit 22	0.0609756	0	0
MSH6	GTBP, GTMBP, HNPCC5, HSAP, p160	mutS homolog 6	0.0071736	0	0.0160846
MYBBP1A	P160, PAP2	MYB binding protein 1a	0.243902	0.123208	0.0824653
NAP1L1	NAP1, NAP1L, NRP	nucleosome assembly protein 1 like 1	0	0.0645161	0.0625
NCAPG2	CAP-G2, CAPG2, LUZP5, MTB, hCAP-G2	non-SMC condensin II complex subunit G2	0.0106045	0	0
NGDN	C14orf120, CANu1, LCP5, NGD, lpd-2	neuroguidin	0.0609756	0	0.078125
NKRF	ITBA4, NRF	NFKB repressing factor	0.029036	0	0.0260417
NME1	AWD, GAAD, NB, NBS, NDKA, NDPK-A, NDPKA, NM23, NM23-H1	NME/NM23 nucleoside diphosphate kinase 1	0.0487805	0	0.0625
NONO	NMT55, NRB54, P54, P54NRB, PPP1R114	non-POU domain containing, octamer-binding	0.411585	0.577957	0
NPM1	B23, NPM	nucleophosmin	0.558943	0.295699	0.195312
NSMCE3	HCA4, MAGEG1, MAGEL3, NDNL2, NSE3	NSE3 homolog, SMC5-SMC6 complex component	#N/A	#N/A	#N/A
PARP1	RP11-125A15.2, ADPRT, ADPRT 1, ADPRT1, ARTD1, PARP, PARP-1, PPOL, pADPRT-1	poly(ADP-ribose) polymerase 1	0.0609756	0.100806	0.0502232
PCID2	F10	PCI domain containing 2	0.021777	0	0
PDS5B		PDS5 cohesin associated factor B	0.0109443	0	0
POLR2B	POL2RB, RPB2, hRPB140	RNA polymerase II subunit B	0	0.0176411	0
POLR2E	RPABC1, RPB5, XAP4, hRPB25, hsRPB5	RNA polymerase II subunit E	0.065666	0	0
PRKDC	DNA-PKcs, DNAPK, DNPK1, HYRC, HYRC1, IMD26, XRCC7, p350	protein kinase, DNA-activated, catalytic polypeptide	0.0317476	0.057318	0.0335744
PRMT5	HRMT1L5, IBP72, JBP1, SKB1, SKB1Hs	protein arginine methyltransferase 5	0	0.028463	0
RAN	ARA24, Gsp1, TC4	RAN, member RAS oncogene family	0.0609756	0	0
RBBP7	RP11-716A19.5, RbAp46	RB binding protein 7, chromatin remodeling factor	0	0.0645161	0.0546875
RBM14	COAA, PSP2, SIP, SYTIP1, TMEM137	RNA binding motif protein 14	0.140713	0.0620347	0
RBMX	RP11-1114A5.1, HNRNPG, HNRPGP1, RBMXRT, RNMX, hnRNP-G, RBMX	RNA binding motif protein, X-linked	0.0609756	0.329912	0
RECQL	RECQL1, RecQ1	RecQ like helicase	0.0203252	0	0
RRP8	KIAA0409, NML	ribosomal RNA processing 8, methyltransferase, homolog (yeast)	0.0254065	0	0.0260417
RUVBL1	ECP54, INO80H, NMP238, PONTIN, Pontin52, RVB1, TIH1, TIP49, TIP49A	RuvB like AAA ATPase 1	0.0831486	0.117302	0.0852273
RUVBL2	CGI-46, ECP51, INO80J, REPTIN, RVB2, TIH2, TIP48, TIP49B	RuvB like AAA ATPase 2	0.0406504	0.0537634	0.0578704
SEH1L	SEC13L, SEH1A, SEH1B, Seh1	SEH1 like nucleoporin	0.0232288	0	0
SENP3	SMT3IP1, SSP3, Ulp1	SUMO1/sentrin/SMT3 specific peptidase 3	0.0562852	0.130273	0.0661058
SMARCA4	BAF190, BAF190A, BRG1, MRD16, RTPS2, SNF2, SNF2L4, SNF2LB, SWI2, hSNF2b	SWI/SNF related, matrix associated, actin dependent regulator of chromatin, subfamily a, member 4	0.0135501	0	0.015191
SMARCA5	ISWI, SNF2H, WCRF135, hISWI, hSNF2H	SWI/SNF related, matrix associated, actin dependent regulator of chromatin, subfamily a, member 5	0.0150094	0.0124069	0.0120192
SMC1A	RP6-29D12.1, CDLS2, DXS423E, SB1.8, SMC1, SMC1L1, SMC1alpha, SMCB	structural maintenance of chromosomes 1A	0.0699187	0.0344086	0
SMC2	PRO0324, CAP-E, CAPE, SMC-2L1, SMC2	structural maintenance of chromosomes 2	0.0163815	0.0120366	0
SMC3	BAM, BMH, CDLS3, CSPG6, HCAPL1, SMC3	structural maintenance of chromosomes 3	0.110095	0.047043	0
SMC4	CAP-C, CAPC, SMC-4, SMC4L1	structural maintenance of chromosomes 4	0.0167056	0	0
SMC5	SMC5L1	structural maintenance of chromosomes 5	0.009996	0	0
SMC6	SMC-6, SMC6L1, hSMC6	structural maintenance of chromosomes 6	0.0190549	0	0
SMCHD1		structural maintenance of chromosomes flexible hinge domain containing 1	0.0106045	0.00701262	0
SMU1	BWD, SMU-1, fSAP57	DNA replication regulator and spliceosomal factor	0.0325203	0	0
SND1	TDRD11, p100	staphylococcal nuclease and tudor domain containing 1	0.0177384	0.0909091	0.0170455
SNW1	Bx42, NCOA-62, PRPF45, Prp45, SKIIP, SKIP	SNW domain containing 1	0.0225836	0	0
SSRP1	FACT, FACT80, T160	structure specific recognition protein 1	0.0184775	0.0342131	0.0757576
SRPK2	SFRSK2	SRSF protein kinase 2	0.017934	0.0237192	0
STAG2	SA-2, SA2, SCC3B, bA517O1.1	stromal antigen 2	0.00952744	0	0
SUPT16H	CDC68, FACTP140, SPT16/CDC68	SPT16 homolog, facilitates chromatin remodeling subunit	0.0186027	0.0191361	0.0900424
THRAP3	TRAP150	thyroid hormone receptor associated protein 3	0.0110865	0	0
TOP1	TOPI	topoisomerase (DNA) I	0	0	0.014881
TOP2A	TOP2, TP2A	topoisomerase (DNA) II alpha	0.0264473	0.0233191	0.0677711
TOP2B	TOPIIB, top2beta	topoisomerase (DNA) II beta	0	0	0.0121528
TP53	BCC7, LFS1, P53, TRP53	tumor protein p53	0.029036	0	0
TRIM28	KAP1, PPP1R157, RNF96, TF1B, TIF1B	tripartite motif containing 28	0	0	0.0357143
UBB	HEL-S-50	ubiquitin B	0.0325203	0	0
USP36	KIAA1453	ubiquitin carboxyl-terminal hydrolase 36	0.0110865	0	0
VCP	ALS14, HEL-220, HEL-S-70, IBMPFD, IBMPFD1, TERA, p97	valosin containing protein	0.0304878	0.0769795	0.0284091
XRCC5	KARP-1, KARP1, KU80, KUB2, Ku86, NFIV	X-ray repair cross complementing 5	0.0213415	0.0725806	0.0429688
XRCC6	CTA-216E10.7, CTC75, CTCBF, G22P1, KU70, ML8, TLAA	X-ray repair cross complementing 6	0.0522648	0.129032	0.0714286
WHSC1	MMSET, NSD2, REIIBP, TRX5, WHS	Wolf-Hirschhorn syndrome candidate 1	0	0	0.00868056
Cytoskeletal proteins
ACTB	BRWS1, PS1TP5BP1	actin, cytoplasmic 1	0.146341	0.0483871	0
ACTN4	ACTININ-4, FSGS, FSGS1	actinin alpha 4	0.0326655	0.0547235	0.0585938
ACTR2	ARP2	ARP2 actin related protein 2 homolog	0	0.0358423	0
CFL1	CFL, HEL-S-15, cofilin	cofilin 1	0.0443459	0.131965	0
CKAP4	CLIMP-63, ERGIC-63, p63	cytoskeleton associated protein 4	0.0375235	0.0454921	0
CKAP5	CHTOG, MSPS, TOG, TOGp, ch-TOG	cytoskeleton associated protein 5	0.0203252	0	0
DYNC1H1	DHC1, DHC1a, DNCH1, DNCL, DNECL, DYHC, Dnchc1, HL-3, SMALED1, p22	dynein cytoplasmic 1 heavy chain 1	0.0138058	0.0304321	0.0117925
EMD	EDMD, LEMD5, STA	emerin	0.0406504	0	0.0625
EPPK1	EPIPL	epiplakin	0	0	0.0023855
FLII	FLI, FLIL, Fli1	FLII, actin remodeling protein	0.0107604	0.0118596	0
FLNA	XX-FW83128A1.1, ABP-280, ABPX, CSBS, CVD1, FLN, FLN-A, FLN1, FMD, MNS, NHBP, OPD, OPD1, OPD2, XLVD, XMVD	filamin A	0.0184243	0.0313298	0.00899281
KIF2A	CDCBM3, HK2, KIF2	kinesin family member 2A	0.0224647	0	0
KIF14	MKS12	kinesin family member 14	0.005978	0	0
KIF23	CHO1, KNSL5, MKLP-1, MKLP1	kinesin family member 23	0.0158085	0	0
LBR	PRO0650, DHCR14B, LMN2R, PHA, TDRD18	lamin B receptor	0.0487805	0.0322581	0
LMNB1	ADLD, LMN, LMN2, LMNB	lamin B1	0.0135501	0	0
MATR3	ALS21, MPD2, VCPDM	matrin 3	0.0637472	0.0879765	0.145597
MYH10	NMMHC-IIB, NMMHCB	myosin heavy chain 10	0.0227946	0.0316551	0.0233645
MYH9	RP1-68O2.1, BDPLT6, DFNA17, EPSTS, FTNS, MHA, NMHC-II-A, NMMHC-IIA, NMMHCA	myosin heavy chain 9	0.0268516	0.0429121	0.0200688
MYL12B	MLC-B, MRLC2	myosin light chain 12B	0.0948509	0.0896057	0
MYO1B	myr1	myosin IB	0.0187617	0.0223325	0.0216346
MYO1C	MMI-beta, MMIb, NMI, myr2	myosin IC	0.0279888	0.0185087	0.0153689
MYO1D	PPP1R108, myr4	myosin ID	0.0190549	0.0176411	0
MYO5A	GS1, MYH12, MYO5, MYR12	myosin VA	0.0144124	0.0249267	0
MYL6	ESMLC, LC17, LC17-GI, LC17-NM, LC17A, LC17B, MLC-3, MLC1SM, MLC3NM, MLC3SM	myosin light chain 6	0.0853659	0.0806452	0
NUMA1	NMP-22, NUMA	nuclear mitotic apparatus protein 1	0.00403145	0	0
PRC1	ASE1	protein regulator of cytokinesis 1	0.017934	0	0
RACGAP1	CYK4, HsCYK-4, ID-GAP, MgcRacGAP	Rac GTPase activating protein 1	0.0203252	0	0
RAN	ARA24, Gsp1, TC4	RAN, member RAS oncogene family	0.0609756	0	0
SPTBN1	ELF, HEL102, SPTB2, betaSpII	spectrin beta, non-erythrocytic 1	0	0.00667408	0
TUBA1B	K-ALPHA-1	tubulin alpha 1b	0	0.282258	0.30599
TUBAL3		tubulin alpha like 3	0.0469043	0	0
TUBB	DAAP-285E11.4, CDCBM6, M40, OK/SW-cl.561, TUBB5, TUBB	tubulin beta class I	0.0318134	0.0280505	0
TUBB2B	RP11-506K6.1, PMGYSA, bA506K6.1	tubulin beta 2B class IIb	0	0	0.0611413
TUBB4B	RP13-122B23.2, Beta2, TUBB2, TUBB2C	tubulin beta 4B class IVb	0.0212089	0.0631136	0.0339674
TUBB6	HsT1601, TUBB-5	tubulin beta 6 class V	0	0.056101	0.0271739
TUBGCP2	GCP-2, GCP2, Grip103, SPBC97, Spc97p, h103p, hGCP2, hSpc97	tubulin gamma complex associated protein 2	0.0199557	0	0
Miscellaneous
ABCD3	ABC43, CBAS5, PMP70, PXMP1, ZWS2	ATP binding cassette subfamily D member 3	0.0164799	0.021796	0
AHCY	SAHH, adoHcyase	adenosylhomocysteinase	0.0536585	0.116129	0.075
AIMP1	EMAP2, EMAPII, HLD3, SCYE1, p43	aminoacyl tRNA synthetase complex interacting multifunctional protein 1	0.0609756	0.0448029	0
AIMP2	JTV-1, JTV1, P38	aminoacyl tRNA synthetase complex interacting multifunctional protein 2	0.0271003	0	0
AKR1B1	ADR, ALDR1, ALR2, AR	aldo-keto reductase family 1 member B	0	0.0358423	0
ALDH3A2	ALDH10, FALDH, SLS	aldehyde dehydrogenase 3 family member A2	0.0195122	0	0
ALDOA	ALDA, GSD12, HEL-S-87p	aldolase, fructose-bisphosphate A	0.0670732	0.193548	0.109375
ANXA2	ANX2, ANX2L4, CAL1H, HEL-S-270, LIP2, LPC2, LPC2D, P36, PAP-IV	annexin A2	0.029036	0.0691244	0
ARF1		ADP ribosylation factor 1	0.0886918	0.117302	0.142045
ARHGEF2	RP11-336K24.3, GEF, GEF-H1, GEFH1, LFP40, P40	Rho/Rac guanine nucleotide exchange factor 2	0.012837	0.0141483	0
ASNS	ASNSD, TS11	asparagine synthetase (glutamine-hydrolyzing)	0.0143472	0.028463	0.0229779
ATP1A1	RP4-655J12.1	ATPase Na+/K+ transporting subunit alpha 1	0.0560976	0.0548387	0.0375
ATP2A2	ATP2B, DAR, DD, SERCA2	ATPase sarcoplasmic/endoplasmic reticulum Ca2+ transporting 2	0.0207087	0.0334753	0
ATP2B1	PMCA1, PMCA1kb	ATPase plasma membrane Ca2+ transporting 1	0	0.0141483	0
ATXN2L	A2D, A2LG, A2LP, A2RP	ataxin 2 like	0	0.0944138	0
BAG2	BAG-2, dJ417I1.2	BCL2 associated athanogene 2	0	0.0460829	0
C18orf63	DKFZP781G0119	chromosome 18 open reading frame 63	0.0113443	0	0
CAD		carbamoyl-phosphate synthetase 2, aspartate transcarbamylase, and dihydroorotase	0	0	0.0846354
CAND1	TIP120, TIP120A	cullin associated and neddylation dissociated 1	0.0277162	0.0415445	0.0142045
CBR1	CBR, SDR21C1, hCBR1	carbonyl reductase 1	0	0.0403226	0
CCDC137	RaRF	coiled-coil domain containing 137	0.21777	0	0.15625
CCDC86	CYCLON	coiled-coil domain containing 86	0.128726	0.0537634	0.138889
CKB	B-CK, BCKB, HEL-211, HEL-S-29, CKB	creatine kinase B	0.0926829	0.0322581	0
CLTC	CHC, CHC17, CLH-17L2, Hc, CLTC	clathrin heavy chain	0.0406504	0.0698925	0.0381944
COIL	CLN80, p80-coilin	coilin	0.0294365	0	0.0323276
COPA	HEP-COP	coatomer protein complex subunit alpha	0.0304878	0.0425627	0.0238715
CTPS1	CTPS, IMD24	CTP synthase 1	0	0.0244379	0
CYFIP2	KIAA1168, PIR121	cytoplasmic FMR1-interacting protein 2	0.00813008	0.0129032	0
DARS	PIG40, HBSL, aspRS	aspartyl-tRNA synthetase	0.0758075	0.0610288	0
DDOST	OK/SW-cl.45, AGER1, CDG1R, OKSWcl45, OST, OST48, WBP1	dolichyl-diphosphooligosaccharide--protein glycosyltransferase non-catalytic subunit	0	0.0768049	0.0446429
DOCK7	EIEE23, ZIR2	dedicator of cytokinesis 7	0.0040992	0	0
DNAJA1	RP11-54K16.1, DJ-2, DjA1, HDJ2, HSDJ, HSJ2, HSPF4, NEDD7, hDJ-2	DnaJ heat shock protein family (Hsp40) member A1	0.0320924	0.0679117	0.0328947
DNAJC13	RME8	DnaJ heat shock protein family (Hsp40) member C13	0	0.0685484	0
DPM1	CDGIE, MPDS	dolichyl-phosphate mannosyltransferase subunit 1, catalytic	0	0.0504032	0
EMC1	CAVIPMR, KIAA0090	ER membrane protein complex subunit 1	0.0135501	0	0
ENO1	ENO1L1, MPB1, NNE, PPH	enolase 1	0.190244	0.251613	0.1625
EPRS	PIG32, EARS, GLUPRORS, PARS, QARS, QPRS	glutamyl-prolyl-tRNA synthetase	0.089939	0.0524194	0
EZR	CVIL, CVL, HEL-S-105, VIL2	ezrin	0.0224647	0	0
FAM207A	PRED56, C21orf70	family with sequence similarity 207 member A	0.0711382	0	0
FARSA	CML33, FARSL, FARSLA, FRSA, PheHA	phenylalanyl-tRNA synthetase alpha subunit	0.103189	0	0
FARSB	HSPC173, FARSLB, FRSB, PheHB, PheRS	phenylalanyl-tRNA synthetase beta subunit	0.0932568	0.028463	0.0183824
GANAB	G2AN, GLUII	glucosidase II alpha subunit	0	0.0296248	0.0255102
GAPDH	CDABP0047, G3PD, GAPD, HEL-S-162eP	glyceraldehyde-3-phosphate dehydrogenase	0.208034	0.237192	0.238971
GART	AIRS, GARSF, PAIS, PGFT, PRGS, GART	phosphoribosylglycinamide formyltransferase, phosphoribosylglycinamide synthetase, phosphoribosylaminoimidazole synthetase	0.0286944	0.0506009	0.0275735
GDI2	RP11-318E3.2, HEL-S-46e, RABGDIB	GDP dissociation inhibitor 2	0.0391986	0.0403226	0.0223214
GLO1	GLOD1, GLYI, HEL-S-74	glyoxalase I	0	0	0.0568182
GLYR1	BM045, HIBDL, N-PAC, NP60	glyoxylate reductase 1 homolog	0.0180668	0	0.0289352
GNB4	CMTD1F	G protein subunit beta 4	0	0.0379507	0
GPI	AMF, GNPI, NLK, PGI, PHI, SA-36, SA36	glucose-6-phosphate isomerase	0.0858175	0.167264	0.0983796
HMMR	CD168, IHABP, RHAMM	hyaluronan mediated motility receptor	0.0152439	0	0
HPRT1	HGPRT, HPRT	hypoxanthine phosphoribosyltransferase 1	0.0711382	0.120968	0.0911458
HSP90B1	ECGP, GP96, GRP94, HEL-S-125m, HEL35, TRA1	heat shock protein 90 beta family member 1	0.0249446	0.0293255	0.0390625
HSPA1B	HSP70-1B, HSP70-2, HSP70.2	heat shock protein family A (Hsp70) member 1B	0.114778	0.132827	0.0643382
HSPA1L	HSP70-1L, HSP70-HOM, HSP70T, hum70t	heat shock protein family A (Hsp70) member 1 like	0.0430416	0.0426945	0
HSPA4	APG-2, HEL-S-5a, HS24/P52, HSPH2, RY, hsp70, hsp70RY	heat shock protein family A (Hsp70) member 4	0.0184077	0.0152161	0.0176887
HSP90AB1	D6S182, HSP84, HSP90B, HSPC2, HSPCB	heat shock protein 90 alpha family class B member 1	0.012837	0.0382003	0
IARS	RP11-62C3.11, ILERS, ILRS, IRS, PRO0785, IARS	isoleucyl-tRNA synthetase	0.0457317	0.0453629	0.0170898
IMPDH2	IMPD2, IMPDH-II	inosine monophosphate dehydrogenase 2	0	0	0.03125
IQGAP1	HUMORFA01, SAR1, p195	IQ motif containing GTPase activating protein 1	0.0367323	0.0213758	0
IRS4	IRS-4, PY160	insulin receptor substrate 4	0.0334382	0.0546306	0.0252016
LARS	HSPC192, ILFS11, LEURS, LEUS, LFIS, LRS, PIG44, RNTLS, hr025Cl, LARS	leucyl-tRNA synthetase	0.0561363	0.0614439	0
LBR	PRO0650, DHCR14B, LMN2R, PHA, TDRD18	lamin B receptor	0.0487805	0.0322581	0
LLPH	C12orf31, hLLP	LLP homolog, long-term synaptic facilitation	0.325203	0.591398	0.520833
LRRC59	PRO1855, p34	leucine rich repeat containing 59	0.139373	0.138249	0.0446429
LSM12	PNAS-135	LSM12 homolog	0	0.107527	0
MTDH	3D3, AEG-1, AEG1, LYRIC, LYRIC/3D3	metadherin	0	0.0748848	0
NME1-NME2	NM23-LV, NMELV	NME1-NME2 readthrough	0	0.107527	0.0372024
MOGS	CDG2B, CWH41, DER7, GCS1	mannosyl-oligosaccharide glucosidase	0.036031	0.0256598	0
NMT1	NMT	N-myristoyltransferase 1	0	0.0336022	0
NUP155	ATFB15, N155	nucleoporin 155	0.010921	0	0.0116604
NUP210	GP210, POM210	nucleoporin 210	0	0.00960061	0
NUP205	C7orf14, NPHS13	nucleoporin 205	0.00502892	0	0
PAICS	ADE2, ADE2H1, AIRC, PAIS	phosphoribosylaminoimidazole carboxylase; phosphoribosylaminoimidazolesuccinocarboxamide synthase	0	0	0.0284091
PDIA3	ER60, ERp57, ERp60, ERp61, GRP57, GRP58, HEL-S-269, HEL-S-93n, HsT17083, P58, PI-PLC	protein disulfide isomerase family A member 3	0	0.0611791	0.0323276
PDIA4	ERP70, ERP72, ERp-72	protein disulfide isomerase family A member 4	0	0	0.0164474
PDIA6	ERP5, P5, TXNDC7	protein disulfide isomerase family A member 6	0.054878	0.0322581	0
PFKP	RP11-298E9.2, ATP-PFK, PFK-C, PFK-P, PFKF	phosphofructokinase, platelet	0.0288832	0.0297114	0.0205592
PGAM1	HEL-S-35, PGAM-B, PGAMA	phosphoglycerate mutase 1	0.0562852	0.0868486	0.0721154
PGK1	RP4-570L12.1, HEL-S-68p, MIG10, PGKA	phosphoglycerate kinase 1	0.0304878	0.0537634	0.0325521
P4HB	CLCRP1, DSI, ERBA2L, GIT, P4Hbeta, PDI, PDIA1, PHDB, PO4DB, PO4HB, PROHB	prolyl 4-hydroxylase subunit beta	0.0237127	0.031362	0.0173611
PHIP	BRWD2, DCAF14, WDR11, ndrp	pleckstrin homology domain interacting protein	0	0	0.0120192
PHGDH	3-PGDH, 3PGDH, HEL-S-113, NLS, NLS1, PDG, PGAD, PGD, PGDH, PHGDHD, SERA	phosphoglycerate dehydrogenase	0.0195122	0.0322581	0.03125
PKM	CTHBP, HEL-S-30, OIP3, PK32, TCB, THBP1, PKM	pyruvate kinase, muscle	0.110149	0.156087	0.0907258
PPIA	CYPA, CYPH, HEL-S-69p	peptidylprolyl isomerase A	0.137195	0.181452	0.195312
PPP2R2A	B55A, B55ALPHA, PR52A, PR55A	protein phosphatase 2 regulatory subunit Balpha	0	0.0366569	0
PRRC2C	BAT2-iso, BAT2D1, BAT2L2, XTP2	proline rich coiled-coil 2C	0	0.0144243	0
PRDX1	MSP23, NKEF-A, NKEFA, PAG, PAGA, PAGB, PRX1, PRXI, TDPX2	peroxiredoxin 1	0	0	0.0841346
PRDX2	HEL-S-2a, NKEF-B, NKEFB, PRP, PRX2, PRXII, PTX1, TDPX1, TPX1, TSA	peroxiredoxin 2	0	0	0.0710227
PRDX6	1-Cys, AOP2, HEL-S-128m, NSGPx, PRX, aiPLA2, p29	peroxiredoxin 6	0.0522648	0	0.0892857
PRPS1	ARTS, CMTX5, DFN2, DFNX1, PPRibP, PRS-I, PRSI	phosphoribosyl pyrophosphate synthetase 1	0.0304878	0	0
PTPLAD1	B-IND1, BIND1, HACD3, HSPC121	Very-long-chain (3R)-3-hydroxyacyl-CoA dehydratase 3	0.0430416	0.0664137	0.0827206
QARS	GLNRS, MSCCA, PRO2195	glutaminyl-tRNA synthetase	0.0573888	0.0506009	0
RAB7A	PRO2706, RAB7	RAB7A, member RAS oncogene family	0	0.0379507	0
RAB10		RAB10, member RAS oncogene family	0.0469043	0	0.0721154
RANBP2	ADANE, ANE1, IIAE3, NUP358, TRP1, TRP2	RAN binding protein 2	0	0.00520291	0
RAP1B	K-REV, RAL1B	RAP1B, member of RAS oncogene family	0	0.0806452	0
RPN1	OST1, RBPH1	ribophorin I	0.0243902	0.0552995	0.0446429
RPN2	RP3-343K2.2, RIBIIR, RPN-II, RPNII, SWP1	ribophorin II	0.0261324	0.0633641	0.0334821
SRFBP1	BUD22, P49, Rlb1, STRAP, p49/STRAP	serum response factor binding protein 1	0.0203252	0	0
SSB	LARP3, La, La/SSB	Sjogren syndrome antigen B	0.0212089	0	0
SSR4	CDG1Y, TRAPD	signal sequence receptor subunit 4	0.0443459	0.0879765	0
STRAP	MAWD, PT-WD, UNRIP	serine/threonine kinase receptor associated protein	0.0212089	0.0350631	0
STT3A	ITM1, STT3-A, TMC	STT3A, catalytic subunit of the oligosaccharyltransferase complex	0.0164799	0.021796	0
SURF4	ERV29	surfeit 4	0.0609756	0.0806452	0
TARS	ThrRS	threonyl-tRNA synthetase	0.0113443	0.0262566	0.0399709
TMPO	CMD1T, LAP2, LEMD4, PRO0868, TP	thymopoietin	0.0164799	0	0.0295608
TBL2	WBSCR13, WS-betaTRP	transducin beta like 2	0.0180668	0.0298686	0
TECR	GPSN2, MRT14, SC2, TER	trans-2,3-enoyl-CoA reductase	0.071736	0.0948767	0
TKT	HEL107, TK1, TKT	transketolase	0.0169377	0.0672043	0.0390625
TRIM25	EFP, RNF147, Z147, ZNF147	tripartite motif containing 25	0.0418118	0	0
TRMT1L	C1orf25, MST070, MSTP070, TRM1L, bG120K12.3	tRNA methyltransferase 1 like	0.0152439	0	0
TROVE2	RO60, RORNP, SSA2	TROVE domain family member 2	0.0252313	0	0
TXLNA	IL14, TXLN	taxilin alpha	0	0.0215054	0
TXLNG	CXorf15, ELRG, FIAT, LSR5, TXLNGX	taxilin gamma	0	0.0288018	0
VARS	G7A, VARS1, VARS2	valyl-tRNA synthetase	0	0.0124069	0
VCP	ALS14, HEL-220, HEL-S-70, IBMPFD, IBMPFD1, TERA, p97	valosin containing protein	0.0304878	0.0769795	0.0284091
VTN		vitronectin	0	0	0.0426136
YWHAE	14-3-3E, HEL2, KCIP-1, MDCR, MDS	tyrosine 3-monooxygenase/tryptophan 5-monooxygenase activation protein epsilon	0.0573888	0.0664137	0.0551471
ZBTB11	ZNF-U69274, ZNF913	zinc finger and BTB domain containing 11	0	0	0.0183824
ZCCHC3	C20orf99	zinc finger CCHC-type containing 3	0	0.109677	0
ZFP30	ZNF745	ZFP30 zinc finger protein	0	0	0.0323276
ZNF512		zinc finger protein 512	0	0	0.0347222
ZNF598		zinc finger protein 598	0.0198525	0	0

## Sheet: Table S4 Corum complexes
Complex	Prey in complex	100 mM NaCl without Rnase A				100 mM NaCl with Rnase A				300 mM NaCl with Rnase A
		avg TSC	in silico pept/prot	avg TSC/in silico pept	(prey avg TSC/in silico pept) / (Nol12 avg TSC/in silico pept)	avg TSC	in silico pept/prot	avg TSC/in silico pept	(prey avg TSC/in silico pept) / (Nol12 avg TSC/in silico pept)	avg TSC	in silico pept/prot	avg TSC/in silico pept	(prey avg TSC/in silico pept) / (Nol12 avg TSC/in silico pept)
Nop56p-associated pre-rRNA complex	BRIX1	26.5	18	1.47222	0.359079	14	18	0.777778	0.250896	31	18	1.72222	0.538194
Nop56p-associated pre-rRNA complex	DDX21	50.5	42	1.20238	0.293264	42	42	1	0.322581	33.5	42	0.797619	0.249256
Nop56p-associated pre-rRNA complex	DHX9	46	68	0.676471	0.164993	40	68	0.588235	0.189753	63.5	68	0.933824	0.29182
Nop56p-associated pre-rRNA complex	EBNA1BP2	19	16	1.1875	0.289634	12	16	0.75	0.241935	30.5	16	1.90625	0.595703
Nop56p-associated pre-rRNA complex	EEF2	19	49	0.387755	0.0945744	31	49	0.632653	0.204082	19	49	0.387755	0.121173
Nop56p-associated pre-rRNA complex	FBL	22	19	1.15789	0.282413	9	19	0.473684	0.152801	9	19	0.473684	0.148026
Nop56p-associated pre-rRNA complex	GNL3	32	26	1.23077	0.300188	24	26	0.923077	0.297767	37.5	26	1.44231	0.450721
Nop56p-associated pre-rRNA complex	H1FX	4	10	0.4	0.097561	0		0	0	0		0	0
Nop56p-associated pre-rRNA complex	HNRNPA1	9.5	17	0.558824	0.136298	0		0	0	0		0	0
Nop56p-associated pre-rRNA complex	HNRNPM	48	45	1.06667	0.260163	14	45	0.311111	0.100358	20	45	0.444444	0.138889
Nop56p-associated pre-rRNA complex	HNRNPU	10.5	31	0.33871	0.0826121	9.5	31	0.306452	0.0988554	9	31	0.290323	0.0907258
Nop56p-associated pre-rRNA complex	IGF2BP1	8.5	31	0.274194	0.0668765	7	31	0.225806	0.0728408	3	31	0.0967742	0.0302419
Nop56p-associated pre-rRNA complex	ILF2	13.5	19	0.710526	0.173299	7.5	19	0.394737	0.127334	3.5	19	0.184211	0.0575658
Nop56p-associated pre-rRNA complex	ILF3	11.5	42	0.27381	0.0667828	9.5	42	0.22619	0.0729647	11.5	42	0.27381	0.0855655
Nop56p-associated pre-rRNA complex	LYAR	3.5	19	0.184211	0.0449294	5.5	19	0.289474	0.0933786	0		0	0
Nop56p-associated pre-rRNA complex	MYBBP1A	72	72	1	0.243902	27.5	72	0.381944	0.123208	19	72	0.263889	0.0824653
Nop56p-associated pre-rRNA complex	NAP1L1	0		0	0	3	15	0.2	0.0645161	3	15	0.2	0.0625
Nop56p-associated pre-rRNA complex	NCL	18	31	0.580645	0.141621	0		0	0	0		0	0
Nop56p-associated pre-rRNA complex	NHP2L1	4.5	7	0.642857	0.156794	0		0	0	0		0	0
Nop56p-associated pre-rRNA complex	NOLC1	11.5	33	0.348485	0.0849963	0		0	0	0		0	0
Nop56p-associated pre-rRNA complex	NOP56	23	32	0.71875	0.175305	3.5	32	0.109375	0.0352823	14.5	32	0.453125	0.141602
Nop56p-associated pre-rRNA complex	NOP58	21	25	0.84	0.204878	9	25	0.36	0.116129	12	25	0.48	0.15
Nop56p-associated pre-rRNA complex	NPM1	27.5	12	2.29167	0.558943	11	12	0.916667	0.295699	7.5	12	0.625	0.195312
Nop56p-associated pre-rRNA complex	PWP1	0		0	0	0		0	0	6	21	0.285714	0.0892857
Nop56p-associated pre-rRNA complex	RBM28	16	36	0.444444	0.108401	7	36	0.194444	0.062724	18.5	36	0.513889	0.16059
Nop56p-associated pre-rRNA complex	RPL10	8	8	1	0.243902	11	8	1.375	0.443548	10.5	8	1.3125	0.410156
Nop56p-associated pre-rRNA complex	RPL10A	17.5	13	1.34615	0.32833	9	13	0.692308	0.223325	14	13	1.07692	0.336538
Nop56p-associated pre-rRNA complex	RPL11	4.5	8	0.5625	0.137195	7	8	0.875	0.282258	4.5	8	0.5625	0.175781
Nop56p-associated pre-rRNA complex	RPL12	12	7	1.71429	0.418118	14.5	7	2.07143	0.668203	13	7	1.85714	0.580357
Nop56p-associated pre-rRNA complex	RPL13	22	11	2	0.487805	38	11	3.45455	1.11437	36.5	11	3.31818	1.03693
Nop56p-associated pre-rRNA complex	RPL13A	15	10	1.5	0.365854	32.5	10	3.25	1.04839	41.5	10	4.15	1.29688
Nop56p-associated pre-rRNA complex	RPL14	7	7	1	0.243902	10.5	7	1.5	0.483871	10	7	1.42857	0.446429
Nop56p-associated pre-rRNA complex	RPL15	14	12	1.16667	0.284553	19.5	12	1.625	0.524194	18	12	1.5	0.46875
Nop56p-associated pre-rRNA complex	RPL17	19.5	8	2.4375	0.594512	34	8	4.25	1.37097	40	8	5	1.5625
Nop56p-associated pre-rRNA complex	RPL18	10.5	7	1.5	0.365854	13.5	7	1.92857	0.62212	17.5	7	2.5	0.78125
Nop56p-associated pre-rRNA complex	RPL18A	10	12	0.833333	0.203252	8.5	12	0.708333	0.228495	12.5	12	1.04167	0.325521
Nop56p-associated pre-rRNA complex	RPL19	8	5	1.6	0.390244	6.5	5	1.3	0.419355	11	5	2.2	0.6875
Nop56p-associated pre-rRNA complex	RPL21	11	7	1.57143	0.383275	20	7	2.85714	0.921659	19	7	2.71429	0.848214
Nop56p-associated pre-rRNA complex	RPL22	5.5	5	1.1	0.268293	4	5	0.8	0.258065	2.5	5	0.5	0.15625
Nop56p-associated pre-rRNA complex	RPL23	9.5	8	1.1875	0.289634	24	8	3	0.967742	6	8	0.75	0.234375
Nop56p-associated pre-rRNA complex	RPL23A	12.5	6	2.08333	0.50813	25	6	4.16667	1.34409	16	6	2.66667	0.833333
Nop56p-associated pre-rRNA complex	RPL24	4	8	0.5	0.121951	7	8	0.875	0.282258	3	8	0.375	0.117188
Nop56p-associated pre-rRNA complex	RPL26	12	7	1.71429	0.418118	12.5	7	1.78571	0.576037	12.5	7	1.78571	0.558036
Nop56p-associated pre-rRNA complex	RPL27	5.5	5	1.1	0.268293	14.5	5	2.9	0.935484	8	5	1.6	0.5
Nop56p-associated pre-rRNA complex	RPL27A	5	7	0.714286	0.174216	6.5	7	0.928571	0.299539	6.5	7	0.928571	0.290179
Nop56p-associated pre-rRNA complex	RPL28	18.5	8	2.3125	0.564024	13	8	1.625	0.524194	22	8	2.75	0.859375
Nop56p-associated pre-rRNA complex	RPL29	3	4	0.75	0.182927	4	4	1	0.322581	3.5	4	0.875	0.273438
Nop56p-associated pre-rRNA complex	RPL3	37.5	19	1.97368	0.481386	44	19	2.31579	0.747029	35.5	19	1.86842	0.583882
Nop56p-associated pre-rRNA complex	RPL30	10.5	6	1.75	0.426829	13	6	2.16667	0.698925	11.5	6	1.91667	0.598958
Nop56p-associated pre-rRNA complex	RPL31	5.5	7	0.785714	0.191638	11.5	7	1.64286	0.529954	6	7	0.857143	0.267857
Nop56p-associated pre-rRNA complex	RPL32	11.5	7	1.64286	0.400697	17.5	7	2.5	0.806452	23.5	7	3.35714	1.04911
Nop56p-associated pre-rRNA complex	RPL35	6.5	4	1.625	0.396341	8	4	2	0.645161	6.5	4	1.625	0.507812
Nop56p-associated pre-rRNA complex	RPL35A	9	7	1.28571	0.313589	11.5	7	1.64286	0.529954	18.5	7	2.64286	0.825893
Nop56p-associated pre-rRNA complex	RPL36	5.5	3	1.83333	0.447154	9.5	3	3.16667	1.02151	8.5	3	2.83333	0.885417
Nop56p-associated pre-rRNA complex	RPL37A	4	4	1	0.243902	17	4	4.25	1.37097	17	4	4.25	1.32812
Nop56p-associated pre-rRNA complex	RPL4	22	17	1.29412	0.315638	31.5	17	1.85294	0.597723	40	17	2.35294	0.735294
Nop56p-associated pre-rRNA complex	RPL5	23.5	13	1.80769	0.440901	16	13	1.23077	0.397022	17	13	1.30769	0.408654
Nop56p-associated pre-rRNA complex	RPL6	30.5	15	2.03333	0.495935	33	15	2.2	0.709677	44	15	2.93333	0.916667
Nop56p-associated pre-rRNA complex	RPL7	20	13	1.53846	0.375235	26	13	2	0.645161	31.5	13	2.42308	0.757212
Nop56p-associated pre-rRNA complex	RPL7A	16.5	12	1.375	0.335366	18.5	12	1.54167	0.497312	23.5	12	1.95833	0.611979
Nop56p-associated pre-rRNA complex	RPL8	10.5	8	1.3125	0.320122	16	8	2	0.645161	21	8	2.625	0.820312
Nop56p-associated pre-rRNA complex	RPL9	11.5	8	1.4375	0.35061	20	8	2.5	0.806452	8	8	1	0.3125
Nop56p-associated pre-rRNA complex	RPLP0	17	16	1.0625	0.259146	27	16	1.6875	0.544355	23.5	16	1.46875	0.458984
Nop56p-associated pre-rRNA complex	RPLP2	12	6	2	0.487805	14	6	2.33333	0.752688	14.5	6	2.41667	0.755208
Nop56p-associated pre-rRNA complex	RPS11	6	9	0.666667	0.162602	9	9	1	0.322581	8	9	0.888889	0.277778
Nop56p-associated pre-rRNA complex	RPS13	15	9	1.66667	0.406504	35	9	3.88889	1.25448	30	9	3.33333	1.04167
Nop56p-associated pre-rRNA complex	RPS14	8	5	1.6	0.390244	10.5	5	2.1	0.677419	5.5	5	1.1	0.34375
Nop56p-associated pre-rRNA complex	RPS15	9	6	1.5	0.365854	14	6	2.33333	0.752688	7	6	1.16667	0.364583
Nop56p-associated pre-rRNA complex	RPS15A	8.5	8	1.0625	0.259146	12.5	8	1.5625	0.504032	2.5	8	0.3125	0.0976562
Nop56p-associated pre-rRNA complex	RPS16	8	10	0.8	0.195122	21.5	10	2.15	0.693548	7	10	0.7	0.21875
Nop56p-associated pre-rRNA complex	RPS18	9	11	0.818182	0.199557	10.5	11	0.954545	0.307918	4	11	0.363636	0.113636
Nop56p-associated pre-rRNA complex	RPS2	14	16	0.875	0.213415	30	16	1.875	0.604839	10.5	16	0.65625	0.205078
Nop56p-associated pre-rRNA complex	RPS23	3.5	6	0.583333	0.142276	4.5	6	0.75	0.241935	5.5	6	0.916667	0.286458
Nop56p-associated pre-rRNA complex	RPS24	7	4	1.75	0.426829	14.5	4	3.625	1.16935	10.5	4	2.625	0.820312
Nop56p-associated pre-rRNA complex	RPS3A	23.5	17	1.38235	0.337159	34.5	17	2.02941	0.654649	22.5	17	1.32353	0.413603
Nop56p-associated pre-rRNA complex	RPS6	16.5	8	2.0625	0.503049	31.5	8	3.9375	1.27016	17	8	2.125	0.664062
Nop56p-associated pre-rRNA complex	RPS7	19	11	1.72727	0.421286	28	11	2.54545	0.821114	2	11	0.181818	0.0568182
Nop56p-associated pre-rRNA complex	RPS8	15.5	10	1.55	0.378049	20	10	2	0.645161	17.5	10	1.75	0.546875
Nop56p-associated pre-rRNA complex	RPS9	11	11	1	0.243902	24.5	11	2.22727	0.718475	23.5	11	2.13636	0.667614
Nop56p-associated pre-rRNA complex	RSL1D1	61.5	23	2.67391	0.652174	22	23	0.956522	0.308555	50.5	23	2.19565	0.686141
Nop56p-associated pre-rRNA complex	SLC25A5	0		0	0	0		0	0	2	19	0.105263	0.0328947
Nop56p-associated pre-rRNA complex	SRP14	5	6	0.833333	0.203252	0		0	0	0		0	0
Nop56p-associated pre-rRNA complex	SRPK1	5.5	31	0.177419	0.043273	7	31	0.225806	0.0728408	0		0	0
Nop56p-associated pre-rRNA complex	TCOF1	15.5	63	0.246032	0.0600077	0		0	0	0		0	0
Nop56p-associated pre-rRNA complex	TOP1	0		0	0	0		0	0	2	42	0.047619	0.014881
Nop56p-associated pre-rRNA complex	TUFM	5	31	0.16129	0.0393391	3.5	31	0.112903	0.0364204	0		0	0
		p-value	total (T)	query (Q)	T&Q	p-value	total (T)	query (Q)	T&Q	p-value	total (T)	query (Q)	T&Q
Corum complex ID: 3055		1.78e-54	104	324	82	2.81e-51	104	279	76	1.11e-57	104	236	76
Complex	Prey in complex	avg TSC	in silico pept/prot	avg TSC/in silico pept	(prey avg TSC/in silico pept) / (Nol12 avg TSC/in silico pept)	avg TSC	in silico pept/prot	avg TSC/in silico pept	(prey avg TSC/in silico pept) / (Nol12 avg TSC/in silico pept)	avg TSC	in silico pept/prot	avg TSC/in silico pept	(prey avg TSC/in silico pept) / (Nol12 avg TSC/in silico pept)
Ribosome, cytoplasmic	FAU	3	3	1	0.243902	3	3	1	0.322581	0		0	0
Ribosome, cytoplasmic	RPL10	8	8	1	0.243902	11	8	1.375	0.443548	10.5	8	1.3125	0.410156
Ribosome, cytoplasmic	RPL10A	17.5	13	1.34615	0.32833	9	13	0.692308	0.223325	14	13	1.07692	0.336538
Ribosome, cytoplasmic	RPL11	4.5	8	0.5625	0.137195	7	8	0.875	0.282258	4.5	8	0.5625	0.175781
Ribosome, cytoplasmic	RPL12	12	7	1.71429	0.418118	14.5	7	2.07143	0.668203	13	7	1.85714	0.580357
Ribosome, cytoplasmic	RPL13	22	11	2	0.487805	38	11	3.45455	1.11437	36.5	11	3.31818	1.03693
Ribosome, cytoplasmic	RPL13A	15	10	1.5	0.365854	32.5	10	3.25	1.04839	41.5	10	4.15	1.29688
Ribosome, cytoplasmic	RPL14	7	7	1	0.243902	10.5	7	1.5	0.483871	10	7	1.42857	0.446429
Ribosome, cytoplasmic	RPL15	14	12	1.16667	0.284553	19.5	12	1.625	0.524194	18	12	1.5	0.46875
Ribosome, cytoplasmic	RPL17	19.5	8	2.4375	0.594512	34	8	4.25	1.37097	40	8	5	1.5625
Ribosome, cytoplasmic	RPL18	10.5	7	1.5	0.365854	13.5	7	1.92857	0.62212	17.5	7	2.5	0.78125
Ribosome, cytoplasmic	RPL18A	10	12	0.833333	0.203252	8.5	12	0.708333	0.228495	12.5	12	1.04167	0.325521
Ribosome, cytoplasmic	RPL19	8	5	1.6	0.390244	6.5	5	1.3	0.419355	11	5	2.2	0.6875
Ribosome, cytoplasmic	RPL21	11	7	1.57143	0.383275	20	7	2.85714	0.921659	19	7	2.71429	0.848214
Ribosome, cytoplasmic	RPL22	5.5	5	1.1	0.268293	4	5	0.8	0.258065	2.5	5	0.5	0.15625
Ribosome, cytoplasmic	RPL23	9.5	8	1.1875	0.289634	24	8	3	0.967742	6	8	0.75	0.234375
Ribosome, cytoplasmic	RPL23A	12.5	6	2.08333	0.50813	25	6	4.16667	1.34409	16	6	2.66667	0.833333
Ribosome, cytoplasmic	RPL24	4	8	0.5	0.121951	7	8	0.875	0.282258	3	8	0.375	0.117188
Ribosome, cytoplasmic	RPL26	12	7	1.71429	0.418118	12.5	7	1.78571	0.576037	12.5	7	1.78571	0.558036
Ribosome, cytoplasmic	RPL27	5.5	5	1.1	0.268293	14.5	5	2.9	0.935484	8	5	1.6	0.5
Ribosome, cytoplasmic	RPL27A	5	7	0.714286	0.174216	6.5	7	0.928571	0.299539	6.5	7	0.928571	0.290179
Ribosome, cytoplasmic	RPL28	18.5	8	2.3125	0.564024	13	8	1.625	0.524194	22	8	2.75	0.859375
Ribosome, cytoplasmic	RPL29	3	4	0.75	0.182927	4	4	1	0.322581	3.5	4	0.875	0.273438
Ribosome, cytoplasmic	RPL3	37.5	19	1.97368	0.481386	44	19	2.31579	0.747029	35.5	19	1.86842	0.583882
Ribosome, cytoplasmic	RPL30	10.5	6	1.75	0.426829	13	6	2.16667	0.698925	11.5	6	1.91667	0.598958
Ribosome, cytoplasmic	RPL31	5.5	7	0.785714	0.191638	11.5	7	1.64286	0.529954	6	7	0.857143	0.267857
Ribosome, cytoplasmic	RPL32	11.5	7	1.64286	0.400697	17.5	7	2.5	0.806452	23.5	7	3.35714	1.04911
Ribosome, cytoplasmic	RPL34	9.5	6	1.58333	0.386179	3	6	0.5	0.16129	4.5	6	0.75	0.234375
Ribosome, cytoplasmic	RPL35	6.5	4	1.625	0.396341	8	4	2	0.645161	6.5	4	1.625	0.507812
Ribosome, cytoplasmic	RPL35A	9	7	1.28571	0.313589	11.5	7	1.64286	0.529954	18.5	7	2.64286	0.825893
Ribosome, cytoplasmic	RPL36	5.5	3	1.83333	0.447154	9.5	3	3.16667	1.02151	8.5	3	2.83333	0.885417
Ribosome, cytoplasmic	RPL37									2	4	0.5	0.15625
Ribosome, cytoplasmic	RPL37A	4	4	1	0.243902	17	4	4.25	1.37097	17	4	4.25	1.32812
Ribosome, cytoplasmic	RPL38	6.5	3	2.16667	0.528455	8	3	2.66667	0.860215	4	3	1.33333	0.416667
Ribosome, cytoplasmic	RPL4	22	17	1.29412	0.315638	31.5	17	1.85294	0.597723	40	17	2.35294	0.735294
Ribosome, cytoplasmic	RPL5	23.5	13	1.80769	0.440901	16	13	1.23077	0.397022	17	13	1.30769	0.408654
Ribosome, cytoplasmic	RPL6	30.5	15	2.03333	0.495935	33	15	2.2	0.709677	44	15	2.93333	0.916667
Ribosome, cytoplasmic	RPL7	20	13	1.53846	0.375235	26	13	2	0.645161	31.5	13	2.42308	0.757212
Ribosome, cytoplasmic	RPL7A	16.5	12	1.375	0.335366	18.5	12	1.54167	0.497312	23.5	12	1.95833	0.611979
Ribosome, cytoplasmic	RPL8	10.5	8	1.3125	0.320122	16	8	2	0.645161	21	8	2.625	0.820312
Ribosome, cytoplasmic	RPL9	11.5	8	1.4375	0.35061	20	8	2.5	0.806452	8	8	1	0.3125
Ribosome, cytoplasmic	RPLP0	17	16	1.0625	0.259146	27	16	1.6875	0.544355	23.5	16	1.46875	0.458984
Ribosome, cytoplasmic	RPLP2	12	6	2	0.487805	14	6	2.33333	0.752688	14.5	6	2.41667	0.755208
Ribosome, cytoplasmic	RPS10	7.5	10	0.75	0.182927	33	10	3.3	1.06452	0		0	0
Ribosome, cytoplasmic	RPS11	6	9	0.666667	0.162602	9	9	1	0.322581	8	9	0.888889	0.277778
Ribosome, cytoplasmic	RPS13	15	9	1.66667	0.406504	35	9	3.88889	1.25448	30	9	3.33333	1.04167
Ribosome, cytoplasmic	RPS14	8	5	1.6	0.390244	10.5	5	2.1	0.677419	5.5	5	1.1	0.34375
Ribosome, cytoplasmic	RPS15	9	6	1.5	0.365854	14	6	2.33333	0.752688	7	6	1.16667	0.364583
Ribosome, cytoplasmic	RPS15A	8.5	8	1.0625	0.259146	12.5	8	1.5625	0.504032	2.5	8	0.3125	0.0976562
Ribosome, cytoplasmic	RPS16	8	10	0.8	0.195122	21.5	10	2.15	0.693548	7	10	0.7	0.21875
Ribosome, cytoplasmic	RPS18	9	11	0.818182	0.199557	10.5	11	0.954545	0.307918	4	11	0.363636	0.113636
Ribosome, cytoplasmic	RPS19	18.5	8	2.3125	0.564024	17.5	8	2.1875	0.705645	0		0	0
Ribosome, cytoplasmic	RPS2	14	16	0.875	0.213415	30	16	1.875	0.604839	10.5	16	0.65625	0.205078
Ribosome, cytoplasmic	RPS20	5.5	5	1.1	0.268293	4	5	0.8	0.258065	0		0	0
Ribosome, cytoplasmic	RPS23	3.5	6	0.583333	0.142276	4.5	6	0.75	0.241935	5.5	6	0.916667	0.286458
Ribosome, cytoplasmic	RPS24	7	4	1.75	0.426829	14.5	4	3.625	1.16935	10.5	4	2.625	0.820312
Ribosome, cytoplasmic	RPS25	6	5	1.2	0.292683	4	5	0.8	0.258065	5	5	1	0.3125
Ribosome, cytoplasmic	RPS26	5.5	5	1.1	0.268293	12.5	5	2.5	0.806452	10	5	2	0.625
Ribosome, cytoplasmic	RPS27	0		0	0	5.5	4	1.375	0.443548	0		0	0
Ribosome, cytoplasmic	RPS3	8	18	0.444444	0.108401	27.5	18	1.52778	0.492832	4	18	0.222222	0.0694444
Ribosome, cytoplasmic	RPS3A	23.5	17	1.38235	0.337159	34.5	17	2.02941	0.654649	22.5	17	1.32353	0.413603
Ribosome, cytoplasmic	RPS4X	26	17	1.52941	0.373027	29.5	17	1.73529	0.559772	15.5	17	0.911765	0.284926
Ribosome, cytoplasmic	RPS5	14.5	10	1.45	0.353659	14	10	1.4	0.451613	0		0	0
Ribosome, cytoplasmic	RPS6	16.5	8	2.0625	0.503049	31.5	8	3.9375	1.27016	17	8	2.125	0.664062
Ribosome, cytoplasmic	RPS7	19	11	1.72727	0.421286	28	11	2.54545	0.821114	2	11	0.181818	0.0568182
Ribosome, cytoplasmic	RPS8	15.5	10	1.55	0.378049	20	10	2	0.645161	17.5	10	1.75	0.546875
Ribosome, cytoplasmic	RPS9	11	11	1	0.243902	24.5	11	2.22727	0.718475	23.5	11	2.13636	0.667614
Ribosome, cytoplasmic	RPSA	0		0	0	2	14	0.142857	0.0460829	3.5	14	0.25	0.078125
		p-value	total (T)	query (Q)	T&Q	p-value	total (T)	query (Q)	T&Q	p-value	total (T)	query (Q)	T&Q
Corum complex ID: 306		1.54e-44	79	324	65	1.32e-52	79	279	67	1.94e-49	79	236	62
Complex	Prey in complex	avg TSC	in silico pept/prot	avg TSC/in silico pept	(prey avg TSC/in silico pept) / (Nol12 avg TSC/in silico pept)	avg TSC	in silico pept/prot	avg TSC/in silico pept	(prey avg TSC/in silico pept) / (Nol12 avg TSC/in silico pept)	avg TSC	in silico pept/prot	avg TSC/in silico pept	(prey avg TSC/in silico pept) / (Nol12 avg TSC/in silico pept)
60S ribosomal subunit, cytoplasmic	RPL10	8	8	1	0.243902	11	8	1.375	0.443548	10.5	8	1.3125	0.410156
60S ribosomal subunit, cytoplasmic	RPL10A	17.5	13	1.34615	0.32833	9	13	0.692308	0.223325	14	13	1.07692	0.336538
60S ribosomal subunit, cytoplasmic	RPL11	4.5	8	0.5625	0.137195	7	8	0.875	0.282258	4.5	8	0.5625	0.175781
60S ribosomal subunit, cytoplasmic	RPL12	12	7	1.71429	0.418118	14.5	7	2.07143	0.668203	13	7	1.85714	0.580357
60S ribosomal subunit, cytoplasmic	RPL13	22	11	2	0.487805	38	11	3.45455	1.11437	36.5	11	3.31818	1.03693
60S ribosomal subunit, cytoplasmic	RPL13A	15	10	1.5	0.365854	32.5	10	3.25	1.04839	41.5	10	4.15	1.29688
60S ribosomal subunit, cytoplasmic	RPL14	7	7	1	0.243902	10.5	7	1.5	0.483871	10	7	1.42857	0.446429
60S ribosomal subunit, cytoplasmic	RPL15	14	12	1.16667	0.284553	19.5	12	1.625	0.524194	18	12	1.5	0.46875
60S ribosomal subunit, cytoplasmic	RPL17	19.5	8	2.4375	0.594512	34	8	4.25	1.37097	40	8	5	1.5625
60S ribosomal subunit, cytoplasmic	RPL18	10.5	7	1.5	0.365854	13.5	7	1.92857	0.62212	17.5	7	2.5	0.78125
60S ribosomal subunit, cytoplasmic	RPL18A	10	12	0.833333	0.203252	8.5	12	0.708333	0.228495	12.5	12	1.04167	0.325521
60S ribosomal subunit, cytoplasmic	RPL19	8	5	1.6	0.390244	6.5	5	1.3	0.419355	11	5	2.2	0.6875
60S ribosomal subunit, cytoplasmic	RPL21	11	7	1.57143	0.383275	20	7	2.85714	0.921659	19	7	2.71429	0.848214
60S ribosomal subunit, cytoplasmic	RPL22	5.5	5	1.1	0.268293	4	5	0.8	0.258065	2.5	5	0.5	0.15625
60S ribosomal subunit, cytoplasmic	RPL23	9.5	8	1.1875	0.289634	24	8	3	0.967742	6	8	0.75	0.234375
60S ribosomal subunit, cytoplasmic	RPL23A	12.5	6	2.08333	0.50813	25	6	4.16667	1.34409	16	6	2.66667	0.833333
60S ribosomal subunit, cytoplasmic	RPL24	4	8	0.5	0.121951	7	8	0.875	0.282258	3	8	0.375	0.117188
60S ribosomal subunit, cytoplasmic	RPL26	12	7	1.71429	0.418118	12.5	7	1.78571	0.576037	12.5	7	1.78571	0.558036
60S ribosomal subunit, cytoplasmic	RPL27	5.5	5	1.1	0.268293	14.5	5	2.9	0.935484	8	5	1.6	0.5
60S ribosomal subunit, cytoplasmic	RPL27A	5	7	0.714286	0.174216	6.5	7	0.928571	0.299539	6.5	7	0.928571	0.290179
60S ribosomal subunit, cytoplasmic	RPL28	18.5	8	2.3125	0.564024	13	8	1.625	0.524194	22	8	2.75	0.859375
60S ribosomal subunit, cytoplasmic	RPL29	3	4	0.75	0.182927	4	4	1	0.322581	3.5	4	0.875	0.273438
60S ribosomal subunit, cytoplasmic	RPL3	37.5	19	1.97368	0.481386	44	19	2.31579	0.747029	35.5	19	1.86842	0.583882
60S ribosomal subunit, cytoplasmic	RPL30	10.5	6	1.75	0.426829	13	6	2.16667	0.698925	11.5	6	1.91667	0.598958
60S ribosomal subunit, cytoplasmic	RPL31	5.5	7	0.785714	0.191638	11.5	7	1.64286	0.529954	6	7	0.857143	0.267857
60S ribosomal subunit, cytoplasmic	RPL32	11.5	7	1.64286	0.400697	17.5	7	2.5	0.806452	23.5	7	3.35714	1.04911
60S ribosomal subunit, cytoplasmic	RPL34	9.5	6	1.58333	0.386179	3	6	0.5	0.16129	4.5	6	0.75	0.234375
60S ribosomal subunit, cytoplasmic	RPL35	6.5	4	1.625	0.396341	8	4	2	0.645161	6.5	4	1.625	0.507812
60S ribosomal subunit, cytoplasmic	RPL35A	9	7	1.28571	0.313589	11.5	7	1.64286	0.529954	18.5	7	2.64286	0.825893
60S ribosomal subunit, cytoplasmic	RPL36	5.5	3	1.83333	0.447154	9.5	3	3.16667	1.02151	8.5	3	2.83333	0.885417
60S ribosomal subunit, cytoplasmic	RPL37									2	4	0.5	0.15625
60S ribosomal subunit, cytoplasmic	RPL37A	4	4	1	0.243902	17	4	4.25	1.37097	17	4	4.25	1.32812
60S ribosomal subunit, cytoplasmic	RPL38	6.5	3	2.16667	0.528455	8	3	2.66667	0.860215	4	3	1.33333	0.416667
60S ribosomal subunit, cytoplasmic	RPL4	22	17	1.29412	0.315638	31.5	17	1.85294	0.597723	40	17	2.35294	0.735294
60S ribosomal subunit, cytoplasmic	RPL5	23.5	13	1.80769	0.440901	16	13	1.23077	0.397022	17	13	1.30769	0.408654
60S ribosomal subunit, cytoplasmic	RPL6	30.5	15	2.03333	0.495935	33	15	2.2	0.709677	44	15	2.93333	0.916667
60S ribosomal subunit, cytoplasmic	RPL7	20	13	1.53846	0.375235	26	13	2	0.645161	31.5	13	2.42308	0.757212
60S ribosomal subunit, cytoplasmic	RPL7A	16.5	12	1.375	0.335366	18.5	12	1.54167	0.497312	23.5	12	1.95833	0.611979
60S ribosomal subunit, cytoplasmic	RPL8	10.5	8	1.3125	0.320122	16	8	2	0.645161	21	8	2.625	0.820312
60S ribosomal subunit, cytoplasmic	RPL9	11.5	8	1.4375	0.35061	20	8	2.5	0.806452	8	8	1	0.3125
60S ribosomal subunit, cytoplasmic	RPLP0	17	16	1.0625	0.259146	27	16	1.6875	0.544355	23.5	16	1.46875	0.458984
60S ribosomal subunit, cytoplasmic	RPLP2	12	6	2	0.487805	14	6	2.33333	0.752688	14.5	6	2.41667	0.755208
		p-value	total (T)	query (Q)	T&Q	p-value	total (T)	query (Q)	T&Q	p-value	total (T)	query (Q)	T&Q
Corum complex ID: 308		3.01e-29	47	324	41	4.52e-32	47	279	41	2.86e-37	47	236	42
Complex	Prey in complex	avg TSC	in silico pept/prot	avg TSC/in silico pept	(prey avg TSC/in silico pept) / (Nol12 avg TSC/in silico pept)	avg TSC	in silico pept/prot	avg TSC/in silico pept	(prey avg TSC/in silico pept) / (Nol12 avg TSC/in silico pept)	avg TSC	in silico pept/prot	avg TSC/in silico pept	(prey avg TSC/in silico pept) / (Nol12 avg TSC/in silico pept)
TRBP containing complex (DICER, RPL7A, EIF6, MOV10 and subunits of the 60S ribosomal particle)	EIF6	7.5	11	0.681818	0.166297	6.5	11	0.590909	0.190616	12	11	1.09091	0.340909
TRBP containing complex (DICER, RPL7A, EIF6, MOV10 and subunits of the 60S ribosomal particle)	MOV10	0		0	0	2.5	55	0.0454545	0.0146628	4.5	55	0.0818182	0.0255682
TRBP containing complex (DICER, RPL7A, EIF6, MOV10 and subunits of the 60S ribosomal particle)	RPL10A	17.5	13	1.34615	0.32833	9	13	0.692308	0.223325	14	13	1.07692	0.336538
TRBP containing complex (DICER, RPL7A, EIF6, MOV10 and subunits of the 60S ribosomal particle)	RPL11	4.5	8	0.5625	0.137195	7	8	0.875	0.282258	4.5	8	0.5625	0.175781
TRBP containing complex (DICER, RPL7A, EIF6, MOV10 and subunits of the 60S ribosomal particle)	RPL12	12	7	1.71429	0.418118	14.5	7	2.07143	0.668203	13	7	1.85714	0.580357
TRBP containing complex (DICER, RPL7A, EIF6, MOV10 and subunits of the 60S ribosomal particle)	RPL13	22	11	2	0.487805	38	11	3.45455	1.11437	36.5	11	3.31818	1.03693
TRBP containing complex (DICER, RPL7A, EIF6, MOV10 and subunits of the 60S ribosomal particle)	RPL14	7	7	1	0.243902	10.5	7	1.5	0.483871	10	7	1.42857	0.446429
TRBP containing complex (DICER, RPL7A, EIF6, MOV10 and subunits of the 60S ribosomal particle)	RPL15	14	12	1.16667	0.284553	19.5	12	1.625	0.524194	18	12	1.5	0.46875
TRBP containing complex (DICER, RPL7A, EIF6, MOV10 and subunits of the 60S ribosomal particle)	RPL18A	10	12	0.833333	0.203252	8.5	12	0.708333	0.228495	12.5	12	1.04167	0.325521
TRBP containing complex (DICER, RPL7A, EIF6, MOV10 and subunits of the 60S ribosomal particle)	RPL19	8	5	1.6	0.390244	6.5	5	1.3	0.419355	11	5	2.2	0.6875
TRBP containing complex (DICER, RPL7A, EIF6, MOV10 and subunits of the 60S ribosomal particle)	RPL21	11	7	1.57143	0.383275	20	7	2.85714	0.921659	19	7	2.71429	0.848214
TRBP containing complex (DICER, RPL7A, EIF6, MOV10 and subunits of the 60S ribosomal particle)	RPL27	5.5	5	1.1	0.268293	14.5	5	2.9	0.935484	8	5	1.6	0.5
TRBP containing complex (DICER, RPL7A, EIF6, MOV10 and subunits of the 60S ribosomal particle)	RPL28	18.5	8	2.3125	0.564024	13	8	1.625	0.524194	22	8	2.75	0.859375
TRBP containing complex (DICER, RPL7A, EIF6, MOV10 and subunits of the 60S ribosomal particle)	RPL30	10.5	6	1.75	0.426829	13	6	2.16667	0.698925	11.5	6	1.91667	0.598958
TRBP containing complex (DICER, RPL7A, EIF6, MOV10 and subunits of the 60S ribosomal particle)	RPL32	11.5	7	1.64286	0.400697	17.5	7	2.5	0.806452	23.5	7	3.35714	1.04911
TRBP containing complex (DICER, RPL7A, EIF6, MOV10 and subunits of the 60S ribosomal particle)	RPL34	9.5	6	1.58333	0.386179	3	6	0.5	0.16129	4.5	6	0.75	0.234375
TRBP containing complex (DICER, RPL7A, EIF6, MOV10 and subunits of the 60S ribosomal particle)	RPL35A	9	7	1.28571	0.313589	11.5	7	1.64286	0.529954	18.5	7	2.64286	0.825893
TRBP containing complex (DICER, RPL7A, EIF6, MOV10 and subunits of the 60S ribosomal particle)	RPL36	5.5	3	1.83333	0.447154	9.5	3	3.16667	1.02151	8.5	3	2.83333	0.885417
TRBP containing complex (DICER, RPL7A, EIF6, MOV10 and subunits of the 60S ribosomal particle)	RPL37A	4	4	1	0.243902	17	4	4.25	1.37097	17	4	4.25	1.32812
TRBP containing complex (DICER, RPL7A, EIF6, MOV10 and subunits of the 60S ribosomal particle)	RPL7	20	13	1.53846	0.375235	26	13	2	0.645161	31.5	13	2.42308	0.757212
TRBP containing complex (DICER, RPL7A, EIF6, MOV10 and subunits of the 60S ribosomal particle)	RPL7A	16.5	12	1.375	0.335366	18.5	12	1.54167	0.497312	23.5	12	1.95833	0.611979
TRBP containing complex (DICER, RPL7A, EIF6, MOV10 and subunits of the 60S ribosomal particle)	RPLP2	12	6	2	0.487805	14	6	2.33333	0.752688	14.5	6	2.41667	0.755208
TRBP containing complex (DICER, RPL7A, EIF6, MOV10 and subunits of the 60S ribosomal particle)	RSL24D1	5.5	4	1.375	0.335366	0		0	0	7.5	4	1.875	0.585938
		p-value	total (T)	query (Q)	T&Q	p-value	total (T)	query (Q)	T&Q	p-value	total (T)	query (Q)	T&Q
Corum complex ID: 5380		4.01e-15	25	324	22	1.35e-16	25	279	22	3e-20	25	236	23
Complex	Prey in complex	avg TSC	in silico pept/prot	avg TSC/in silico pept	(prey avg TSC/in silico pept) / (Nol12 avg TSC/in silico pept)	avg TSC	in silico pept/prot	avg TSC/in silico pept	(prey avg TSC/in silico pept) / (Nol12 avg TSC/in silico pept)	avg TSC	in silico pept/prot	avg TSC/in silico pept	(prey avg TSC/in silico pept) / (Nol12 avg TSC/in silico pept)
40S ribosomal subunit, cytoplasmic	FAU	3	3	1	0.243902	3	3	1	0.322581	0		0	0
40S ribosomal subunit, cytoplasmic	RPS10	7.5	10	0.75	0.182927	33	10	3.3	1.06452	0		0	0
40S ribosomal subunit, cytoplasmic	RPS11	6	9	0.666667	0.162602	9	9	1	0.322581	8	9	0.888889	0.277778
40S ribosomal subunit, cytoplasmic	RPS13	15	9	1.66667	0.406504	35	9	3.88889	1.25448	30	9	3.33333	1.04167
40S ribosomal subunit, cytoplasmic	RPS14	8	5	1.6	0.390244	10.5	5	2.1	0.677419	5.5	5	1.1	0.34375
40S ribosomal subunit, cytoplasmic	RPS15	9	6	1.5	0.365854	14	6	2.33333	0.752688	7	6	1.16667	0.364583
40S ribosomal subunit, cytoplasmic	RPS15A	8.5	8	1.0625	0.259146	12.5	8	1.5625	0.504032	2.5	8	0.3125	0.0976562
40S ribosomal subunit, cytoplasmic	RPS16	8	10	0.8	0.195122	21.5	10	2.15	0.693548	7	10	0.7	0.21875
40S ribosomal subunit, cytoplasmic	RPS18	9	11	0.818182	0.199557	10.5	11	0.954545	0.307918	4	11	0.363636	0.113636
40S ribosomal subunit, cytoplasmic	RPS19	18.5	8	2.3125	0.564024	17.5	8	2.1875	0.705645	0		0	0
40S ribosomal subunit, cytoplasmic	RPS2	14	16	0.875	0.213415	30	16	1.875	0.604839	10.5	16	0.65625	0.205078
40S ribosomal subunit, cytoplasmic	RPS20	5.5	5	1.1	0.268293	4	5	0.8	0.258065	0		0	0
40S ribosomal subunit, cytoplasmic	RPS23	3.5	6	0.583333	0.142276	4.5	6	0.75	0.241935	5.5	6	0.916667	0.286458
40S ribosomal subunit, cytoplasmic	RPS24	7	4	1.75	0.426829	14.5	4	3.625	1.16935	10.5	4	2.625	0.820312
40S ribosomal subunit, cytoplasmic	RPS25	6	5	1.2	0.292683	4	5	0.8	0.258065	5	5	1	0.3125
40S ribosomal subunit, cytoplasmic	RPS26	5.5	5	1.1	0.268293	12.5	5	2.5	0.806452	10	5	2	0.625
40S ribosomal subunit, cytoplasmic	RPS27	0		0	0	5.5	4	1.375	0.443548	0		0	0
40S ribosomal subunit, cytoplasmic	RPS3	8	18	0.444444	0.108401	27.5	18	1.52778	0.492832	4	18	0.222222	0.0694444
40S ribosomal subunit, cytoplasmic	RPS3A	23.5	17	1.38235	0.337159	34.5	17	2.02941	0.654649	22.5	17	1.32353	0.413603
40S ribosomal subunit, cytoplasmic	RPS4X	26	17	1.52941	0.373027	29.5	17	1.73529	0.559772	15.5	17	0.911765	0.284926
40S ribosomal subunit, cytoplasmic	RPS5	14.5	10	1.45	0.353659	14	10	1.4	0.451613	0		0	0
40S ribosomal subunit, cytoplasmic	RPS6	16.5	8	2.0625	0.503049	31.5	8	3.9375	1.27016	17	8	2.125	0.664062
40S ribosomal subunit, cytoplasmic	RPS7	19	11	1.72727	0.421286	28	11	2.54545	0.821114	2	11	0.181818	0.0568182
40S ribosomal subunit, cytoplasmic	RPS8	15.5	10	1.55	0.378049	20	10	2	0.645161	17.5	10	1.75	0.546875
40S ribosomal subunit, cytoplasmic	RPS9	11	11	1	0.243902	24.5	11	2.22727	0.718475	23.5	11	2.13636	0.667614
40S ribosomal subunit, cytoplasmic	RPSA	0		0	0	2	14	0.142857	0.0460829	3.5	14	0.25	0.078125
		p-value	total (T)	query (Q)	T&Q	p-value	total (T)	query (Q)	T&Q	p-value	total (T)	query (Q)	T&Q
Corum complex ID: 338		1.45e-13	32	324	24	4.31e-18	32	279	26	1.49e-11	32	236	20
Complex	Prey in complex	avg TSC	in silico pept/prot	avg TSC/in silico pept	(prey avg TSC/in silico pept) / (Nol12 avg TSC/in silico pept)	avg TSC	in silico pept/prot	avg TSC/in silico pept	(prey avg TSC/in silico pept) / (Nol12 avg TSC/in silico pept)	avg TSC	in silico pept/prot	avg TSC/in silico pept	(prey avg TSC/in silico pept) / (Nol12 avg TSC/in silico pept)
28S ribosomal subunit, mitochondrial	DAP3	10.5	23	0.456522	0.111347	6.5	23	0.282609	0.0911641	7	23	0.304348	0.0951087
28S ribosomal subunit, mitochondrial	MRPS10	6.5	13	0.5	0.121951	0		0	0	3.5	13	0.269231	0.0841346
28S ribosomal subunit, mitochondrial	MRPS11	5.5	9	0.611111	0.149051	0		0	0	0		0	0
28S ribosomal subunit, mitochondrial	MRPS14	3	7	0.428571	0.10453	0		0	0	0		0	0
28S ribosomal subunit, mitochondrial	MRPS15	6	13	0.461538	0.11257	3	13	0.230769	0.0744417	3.5	13	0.269231	0.0841346
28S ribosomal subunit, mitochondrial	MRPS16	0		0	0	0		0	0	2	10	0.2	0.0625
28S ribosomal subunit, mitochondrial	MRPS17	0		0	0	2	5	0.4	0.129032	0		0	0
28S ribosomal subunit, mitochondrial	MRPS18B	4.5	14	0.321429	0.0783972	3.5	14	0.25	0.0806452	3.5	14	0.25	0.078125
28S ribosomal subunit, mitochondrial	MRPS2	7.5	20	0.375	0.0914634	3.5	20	0.175	0.0564516	4.5	20	0.225	0.0703125
28S ribosomal subunit, mitochondrial	MRPS22	16.5	23	0.717391	0.174973	7.5	23	0.326087	0.105189	10.5	23	0.456522	0.142663
28S ribosomal subunit, mitochondrial	MRPS23	5.5	13	0.423077	0.103189	2.5	13	0.192308	0.0620347	2.5	13	0.192308	0.0600962
28S ribosomal subunit, mitochondrial	MRPS25	2	11	0.181818	0.0443459	2	11	0.181818	0.058651	2.5	11	0.227273	0.0710227
28S ribosomal subunit, mitochondrial	MRPS26	9	12	0.75	0.182927	6	12	0.5	0.16129	4	12	0.333333	0.104167
28S ribosomal subunit, mitochondrial	MRPS27	10	25	0.4	0.097561	6	25	0.24	0.0774194	7	25	0.28	0.0875
28S ribosomal subunit, mitochondrial	MRPS28	9	13	0.692308	0.168856	0		0	0	0		0	0
28S ribosomal subunit, mitochondrial	MRPS31	18.5	23	0.804348	0.196182	7.5	23	0.326087	0.105189	8	23	0.347826	0.108696
28S ribosomal subunit, mitochondrial	MRPS34	11	13	0.846154	0.206379	6.5	13	0.5	0.16129	5	13	0.384615	0.120192
28S ribosomal subunit, mitochondrial	MRPS35	11.5	16	0.71875	0.175305	4.5	16	0.28125	0.0907258	3.5	16	0.21875	0.0683594
28S ribosomal subunit, mitochondrial	MRPS5	9.5	25	0.38	0.0926829	0		0	0	2.5	25	0.1	0.03125
28S ribosomal subunit, mitochondrial	MRPS6	2	8	0.25	0.0609756	0		0	0	0		0	0
28S ribosomal subunit, mitochondrial	MRPS7	10	13	0.769231	0.187617	3	13	0.230769	0.0744417	2.5	13	0.192308	0.0600962
28S ribosomal subunit, mitochondrial	MRPS9	7.5	25	0.3	0.0731707	4	25	0.16	0.0516129	4.5	25	0.18	0.05625
		p-value	total (T)	query (Q)	T&Q	p-value	total (T)	query (Q)	T&Q	p-value	total (T)	query (Q)	T&Q
Corum complex ID: 315		5.64e-10	29	324	20	1.07e-05	29	279	15	5.15e-09	29	236	17
Complex	Prey in complex	avg TSC	in silico pept/prot	avg TSC/in silico pept	(prey avg TSC/in silico pept) / (Nol12 avg TSC/in silico pept)	avg TSC	in silico pept/prot	avg TSC/in silico pept	(prey avg TSC/in silico pept) / (Nol12 avg TSC/in silico pept)	avg TSC	in silico pept/prot	avg TSC/in silico pept	(prey avg TSC/in silico pept) / (Nol12 avg TSC/in silico pept)
Multisynthetase complex	AIMP1	4.5	18	0.25	0.0609756	2.5	18	0.138889	0.0448029	0		0	0
Multisynthetase complex	AIMP2	2	18	0.111111	0.0271003	0		0	0	0		0	0
Multisynthetase complex	DARS	11.5	37	0.310811	0.0758075	7	37	0.189189	0.0610288	0		0	0
Multisynthetase complex	EEF1E1	2	13	0.153846	0.0375235	2.5	13	0.192308	0.0620347	0		0	0
Multisynthetase complex	EPRS	29.5	80	0.36875	0.089939	13	80	0.1625	0.0524194	0		0	0
Multisynthetase complex	IARS	12	64	0.1875	0.0457317	9	64	0.140625	0.0453629	3.5	64	0.0546875	0.0170898
Multisynthetase complex	KARS	8.5	32	0.265625	0.0647866	5	32	0.15625	0.0504032	0		0	0
Multisynthetase complex	LARS	14.5	63	0.230159	0.0561363	12	63	0.190476	0.0614439	0		0	0
Multisynthetase complex	MARS	9	40	0.225	0.054878	5	40	0.125	0.0403226	3.5	40	0.0875	0.0273437
Multisynthetase complex	QARS	12	51	0.235294	0.0573888	8	51	0.156863	0.0506009	0		0	0
Multisynthetase complex	RARS	10	39	0.25641	0.0625391	5	39	0.128205	0.0413565	2.5	39	0.0641026	0.0200321
		p-value	total (T)	query (Q)	T&Q	p-value	total (T)	query (Q)	T&Q	p-value	total (T)	query (Q)	T&Q
Corum complex ID: 3040		2.55e-08	11	324	11	4.26e-07	11	279	10	1	11	236	3
Complex	Prey in complex	avg TSC	in silico pept/prot	avg TSC/in silico pept	(prey avg TSC/in silico pept) / (Nol12 avg TSC/in silico pept)	avg TSC	in silico pept/prot	avg TSC/in silico pept	(prey avg TSC/in silico pept) / (Nol12 avg TSC/in silico pept)	avg TSC	in silico pept/prot	avg TSC/in silico pept	(prey avg TSC/in silico pept) / (Nol12 avg TSC/in silico pept)
SNW1 complex	ABCF2	2	35	0.0571429	0.0139373	10	35	0.285714	0.0921659	0		0	0
SNW1 complex	CDC5L	7.5	37	0.202703	0.0494397	0		0	0	6	37	0.162162	0.0506757
SNW1 complex	DDB1	0		0	0	0		0	0	6	60	0.1	0.03125
SNW1 complex	DDX23	10.5	45	0.233333	0.0569106	4.5	45	0.1	0.0322581	0		0	0
SNW1 complex	EEF1G	3.5	26	0.134615	0.032833	4	26	0.153846	0.0496278	3	26	0.115385	0.0360577
SNW1 complex	EFTUD2	25.5	55	0.463636	0.113082	16	55	0.290909	0.0938416	4.5	55	0.0818182	0.0255682
SNW1 complex	HNRNPU	10.5	31	0.33871	0.0826121	9.5	31	0.306452	0.0988554	9	31	0.290323	0.0907258
SNW1 complex	HSPA5	2.5	33	0.0757576	0.0184775	5	33	0.151515	0.0488759	4.5	33	0.136364	0.0426136
SNW1 complex	MATR3	11.5	44	0.261364	0.0637472	12	44	0.272727	0.0879765	20.5	44	0.465909	0.145597
SNW1 complex	PRPF8	34	137	0.248175	0.0605305	35.5	137	0.259124	0.0835884	4.5	137	0.0328467	0.0102646
SNW1 complex	SFPQ	43.5	30	1.45	0.353659	44	30	1.46667	0.473118	0		0	0
SNW1 complex	SNRNP200	43.5	122	0.356557	0.0869652	37.5	122	0.307377	0.0991539	7	122	0.057377	0.0179303
SNW1 complex	SNW1	2.5	27	0.0925926	0.0225836	0		0	0	0		0	0
SNW1 complex	TUBB	3	23	0.130435	0.0318134	2	23	0.0869565	0.0280505	0		0	0
		p-value	total (T)	query (Q)	T&Q	p-value	total (T)	query (Q)	T&Q	p-value	total (T)	query (Q)	T&Q
Corum complex ID: 1335		5.17e-06	19	324	13	0.000153	19	279	11	0.00275	19	236	9
Complex	Prey in complex	avg TSC	in silico pept/prot	avg TSC/in silico pept	(prey avg TSC/in silico pept) / (Nol12 avg TSC/in silico pept)	avg TSC	in silico pept/prot	avg TSC/in silico pept	(prey avg TSC/in silico pept) / (Nol12 avg TSC/in silico pept)	avg TSC	in silico pept/prot	avg TSC/in silico pept	(prey avg TSC/in silico pept) / (Nol12 avg TSC/in silico pept)
C complex spliceosome	CDC5L	7.5	37	0.202703	0.0494397	0		0	0	6	37	0.162162	0.0506757
C complex spliceosome	DDX23	10.5	45	0.233333	0.0569106	4.5	45	0.1	0.0322581	0		0	0
C complex spliceosome	DDX5	16	33	0.484848	0.118256	26	33	0.787879	0.254154	5	33	0.151515	0.0473485
C complex spliceosome	EFTUD2	25.5	55	0.463636	0.113082	16	55	0.290909	0.0938416	4.5	55	0.0818182	0.0255682
C complex spliceosome	EIF4A3	3.5	25	0.14	0.0341463	5.5	25	0.22	0.0709677	2.5	25	0.1	0.03125
C complex spliceosome	HNRNPA1	9.5	17	0.558824	0.136298	0		0	0	0		0	0
C complex spliceosome	HNRNPA2B1	6	19	0.315789	0.0770218	2	19	0.105263	0.0339559	0		0	0
C complex spliceosome	HNRNPA3	4	18	0.222222	0.0542005	0		0	0	0		0	0
C complex spliceosome	HNRNPC	2	17	0.117647	0.0286944	12.5	17	0.735294	0.237192	11.5	17	0.676471	0.211397
C complex spliceosome	HNRNPF									3.5	21	0.166667	0.0520833
C complex spliceosome	HNRNPH1	6	23	0.26087	0.0636267	0		0	0	3	23	0.130435	0.0407609
C complex spliceosome	HNRNPK	7	25	0.28	0.0682927	3	25	0.12	0.0387097	0		0	0
C complex spliceosome	HNRNPM	48	45	1.06667	0.260163	14	45	0.311111	0.100358	20	45	0.444444	0.138889
C complex spliceosome	HNRNPR	0		0	0	6.5	33	0.19697	0.0635386	0		0	0
C complex spliceosome	HNRNPU	10.5	31	0.33871	0.0826121	9.5	31	0.306452	0.0988554	9	31	0.290323	0.0907258
C complex spliceosome	PABPC1	5.5	33	0.166667	0.0406504	22.5	33	0.681818	0.219941	0		0	0
C complex spliceosome	PNN	0		0	0	3.5	42	0.0833333	0.0268817	0		0	0
C complex spliceosome	PRPF19	9.5	22	0.431818	0.105322	3	22	0.136364	0.0439883	6	22	0.272727	0.0852273
C complex spliceosome	PRPF4B	4.5	41	0.109756	0.0267698	0		0	0	0		0	0
C complex spliceosome	PRPF6	12.5	57	0.219298	0.0534874	8	57	0.140351	0.0452745	0		0	0
C complex spliceosome	PRPF8	34	137	0.248175	0.0605305	35.5	137	0.259124	0.0835884	4.5	137	0.0328467	0.0102646
C complex spliceosome	RALY	0		0	0	7	18	0.388889	0.125448	5.5	18	0.305556	0.0954861
C complex spliceosome	RBMX	5.5	22	0.25	0.0609756	22.5	22	1.02273	0.329912	0		0	0
C complex spliceosome	SART1	2.5	40	0.0625	0.0152439	5.5	40	0.1375	0.0443548	0		0	0
C complex spliceosome	SF3B1	5.5	65	0.0846154	0.0206379	0		0	0	3	65	0.0461538	0.0144231
C complex spliceosome	SF3B2	6	48	0.125	0.0304878	0		0	0	0		0	0
C complex spliceosome	SF3B3	3	62	0.0483871	0.0118017	0		0	0	0		0	0
C complex spliceosome	SKIV2L2	16	56	0.285714	0.0696864	14.5	56	0.258929	0.0835253	3	56	0.0535714	0.0167411
C complex spliceosome	SNRNP200	43.5	122	0.356557	0.0869652	37.5	122	0.307377	0.0991539	7	122	0.057377	0.0179303
C complex spliceosome	SNRPA1	0		0	0	4	12	0.333333	0.107527	0		0	0
C complex spliceosome	SNRPB2	3	11	0.272727	0.0665188	2.5	11	0.227273	0.0733138	0		0	0
C complex spliceosome	SNW1	2.5	27	0.0925926	0.0225836	0		0	0	0		0	0
C complex spliceosome	SRRM1									3	41	0.0731707	0.0228659
C complex spliceosome	SRSF1	8.5	13	0.653846	0.159475	0		0	0	0		0	0
C complex spliceosome	SYNCRIP	4.5	30	0.15	0.0365854	0		0	0	4	30	0.133333	0.0416667
		p-value	total (T)	query (Q)	T&Q	p-value	total (T)	query (Q)	T&Q	p-value	total (T)	query (Q)	T&Q
Corum complex ID: 1181		6.59e-06	79	324	29	0.00416	79	279	22	0.105	79	236	17
Complex	Prey in complex	avg TSC	in silico pept/prot	avg TSC/in silico pept	(prey avg TSC/in silico pept) / (Nol12 avg TSC/in silico pept)	avg TSC	in silico pept/prot	avg TSC/in silico pept	(prey avg TSC/in silico pept) / (Nol12 avg TSC/in silico pept)	avg TSC	in silico pept/prot	avg TSC/in silico pept	(prey avg TSC/in silico pept) / (Nol12 avg TSC/in silico pept)
DNA-PK-Ku-eIF2-NF90-NF45 complex	EIF2S1	3.5	22	0.159091	0.0388027	0		0	0	0		0	0
DNA-PK-Ku-eIF2-NF90-NF45 complex	EIF2S2	2	21	0.0952381	0.0232288	0		0	0	0		0	0
DNA-PK-Ku-eIF2-NF90-NF45 complex	EIF2S3	4.5	23	0.195652	0.04772	5	23	0.217391	0.0701262	0		0	0
DNA-PK-Ku-eIF2-NF90-NF45 complex	ILF2	13.5	19	0.710526	0.173299	7.5	19	0.394737	0.127334	3.5	19	0.184211	0.0575658
DNA-PK-Ku-eIF2-NF90-NF45 complex	ILF3	11.5	42	0.27381	0.0667828	9.5	42	0.22619	0.0729647	11.5	42	0.27381	0.0855655
DNA-PK-Ku-eIF2-NF90-NF45 complex	PRKDC	31.5	242	0.130165	0.0317476	43	242	0.177686	0.057318	26	242	0.107438	0.0335744
DNA-PK-Ku-eIF2-NF90-NF45 complex	XRCC5	3.5	40	0.0875	0.0213415	9	40	0.225	0.0725806	5.5	40	0.1375	0.0429688
DNA-PK-Ku-eIF2-NF90-NF45 complex	XRCC6	7.5	35	0.214286	0.0522648	14	35	0.4	0.129032	8	35	0.228571	0.0714286
		p-value	total (T)	query (Q)	T&Q	p-value	total (T)	query (Q)	T&Q	p-value	total (T)	query (Q)	T&Q
Corum complex ID: 5183		1.29e-05	8	324	8	0.00722	8	279	6	0.0439	8	236	5
Complex	Prey in complex	avg TSC	in silico pept/prot	avg TSC/in silico pept	(prey avg TSC/in silico pept) / (Nol12 avg TSC/in silico pept)	avg TSC	in silico pept/prot	avg TSC/in silico pept	(prey avg TSC/in silico pept) / (Nol12 avg TSC/in silico pept)	avg TSC	in silico pept/prot	avg TSC/in silico pept	(prey avg TSC/in silico pept) / (Nol12 avg TSC/in silico pept)
CCT micro-complex	CCT2	9.5	30	0.316667	0.0772358	9.5	30	0.316667	0.102151	9.5	30	0.316667	0.0989583
CCT micro-complex	CCT3	5	33	0.151515	0.0369549	0		0	0	0		0	0
CCT micro-complex	CCT4	4.5	32	0.140625	0.0342988	6	32	0.1875	0.0604839	8	32	0.25	0.078125
CCT micro-complex	CCT5	7.5	34	0.220588	0.053802	9.5	34	0.279412	0.0901328	6.5	34	0.191176	0.0597426
CCT micro-complex	CCT6A	10	27	0.37037	0.0903342	6	27	0.222222	0.0716846	3	27	0.111111	0.0347222
CCT micro-complex	CCT7	2	31	0.0645161	0.0157356	6	31	0.193548	0.062435	6	31	0.193548	0.0604839
CCT micro-complex	CCT8	7	38	0.184211	0.0449294	6.5	38	0.171053	0.0551783	5.5	38	0.144737	0.0452303
CCT micro-complex	TCP1	9.5	32	0.296875	0.0724085	6	32	0.1875	0.0604839	6	32	0.1875	0.0585938
		p-value	total (T)	query (Q)	T&Q	p-value	total (T)	query (Q)	T&Q	p-value	total (T)	query (Q)	T&Q
Corum complex ID: 126		1.29e-05	8	324	8	0.000247	8	279	7	6.18e-05	8	236	7
Complex	Prey in complex	avg TSC	in silico pept/prot	avg TSC/in silico pept	(prey avg TSC/in silico pept) / (Nol12 avg TSC/in silico pept)	avg TSC	in silico pept/prot	avg TSC/in silico pept	(prey avg TSC/in silico pept) / (Nol12 avg TSC/in silico pept)	avg TSC	in silico pept/prot	avg TSC/in silico pept	(prey avg TSC/in silico pept) / (Nol12 avg TSC/in silico pept)
Large Drosha complex	DDX1	14.5	42	0.345238	0.0842044	42.5	42	1.0119	0.326421	11.5	42	0.27381	0.0855655
Large Drosha complex	DDX17	16	36	0.444444	0.108401	17.5	36	0.486111	0.15681	11	36	0.305556	0.0954861
Large Drosha complex	DDX3X	11	41	0.268293	0.0654372	8	41	0.195122	0.0629426	7.5	41	0.182927	0.0571646
Large Drosha complex	DDX5	16	33	0.484848	0.118256	26	33	0.787879	0.254154	5	33	0.151515	0.0473485
Large Drosha complex	DHX15	10.5	41	0.256098	0.0624628	0		0	0	10.5	41	0.256098	0.0800305
Large Drosha complex	EWSR1	2	16	0.125	0.0304878	0		0	0	0		0	0
Large Drosha complex	FUS	2.5	12	0.208333	0.050813	0		0	0	0		0	0
Large Drosha complex	HNRNPH1	6	23	0.26087	0.0636267	0		0	0	3	23	0.130435	0.0407609
Large Drosha complex	HNRNPM	48	45	1.06667	0.260163	14	45	0.311111	0.100358	20	45	0.444444	0.138889
Large Drosha complex	HNRNPU	10.5	31	0.33871	0.0826121	9.5	31	0.306452	0.0988554	9	31	0.290323	0.0907258
Large Drosha complex	ILF2	13.5	19	0.710526	0.173299	7.5	19	0.394737	0.127334	3.5	19	0.184211	0.0575658
Large Drosha complex	ILF3	11.5	42	0.27381	0.0667828	9.5	42	0.22619	0.0729647	11.5	42	0.27381	0.0855655
Large Drosha complex	RALY	0		0	0	7	18	0.388889	0.125448	5.5	18	0.305556	0.0954861
Large Drosha complex	SRPK1	5.5	31	0.177419	0.043273	7	31	0.225806	0.0728408	0		0	0
		p-value	total (T)	query (Q)	T&Q	p-value	total (T)	query (Q)	T&Q	p-value	total (T)	query (Q)	T&Q
Corum complex ID: 1332		1.31e-05	20	324	13	0.00285	20	279	10	4.4e-05	20	236	11
Complex	Prey in complex	avg TSC	in silico pept/prot	avg TSC/in silico pept	(prey avg TSC/in silico pept) / (Nol12 avg TSC/in silico pept)	avg TSC	in silico pept/prot	avg TSC/in silico pept	(prey avg TSC/in silico pept) / (Nol12 avg TSC/in silico pept)	avg TSC	in silico pept/prot	avg TSC/in silico pept	(prey avg TSC/in silico pept) / (Nol12 avg TSC/in silico pept)
DGCR8 multiprotein complex	DDX17	16	36	0.444444	0.108401	17.5	36	0.486111	0.15681	11	36	0.305556	0.0954861
DGCR8 multiprotein complex	DDX5	16	33	0.484848	0.118256	26	33	0.787879	0.254154	5	33	0.151515	0.0473485
DGCR8 multiprotein complex	DHX9	46	68	0.676471	0.164993	40	68	0.588235	0.189753	63.5	68	0.933824	0.29182
DGCR8 multiprotein complex	FUS	2.5	12	0.208333	0.050813	0		0	0	0		0	0
DGCR8 multiprotein complex	HNRNPH1	6	23	0.26087	0.0636267	0		0	0	3	23	0.130435	0.0407609
DGCR8 multiprotein complex	HNRNPR					6.5	33	0.19697	0.0635386
DGCR8 multiprotein complex	HNRNPU	10.5	31	0.33871	0.0826121	9.5	31	0.306452	0.0988554	9	31	0.290323	0.0907258
DGCR8 multiprotein complex	HSPA5	2.5	33	0.0757576	0.0184775	5	33	0.151515	0.0488759	4.5	33	0.136364	0.0426136
DGCR8 multiprotein complex	ILF3	11.5	42	0.27381	0.0667828	9.5	42	0.22619	0.0729647	11.5	42	0.27381	0.0855655
DGCR8 multiprotein complex	NCL	18	31	0.580645	0.141621	0		0	0	0		0	0
		p-value	total (T)	query (Q)	T&Q	p-value	total (T)	query (Q)	T&Q	p-value	total (T)	query (Q)	T&Q
Corum complex ID: 3082		7.03e-05	11	324	9	0.00756	11	279	7	0.00199	11	236	7
Complex	Prey in complex	avg TSC	in silico pept/prot	avg TSC/in silico pept	(prey avg TSC/in silico pept) / (Nol12 avg TSC/in silico pept)	avg TSC	in silico pept/prot	avg TSC/in silico pept	(prey avg TSC/in silico pept) / (Nol12 avg TSC/in silico pept)	avg TSC	in silico pept/prot	avg TSC/in silico pept	(prey avg TSC/in silico pept) / (Nol12 avg TSC/in silico pept)
Toposome	DDX21	50.5	42	1.20238	0.293264	42	42	1	0.322581	33.5	42	0.797619	0.249256
Toposome	DHX9	46	68	0.676471	0.164993	40	68	0.588235	0.189753	63.5	68	0.933824	0.29182
Toposome	HNRNPC	2	17	0.117647	0.0286944	12.5	17	0.735294	0.237192	11.5	17	0.676471	0.211397
Toposome	PRPF8	34	137	0.248175	0.0605305	35.5	137	0.259124	0.0835884	4.5	137	0.0328467	0.0102646
Toposome	SRPK1	5.5	31	0.177419	0.043273	7	31	0.225806	0.0728408	0		0	0
Toposome	SSRP1	2.5	33	0.0757576	0.0184775	3.5	33	0.106061	0.0342131	8	33	0.242424	0.0757576
Toposome	TOP2A	9	83	0.108434	0.0264473	6	83	0.0722892	0.0233191	18	83	0.216867	0.0677711
		p-value	total (T)	query (Q)	T&Q	p-value	total (T)	query (Q)	T&Q	p-value	total (T)	query (Q)	T&Q
Corum complex ID: 924		0.000102	7	324	7	3.41e-05	7	279	7	0.000591	7	236	6
Complex	Prey in complex	avg TSC	in silico pept/prot	avg TSC/in silico pept	(prey avg TSC/in silico pept) / (Nol12 avg TSC/in silico pept)	avg TSC	in silico pept/prot	avg TSC/in silico pept	(prey avg TSC/in silico pept) / (Nol12 avg TSC/in silico pept)	avg TSC	in silico pept/prot	avg TSC/in silico pept	(prey avg TSC/in silico pept) / (Nol12 avg TSC/in silico pept)
DHX9-ADAR-vigilin-DNA-PK-Ku antigen complex	ADAR	11.5	70	0.164286	0.0400697	13.5	70	0.192857	0.062212	5.5	70	0.0785714	0.0245536
DHX9-ADAR-vigilin-DNA-PK-Ku antigen complex	DHX9	46	68	0.676471	0.164993	40	68	0.588235	0.189753	63.5	68	0.933824	0.29182
DHX9-ADAR-vigilin-DNA-PK-Ku antigen complex	HDLBP	4	66	0.0606061	0.014782	0		0	0	0		0	0
DHX9-ADAR-vigilin-DNA-PK-Ku antigen complex	PRKDC	31.5	242	0.130165	0.0317476	43	242	0.177686	0.057318	26	242	0.107438	0.0335744
DHX9-ADAR-vigilin-DNA-PK-Ku antigen complex	XRCC5	3.5	40	0.0875	0.0213415	9	40	0.225	0.0725806	5.5	40	0.1375	0.0429688
DHX9-ADAR-vigilin-DNA-PK-Ku antigen complex	XRCC6	7.5	35	0.214286	0.0522648	14	35	0.4	0.129032	8	35	0.228571	0.0714286
		p-value	total (T)	query (Q)	T&Q	p-value	total (T)	query (Q)	T&Q	p-value	total (T)	query (Q)	T&Q
Corum complex ID: 3102		0.000806	6	324	6	0.0157	6	279	5	0.00552	6	236	5
Complex	Prey in complex	avg TSC	in silico pept/prot	avg TSC/in silico pept	(prey avg TSC/in silico pept) / (Nol12 avg TSC/in silico pept)	avg TSC	in silico pept/prot	avg TSC/in silico pept	(prey avg TSC/in silico pept) / (Nol12 avg TSC/in silico pept)	avg TSC	in silico pept/prot	avg TSC/in silico pept	(prey avg TSC/in silico pept) / (Nol12 avg TSC/in silico pept)
TNF-alpha/NF-kappa B signaling complex 6	FBL	22	19	1.15789	0.282413	9	19	0.473684	0.152801	9	19	0.473684	0.148026
TNF-alpha/NF-kappa B signaling complex 6	HSP90AA1	16.5	37	0.445946	0.108767	13	37	0.351351	0.113339	10.5	37	0.283784	0.0886824
TNF-alpha/NF-kappa B signaling complex 6	HSP90AB1	2	38	0.0526316	0.012837	4.5	38	0.118421	0.0382003	0		0	0
TNF-alpha/NF-kappa B signaling complex 6	RPL30	10.5	6	1.75	0.426829	13	6	2.16667	0.698925	11.5	6	1.91667	0.598958
TNF-alpha/NF-kappa B signaling complex 6	RPL4	22	17	1.29412	0.315638	31.5	17	1.85294	0.597723	40	17	2.35294	0.735294
TNF-alpha/NF-kappa B signaling complex 6	RPL6	30.5	15	2.03333	0.495935	33	15	2.2	0.709677	44	15	2.93333	0.916667
TNF-alpha/NF-kappa B signaling complex 6	RPL8	10.5	8	1.3125	0.320122	16	8	2	0.645161	21	8	2.625	0.820312
TNF-alpha/NF-kappa B signaling complex 6	RPS11	6	9	0.666667	0.162602	9	9	1	0.322581	8	9	0.888889	0.277778
TNF-alpha/NF-kappa B signaling complex 6	RPS13	15	9	1.66667	0.406504	35	9	3.88889	1.25448	30	9	3.33333	1.04167
		p-value	total (T)	query (Q)	T&Q	p-value	total (T)	query (Q)	T&Q	p-value	total (T)	query (Q)	T&Q
Corum complex ID: 5266		0.00179	14	324	9	0.00048	14	279	9	0.00139	14	236	8
Complex	Prey in complex	avg TSC	in silico pept/prot	avg TSC/in silico pept	(prey avg TSC/in silico pept) / (Nol12 avg TSC/in silico pept)	avg TSC	in silico pept/prot	avg TSC/in silico pept	(prey avg TSC/in silico pept) / (Nol12 avg TSC/in silico pept)	avg TSC	in silico pept/prot	avg TSC/in silico pept	(prey avg TSC/in silico pept) / (Nol12 avg TSC/in silico pept)
CDC5L complex	CDC5L	7.5	37	0.202703	0.0494397	0		0	0	6	37	0.162162	0.0506757
CDC5L complex	DYNC1H1	15	265	0.0566038	0.0138058	25	265	0.0943396	0.0304321	10	265	0.0377358	0.0117925
CDC5L complex	GCN1L1	15.5	164	0.0945122	0.0230518	14.5	164	0.0884146	0.0285208	3	164	0.0182927	0.00571646
CDC5L complex	HSPA8	9	35	0.257143	0.0627178	7	35	0.2	0.0645161	10	35	0.285714	0.0892857
CDC5L complex	ILF2	13.5	19	0.710526	0.173299	7.5	19	0.394737	0.127334	3.5	19	0.184211	0.0575658
CDC5L complex	PRKDC	31.5	242	0.130165	0.0317476	43	242	0.177686	0.057318	26	242	0.107438	0.0335744
CDC5L complex	PRPF19	9.5	22	0.431818	0.105322	3	22	0.136364	0.0439883	6	22	0.272727	0.0852273
CDC5L complex	RBMX	5.5	22	0.25	0.0609756	22.5	22	1.02273	0.329912	0		0	0
CDC5L complex	SF3B1	5.5	65	0.0846154	0.0206379	0		0	0	3	65	0.0461538	0.0144231
CDC5L complex	SF3B2	6	48	0.125	0.0304878	0		0	0	0		0	0
CDC5L complex	SFPQ	43.5	30	1.45	0.353659	44	30	1.46667	0.473118
CDC5L complex	SNRPA1					4	12	0.333333	0.107527
CDC5L complex	SRRM1									3	41	0.0731707	0.0228659
CDC5L complex	SRSF1	8.5	13	0.653846	0.159475	0		0	0	0		0	0
CDC5L complex	TOP2A	9	83	0.108434	0.0264473	6	83	0.0722892	0.0233191	18	83	0.216867	0.0677711
		p-value	total (T)	query (Q)	T&Q	p-value	total (T)	query (Q)	T&Q	p-value	total (T)	query (Q)	T&Q
Corum complex ID: 1183		0.00596	30	324	13	0.168	30	279	10	0.0345	30	236	10
Complex	Prey in complex	avg TSC	in silico pept/prot	avg TSC/in silico pept	(prey avg TSC/in silico pept) / (Nol12 avg TSC/in silico pept)	avg TSC	in silico pept/prot	avg TSC/in silico pept	(prey avg TSC/in silico pept) / (Nol12 avg TSC/in silico pept)	avg TSC	in silico pept/prot	avg TSC/in silico pept	(prey avg TSC/in silico pept) / (Nol12 avg TSC/in silico pept)
Emerin complex 52	ACTB	12	20	0.6	0.146341	3	20	0.15	0.0483871	0		0	0
Emerin complex 52	C1QBP	8.5	14	0.607143	0.148084	3.5	14	0.25	0.0806452	8	14	0.571429	0.178571
Emerin complex 52	CKB	9.5	25	0.38	0.0926829	2.5	25	0.1	0.0322581	0		0	0
Emerin complex 52	EMD	2.5	15	0.166667	0.0406504	0		0	0	3	15	0.2	0.0625
Emerin complex 52	HNRNPK	7	25	0.28	0.0682927	3	25	0.12	0.0387097	0		0	0
Emerin complex 52	HNRNPL	3.5	27	0.12963	0.031617	5	27	0.185185	0.0597372	3.5	27	0.12963	0.0405093
Emerin complex 52	HNRNPU	10.5	31	0.33871	0.0826121	9.5	31	0.306452	0.0988554	9	31	0.290323	0.0907258
Emerin complex 52	ILF3	11.5	42	0.27381	0.0667828	9.5	42	0.22619	0.0729647	11.5	42	0.27381	0.0855655
Emerin complex 52	IQGAP1	12.5	83	0.150602	0.0367323	5.5	83	0.0662651	0.0213758	0		0	0
Emerin complex 52	LMNB1	2	36	0.0555556	0.0135501	0		0	0	0		0	0
Emerin complex 52	YWHAE	4	17	0.235294	0.0573888	3.5	17	0.205882	0.0664137	3	17	0.176471	0.0551471
		p-value	total (T)	query (Q)	T&Q	p-value	total (T)	query (Q)	T&Q	p-value	total (T)	query (Q)	T&Q
Corum complex ID: 5615		0.00807	23	324	11	0.0789	23	279	9	1	23	236	6
Complex	Prey in complex	avg TSC	in silico pept/prot	avg TSC/in silico pept	(prey avg TSC/in silico pept) / (Nol12 avg TSC/in silico pept)	avg TSC	in silico pept/prot	avg TSC/in silico pept	(prey avg TSC/in silico pept) / (Nol12 avg TSC/in silico pept)	avg TSC	in silico pept/prot	avg TSC/in silico pept	(prey avg TSC/in silico pept) / (Nol12 avg TSC/in silico pept)
TLE1 corepressor complex (MASH1 promoter-corepressor complex)	ACTB	12	20	0.6	0.146341	3	20	0.15	0.0483871	0		0	0
TLE1 corepressor complex (MASH1 promoter-corepressor complex)	HSPA4	4	53	0.0754717	0.0184077	2.5	53	0.0471698	0.0152161	3	53	0.0566038	0.0176887
TLE1 corepressor complex (MASH1 promoter-corepressor complex)	MYH10	10	107	0.0934579	0.0227946	10.5	107	0.0981308	0.0316551	8	107	0.0747664	0.0233645
TLE1 corepressor complex (MASH1 promoter-corepressor complex)	NCL	18	31	0.580645	0.141621	0		0	0	0		0	0
TLE1 corepressor complex (MASH1 promoter-corepressor complex)	NONO	40.5	24	1.6875	0.411585	43	24	1.79167	0.577957	0		0	0
TLE1 corepressor complex (MASH1 promoter-corepressor complex)	NPM1	27.5	12	2.29167	0.558943	11	12	0.916667	0.295699	7.5	12	0.625	0.195312
TLE1 corepressor complex (MASH1 promoter-corepressor complex)	PARP1	14	56	0.25	0.0609756	17.5	56	0.3125	0.100806	9	56	0.160714	0.0502232
TLE1 corepressor complex (MASH1 promoter-corepressor complex)	TOP2B									3.5	90	0.0388889	0.0121528
		p-value	total (T)	query (Q)	T&Q	p-value	total (T)	query (Q)	T&Q	p-value	total (T)	query (Q)	T&Q
Corum complex ID: 3135		0.00863	10	324	7	0.0446	10	279	6	0.169	10	236	5
Complex	Prey in complex	avg TSC	in silico pept/prot	avg TSC/in silico pept	(prey avg TSC/in silico pept) / (Nol12 avg TSC/in silico pept)	avg TSC	in silico pept/prot	avg TSC/in silico pept	(prey avg TSC/in silico pept) / (Nol12 avg TSC/in silico pept)	avg TSC	in silico pept/prot	avg TSC/in silico pept	(prey avg TSC/in silico pept) / (Nol12 avg TSC/in silico pept)
eIF3 complex (EIF3S6, EIF3S5, EIF3S4, EIF3S3, EIF3S6IP, EIF3S2, EIF3S9, EIF3S12, EIF3S10, EIF3S8, EIF3S1, EIF3S7, PCID1)	EIF3A	15	73	0.205479	0.0501169	25	73	0.342466	0.110473	3	73	0.0410959	0.0128425
eIF3 complex (EIF3S6, EIF3S5, EIF3S4, EIF3S3, EIF3S6IP, EIF3S2, EIF3S9, EIF3S12, EIF3S10, EIF3S8, EIF3S1, EIF3S7, PCID1)	EIF3B	8	38	0.210526	0.0513479	9.5	38	0.25	0.0806452	4	38	0.105263	0.0328947
eIF3 complex (EIF3S6, EIF3S5, EIF3S4, EIF3S3, EIF3S6IP, EIF3S2, EIF3S9, EIF3S12, EIF3S10, EIF3S8, EIF3S1, EIF3S7, PCID1)	EIF3D	3	25	0.12	0.0292683	4.5	25	0.18	0.0580645	0		0	0
eIF3 complex (EIF3S6, EIF3S5, EIF3S4, EIF3S3, EIF3S6IP, EIF3S2, EIF3S9, EIF3S12, EIF3S10, EIF3S8, EIF3S1, EIF3S7, PCID1)	EIF3E	2	30	0.0666667	0.0162602	6	30	0.2	0.0645161	0		0	0
eIF3 complex (EIF3S6, EIF3S5, EIF3S4, EIF3S3, EIF3S6IP, EIF3S2, EIF3S9, EIF3S12, EIF3S10, EIF3S8, EIF3S1, EIF3S7, PCID1)	EIF3F	4	17	0.235294	0.0573888	5	17	0.294118	0.0948767	0		0	0
eIF3 complex (EIF3S6, EIF3S5, EIF3S4, EIF3S3, EIF3S6IP, EIF3S2, EIF3S9, EIF3S12, EIF3S10, EIF3S8, EIF3S1, EIF3S7, PCID1)	EIF3H	0		0	0	5.5	22	0.25	0.0806452	0		0	0
eIF3 complex (EIF3S6, EIF3S5, EIF3S4, EIF3S3, EIF3S6IP, EIF3S2, EIF3S9, EIF3S12, EIF3S10, EIF3S8, EIF3S1, EIF3S7, PCID1)	EIF3I	2	20	0.1	0.0243902	4.5	20	0.225	0.0725806	0		0	0
eIF3 complex (EIF3S6, EIF3S5, EIF3S4, EIF3S3, EIF3S6IP, EIF3S2, EIF3S9, EIF3S12, EIF3S10, EIF3S8, EIF3S1, EIF3S7, PCID1)	EIF3K	0		0	0	2	12	0.166667	0.0537634	0		0	0
eIF3 complex (EIF3S6, EIF3S5, EIF3S4, EIF3S3, EIF3S6IP, EIF3S2, EIF3S9, EIF3S12, EIF3S10, EIF3S8, EIF3S1, EIF3S7, PCID1)	EIF3L	4.5	34	0.132353	0.0322812	7.5	34	0.220588	0.0711575	0		0	0
eIF3 complex (EIF3S6, EIF3S5, EIF3S4, EIF3S3, EIF3S6IP, EIF3S2, EIF3S9, EIF3S12, EIF3S10, EIF3S8, EIF3S1, EIF3S7, PCID1)	EIF3M	2	21	0.0952381	0.0232288	3	21	0.142857	0.0460829	0		0	0
		p-value	total (T)	query (Q)	T&Q	p-value	total (T)	query (Q)	T&Q	p-value	total (T)	query (Q)	T&Q
Corum complex ID: 1097		0.00918	13	324	8	9.03e-06	13	279	10	1	13	236	2
Complex	Prey in complex	avg TSC	in silico pept/prot	avg TSC/in silico pept	(prey avg TSC/in silico pept) / (Nol12 avg TSC/in silico pept)	avg TSC	in silico pept/prot	avg TSC/in silico pept	(prey avg TSC/in silico pept) / (Nol12 avg TSC/in silico pept)	avg TSC	in silico pept/prot	avg TSC/in silico pept	(prey avg TSC/in silico pept) / (Nol12 avg TSC/in silico pept)
Spliceosome	ACIN1	2	63	0.031746	0.00774293	0		0	0	0		0	0
Spliceosome	CDC5L	7.5	37	0.202703	0.0494397	0		0	0	6	37	0.162162	0.0506757
Spliceosome	CTNNBL1					3	25	0.12	0.0387097
Spliceosome	DDX17	16	36	0.444444	0.108401	17.5	36	0.486111	0.15681	11	36	0.305556	0.0954861
Spliceosome	DDX23	10.5	45	0.233333	0.0569106	4.5	45	0.1	0.0322581	0		0	0
Spliceosome	DDX39B	3	24	0.125	0.0304878	3	24	0.125	0.0403226	3	24	0.125	0.0390625
Spliceosome	DDX3X	11	41	0.268293	0.0654372	8	41	0.195122	0.0629426	7.5	41	0.182927	0.0571646
Spliceosome	DDX5	16	33	0.484848	0.118256	26	33	0.787879	0.254154	5	33	0.151515	0.0473485
Spliceosome	DHX15	10.5	41	0.256098	0.0624628	0		0	0	10.5	41	0.256098	0.0800305
Spliceosome	DHX9	46	68	0.676471	0.164993	40	68	0.588235	0.189753	63.5	68	0.933824	0.29182
Spliceosome	EFTUD2	25.5	55	0.463636	0.113082	16	55	0.290909	0.0938416	4.5	55	0.0818182	0.0255682
Spliceosome	EIF4A3	3.5	25	0.14	0.0341463	5.5	25	0.22	0.0709677	2.5	25	0.1	0.03125
Spliceosome	IGF2BP3	3	31	0.0967742	0.0236035	2.5	31	0.0806452	0.0260146	0		0	0
Spliceosome	MOV10					2.5	55	0.0454545	0.0146628	4.5	55	0.0818182	0.0255682
Spliceosome	NHP2L1	4.5	7	0.642857	0.156794	0		0	0	0		0	0
Spliceosome	PABPC1	5.5	33	0.166667	0.0406504	22.5	33	0.681818	0.219941	0		0	0
Spliceosome	PRPF19	9.5	22	0.431818	0.105322	3	22	0.136364	0.0439883	6	22	0.272727	0.0852273
Spliceosome	PRPF4					2.5	30	0.0833333	0.0268817
Spliceosome	PRPF40A					2	39	0.0512821	0.0165426
Spliceosome	PRPF4B	4.5	41	0.109756	0.0267698	0		0	0	0		0	0
Spliceosome	PRPF6	12.5	57	0.219298	0.0534874	8	57	0.140351	0.0452745	0		0	0
Spliceosome	PRPF8	34	137	0.248175	0.0605305	35.5	137	0.259124	0.0835884	4.5	137	0.0328467	0.0102646
Spliceosome	SART1	2.5	40	0.0625	0.0152439	5.5	40	0.1375	0.0443548	0		0	0
Spliceosome	SF3B1	5.5	65	0.0846154	0.0206379	0		0	0	3	65	0.0461538	0.0144231
Spliceosome	SF3B2	6	48	0.125	0.0304878	0		0	0	0		0	0
Spliceosome	SF3B3	3	62	0.0483871	0.0118017	0		0	0	0		0	0
Spliceosome	SKIV2L2	16	56	0.285714	0.0696864	14.5	56	0.258929	0.0835253	3	56	0.0535714	0.0167411
Spliceosome	SMU1	4	30	0.133333	0.0325203	0		0	0	0		0	0
Spliceosome	SNRNP200	43.5	122	0.356557	0.0869652	37.5	122	0.307377	0.0991539	7	122	0.057377	0.0179303
Spliceosome	SNRNP70									3.5	19	0.184211	0.0575658
Spliceosome	SNRPA1					4	12	0.333333	0.107527
Spliceosome	SNRPB2	3	11	0.272727	0.0665188	2.5	11	0.227273	0.0733138	0		0	0
Spliceosome	SNW1	2.5	27	0.0925926	0.0225836	0		0	0	0		0	0
Spliceosome	SRRM1									3	41	0.0731707	0.0228659
Spliceosome	SRSF1	8.5	13	0.653846	0.159475	0		0	0	0		0	0
Spliceosome	SRSF3	4.5	6	0.75	0.182927	0		0	0	0		0	0
Spliceosome	SRSF5	3	7	0.428571	0.10453	0		0	0	0		0	0
Spliceosome	SRSF7	5.5	10	0.55	0.134146	0		0	0	0		0	0
Spliceosome	THOC2	8.5	79	0.107595	0.0262427	2.5	79	0.0316456	0.0102082	0		0	0
Spliceosome	THOC6	3.5	19	0.184211	0.0449294	0		0	0	0		0	0
Spliceosome	TRA2B	4	11	0.363636	0.0886918	0		0	0	2.5	11	0.227273	0.0710227
Spliceosome	USP39	12.5	30	0.416667	0.101626	9.5	30	0.316667	0.102151	0		0	0
		p-value	total (T)	query (Q)	T&Q	p-value	total (T)	query (Q)	T&Q	p-value	total (T)	query (Q)	T&Q
Corum complex ID: 351		0.00941	141	324	35	1	141	279	24	1	141	236	18
Complex	Prey in complex	avg TSC	in silico pept/prot	avg TSC/in silico pept	(prey avg TSC/in silico pept) / (Nol12 avg TSC/in silico pept)	avg TSC	in silico pept/prot	avg TSC/in silico pept	(prey avg TSC/in silico pept) / (Nol12 avg TSC/in silico pept)	avg TSC	in silico pept/prot	avg TSC/in silico pept	(prey avg TSC/in silico pept) / (Nol12 avg TSC/in silico pept)
Exosome	DIS3	2	51	0.0392157	0.0095648	0		0	0	0		0	0
Exosome	EXOSC10	15.5	56	0.276786	0.0675087	12.5	56	0.223214	0.0720046	3.5	56	0.0625	0.0195312
Exosome	EXOSC2	9	15	0.6	0.146341	10.5	15	0.7	0.225806	0		0	0
Exosome	EXOSC4					4	12	0.333333	0.107527
Exosome	EXOSC5	2	11	0.181818	0.0443459	0		0	0	0		0	0
Exosome	EXOSC6	4.5	13	0.346154	0.0844278	3	13	0.230769	0.0744417	0		0	0
Exosome	EXOSC7	4	17	0.235294	0.0573888	5.5	17	0.323529	0.104364	0		0	0
Exosome	EXOSC8					3	16	0.1875	0.0604839
Exosome	EXOSC9	2.5	19	0.131579	0.0320924	0		0	0	0		0	0
		p-value	total (T)	query (Q)	T&Q	p-value	total (T)	query (Q)	T&Q	p-value	total (T)	query (Q)	T&Q
Corum complex ID: 788		0.0211	11	324	7	0.089	11	279	6	1	11	236	1
Complex	Prey in complex	avg TSC	in silico pept/prot	avg TSC/in silico pept	(prey avg TSC/in silico pept) / (Nol12 avg TSC/in silico pept)	avg TSC	in silico pept/prot	avg TSC/in silico pept	(prey avg TSC/in silico pept) / (Nol12 avg TSC/in silico pept)	avg TSC	in silico pept/prot	avg TSC/in silico pept	(prey avg TSC/in silico pept) / (Nol12 avg TSC/in silico pept)
Vigilin-DNA-PK-Ku antigen complex	HDLBP	4	66	0.0606061	0.014782	0		0	0	0		0	0
Vigilin-DNA-PK-Ku antigen complex	PRKDC	31.5	242	0.130165	0.0317476	43	242	0.177686	0.057318	26	242	0.107438	0.0335744
Vigilin-DNA-PK-Ku antigen complex	XRCC5	3.5	40	0.0875	0.0213415	9	40	0.225	0.0725806	5.5	40	0.1375	0.0429688
Vigilin-DNA-PK-Ku antigen complex	XRCC6	7.5	35	0.214286	0.0522648	14	35	0.4	0.129032	8	35	0.228571	0.0714286
		p-value	total (T)	query (Q)	T&Q	p-value	total (T)	query (Q)	T&Q	p-value	total (T)	query (Q)	T&Q
Corum complex ID: 1571		0.0498	4	324	4	0.878	4	279	3	0.433	4	236	3
Complex	Prey in complex	avg TSC	in silico pept/prot	avg TSC/in silico pept	(prey avg TSC/in silico pept) / (Nol12 avg TSC/in silico pept)	avg TSC	in silico pept/prot	avg TSC/in silico pept	(prey avg TSC/in silico pept) / (Nol12 avg TSC/in silico pept)	avg TSC	in silico pept/prot	avg TSC/in silico pept	(prey avg TSC/in silico pept) / (Nol12 avg TSC/in silico pept)
GAIT complex	EPRS	29.5	80	0.36875	0.089939	13	80	0.1625	0.0524194	0		0	0
GAIT complex	GAPDH	14.5	17	0.852941	0.208034	12.5	17	0.735294	0.237192	13	17	0.764706	0.238971
GAIT complex	RPL13A	15	10	1.5	0.365854	32.5	10	3.25	1.04839	41.5	10	4.15	1.29688
GAIT complex	SYNCRIP	4.5	30	0.15	0.0365854	0		0	0	4	30	0.133333	0.0416667
		p-value	total (T)	query (Q)	T&Q	p-value	total (T)	query (Q)	T&Q	p-value	total (T)	query (Q)	T&Q
Corum complex ID: 5385		0.0498	4	324	4	0.878	4	279	3	0.433	4	236	3
Complex	Prey in complex	avg TSC	in silico pept/prot	avg TSC/in silico pept	(prey avg TSC/in silico pept) / (Nol12 avg TSC/in silico pept)	avg TSC	in silico pept/prot	avg TSC/in silico pept	(prey avg TSC/in silico pept) / (Nol12 avg TSC/in silico pept)	avg TSC	in silico pept/prot	avg TSC/in silico pept	(prey avg TSC/in silico pept) / (Nol12 avg TSC/in silico pept)
PABPC1-HSPA8-HNRPD-EIF4G1 complex	EIF4G1	8.5	71	0.119718	0.0291996	8.5	71	0.119718	0.0386188	0		0	0
PABPC1-HSPA8-HNRPD-EIF4G1 complex	HNRNPD	2	15	0.133333	0.0325203	0		0	0	0		0	0
PABPC1-HSPA8-HNRPD-EIF4G1 complex	HSPA8	9	35	0.257143	0.0627178	7	35	0.2	0.0645161	10	35	0.285714	0.0892857
PABPC1-HSPA8-HNRPD-EIF4G1 complex	PABPC1	5.5	33	0.166667	0.0406504	22.5	33	0.681818	0.219941	0		0	0
		p-value	total (T)	query (Q)	T&Q	p-value	total (T)	query (Q)	T&Q	p-value	total (T)	query (Q)	T&Q
Corum complex ID: 1308		0.0498	4	324	4	0.878	4	279	3	1	4	236	1
Complex	Prey in complex	avg TSC	in silico pept/prot	avg TSC/in silico pept	(prey avg TSC/in silico pept) / (Nol12 avg TSC/in silico pept)	avg TSC	in silico pept/prot	avg TSC/in silico pept	(prey avg TSC/in silico pept) / (Nol12 avg TSC/in silico pept)	avg TSC	in silico pept/prot	avg TSC/in silico pept	(prey avg TSC/in silico pept) / (Nol12 avg TSC/in silico pept)
55S ribosome, mitochondrial	DAP3	10.5	23	0.456522	0.111347	6.5	23	0.282609	0.0911641	7	23	0.304348	0.0951087
55S ribosome, mitochondrial	LACTB	0		0	0	0		0	0	4	28	0.142857	0.0446429
55S ribosome, mitochondrial	MRPL12	3.5	10	0.35	0.0853659	0		0	0	0		0	0
55S ribosome, mitochondrial	MRPL15	0		0	0	0		0	0	3	17	0.176471	0.0551471
55S ribosome, mitochondrial	MRPL18	0		0	0	0		0	0	2	10	0.2	0.0625
55S ribosome, mitochondrial	MRPL21	0		0	0	0		0	0	3	13	0.230769	0.0721154
55S ribosome, mitochondrial	MRPL22	0		0	0	5	12	0.416667	0.134409	0		0	0
55S ribosome, mitochondrial	MRPL23	0		0	0	2.5	8	0.3125	0.100806	3	8	0.375	0.117188
55S ribosome, mitochondrial	MRPL24	0		0	0	0		0	0	3	15	0.2	0.0625
55S ribosome, mitochondrial	MRPL38	0		0	0	0		0	0	3	22	0.136364	0.0426136
55S ribosome, mitochondrial	MRPL4	0		0	0	0		0	0	2	17	0.117647	0.0367647
55S ribosome, mitochondrial	MRPL44	0		0	0	0		0	0	2.5	19	0.131579	0.0411184
55S ribosome, mitochondrial	MRPS10	6.5	13	0.5	0.121951	0		0	0	3.5	13	0.269231	0.0841346
55S ribosome, mitochondrial	MRPS11	5.5	9	0.611111	0.149051	0		0	0	0		0	0
55S ribosome, mitochondrial	MRPS14	3	7	0.428571	0.10453	0		0	0	0		0	0
55S ribosome, mitochondrial	MRPS15	6	13	0.461538	0.11257	3	13	0.230769	0.0744417	3.5	13	0.269231	0.0841346
55S ribosome, mitochondrial	MRPS16	0		0	0	0		0	0	2	10	0.2	0.0625
55S ribosome, mitochondrial	MRPS17	0		0	0	2	5	0.4	0.129032	0		0	0
55S ribosome, mitochondrial	MRPS18B	4.5	14	0.321429	0.0783972	3.5	14	0.25	0.0806452	3.5	14	0.25	0.078125
55S ribosome, mitochondrial	MRPS2	7.5	20	0.375	0.0914634	3.5	20	0.175	0.0564516	4.5	20	0.225	0.0703125
55S ribosome, mitochondrial	MRPS22	16.5	23	0.717391	0.174973	7.5	23	0.326087	0.105189	10.5	23	0.456522	0.142663
55S ribosome, mitochondrial	MRPS23	5.5	13	0.423077	0.103189	2.5	13	0.192308	0.0620347	2.5	13	0.192308	0.0600962
55S ribosome, mitochondrial	MRPS25	2	11	0.181818	0.0443459	2	11	0.181818	0.058651	2.5	11	0.227273	0.0710227
55S ribosome, mitochondrial	MRPS26	9	12	0.75	0.182927	6	12	0.5	0.16129	4	12	0.333333	0.104167
55S ribosome, mitochondrial	MRPS27	10	25	0.4	0.097561	6	25	0.24	0.0774194	7	25	0.28	0.0875
55S ribosome, mitochondrial	MRPS28	9	13	0.692308	0.168856	0		0	0	0		0	0
55S ribosome, mitochondrial	MRPS31	18.5	23	0.804348	0.196182	7.5	23	0.326087	0.105189	8	23	0.347826	0.108696
55S ribosome, mitochondrial	MRPS34	11	13	0.846154	0.206379	6.5	13	0.5	0.16129	5	13	0.384615	0.120192
55S ribosome, mitochondrial	MRPS35	11.5	16	0.71875	0.175305	4.5	16	0.28125	0.0907258	3.5	16	0.21875	0.0683594
55S ribosome, mitochondrial	MRPS5	9.5	25	0.38	0.0926829	0		0	0	2.5	25	0.1	0.03125
55S ribosome, mitochondrial	MRPS6	2	8	0.25	0.0609756	0		0	0	0		0	0
55S ribosome, mitochondrial	MRPS7	10	13	0.769231	0.187617	3	13	0.230769	0.0744417	2.5	13	0.192308	0.0600962
55S ribosome, mitochondrial	MRPS9	7.5	25	0.3	0.0731707	4	25	0.16	0.0516129	4.5	25	0.18	0.05625
		p-value	total (T)	query (Q)	T&Q	p-value	total (T)	query (Q)	T&Q	p-value	total (T)	query (Q)	T&Q
Corum complex ID: 320		0.0685	76	324	21	0.541	76	279	17	1.58e-07	76	236	26
Complex	Prey in complex	avg TSC	in silico pept/prot	avg TSC/in silico pept	(prey avg TSC/in silico pept) / (Nol12 avg TSC/in silico pept)	avg TSC	in silico pept/prot	avg TSC/in silico pept	(prey avg TSC/in silico pept) / (Nol12 avg TSC/in silico pept)	avg TSC	in silico pept/prot	avg TSC/in silico pept	(prey avg TSC/in silico pept) / (Nol12 avg TSC/in silico pept)
NCOA6-DNA-PK-Ku-PARP1 complex	PARP1	14	56	0.25	0.0609756	17.5	56	0.3125	0.100806	9	56	0.160714	0.0502232
NCOA6-DNA-PK-Ku-PARP1 complex	PRKDC	31.5	242	0.130165	0.0317476	43	242	0.177686	0.057318	26	242	0.107438	0.0335744
NCOA6-DNA-PK-Ku-PARP1 complex	XRCC5	3.5	40	0.0875	0.0213415	9	40	0.225	0.0725806	5.5	40	0.1375	0.0429688
NCOA6-DNA-PK-Ku-PARP1 complex	XRCC6	7.5	35	0.214286	0.0522648	14	35	0.4	0.129032	8	35	0.228571	0.0714286
		p-value	total (T)	query (Q)	T&Q	p-value	total (T)	query (Q)	T&Q	p-value	total (T)	query (Q)	T&Q
Corum complex ID: 5179		0.224	5	324	4	0.12	5	279	4	0.05	5	236	4

## Sheet: Table S5 DNA repair GO_0006281
Accession
GO:0006281
Name
DNA repair
Ontology
biological_process
Synonyms
None
GO biological process complete	Homo sapiens - REFLIST (20972)	upload_1 (769)	upload_1 (expected)	upload_1 (over/under)	upload_1 (fold Enrichment)	upload_1 (P-value)
GO:0006281	482	39	17.67	+	2.21	0.0488
		Percentage of co-purified proteins normalized to Nol12
Gene ID	Gene Name	100 mM NaCl	100 mM NaCl + Rnase A	300 mM NaCl + Rnase A	Gene Symbol	PANTHER Family / Subfamily	PANTHER Protein Class	Species
HUMAN|HGNC=18697|UniProtKB=Q8N3C0	ASCC3	0.0209604	0.0214214	0	Activating signal cointegrator 1 complex subunit 3;ASCC3;ortholog	ACTIVATING SIGNAL COINTEGRATOR 1 COMPLEX SUBUNIT 3 (PTHR24075:SF4)		Homo sapiens
HUMAN|HGNC=961|UniProtKB=Q9UIG0	BAZ1B	0	0	0.00952744	Tyrosine-protein kinase BAZ1B;BAZ1B;ortholog	TYROSINE-PROTEIN KINASE BAZ1B (PTHR22880:SF195)	acetyltransferase(PC00220);chromatin/chromatin-binding protein(PC00038)	Homo sapiens
HUMAN|HGNC=1743|UniProtKB=Q99459	CDC5L	0.0494397	0	0.0506757	Cell division cycle 5-like protein;CDC5L;ortholog	CELL DIVISION CYCLE 5-LIKE PROTEIN (PTHR10641:SF805)	DNA binding protein(PC00171);transcription factor(PC00009)	Homo sapiens
HUMAN|HGNC=2452|UniProtKB=P48730	CSNK1D	0	0.0322581	0	Casein kinase I isoform delta;CSNK1D;ortholog	CASEIN KINASE I ISOFORM DELTA (PTHR11909:SF269)	non-receptor serine/threonine protein kinase(PC00220)	Homo sapiens
HUMAN|HGNC=2717|UniProtKB=Q16531	DDB1	0	0	0.03125	DNA damage-binding protein 1;DDB1;ortholog	DNA DAMAGE-BINDING PROTEIN 1 (PTHR10644:SF11)	damaged DNA-binding protein(PC00171);mRNA polyadenylation factor(PC00009)	Homo sapiens
HUMAN|HGNC=2734|UniProtKB=Q92499	DDX1	0.0842044	0.326421	0.0855655	ATP-dependent RNA helicase DDX1;DDX1;ortholog	ATP-DEPENDENT RNA HELICASE DDX1 (PTHR24031:SF482)	RNA helicase(PC00171)	Homo sapiens
HUMAN|HGNC=4785|UniProtKB=P62805	HIST1H4J	0.365854	0.451613	0.28125	Histone H4;HIST1H4A;ortholog	HISTONE H4 (PTHR10484:SF144)	histone(PC00171)	Homo sapiens
HUMAN|HGNC=7329|UniProtKB=P52701	MSH6	0.0071736	0	0.0160846	DNA mismatch repair protein Msh6;MSH6;ortholog	DNA MISMATCH REPAIR PROTEIN MSH6 (PTHR11361:SF110)	DNA binding protein(PC00171)	Homo sapiens
HUMAN|HGNC=7677|UniProtKB=Q96MG7	NDNL2	0.0464576	0	0	Melanoma-associated antigen G1;NDNL2;ortholog	MELANOMA-ASSOCIATED ANTIGEN G1 (PTHR11736:SF125)	cell adhesion molecule(PC00069)	Homo sapiens
HUMAN|HGNC=7871|UniProtKB=Q15233	NONO	0.411585	0.577957	0	Non-POU domain-containing octamer-binding protein;NONO;ortholog	NON-POU DOMAIN-CONTAINING OCTAMER-BINDING PROTEIN (PTHR23189:SF63)	mRNA splicing factor(PC00171)	Homo sapiens
HUMAN|HGNC=7910|UniProtKB=P06748	NPM1	0.558943	0.295699	0.195312	Nucleophosmin;NPM1;ortholog	NUCLEOPHOSMIN (PTHR22747:SF21)	chaperone(PC00072)	Homo sapiens
HUMAN|HGNC=270|UniProtKB=P09874	PARP1	0.0609756	0.100806	0.0502232	Poly [ADP-ribose] polymerase 1;PARP1;ortholog	POLY [ADP-RIBOSE] POLYMERASE 1 (PTHR10459:SF83)	DNA ligase(PC00171)	Homo sapiens
HUMAN|HGNC=9188|UniProtKB=P30876	POLR2B	0	0.0176411	0	DNA-directed RNA polymerase II subunit RPB2;POLR2B;ortholog	DNA-DIRECTED RNA POLYMERASE II SUBUNIT RPB2 (PTHR20856:SF27)	DNA-directed RNA polymerase(PC00171);nucleotidyltransferase(PC00031)	Homo sapiens
HUMAN|HGNC=9192|UniProtKB=P19388	POLR2E	0.065666	0	0	DNA-directed RNA polymerases I, II, and III subunit RPABC1;POLR2E;ortholog	DNA-DIRECTED RNA POLYMERASES I, II, AND III SUBUNIT RPABC1 (PTHR10535:SF7)	DNA-directed RNA polymerase(PC00171);nucleotidyltransferase(PC00031)	Homo sapiens
HUMAN|HGNC=9413|UniProtKB=P78527	PRKDC	0.0317476	0.057318	0.0335744	DNA-dependent protein kinase catalytic subunit;PRKDC;ortholog	DNA-DEPENDENT PROTEIN KINASE CATALYTIC SUBUNIT (PTHR11139:SF80)	non-receptor serine/threonine protein kinase(PC00220);nucleotide kinase(PC00137)	Homo sapiens
HUMAN|HGNC=17896|UniProtKB=Q9UMS4	PRPF19	0.105322	0.0439883	0.0852273	Pre-mRNA-processing factor 19;PRPF19;ortholog	PRE-MRNA-PROCESSING FACTOR 19 (PTHR22840:SF14)	mRNA splicing factor(PC00171)	Homo sapiens
HUMAN|HGNC=14219|UniProtKB=Q96PK6	RBM14	0.140713	0.0620347	0	RNA-binding protein 14;RBM14;ortholog	RNA-BINDING PROTEIN 14 (PTHR24012:SF548)		Homo sapiens
HUMAN|HGNC=9948|UniProtKB=P46063	RECQL	0.0203252	0	0	ATP-dependent DNA helicase Q1;RECQL;ortholog	ATP-DEPENDENT DNA HELICASE Q1 (PTHR13710:SF111)	DNA helicase(PC00171)	Homo sapiens
HUMAN|HGNC=10420|UniProtKB=P23396	RPS3	0.108401	0.492832	0.0694444	40S ribosomal protein S3;RPS3;ortholog	40S RIBOSOMAL PROTEIN S3 (PTHR11760:SF26)	ribosomal protein(PC00171)	Homo sapiens
HUMAN|HGNC=10474|UniProtKB=Q9Y265	RUVBL1	0.0831486	0.117302	0.0852273	RuvB-like 1;RUVBL1;ortholog	RUVB-LIKE 1 (PTHR11093:SF7)		Homo sapiens
HUMAN|HGNC=10475|UniProtKB=Q9Y230	RUVBL2	0.0406504	0.0537634	0.0578704	RuvB-like 2;RUVBL2;ortholog	RUVB-LIKE 2 (PTHR11093:SF8)		Homo sapiens
HUMAN|HGNC=10774|UniProtKB=P23246	SFPQ	0.353659	0.473118	0	Splicing factor, proline- and glutamine-rich;SFPQ;ortholog	SPLICING FACTOR, PROLINE- AND GLUTAMINE-RICH (PTHR23189:SF67)	mRNA splicing factor(PC00171)	Homo sapiens
HUMAN|HGNC=11101|UniProtKB=O60264	SMARCA5	0.0150094	0.0124069	0.0120192	SWI/SNF-related matrix-associated actin-dependent regulator of chromatin subfamily A member 5;SMARCA5;ortholog	SWI/SNF-RELATED MATRIX-ASSOCIATED ACTIN-DEPENDENT REGULATOR OF CHROMATIN SUBFAMILY A MEMBER 5 (PTHR10799:SF812)	DNA helicase(PC00171)	Homo sapiens
HUMAN|HGNC=11111|UniProtKB=Q14683	SMC1A	0.0699187	0.0344086	0	Structural maintenance of chromosomes protein 1A;SMC1A;ortholog	STRUCTURAL MAINTENANCE OF CHROMOSOMES PROTEIN 1A (PTHR18937:SF292)	chromatin/chromatin-binding protein(PC00171);hydrolase(PC00009)	Homo sapiens
HUMAN|HGNC=2468|UniProtKB=Q9UQE7	SMC3	0.110095	0.047043	0	Structural maintenance of chromosomes protein 3;SMC3;ortholog	STRUCTURAL MAINTENANCE OF CHROMOSOMES PROTEIN 3 (PTHR18937:SF288)	chromatin/chromatin-binding protein(PC00171);hydrolase(PC00009)	Homo sapiens
HUMAN|HGNC=20465|UniProtKB=Q8IY18	SMC5	0.009996	0	0	Structural maintenance of chromosomes protein 5;SMC5;ortholog	STRUCTURAL MAINTENANCE OF CHROMOSOMES PROTEIN 5 (PTHR19306:SF7)	nucleic acid binding(PC00171)	Homo sapiens
HUMAN|HGNC=20466|UniProtKB=Q96SB8	SMC6	0.0190549	0	0	Structural maintenance of chromosomes protein 6;SMC6;ortholog	STRUCTURAL MAINTENANCE OF CHROMOSOMES PROTEIN 6 (PTHR19306:SF10)		Homo sapiens
HUMAN|HGNC=11327|UniProtKB=Q08945	SSRP1	0.0184775	0.0342131	0.0757576	FACT complex subunit SSRP1;SSRP1;ortholog	FACT COMPLEX SUBUNIT SSRP1 (PTHR13711:SF258)	HMG box transcription factor(PC00218);chromatin/chromatin-binding protein(PC00024);signaling molecule(PC00171)	Homo sapiens
HUMAN|HGNC=19274|UniProtKB=Q8N0Z6	STRAP	0.0212089	0.0350631	0	Tetratricopeptide repeat protein 5;TTC5;ortholog	TETRATRICOPEPTIDE REPEAT PROTEIN 5 (PTHR26312:SF99)		Homo sapiens
HUMAN|HGNC=11465|UniProtKB=Q9Y5B9	SUPT16H	0.0186027	0.0191361	0.0900424	FACT complex subunit SPT16;SUPT16H;ortholog	FACT COMPLEX SUBUNIT SPT16 (PTHR13980:SF17)	nucleic acid binding(PC00171);transcription cofactor(PC00218)	Homo sapiens
HUMAN|HGNC=11998|UniProtKB=P04637	TP53	0.029036	0	0	Cellular tumor antigen p53;TP53;ortholog	CELLULAR TUMOR ANTIGEN P53 (PTHR11447:SF27)	transcription factor(PC00218)	Homo sapiens
HUMAN|HGNC=12932|UniProtKB=Q14258	TRIM25	0.0418118	0	0	E3 ubiquitin/ISG15 ligase TRIM25;TRIM25;ortholog	E3 UBIQUITIN/ISG15 LIGASE TRIM25 (PTHR24103:SF524)		Homo sapiens
HUMAN|HGNC=16384|UniProtKB=Q13263	TRIM28	0	0	0.0357143	Transcription intermediary factor 1-beta;TRIM28;ortholog	TRANSCRIPTION INTERMEDIARY FACTOR 1-BETA (PTHR24103:SF429)	transcription cofactor(PC00218);ubiquitin-protein ligase(PC00217)	Homo sapiens
HUMAN|HGNC=12463|UniProtKB=P0CG47	UBB	0.0325203	0	0	Polyubiquitin-B;UBB;ortholog	POLYUBIQUITIN-B (PTHR10666:SF214)	ribosomal protein(PC00171)	Homo sapiens
HUMAN|HGNC=12608|UniProtKB=Q14694	USP10	0.00609756	0.0262097	0	Ubiquitin carboxyl-terminal hydrolase 10;USP10;ortholog	UBIQUITIN CARBOXYL-TERMINAL HYDROLASE 10 (PTHR24006:SF600)		Homo sapiens
HUMAN|HGNC=12666|UniProtKB=P55072	VCP	0.0304878	0.0769795	0.0284091	Transitional endoplasmic reticulum ATPase;VCP;ortholog	TRANSITIONAL ENDOPLASMIC RETICULUM ATPASE (PTHR23077:SF114)		Homo sapiens
HUMAN|HGNC=12766|UniProtKB=O96028	WHSC1	0	0	0.00868056	Histone-lysine N-methyltransferase NSD2;WHSC1;ortholog	HISTONE-LYSINE N-METHYLTRANSFERASE NSD2 (PTHR22884:SF410)	DNA binding protein(PC00171);methyltransferase(PC00009)	Homo sapiens
HUMAN|HGNC=12833|UniProtKB=P13010	XRCC5	0.0213415	0.0725806	0.0429688	X-ray repair cross-complementing protein 5;XRCC5;ortholog	X-RAY REPAIR CROSS-COMPLEMENTING PROTEIN 5 (PTHR12604:SF7)	DNA helicase(PC00171)	Homo sapiens
HUMAN|HGNC=4055|UniProtKB=P12956	XRCC6	0.0522648	0.129032	0.0714286	X-ray repair cross-complementing protein 6;XRCC6;ortholog	X-RAY REPAIR CROSS-COMPLEMENTING PROTEIN 6 (PTHR12604:SF6)	DNA helicase(PC00171)	Homo sapiens

## Sheet: Table S6 Nol12 eCLIP Repeat Ele
element	dataset	datasetid2	IP reads	IP rpr	INPUT reads	INPUT rpr	fold-enrichment	entropy
RNA28S	539_02_NOL12	NOL12-HepG2_02	10746152	0.682969	7063142	0.389939	1.75148	0.552229
RNA28S	539_01_NOL12	NOL12-HepG2_01	8547373	0.552138	7063142	0.389939	1.41596	0.277051
RNA18S	539_01_NOL12	NOL12-HepG2_01	3282443	0.212037	2072166	0.114399	1.85348	0.188763
rRNA_extra	539_02_NOL12	NOL12-HepG2_02	1557743	0.099002	692217	0.0382157	2.59061	0.135959
unique_CDS	539_01_NOL12	NOL12-HepG2_01	614542	0.0396978	452746	0.024995	1.58823	0.026495
RNA5-8S	539_02_NOL12	NOL12-HepG2_02	125264	0.00796112	40600	0.00224143	3.55181	0.0145573
RNA5-8S	539_01_NOL12	NOL12-HepG2_01	103931	0.00671367	40600	0.00224143	2.99526	0.0106256
rRNA_extra	539_01_NOL12	NOL12-HepG2_01	636055	0.0410875	692217	0.0382157	1.07515	0.00429506
unique_CDS	539_02_NOL12	NOL12-HepG2_02	428541	0.0272358	452746	0.024995	1.08965	0.00337355
SNORD	539_02_NOL12	NOL12-HepG2_02	76186	0.00484198	61526	0.0033967	1.42549	0.00247649
unique_5utr	539_01_NOL12	NOL12-HepG2_01	69415	0.00448402	63982	0.00353229	1.26944	0.00154335
tRNA	539_01_NOL12	NOL12-HepG2_01	13535	0.000874325	12432	0.000686341	1.27389	0.000305353
U14	539_02_NOL12	NOL12-HepG2_02	1214	7.71555e-05	282	1.55685e-05	4.95586	0.000178162
U14	539_01_NOL12	NOL12-HepG2_01	725	4.68331e-05	282	1.55685e-05	3.00818	7.44127e-05
Other	539_01_NOL12	NOL12-HepG2_01	1308	8.44933e-05	1291	7.1273e-05	1.18549	2.07415e-05
SVA	539_01_NOL12	NOL12-HepG2_01	1487	9.60562e-05	1693	9.34665e-05	1.02771	3.7875e-06
HSFAU	539_01_NOL12	NOL12-HepG2_01	75	4.8448e-06	53	2.926e-06	1.65577	3.52462e-06
antisense_rRNA_extra	539_02_NOL12	NOL12-HepG2_02	5	3.17774e-07	1	5.52076e-08	5.75598	8.02398e-07
RNU105	539_02_NOL12	NOL12-HepG2_02	6	3.81329e-07	2	1.10415e-07	3.45359	6.81852e-07
unique_5utr_and_3utr	539_01_NOL12	NOL12-HepG2_01	275	1.77643e-05	316	1.74456e-05	1.01827	4.63903e-07
RNU7	539_01_NOL12	NOL12-HepG2_01	37	2.3901e-06	39	2.1531e-06	1.11008	3.60089e-07
antisense_rRNA_extra	539_01_NOL12	NOL12-HepG2_01	3	1.93792e-07	1	5.52076e-08	3.51024	3.51068e-07
RNU7	539_02_NOL12	NOL12-HepG2_02	36	2.28797e-06	39	2.1531e-06	1.06264	2.00554e-07
antisense_RNU4ATAC	539_01_NOL12	NOL12-HepG2_01	2	1.29195e-07	1	5.52076e-08	2.34016	1.58471e-07
snoU109	539_01_NOL12	NOL12-HepG2_01	3	1.93792e-07	2	1.10415e-07	1.75512	1.57276e-07
antisense_RNU6ATAC	539_02_NOL12	NOL12-HepG2_02	2	1.2711e-07	1	5.52076e-08	2.30239	1.5293e-07
RNU105	539_01_NOL12	NOL12-HepG2_01	2	1.29195e-07	2	1.10415e-07	1.17008	2.92765e-08
VTRNA2	539_01_NOL12	NOL12-HepG2_01	1	6.45973e-08	1	5.52076e-08	1.17008	1.46382e-08
antisense_U8	539_02_NOL12	NOL12-HepG2_02	1	6.35548e-08	1	5.52076e-08	1.1512	1.29101e-08
antisense_H1RNA	539_02_NOL12	NOL12-HepG2_02	1	6.35548e-08	1	5.52076e-08	1.1512	1.29101e-08
telo	539_01_NOL12	NOL12-HepG2_01	65	4.19883e-06	76	4.19578e-06	1.00073	4.39888e-09
antisense_U17	539_01_NOL12	NOL12-HepG2_01	0	0	1	5.52076e-08	0	0
antisense_U17	539_02_NOL12	NOL12-HepG2_02	0	0	1	5.52076e-08	0	0
antisense_RNU5B	539_01_NOL12	NOL12-HepG2_01	0	0	1	5.52076e-08	0	0
antisense_RNU5B	539_02_NOL12	NOL12-HepG2_02	0	0	1	5.52076e-08	0	0
antisense_snRNA	539_01_NOL12	NOL12-HepG2_01	0	0	1	5.52076e-08	0	0
antisense_snRNA	539_02_NOL12	NOL12-HepG2_02	0	0	1	5.52076e-08	0	0
KER	539_01_NOL12	NOL12-HepG2_01	0	0	1	5.52076e-08	0	0
KER	539_02_NOL12	NOL12-HepG2_02	0	0	1	5.52076e-08	0	0
antisense_RNU105	539_01_NOL12	NOL12-HepG2_01	0	0	1	5.52076e-08	0	0
antisense_RNU105	539_02_NOL12	NOL12-HepG2_02	0	0	1	5.52076e-08	0	0
antisense_KER	539_01_NOL12	NOL12-HepG2_01	0	0	1	5.52076e-08	0	0
antisense_KER	539_02_NOL12	NOL12-HepG2_02	0	0	1	5.52076e-08	0	0
antisense_Eutr	539_01_NOL12	NOL12-HepG2_01	0	0	1	5.52076e-08	0	0
antisense_Eutr	539_02_NOL12	NOL12-HepG2_02	0	0	1	5.52076e-08	0	0
antisense_RNU5E	539_01_NOL12	NOL12-HepG2_01	0	0	1	5.52076e-08	0	0
antisense_RNU5E	539_02_NOL12	NOL12-HepG2_02	0	0	1	5.52076e-08	0	0
antisense_VTRNA2	539_01_NOL12	NOL12-HepG2_01	0	0	1	5.52076e-08	0	0
antisense_VTRNA2	539_02_NOL12	NOL12-HepG2_02	0	0	1	5.52076e-08	0	0
antisense_RNU4ATAC	539_02_NOL12	NOL12-HepG2_02	0	0	1	5.52076e-08	0	0
antisense_ERV3	539_01_NOL12	NOL12-HepG2_01	0	0	1	5.52076e-08	0	0
antisense_ERV3	539_02_NOL12	NOL12-HepG2_02	0	0	1	5.52076e-08	0	0
ERV3	539_01_NOL12	NOL12-HepG2_01	0	0	1	5.52076e-08	0	0
ERV3	539_02_NOL12	NOL12-HepG2_02	0	0	1	5.52076e-08	0	0
VTRNA3	539_01_NOL12	NOL12-HepG2_01	0	0	1	5.52076e-08	0	0
VTRNA3	539_02_NOL12	NOL12-HepG2_02	0	0	1	5.52076e-08	0	0
antisense_RNU6ATAC	539_01_NOL12	NOL12-HepG2_01	0	0	1	5.52076e-08	0	0
antisense_RNU5D	539_01_NOL12	NOL12-HepG2_01	0	0	1	5.52076e-08	0	0
antisense_RNU5D	539_02_NOL12	NOL12-HepG2_02	0	0	1	5.52076e-08	0	0
antisense_RNU5A	539_01_NOL12	NOL12-HepG2_01	0	0	1	5.52076e-08	0	0
antisense_RNU5A	539_02_NOL12	NOL12-HepG2_02	0	0	1	5.52076e-08	0	0
antisense_HSFAU	539_01_NOL12	NOL12-HepG2_01	0	0	1	5.52076e-08	0	0
antisense_HSFAU	539_02_NOL12	NOL12-HepG2_02	0	0	1	5.52076e-08	0	0
antisense_Penelope	539_01_NOL12	NOL12-HepG2_01	0	0	1	5.52076e-08	0	0
antisense_Penelope	539_02_NOL12	NOL12-HepG2_02	0	0	1	5.52076e-08	0	0
antisense_RNA5-8S	539_01_NOL12	NOL12-HepG2_01	0	0	1	5.52076e-08	0	0
antisense_RNA5-8S	539_02_NOL12	NOL12-HepG2_02	0	0	1	5.52076e-08	0	0
antisense_VTRNA1	539_01_NOL12	NOL12-HepG2_01	0	0	1	5.52076e-08	0	0
antisense_VTRNA1	539_02_NOL12	NOL12-HepG2_02	0	0	1	5.52076e-08	0	0
antisense_VTRNA3	539_01_NOL12	NOL12-HepG2_01	0	0	1	5.52076e-08	0	0
antisense_VTRNA3	539_02_NOL12	NOL12-HepG2_02	0	0	1	5.52076e-08	0	0
antisense_RNU11	539_01_NOL12	NOL12-HepG2_01	0	0	2	1.10415e-07	0	0
antisense_RNU11	539_02_NOL12	NOL12-HepG2_02	0	0	2	1.10415e-07	0	0
antisense_U8	539_01_NOL12	NOL12-HepG2_01	0	0	1	5.52076e-08	0	0
antisense_RNU5F	539_01_NOL12	NOL12-HepG2_01	0	0	1	5.52076e-08	0	0
antisense_RNU5F	539_02_NOL12	NOL12-HepG2_02	0	0	1	5.52076e-08	0	0
antisense_ERV2	539_01_NOL12	NOL12-HepG2_01	0	0	1	5.52076e-08	0	0
antisense_ERV2	539_02_NOL12	NOL12-HepG2_02	0	0	1	5.52076e-08	0	0
Eutr	539_01_NOL12	NOL12-HepG2_01	0	0	2	1.10415e-07	0	0
Eutr	539_02_NOL12	NOL12-HepG2_02	0	0	2	1.10415e-07	0	0
antisense_H1RNA	539_01_NOL12	NOL12-HepG2_01	0	0	1	5.52076e-08	0	0
Penelope	539_02_NOL12	NOL12-HepG2_02	0	0	7	3.86453e-07	0	0
antisense_U14	539_01_NOL12	NOL12-HepG2_01	0	0	1	5.52076e-08	0	0
antisense_U14	539_02_NOL12	NOL12-HepG2_02	0	0	1	5.52076e-08	0	0
VTRNA2	539_02_NOL12	NOL12-HepG2_02	0	0	1	5.52076e-08	0	0
ERV2	539_01_NOL12	NOL12-HepG2_01	0	0	1	5.52076e-08	0	0
ERV2	539_02_NOL12	NOL12-HepG2_02	0	0	1	5.52076e-08	0	0
snoU109	539_02_NOL12	NOL12-HepG2_02	1	6.35548e-08	2	1.10415e-07	0.575598	-5.06447e-08
antisense_telo	539_01_NOL12	NOL12-HepG2_01	29	1.87332e-06	35	1.93227e-06	0.969495	-8.37276e-08
antisense_SNORD	539_01_NOL12	NOL12-HepG2_01	4	2.58389e-07	6	3.31246e-07	0.780053	-9.25952e-08
antisense_RNU12	539_01_NOL12	NOL12-HepG2_01	2	1.29195e-07	4	2.2083e-07	0.58504	-9.99182e-08
antisense_RNU12	539_02_NOL12	NOL12-HepG2_02	1	6.35548e-08	4	2.2083e-07	0.287799	-1.14199e-07
antisense_RNA18S	539_01_NOL12	NOL12-HepG2_01	6	3.87584e-07	9	4.96869e-07	0.780053	-1.38893e-07
antisense_SNORD	539_02_NOL12	NOL12-HepG2_02	1	6.35548e-08	6	3.31246e-07	0.191866	-1.51377e-07
antisense_RNU1	539_02_NOL12	NOL12-HepG2_02	3	1.90664e-07	6	3.31246e-07	0.575598	-1.51934e-07
antisense_RNU1	539_01_NOL12	NOL12-HepG2_01	1	6.45973e-08	6	3.31246e-07	0.195013	-1.52343e-07
Penelope	539_01_NOL12	NOL12-HepG2_01	1	6.45973e-08	7	3.86453e-07	0.167154	-1.66709e-07
Merlin	539_01_NOL12	NOL12-HepG2_01	6	3.87584e-07	10	5.52076e-07	0.702048	-1.97807e-07
Merlin	539_02_NOL12	NOL12-HepG2_02	1	6.35548e-08	10	5.52076e-07	0.11512	-1.98214e-07
antisense_RNU5	539_02_NOL12	NOL12-HepG2_02	1	6.35548e-08	12	6.62491e-07	0.095933	-2.14931e-07
antisense_RNA18S	539_02_NOL12	NOL12-HepG2_02	3	1.90664e-07	9	4.96869e-07	0.383732	-2.63466e-07
antisense_RNU5	539_01_NOL12	NOL12-HepG2_01	2	1.29195e-07	12	6.62491e-07	0.195013	-3.04687e-07
antisense_Merlin	539_02_NOL12	NOL12-HepG2_02	6	3.81329e-07	13	7.17699e-07	0.531321	-3.47903e-07
antisense_Merlin	539_01_NOL12	NOL12-HepG2_01	5	3.22987e-07	13	7.17699e-07	0.450031	-3.7205e-07
Dong-R4	539_02_NOL12	NOL12-HepG2_02	2	1.2711e-07	37	2.04268e-06	0.0622268	-5.09242e-07
antisense_telo	539_02_NOL12	NOL12-HepG2_02	23	1.46176e-06	35	1.93227e-06	0.7565	-5.88487e-07
Dong-R4	539_01_NOL12	NOL12-HepG2_01	3	1.93792e-07	37	2.04268e-06	0.0948714	-6.58483e-07
centr	539_01_NOL12	NOL12-HepG2_01	79	5.10319e-06	102	5.63118e-06	0.906239	-7.24843e-07
antisense_RNU4	539_01_NOL12	NOL12-HepG2_01	21	1.35654e-06	37	2.04268e-06	0.6641	-8.01078e-07
antisense_RNU4	539_02_NOL12	NOL12-HepG2_02	5	3.17774e-07	37	2.04268e-06	0.155567	-8.5303e-07
scRNA	539_02_NOL12	NOL12-HepG2_02	7	4.44883e-07	34	1.87706e-06	0.237011	-9.24012e-07
scRNA	539_01_NOL12	NOL12-HepG2_01	8	5.16779e-07	34	1.87706e-06	0.275313	-9.6165e-07
telo	539_02_NOL12	NOL12-HepG2_02	54	3.43196e-06	76	4.19578e-06	0.817955	-9.94948e-07
antisense_scRNA	539_02_NOL12	NOL12-HepG2_02	6	3.81329e-07	45	2.48434e-06	0.153493	-1.03102e-06
antisense_snoU109	539_02_NOL12	NOL12-HepG2_02	6	3.81329e-07	48	2.64997e-06	0.143899	-1.06653e-06
antisense_RNU7	539_02_NOL12	NOL12-HepG2_02	8	5.08438e-07	47	2.59476e-06	0.195948	-1.19557e-06
antisense_scRNA	539_01_NOL12	NOL12-HepG2_01	10	6.45973e-07	45	2.48434e-06	0.260018	-1.25533e-06
ERV	539_02_NOL12	NOL12-HepG2_02	8	5.08438e-07	57	3.14683e-06	0.161571	-1.33707e-06
antisense_RNU7	539_01_NOL12	NOL12-HepG2_01	17	1.09815e-06	47	2.59476e-06	0.42322	-1.36228e-06
antisense_snoU109	539_01_NOL12	NOL12-HepG2_01	16	1.03356e-06	48	2.64997e-06	0.390027	-1.40394e-06
antisense_Other	539_02_NOL12	NOL12-HepG2_02	7	4.44883e-07	78	4.30619e-06	0.103312	-1.45695e-06
VTRNA1	539_01_NOL12	NOL12-HepG2_01	11	7.10571e-07	55	3.03642e-06	0.234016	-1.48887e-06
HSFAU	539_02_NOL12	NOL12-HepG2_02	20	1.2711e-06	53	2.926e-06	0.434413	-1.52895e-06
VTRNA1	539_02_NOL12	NOL12-HepG2_02	13	8.26212e-07	55	3.03642e-06	0.272101	-1.55145e-06
antisense_RTE-BovB	539_02_NOL12	NOL12-HepG2_02	7	4.44883e-07	105	5.7968e-06	0.0767464	-1.64774e-06
ERV	539_01_NOL12	NOL12-HepG2_01	17	1.09815e-06	57	3.14683e-06	0.348971	-1.6679e-06
antisense_RNA28S	539_01_NOL12	NOL12-HepG2_01	27	1.74413e-06	62	3.42287e-06	0.509551	-1.69652e-06
antisense_RNA28S	539_02_NOL12	NOL12-HepG2_02	17	1.08043e-06	62	3.42287e-06	0.31565	-1.79741e-06
antisense_MRP	539_02_NOL12	NOL12-HepG2_02	12	7.62657e-07	96	5.29993e-06	0.143899	-2.13305e-06
antisense_Other	539_01_NOL12	NOL12-HepG2_01	25	1.61493e-06	78	4.30619e-06	0.375026	-2.28503e-06
centr	539_02_NOL12	NOL12-HepG2_02	55	3.49551e-06	102	5.63118e-06	0.620743	-2.40468e-06
antisense_RNA5S	539_02_NOL12	NOL12-HepG2_02	13	8.26212e-07	117	6.45929e-06	0.127911	-2.4512e-06
antisense_ERV	539_02_NOL12	NOL12-HepG2_02	13	8.26212e-07	127	7.01137e-06	0.117839	-2.54896e-06
antisense_Dong-R4	539_02_NOL12	NOL12-HepG2_02	18	1.14399e-06	99	5.46555e-06	0.209308	-2.58117e-06
RTE-BovB	539_02_NOL12	NOL12-HepG2_02	18	1.14399e-06	99	5.46555e-06	0.209308	-2.58117e-06
antisense_Deu	539_02_NOL12	NOL12-HepG2_02	12	7.62657e-07	158	8.7228e-06	0.0874326	-2.68126e-06
antisense_Dong-R4	539_01_NOL12	NOL12-HepG2_01	40	2.58389e-06	99	5.46555e-06	0.47276	-2.79273e-06
antisense_MRP	539_01_NOL12	NOL12-HepG2_01	32	2.06711e-06	96	5.29993e-06	0.390027	-2.80788e-06
RTE-BovB	539_01_NOL12	NOL12-HepG2_01	39	2.5193e-06	99	5.46555e-06	0.460941	-2.81493e-06
antisense_RTE-BovB	539_01_NOL12	NOL12-HepG2_01	22	1.42114e-06	105	5.7968e-06	0.24516	-2.88237e-06
RNU6ATAC	539_01_NOL12	NOL12-HepG2_01	59	3.81124e-06	124	6.84574e-06	0.556732	-3.22029e-06
antisense_RNA5S	539_01_NOL12	NOL12-HepG2_01	48	3.10067e-06	117	6.45929e-06	0.480033	-3.28298e-06
RNU6ATAC	539_02_NOL12	NOL12-HepG2_02	51	3.24129e-06	124	6.84574e-06	0.473476	-3.49618e-06
LTR	539_02_NOL12	NOL12-HepG2_02	17	1.08043e-06	186	1.02686e-05	0.105217	-3.50985e-06
antisense_ERV	539_01_NOL12	NOL12-HepG2_01	40	2.58389e-06	127	7.01137e-06	0.368529	-3.72119e-06
SINE	539_02_NOL12	NOL12-HepG2_02	18	1.14399e-06	215	1.18696e-05	0.0963792	-3.86111e-06
antisense_snoU13	539_02_NOL12	NOL12-HepG2_02	20	1.2711e-06	199	1.09863e-05	0.115698	-3.95509e-06
MuDR	539_02_NOL12	NOL12-HepG2_02	24	1.52531e-06	178	9.82696e-06	0.155217	-4.09949e-06
Deu	539_02_NOL12	NOL12-HepG2_02	24	1.52531e-06	184	1.01582e-05	0.150156	-4.17245e-06
antisense_Deu	539_01_NOL12	NOL12-HepG2_01	60	3.87584e-06	158	8.7228e-06	0.444334	-4.53583e-06
MuDR	539_01_NOL12	NOL12-HepG2_01	66	4.26342e-06	178	9.82696e-06	0.43385	-5.13628e-06
antisense_LTR	539_02_NOL12	NOL12-HepG2_02	32	2.03375e-06	217	1.19801e-05	0.169762	-5.20319e-06
Deu	539_01_NOL12	NOL12-HepG2_01	72	4.65101e-06	184	1.01582e-05	0.457857	-5.24182e-06
LTR	539_01_NOL12	NOL12-HepG2_01	51	3.29446e-06	186	1.02686e-05	0.320828	-5.40334e-06
Satellite	539_01_NOL12	NOL12-HepG2_01	115	7.42869e-06	230	1.26978e-05	0.58504	-5.7453e-06
antisense_snoU13	539_01_NOL12	NOL12-HepG2_01	61	3.94044e-06	199	1.09863e-05	0.358668	-5.82901e-06
Helitron	539_02_NOL12	NOL12-HepG2_02	34	2.16086e-06	275	1.51821e-05	0.14233	-6.07784e-06
SINE	539_01_NOL12	NOL12-HepG2_01	77	4.974e-06	215	1.18696e-05	0.419052	-6.24136e-06
antisense_LTR	539_01_NOL12	NOL12-HepG2_01	71	4.58641e-06	217	1.19801e-05	0.382837	-6.35308e-06
antisense_PiggyBac	539_02_NOL12	NOL12-HepG2_02	28	1.77953e-06	405	2.23591e-05	0.0795888	-6.49759e-06
unique_5utr_and_3utr	539_02_NOL12	NOL12-HepG2_02	187	1.18847e-05	316	1.74456e-05	0.681246	-6.58121e-06
Satellite	539_02_NOL12	NOL12-HepG2_02	76	4.83016e-06	230	1.26978e-05	0.380395	-6.73532e-06
antisense_MuDR	539_02_NOL12	NOL12-HepG2_02	33	2.09731e-06	358	1.97643e-05	0.106116	-6.78749e-06
antisense_RNU2	539_02_NOL12	NOL12-HepG2_02	30	1.90664e-06	412	2.27455e-05	0.0838249	-6.81907e-06
antisense_SINE	539_01_NOL12	NOL12-HepG2_01	247	1.59555e-05	393	2.16966e-05	0.735394	-7.07486e-06
antisense_Helitron	539_02_NOL12	NOL12-HepG2_02	35	2.22442e-06	369	2.03716e-05	0.109192	-7.10715e-06
antisense_RNU6	539_02_NOL12	NOL12-HepG2_02	43	2.73286e-06	317	1.75008e-05	0.156156	-7.32116e-06
antisense_centr	539_01_NOL12	NOL12-HepG2_01	123	7.94547e-06	274	1.51269e-05	0.525255	-7.38063e-06
antisense_acro	539_02_NOL12	NOL12-HepG2_02	40	2.54219e-06	351	1.93779e-05	0.13119	-7.4493e-06
antisense_centr	539_02_NOL12	NOL12-HepG2_02	65	4.13106e-06	274	1.51269e-05	0.273094	-7.73554e-06
snoU13	539_02_NOL12	NOL12-HepG2_02	155	9.85099e-06	308	1.70039e-05	0.579335	-7.75794e-06
antisense_SCARNA	539_02_NOL12	NOL12-HepG2_02	45	2.85996e-06	348	1.92123e-05	0.148862	-7.85906e-06
snoU13	539_01_NOL12	NOL12-HepG2_01	149	9.625e-06	308	1.70039e-05	0.566045	-7.90223e-06
Helitron	539_01_NOL12	NOL12-HepG2_01	83	5.36158e-06	275	1.51821e-05	0.353151	-8.05117e-06
PiggyBac	539_02_NOL12	NOL12-HepG2_02	39	2.47864e-06	456	2.51747e-05	0.0984575	-8.28944e-06
antisense_RNU6	539_01_NOL12	NOL12-HepG2_01	137	8.84984e-06	317	1.75008e-05	0.505681	-8.70558e-06
antisense_SCARNA	539_01_NOL12	NOL12-HepG2_01	118	7.62249e-06	348	1.92123e-05	0.396751	-1.01661e-05
antisense_SINE	539_02_NOL12	NOL12-HepG2_02	70	4.44883e-06	393	2.16966e-05	0.205048	-1.01699e-05
antisense_acro	539_01_NOL12	NOL12-HepG2_01	124	8.01007e-06	351	1.93779e-05	0.413362	-1.0209e-05
antisense_MuDR	539_01_NOL12	NOL12-HepG2_01	97	6.26594e-06	358	1.97643e-05	0.317033	-1.03845e-05
antisense_RN7SK	539_02_NOL12	NOL12-HepG2_02	62	3.9404e-06	447	2.46778e-05	0.159674	-1.04294e-05
RNU4ATAC	539_01_NOL12	NOL12-HepG2_01	67	4.32802e-06	424	2.3408e-05	0.184895	-1.05397e-05
antisense_RN7SK	539_01_NOL12	NOL12-HepG2_01	235	1.51804e-05	447	2.46778e-05	0.615143	-1.06415e-05
antisense_Helitron	539_01_NOL12	NOL12-HepG2_01	105	6.78272e-06	369	2.03716e-05	0.33295	-1.07616e-05
DNA	539_02_NOL12	NOL12-HepG2_02	55	3.49551e-06	540	2.98121e-05	0.117251	-1.08093e-05
antisense_RNU2	539_01_NOL12	NOL12-HepG2_01	76	4.9094e-06	412	2.27455e-05	0.21584	-1.08594e-05
antisense_DNA	539_02_NOL12	NOL12-HepG2_02	53	3.3684e-06	588	3.24621e-05	0.103764	-1.101e-05
RNU4ATAC	539_02_NOL12	NOL12-HepG2_02	82	5.21149e-06	424	2.3408e-05	0.222637	-1.12945e-05
antisense_PiggyBac	539_01_NOL12	NOL12-HepG2_01	118	7.62249e-06	405	2.23591e-05	0.340912	-1.18341e-05
RNU5D	539_02_NOL12	NOL12-HepG2_02	51	3.24129e-06	752	4.15161e-05	0.0780731	-1.19248e-05
acro	539_01_NOL12	NOL12-HepG2_01	195	1.25965e-05	461	2.54507e-05	0.494936	-1.27815e-05
acro	539_02_NOL12	NOL12-HepG2_02	116	7.37235e-06	461	2.54507e-05	0.289672	-1.31781e-05
antisense_YRNA	539_02_NOL12	NOL12-HepG2_02	82	5.21149e-06	551	3.04194e-05	0.171321	-1.32644e-05
PiggyBac	539_01_NOL12	NOL12-HepG2_01	127	8.20386e-06	456	2.51747e-05	0.325878	-1.32706e-05
RNU5F	539_01_NOL12	NOL12-HepG2_01	42	2.71309e-06	1511	8.34187e-05	0.0325237	-1.34091e-05
SVA	539_02_NOL12	NOL12-HepG2_02	1295	8.23034e-05	1693	9.34665e-05	0.880566	-1.51024e-05
antisense_YRNA	539_01_NOL12	NOL12-HepG2_01	228	1.47282e-05	551	3.04194e-05	0.484171	-1.54117e-05
RNU5D	539_01_NOL12	NOL12-HepG2_01	79	5.10319e-06	752	4.15161e-05	0.122921	-1.54331e-05
DNA	539_01_NOL12	NOL12-HepG2_01	172	1.11107e-05	540	2.98121e-05	0.372692	-1.58211e-05
antisense_tRNA	539_02_NOL12	NOL12-HepG2_02	87	5.52927e-06	750	4.14057e-05	0.133539	-1.60607e-05
U8	539_01_NOL12	NOL12-HepG2_01	339	2.18985e-05	663	3.66027e-05	0.598276	-1.62293e-05
antisense_TcMar	539_02_NOL12	NOL12-HepG2_02	78	4.95727e-06	877	4.84171e-05	0.102387	-1.6299e-05
antisense_RNU3	539_02_NOL12	NOL12-HepG2_02	108	6.86392e-06	666	3.67683e-05	0.18668	-1.662e-05
TcMar	539_02_NOL12	NOL12-HepG2_02	84	5.3386e-06	844	4.65952e-05	0.114574	-1.66866e-05
antisense_DNA	539_01_NOL12	NOL12-HepG2_01	205	1.32425e-05	588	3.24621e-05	0.407936	-1.71302e-05
U8	539_02_NOL12	NOL12-HepG2_02	243	1.54438e-05	663	3.66027e-05	0.421931	-1.92263e-05
antisense_RNU3	539_01_NOL12	NOL12-HepG2_01	218	1.40822e-05	666	3.67683e-05	0.382999	-1.94981e-05
TcMar-Tc2	539_02_NOL12	NOL12-HepG2_02	95	6.0377e-06	1045	5.7692e-05	0.104654	-1.96606e-05
Unknown	539_02_NOL12	NOL12-HepG2_02	126	8.0079e-06	854	4.71473e-05	0.169849	-2.04816e-05
antisense_Satellite	539_01_NOL12	NOL12-HepG2_01	375	2.4224e-05	791	4.36692e-05	0.554716	-2.05948e-05
antisense_TcMar-Tc2	539_02_NOL12	NOL12-HepG2_02	94	5.97415e-06	1283	7.08314e-05	0.0843433	-2.13133e-05
antisense_tRNA	539_01_NOL12	NOL12-HepG2_01	235	1.51804e-05	750	4.14057e-05	0.366625	-2.19755e-05
RNU5F	539_02_NOL12	NOL12-HepG2_02	93	5.91059e-06	1511	8.34187e-05	0.0708545	-2.25725e-05
antisense_Satellite	539_02_NOL12	NOL12-HepG2_02	208	1.32194e-05	791	4.36692e-05	0.302716	-2.27897e-05
Unknown	539_01_NOL12	NOL12-HepG2_01	385	2.487e-05	854	4.71473e-05	0.527495	-2.29493e-05
antisense_Unknown	539_02_NOL12	NOL12-HepG2_02	135	8.57989e-06	1083	5.97899e-05	0.143501	-2.40312e-05
Gypsy	539_02_NOL12	NOL12-HepG2_02	161	1.02323e-05	953	5.26129e-05	0.194483	-2.41716e-05
TcMar	539_01_NOL12	NOL12-HepG2_01	290	1.87332e-05	844	4.65952e-05	0.402042	-2.46264e-05
antisense_hAT	539_02_NOL12	NOL12-HepG2_02	150	9.53322e-06	1097	6.05628e-05	0.157411	-2.54289e-05
antisense_TcMar	539_01_NOL12	NOL12-HepG2_01	270	1.74413e-05	877	4.84171e-05	0.36023	-2.56912e-05
Gypsy	539_01_NOL12	NOL12-HepG2_01	368	2.37718e-05	953	5.26129e-05	0.451825	-2.72464e-05
hAT	539_02_NOL12	NOL12-HepG2_02	181	1.15034e-05	1174	6.48137e-05	0.177484	-2.86922e-05
RNU3	539_01_NOL12	NOL12-HepG2_01	578	3.73373e-05	1155	6.37648e-05	0.585547	-2.88297e-05
RNU3	539_02_NOL12	NOL12-HepG2_02	558	3.54636e-05	1155	6.37648e-05	0.556162	-3.00172e-05
TcMar-Mariner	539_02_NOL12	NOL12-HepG2_02	184	1.16941e-05	1258	6.94512e-05	0.168378	-3.00564e-05
antisense_Gypsy	539_02_NOL12	NOL12-HepG2_02	157	9.9781e-06	1500	8.28114e-05	0.120492	-3.04631e-05
TcMar-Tc2	539_01_NOL12	NOL12-HepG2_01	332	2.14463e-05	1045	5.7692e-05	0.371738	-3.06176e-05
antisense_Unknown	539_01_NOL12	NOL12-HepG2_01	364	2.35134e-05	1083	5.97899e-05	0.393268	-3.16588e-05
antisense_hAT	539_01_NOL12	NOL12-HepG2_01	373	2.40948e-05	1097	6.05628e-05	0.397849	-3.20391e-05
antisense_hAT-Blackjack	539_02_NOL12	NOL12-HepG2_02	168	1.06772e-05	1589	8.77249e-05	0.121712	-3.24422e-05
hAT	539_01_NOL12	NOL12-HepG2_01	463	2.99086e-05	1174	6.48137e-05	0.461454	-3.33702e-05
antisense_TcMar-Mariner	539_02_NOL12	NOL12-HepG2_02	166	1.05501e-05	1752	9.67237e-05	0.109074	-3.37246e-05
RN7SK	539_01_NOL12	NOL12-HepG2_01	10302	0.000665482	12513	0.000690813	0.963331	-3.58668e-05
TcMar-Mariner	539_01_NOL12	NOL12-HepG2_01	429	2.77123e-05	1258	6.94512e-05	0.399018	-3.67319e-05
hAT-Blackjack	539_02_NOL12	NOL12-HepG2_02	197	1.25203e-05	1753	9.6779e-05	0.12937	-3.69402e-05
antisense_TcMar-Tc2	539_01_NOL12	NOL12-HepG2_01	351	2.26737e-05	1283	7.08314e-05	0.320108	-3.72612e-05
Other	539_02_NOL12	NOL12-HepG2_02	456	2.8981e-05	1291	7.1273e-05	0.406619	-3.76246e-05
antisense_Gypsy	539_01_NOL12	NOL12-HepG2_01	453	2.92626e-05	1500	8.28114e-05	0.353364	-4.39165e-05
antisense_hAT-Blackjack	539_01_NOL12	NOL12-HepG2_01	555	3.58515e-05	1589	8.77249e-05	0.408681	-4.62826e-05
RTE	539_02_NOL12	NOL12-HepG2_02	247	1.5698e-05	2451	0.000135314	0.116012	-4.8784e-05
hAT-Blackjack	539_01_NOL12	NOL12-HepG2_01	648	4.18591e-05	1753	9.6779e-05	0.432522	-5.0614e-05
RNU11	539_01_NOL12	NOL12-HepG2_01	136	8.78524e-06	8775	0.000484447	0.0181346	-5.08236e-05
antisense_TcMar-Mariner	539_01_NOL12	NOL12-HepG2_01	625	4.03733e-05	1752	9.67237e-05	0.417409	-5.08893e-05
YRNA	539_02_NOL12	NOL12-HepG2_02	188	1.19483e-05	4177	0.000230602	0.0518135	-5.10256e-05
U17	539_01_NOL12	NOL12-HepG2_01	441	2.84874e-05	2000	0.000110415	0.258003	-5.56799e-05
RNU11	539_02_NOL12	NOL12-HepG2_02	161	1.02323e-05	8775	0.000484447	0.0211217	-5.69442e-05
U17	539_02_NOL12	NOL12-HepG2_02	512	3.254e-05	2000	0.000110415	0.294706	-5.73567e-05
antisense_hAT-Tip100	539_02_NOL12	NOL12-HepG2_02	329	2.09095e-05	2544	0.000140448	0.148877	-5.74553e-05
RNU5B	539_01_NOL12	NOL12-HepG2_01	135	8.72064e-06	18704	0.0010326	0.0084453	-6.00646e-05
hAT-Tip100	539_02_NOL12	NOL12-HepG2_02	385	2.44686e-05	2619	0.000144589	0.169229	-6.27118e-05
antisense_RTE	539_02_NOL12	NOL12-HepG2_02	324	2.05917e-05	3372	0.00018616	0.110613	-6.54077e-05
SNORD	539_01_NOL12	NOL12-HepG2_01	51829	0.00334802	61526	0.0033967	0.985666	-6.97368e-05
RTE	539_01_NOL12	NOL12-HepG2_01	786	5.07735e-05	2451	0.000135314	0.375228	-7.1802e-05
antisense_hAT-Tip100	539_01_NOL12	NOL12-HepG2_01	1001	6.46619e-05	2544	0.000140448	0.460397	-7.23599e-05
hAT-Tip100	539_01_NOL12	NOL12-HepG2_01	986	6.3693e-05	2619	0.000144589	0.440511	-7.53328e-05
RNU6	539_01_NOL12	NOL12-HepG2_01	6188	0.000399728	8289	0.000457616	0.873502	-7.7994e-05
RNU4	539_02_NOL12	NOL12-HepG2_02	600	3.81329e-05	3310	0.000182737	0.208676	-8.62056e-05
YRNA	539_01_NOL12	NOL12-HepG2_01	484	3.12651e-05	4177	0.000230602	0.13558	-9.01305e-05
RNU4	539_01_NOL12	NOL12-HepG2_01	696	4.49597e-05	3310	0.000182737	0.246035	-9.09565e-05
antisense_RTE	539_01_NOL12	NOL12-HepG2_01	1015	6.55663e-05	3372	0.00018616	0.352204	-9.87112e-05
SCARNA	539_02_NOL12	NOL12-HepG2_02	3424	0.000217612	5412	0.000298784	0.728325	-9.95238e-05
RNU5B	539_02_NOL12	NOL12-HepG2_02	264	1.67785e-05	18704	0.0010326	0.0162487	-9.97233e-05
RNU6	539_02_NOL12	NOL12-HepG2_02	5978	0.00037993	8289	0.000457616	0.830239	-0.000101974
ERVK	539_01_NOL12	NOL12-HepG2_01	1573	0.000101612	3807	0.000210175	0.483461	-0.000106543
ERVK	539_02_NOL12	NOL12-HepG2_02	917	5.82797e-05	3807	0.000210175	0.277291	-0.000107848
antisense_SVA	539_01_NOL12	NOL12-HepG2_01	3445	0.000222538	5773	0.000318714	0.698238	-0.000115321
antisense_ERVK	539_02_NOL12	NOL12-HepG2_02	692	4.39799e-05	5066	0.000279682	0.15725	-0.000117377
RNU5	539_01_NOL12	NOL12-HepG2_01	423	2.73247e-05	10126	0.000559032	0.0488785	-0.00011899
SCARNA	539_01_NOL12	NOL12-HepG2_01	2916	0.000188366	5412	0.000298784	0.630442	-0.000125369
RNU5	539_02_NOL12	NOL12-HepG2_02	478	3.03792e-05	10126	0.000559032	0.0543424	-0.000127647
RNU12	539_01_NOL12	NOL12-HepG2_01	1120	7.2349e-05	5002	0.000276149	0.261993	-0.000139807
RNU5E	539_01_NOL12	NOL12-HepG2_01	730	4.71561e-05	6793	0.000375025	0.125741	-0.000141066
RNU5A	539_02_NOL12	NOL12-HepG2_02	493	3.13325e-05	13628	0.000752369	0.0416451	-0.000143682
antisense_ERVK	539_01_NOL12	NOL12-HepG2_01	1856	0.000119893	5066	0.000279682	0.428675	-0.000146514
RNU12	539_02_NOL12	NOL12-HepG2_02	1583	0.000100607	5002	0.000276149	0.364323	-0.000146556
antisense_SVA	539_02_NOL12	NOL12-HepG2_02	1966	0.000124949	5773	0.000318714	0.392041	-0.000168796
RNU5E	539_02_NOL12	NOL12-HepG2_02	1112	7.06729e-05	6793	0.000375025	0.188448	-0.000170163
RNU5A	539_01_NOL12	NOL12-HepG2_01	672	4.34094e-05	13628	0.000752369	0.0576969	-0.000178645
antisense_CR1	539_02_NOL12	NOL12-HepG2_02	1015	6.45081e-05	9251	0.000510726	0.126307	-0.000192556
H1RNA	539_02_NOL12	NOL12-HepG2_02	1031	6.5525e-05	15198	0.000839045	0.0780947	-0.000241042
CR1	539_02_NOL12	NOL12-HepG2_02	1528	9.71117e-05	10437	0.000576202	0.168538	-0.000249466
antisense_CR1	539_01_NOL12	NOL12-HepG2_01	3062	0.000197797	9251	0.000510726	0.387286	-0.000270691
antisense_chrM	539_02_NOL12	NOL12-HepG2_02	1565	9.94632e-05	12253	0.000676459	0.147035	-0.000275092
tRNA	539_02_NOL12	NOL12-HepG2_02	6839	0.000434651	12432	0.000686341	0.633287	-0.000286465
RN7SK	539_02_NOL12	NOL12-HepG2_02	6843	0.000434905	12513	0.000690813	0.629556	-0.00029034
CR1	539_01_NOL12	NOL12-HepG2_01	3975	0.000256774	10437	0.000576202	0.445633	-0.000299418
H1RNA	539_01_NOL12	NOL12-HepG2_01	1577	0.00010187	15198	0.000839045	0.121412	-0.000309891
unique_noncoding_proxintron	539_01_NOL12	NOL12-HepG2_01	8203	0.000529892	14659	0.000809288	0.654763	-0.000323741
ERVL	539_02_NOL12	NOL12-HepG2_02	2058	0.000130796	13558	0.000748505	0.174743	-0.000329173
antisense_chrM	539_01_NOL12	NOL12-HepG2_01	3698	0.000238881	12253	0.000676459	0.353134	-0.00035873
ERVL	539_01_NOL12	NOL12-HepG2_01	5081	0.000328219	13558	0.000748505	0.4385	-0.000390368
Low_complexity	539_01_NOL12	NOL12-HepG2_01	11551	0.000746164	19498	0.00107644	0.693179	-0.000394498
antisense_Low_complexity	539_01_NOL12	NOL12-HepG2_01	10973	0.000708827	19195	0.00105971	0.668887	-0.000411237
unique_noncoding_proxintron	539_02_NOL12	NOL12-HepG2_02	4995	0.000317456	14659	0.000809288	0.392266	-0.000428597
antisense_TcMar-Tigger	539_02_NOL12	NOL12-HepG2_02	2270	0.000144269	25132	0.00138748	0.10398	-0.00047113
snRNA	539_01_NOL12	NOL12-HepG2_01	3327	0.000214915	17838	0.000984794	0.218234	-0.000471965
ERV1	539_02_NOL12	NOL12-HepG2_02	3503	0.000222632	18017	0.000994676	0.223824	-0.000480789
TcMar-Tigger	539_02_NOL12	NOL12-HepG2_02	2626	0.000166895	22457	0.0012398	0.134615	-0.000482842
ERV1	539_01_NOL12	NOL12-HepG2_01	7026	0.000453861	18017	0.000994676	0.45629	-0.00051376
snRNA	539_02_NOL12	NOL12-HepG2_02	4915	0.000312372	17838	0.000984794	0.317195	-0.000517462
Low_complexity	539_02_NOL12	NOL12-HepG2_02	9071	0.000576505	19498	0.00107644	0.535568	-0.00051935
antisense_Low_complexity	539_02_NOL12	NOL12-HepG2_02	7991	0.000507866	19195	0.00105971	0.47925	-0.000538922
MRP	539_02_NOL12	NOL12-HepG2_02	8370	0.000531953	20288	0.00112005	0.474936	-0.000571421
MRP	539_01_NOL12	NOL12-HepG2_01	4843	0.000312845	20288	0.00112005	0.279313	-0.000575649
TcMar-Tigger	539_01_NOL12	NOL12-HepG2_01	7191	0.000464519	22457	0.0012398	0.374674	-0.000657896
antisense_ERVL	539_02_NOL12	NOL12-HepG2_02	4489	0.000285297	30588	0.00168869	0.168946	-0.000731892
antisense_TcMar-Tigger	539_01_NOL12	NOL12-HepG2_01	7746	0.000500371	25132	0.00138748	0.360633	-0.000736243
ERVL-MaLR	539_02_NOL12	NOL12-HepG2_02	4828	0.000306842	29488	0.00162796	0.188483	-0.000738722
hAT-Charlie	539_02_NOL12	NOL12-HepG2_02	4089	0.000259875	35855	0.00197947	0.131285	-0.000761233
antisense_hAT-Charlie	539_02_NOL12	NOL12-HepG2_02	4315	0.000274239	39832	0.00219903	0.124709	-0.000823639
unique_5utr	539_02_NOL12	NOL12-HepG2_02	45346	0.00288195	63982	0.00353229	0.815888	-0.00084602
ERVL-MaLR	539_01_NOL12	NOL12-HepG2_01	11056	0.000714188	29488	0.00162796	0.438701	-0.000848949
antisense_ERVL	539_01_NOL12	NOL12-HepG2_01	11328	0.000731759	30588	0.00168869	0.433329	-0.000882841
antisense_ERV1	539_02_NOL12	NOL12-HepG2_02	5934	0.000377134	40810	0.00225302	0.16739	-0.00097252
hAT-Charlie	539_01_NOL12	NOL12-HepG2_01	12451	0.000804301	35855	0.00197947	0.406322	-0.00104503
antisense_hAT-Charlie	539_01_NOL12	NOL12-HepG2_01	13645	0.000881431	39832	0.00219903	0.400827	-0.00116256
antisense_ERV1	539_01_NOL12	NOL12-HepG2_01	15360	0.000992215	40810	0.00225302	0.440393	-0.00117393
Simple_repeat	539_01_NOL12	NOL12-HepG2_01	21787	0.00140738	46884	0.00258835	0.543736	-0.00123712
unique_antisense_gencode	539_01_NOL12	NOL12-HepG2_01	29848	0.0019281	55731	0.00307678	0.626663	-0.0013
antisense_ERVL-MaLR	539_02_NOL12	NOL12-HepG2_02	7669	0.000487402	60020	0.00331356	0.147093	-0.00134776
L2	539_02_NOL12	NOL12-HepG2_02	6915	0.000439481	68047	0.00375671	0.116986	-0.00136046
Simple_repeat	539_02_NOL12	NOL12-HepG2_02	14512	0.000922307	46884	0.00258835	0.356329	-0.00137305
MIR	539_02_NOL12	NOL12-HepG2_02	9728	0.000618261	69235	0.0038223	0.161751	-0.00162488
unique_antisense_gencode	539_02_NOL12	NOL12-HepG2_02	16850	0.0010709	55731	0.00307678	0.348058	-0.00163055
antisense_RN7SL	539_02_NOL12	NOL12-HepG2_02	9964	0.00063326	71413	0.00394254	0.160622	-0.0016707
antisense_ERVL-MaLR	539_01_NOL12	NOL12-HepG2_01	20504	0.0013245	60020	0.00331356	0.399722	-0.00175223
antisense_MIR	539_02_NOL12	NOL12-HepG2_02	10099	0.00064184	78209	0.00431773	0.148652	-0.00176505
antisense_RN7SL	539_01_NOL12	NOL12-HepG2_01	30767	0.00198747	71413	0.00394254	0.504108	-0.00196401
MIR	539_01_NOL12	NOL12-HepG2_01	27007	0.00174458	69235	0.0038223	0.456422	-0.0019741
L2	539_01_NOL12	NOL12-HepG2_01	20410	0.00131843	68047	0.00375671	0.350954	-0.00199169
RN7SL	539_02_NOL12	NOL12-HepG2_02	9082	0.000577204	141150	0.00779256	0.0740713	-0.00216737
unique_noncoding_distintron	539_02_NOL12	NOL12-HepG2_02	13422	0.000853032	94019	0.00519057	0.164343	-0.00222234
antisense_MIR	539_01_NOL12	NOL12-HepG2_01	27808	0.00179632	78209	0.00431773	0.416034	-0.00227276
unique_noncoding_exon	539_01_NOL12	NOL12-HepG2_01	60039	0.00387836	111323	0.00614588	0.631051	-0.0025759
unique_noncoding_distintron	539_01_NOL12	NOL12-HepG2_01	34802	0.00224812	94019	0.00519057	0.433116	-0.00271387
L1	539_02_NOL12	NOL12-HepG2_02	19396	0.00123271	111600	0.00616117	0.200077	-0.00286158
antisense_L2	539_02_NOL12	NOL12-HepG2_02	20336	0.00129245	110337	0.00609144	0.212175	-0.00289079
antisense_L2	539_01_NOL12	NOL12-HepG2_01	44766	0.00289176	110337	0.00609144	0.474726	-0.00310817
unique_noncoding_exon	539_02_NOL12	NOL12-HepG2_02	44570	0.00283264	111323	0.00614588	0.4609	-0.0031654
L1	539_01_NOL12	NOL12-HepG2_01	38909	0.00251342	111600	0.00616117	0.407945	-0.00325124
RN7SL	539_01_NOL12	NOL12-HepG2_01	20563	0.00132832	141150	0.00779256	0.170459	-0.00339052
RNU2	539_02_NOL12	NOL12-HepG2_02	24849	0.00157927	129068	0.00712554	0.221636	-0.00343293
RNU2	539_01_NOL12	NOL12-HepG2_01	30210	0.00195149	129068	0.00712554	0.273872	-0.00364621
unique_intergenic	539_02_NOL12	NOL12-HepG2_02	28508	0.00181182	140477	0.0077554	0.23362	-0.00380077
unique_intergenic	539_01_NOL12	NOL12-HepG2_01	62487	0.00403649	140477	0.0077554	0.520475	-0.00380278
Alu	539_02_NOL12	NOL12-HepG2_02	21467	0.00136433	228715	0.0126268	0.10805	-0.00437981
unique_3utr	539_01_NOL12	NOL12-HepG2_01	140230	0.00905848	233935	0.012915	0.701393	-0.00463528
antisense_L1	539_02_NOL12	NOL12-HepG2_02	24419	0.00155194	276197	0.0152482	0.101779	-0.00511597
antisense_Alu	539_02_NOL12	NOL12-HepG2_02	28836	0.00183267	347110	0.0191631	0.095635	-0.00620599
Alu	539_01_NOL12	NOL12-HepG2_01	46522	0.0030052	228715	0.0126268	0.238001	-0.00622364
unique_3utr	539_02_NOL12	NOL12-HepG2_02	57727	0.00366883	233935	0.012915	0.284075	-0.00666133
RNU1	539_01_NOL12	NOL12-HepG2_01	25021	0.00161629	567745	0.0313438	0.0515664	-0.00691356
antisense_L1	539_01_NOL12	NOL12-HepG2_01	90271	0.00583127	276197	0.0152482	0.382424	-0.00808654
RNU1	539_02_NOL12	NOL12-HepG2_02	35064	0.00222848	567745	0.0313438	0.071098	-0.00849955
unique_proxintron	539_01_NOL12	NOL12-HepG2_01	216207	0.0139664	393185	0.0217068	0.643411	-0.00888525
antisense_Alu	539_01_NOL12	NOL12-HepG2_01	92495	0.00597493	347110	0.0191631	0.311793	-0.0100459
unique_proxintron	539_02_NOL12	NOL12-HepG2_02	138925	0.00882935	393185	0.0217068	0.406755	-0.0114585
RNA18S	539_02_NOL12	NOL12-HepG2_02	1630708	0.103639	2072166	0.114399	0.905943	-0.0147694
RNA5S	539_01_NOL12	NOL12-HepG2_01	63206	0.00408294	1564046	0.0863473	0.0472851	-0.017975
RNA5S	539_02_NOL12	NOL12-HepG2_02	85227	0.00541658	1564046	0.0863473	0.0627302	-0.0216376
chrM	539_02_NOL12	NOL12-HepG2_02	175731	0.0111685	793456	0.0438048	0.254962	-0.0220204
chrM	539_01_NOL12	NOL12-HepG2_01	275710	0.0178101	793456	0.0438048	0.406579	-0.0231245
unique_distintron	539_02_NOL12	NOL12-HepG2_02	178422	0.0113396	1304181	0.0720007	0.157492	-0.0302386
unique_distintron	539_01_NOL12	NOL12-HepG2_01	488483	0.0315547	1304181	0.0720007	0.438255	-0.037555
